# Supplementary material for: Host availability drives distributions of fungal endophytes in the imperilled boreal realm
Source: Springer Nature journal article supplement (doi:10.1038/s41559-019-0975-2), 2019-09-23
Supplement: MOESM3 [file 41559_2019_975_MOESM3_ESM.xlsx]

## Sheet: Supplementary Table 1
Supplementary Table 1. Sampling sites and collection information (sampling date, latitude, longitude, elevation, and climate).
Site abbreviation	Location	Site details*	Microsite	Sampling year**	Continent	Latitude	Longitude	Elevation (m.a.s.l.)	Mean annual precipitation (mm) †	Mean annual temperature (°C ) †	Mean temperature of warmest quarter (°C ) †	Mean temperature of coldest quarter (°C) †
AKE	Eagle Summit, Alaska, USA	Subalpine low shrub tundra with Picea (Main)	M1	2011	North America	65.4841	-145.417	1117	216	-8.1	11.2	-26.8
AKE	Eagle Summit, Alaska, USA	Subalpine low shrub tundra with Picea (Main)	M2	2011	North America	65.4842	-145.414	1114	215	-8.1	11.1	-26.8
AKE	Eagle Summit, Alaska, USA	Subalpine low shrub tundra with Picea (Main)	M3	2011	North America	65.4849	-145.416	1116	215	-8.1	11.1	-26.8
WBC	Wood Buffalo National Park, Alberta, Canada	Picea-dominated forest (Main)	M1	2013	North America	59.7181	-111.553	224	357	-2.8	14.6	-22.3
WBC	Wood Buffalo National Park, Alberta, Canada	Picea-dominated forest (Main)	M2	2013	North America	59.7183	-111.552	224	357	-2.8	14.6	-22.3
WBC	Wood Buffalo National Park, Alberta, Canada	Picea-dominated forest (Main)	M3	2013	North America	59.7184	-111.552	221	357	-2.8	14.6	-22.3
WBC	Wood Buffalo National Park, Alberta, Canada	Pinus-dominated forest (Secondary)	S1	2013	North America	59.9579	-111.779	222	354	-3.1	14.4	-22.6
WBC	Wood Buffalo National Park, Alberta, Canada	Pinus-dominated forest (Secondary)	S2	2013	North America	59.9574	-111.779	222	354	-3.1	14.4	-22.6
WBC	Wood Buffalo National Park, Alberta, Canada	Pinus-dominated forest (Secondary)	S3	2013	North America	59.9573	-111.778	222	354	-3.1	14.4	-22.6
WBC	Wood Buffalo National Park, Alberta, Canada	Slave River (Secondary)	S4	2013	North America	59.6266	-111.424	225	356	-2.7	14.7	-22.2
WBC	Wood Buffalo National Park, Alberta, Canada	Slave River (Secondary)	S5	2013	North America	59.6254	-111.425	222	356	-2.7	14.7	-22.2
WBC	Wood Buffalo National Park, Alberta, Canada	Slave River (Secondary)	S6	2013	North America	59.625	-111.425	225	359	-2.8	14.7	-22.3
WBC	Wood Buffalo National Park, Alberta, Canada	Lake (Secondary)	S7	2013	North America	59.8011	-112.011	223	358	-2.8	14.4	-22.2
WBC	Wood Buffalo National Park, Alberta, Canada	Lake (Secondary)	S8	2013	North America	59.801	-112.012	221	358	-2.8	14.4	-22.2
WBC	Wood Buffalo National Park, Alberta, Canada	Lake (Secondary)	S9	2013	North America	59.8009	-112.012	221	358	-2.8	14.4	-22.2
WBC	Wood Buffalo National Park, Alberta, Canada	Salt flat (Secondary)	S10	2013	North America	59.9616	-112.389	221	345	-2.7	14.6	-22.1
ILH	Ives Lake, Huron Mountains, Michigan, USA	Rocky boulder surrounded byTsuga forest with Acer (Main)	M1	2013	North America	46.8576	-87.9207	272	797	4.2	16.7	-9.3
ILH	Ives Lake, Huron Mountains, Michigan, USA	Rocky boulder surrounded byTsuga forest with Acer (Main)	M2	2013	North America	46.8575	-87.921	274	797	4.2	16.7	-9.3
ILH	Ives Lake, Huron Mountains, Michigan, USA	Rocky boulder surrounded byTsuga forest with Acer (Main)	M3	2013	North America	46.8573	-87.9217	277	797	4.2	16.7	-9.3
ILH	Ives Lake, Huron Mountains, Michigan, USA	Picea-dominated forest (Main)	M1	2013	North America	46.8504	-87.9251	286	802	4.1	16.7	-9.5
ILH	Ives Lake, Huron Mountains, Michigan, USA	Picea-dominated forest (Main)	M2	2013	North America	46.8502	-87.9259	285	802	4.1	16.7	-9.5
ILH	Ives Lake, Huron Mountains, Michigan, USA	Picea-dominated forest (Main)	M3	2013	North America	46.8499	-87.9267	285	798	4.2	16.8	-9.3
QUC	Québec, Canada	Picea-dominated forest (Main)	M1	2011	North America	52.4132	-73.0732	457	829	-3.1	12.2	-20.5
QUC	Québec, Canada	Picea-dominated forest (Main)	M2	2011	North America	52.4126	-73.0725	455	829	-3.1	12.2	-20.5
QUC	Québec, Canada	Picea-dominated forest (Main)	M3	2011	North America	52.4132	-73.0713	458	829	-3.1	12.2	-20.5
SWM	Mora, Sweden	Picea-dominated forest (Main)	M1	2012	Eurasia	60.8919	14.3205	264	666	3.9	14.4	-6.2
SWM	Mora, Sweden	Picea-dominated forest (Main)	M2	2012	Eurasia	60.8918	14.3209	259	666	3.9	14.4	-6.2
SWM	Mora, Sweden	Picea-dominated forest (Main)	M3	2012	Eurasia	60.892	14.3216	255	666	3.9	14.4	-6.2
SWM	Mora, Sweden	Open boulder field adjacent to Picea-dominated forest (Secondary)	S1	2012	Eurasia	60.8981	14.3176	237	666	3.9	14.4	-6.2
SWM	Mora, Sweden	Open boulder field adjacent to Picea-dominated forest (Secondary)	S2	2012	Eurasia	60.8949	14.3173	235	666	3.9	14.4	-6.2
SWM	Mora, Sweden	Open boulder field adjacent to Picea-dominated forest (Secondary)	S3	2012	Eurasia	60.8951	14.3172	234	666	3.9	14.4	-6.2
RUS	Stolby Reserve, Krasnoyarsk Territory, Russia	Abies-dominated wet forest (Main)	M1	2012	Eurasia	55.8856	92.771	551	546	-0.7	15.1	-16.8
RUS	Stolby Reserve, Krasnoyarsk Territory, Russia	Abies-dominated wet forest (Main)	M2	2012	Eurasia	55.8859	92.7704	558	546	-0.7	15.1	-16.8
RUS	Stolby Reserve, Krasnoyarsk Territory, Russia	Abies-dominated wet forest (Main)	M3	2012	Eurasia	55.8862	92.7704	551	546	-0.7	15.1	-16.8
RUS	Stolby Reserve, Krasnoyarsk Territory, Russia	Open exposed rocky boulder in mixed forest with Abies and Pinus (Secondary)	S1	2012	Eurasia	55.8903	92.7438	568	550	-0.9	14.8	-17
RUS	Stolby Reserve, Krasnoyarsk Territory, Russia	Open exposed rocky boulder in mixed forest with Abies and Pinus (Secondary)	S2	2012	Eurasia	55.8892	92.7435	593	550	-0.9	14.8	-17
RUS	Stolby Reserve, Krasnoyarsk Territory, Russia	Open exposed rocky boulder in mixed forest with Abies and Pinus (Secondary)	S3	2012	Eurasia	55.888	92.7441	597	550	-0.9	14.8	-17
ERU	Bol'shekhekhtsirskii Reserve, Khabarovsk Territory, Russia	Mountain bald in Picea-mixed forest (Main)	M1	2013	Eurasia	48.2195	134.783	960	841	-3	14.8	-23.3
ERU	Bol'shekhekhtsirskii Reserve, Khabarovsk Territory, Russia	Mountain bald in Picea-mixed forest (Main)	M2	2013	Eurasia	48.2195	134.783	961	841	-3	14.8	-23.3
ERU	Bol'shekhekhtsirskii Reserve, Khabarovsk Territory, Russia	Mountain bald in Picea-mixed forest (Main)	M3	2013	Eurasia	48.2194	134.783	958	841	-3	14.8	-23.3
ERU	Bol'shekhekhtsirskii Reserve, Khabarovsk Territory, Russia	Mountain bald in mixed forest with Abies and Pinus (Secondary)	S1	2013	Eurasia	48.2619	134.897	144	692	1.3	18.9	-19
ERU	Bol'shekhekhtsirskii Reserve, Khabarovsk Territory, Russia	Mountain bald in mixed forest with Abies and Pinus (Secondary)	S2	2013	Eurasia	48.2619	134.897	144	692	1.3	18.9	-19
ERU	Bol'shekhekhtsirskii Reserve, Khabarovsk Territory, Russia	Mountain bald in mixed forest with Abies and Pinus (Secondary)	S3	2013	Eurasia	48.2619	134.897	144	692	1.3	18.9	-19
ERU	Durminskoye forest-hunting area, Khabarovsk Territory, Russia	Stand of Picea with Pinus and Abies in broadleaf forest (Secondary)	S4	2013	Eurasia	47.8163	135.957	329	793	0.5	16.5	-17.9
ERU	Durminskoye forest-hunting area, Khabarovsk Territory, Russia	Stand of Picea with Pinus and Abies in broadleaf forest (Secondary)	S5	2013	Eurasia	47.8165	135.957	330	793	0.5	16.5	-17.9
ERU	Durminskoye forest-hunting area, Khabarovsk Territory, Russia	Stand of Picea with Pinus and Abies in broadleaf forest (Secondary)	S6	2013	Eurasia	47.8167	135.957	328	793	0.5	16.5	-17.9
* In cases where particular taxa or lineages were not found in the main sampling site we collected from nearby areas. These are designated as secondary sites.
** In all sites, plant and lichen material was collected during the summer months (June-August).
† Climate data retrieved from the WorldClim database July, 2016.
