# Supplementary material for: Host availability drives distributions of fungal endophytes in the imperilled boreal realm
Source: Springer Nature journal article supplement (doi:10.1038/s41559-019-0975-2), 2019-09-23
Supplement: MOESM6 [file 41559_2019_975_MOESM6_ESM.xlsx]

## Sheet: Supplementary Table 4
Supplementary Table 4. Panel A: Taxonomy and lifestyle of 693 fungal OTUs from soil (of 44,563), as described by 22, that have significant matches to boreal endophytes based on clustering at 99% sequence similarity. Information about ectomycorrhizal lineages (ecm_lineage) and lifestyle are presented in 22 and may reference either fungi with multiple ecological modes or cryptic species that perfor…
Panel A
OTUid	Representative	Sequence	PlutoF match	98.5% SH of PlutoF match	ecm_lineage	Lifestyle1	Lifestyle2	Kingdom	Phylum	Class	Order	Family	Genus	INSDmatch	Organism
GL44200	IGJRWKL02GJ6Q9	CTAGACTCGTCATCGATGAAGAACGCAGCGAAATGCGATAAGTAGTGTGAATTGCAGAATTCAGTGAATCATCGAATCTTTGAACGCACATTGCGCCCCTTGGTATTCCATGGGGCATGCCTGTTCGAGCGTCATCTACACCCTCAAGCTCTGCTTGGTGTTGGGCGTCTGTCCCGCCTTTGCGCGCGGACTCGCCCCAAATTCATTGGCAGCGGTTGCCTCCTCTCGCGCAGCACAATTGCGTTTCTTGAGGAGTGCGGGCCGCGTCCACGAAGCAACATTACCGTCTTTGACCTCGGATCAGGTAGGGATACCCGCTGAACTTAA	EU516832	SH224142.06FU		Plant pathogen		Fungi	Ascomycota	Dothideomycetes	Botryosphaeriales	Botryosphaeriaceae	Camarosporium	EU516832	uncultured_fungus
GL39807	ID1YYUI01ECMC7	CTAGACTCGTCATCGATGAAGAACGCTGCGAAATGCGATAAGTAATGTGAATTGCAGAATTCAGTGAATCATCGAATCTTTGAACGCACATTGCGCCCCTTGGCATTCCGAGGGGCATGCCTGTTCGAGCGTCATTACAACCCTCAAGCTCTGCTTGGTATTGGGCGCCGTCCTCTCTGCGGACGCGCCTCAAAGACCTCGGCGGTGGCTGTCCAGCCCTCAAGCGTAGTAGAATACACCTCGCTTTGGAGCGGCTGGCGTCGCCCGCCGGACGAACCTTCTGAACTTTTCTCAAGGTTGACCTCGGATCAGGTAGGGATACCCGCTGAACTTAA	JQ239397	SH236108.06FU		Plant pathogen		Fungi	Ascomycota	Dothideomycetes	Botryosphaeriales	Botryosphaeriaceae	Diplodia	JX894204	Diplodia_corticola
GL39265	ID1YYUI01BGCMA	CTAGACTCGTCATCGATGAAGAACGCAGCGAAATGCGATAAGTAATGTGAATTGCAGAATTCAGTGAATCATCGAATCTTTGAACGCACATTGCGCCCCTTGGTATTCCGAGGGGCATGCCTGTCCGAGCGTCATTTCACCAATCAAGCCCAGCTTGGTATTGGGCCTCGTCCGCACAGGACGGGCCTCGAAGACCCCGGCCGCGCGGTCCCGCTTCAGGCGTAGCAGAGCTTTCGCAGCCTCGCCTTGGAAGCCGGCGTCCGTGTCGCGCCGCACAACGAACCCTTTTCTTTCAAGGTTGACCTCGGATCAGGTAGGGATACCCGCTGAACTTAA	AM901816	SH195688.06FU		Plant pathogen		Fungi	Ascomycota	Dothideomycetes	Botryosphaeriales	Botryosphaeriaceae	Dothiorella	AM901875	uncultured_Ascomycota
GL38670	IGJRWKL02ISQC7	CTAGACTCGTCATCGATGAAGAACGCTGCGAAATGCGATAAGTAATGTGAATTGCAGAATTCAGTGAATCATCGAATCTTTGAACGCACATTGCGCCCCTTGGTATTCCGAGGGGCATGCCTGTTCGAGCGTCATTTCAACCCTCAAGCTCTGCTTGGTATTGGGCTCCGTCCTCCGCGGACGCGCCTTAAAGACCTCGGCGGTGGCGTCTTGCCTCAAGCGTAGTAGAAAACACCTCGCTTTGGAGCGCACGGCGTCGCCCGCCGGACGAACCTTTGAATTATTTCTCAAGGTTGACCTCGGATCAGGTAGGGATACCCGCTGAACTTAA	AY615185	SH206852.06FU		Plant pathogen		Fungi	Ascomycota	Dothideomycetes	Botryosphaeriales	Botryosphaeriaceae	Neofusicoccum	JX139035	Guignardia_cryptomeriae
GL42200	ID1YYUI01ALPR3	CTAGACTCGTCAACGATGAAGAACGCAGCGAAATGCGATAAGTAATGTGAATTGCAGAATTCAGTGAATCATCGAATCTTTGAACGCACATTGCGCCCTTTGGCATTCCGAGGGGCATGCCCGTTCGAGCGTCATTACACCACTCAAGCCTGGCTTGGTATTGGGCGTCGGGTCAACCCGCGCCTCCATTGAAAATTCGGCTGTGGTCTGAAACTCATCCCTGCGTCGTGAGAATTTGATTTCCTCTCGCTCGGGTGGGCGGCCGGCACGCCGTTAAACCATTTTATCACAGGTTGACCTCGGATCGGGTAGGGATACCCGCTGAACTTAA	AY559336	SH195035.06FU		Saprotroph		Fungi	Ascomycota	Dothideomycetes	Capnodiales	Capnodiaceae	Capnobotryella	GU174376	uncultured_fungus
GL44215	ID1YYUI01DGNVF	CTTGGTATTCCGGGGGGCATGCCTGTTCGAGCGTCATTACACCCCTCAAGCCTCGCTTGGTGTTGGGCGTCGCGGAGATCCGCGTGCCCCAAACTGCCTCGTGCCCGGCGGGTCGTCCGTCCCCGAGCGTTGTGACATCTCAGTTCGCTCCGGTGGATGCGGCGGCCGCGCCGTTAAACCCCCCTTTCAGGTTGACCTCGGATCAGGTAGGGATACCCGCTGAACTTAA	AY220611	SH222894.06FU		Saprotroph		Fungi	Ascomycota	Dothideomycetes	Capnodiales	Capnodiaceae	Capnobotryella	AY220613	Capnobotryella_renispora
GL47371	ID1YYUI01DTEAY	CTAGACTCGTCATCGATGAAGAACGCTGCGAAATGCGATAAGTAATGTGAATTGCAGAATTCAGTGAATCATCGAATCTTTGAACGCACATTGCGCCCCCTGGTATTCCGGGGGGCATGCCTGTTCGAGCGTCATTTCACCACTCAAGCCTCGCTTGGTTTTGGGCGCCGCGGTCCCCGCGCGCCCCGATGTGAACCGGCCGGGCCGTCCGTCTCCGAGCGTTGTGACATCTCAGTTCGCTCGCGGGGCCGCGACGGTCGGCGCCGTTAAACCTCCTTCTCAGGTTGACCTCGGATCAGGTAGGGATACCCGCTGAACTTAA	AY220611	SH222894.06FU		Saprotroph		Fungi	Ascomycota	Dothideomycetes	Capnodiales	Capnodiaceae	Capnobotryella	DQ068347	fungal_sp_V_G5
GL49289	IGJRWKL02HSDJG	CTAGACTCGTCATCGATGAAGAACGTAGCGAAATGCGATAAGTAATGTGAATTGCAGAATTCAGTGAATCATCGAATCTTTGAACGCACATTGCGCCCTTTGGCATTCCGAAGGGCATGCCCGTTCGAGCGTCATTACACCACTCAAGCCTCGCTTGGTATTGGGCGGCGGGAGTCCCCCGCGCCCCTAATTCATCGGCTGGACGGTTCGAATCTCAGCGTTGTGGTTATTCAAATCGCTGGCGAAGACGACCGGACGTGCCGCTAAAATTCATTACAGGTTGACCTCGGATCGGGTAGGGATACCCGCTGAACTTAA	AY559365	SH195035.06FU		Saprotroph		Fungi	Ascomycota	Dothideomycetes	Capnodiales	Capnodiaceae	Capnobotryella	JQ312879	uncultured_fungus
GL49619	IJOVCJS01AHIGF	CTAGACTCGTCATCGATGAAGAACGTGGCGAAATGCGATAAGTAATGTGAATTGCAGAATTCAGTGAATCATCGAATCTTTGAACGCACATTGCGCCCTTTGGCATTCCGAAGGGCATGCCCGTTCGAGCGTCATTACACCAATCAAGCCTGGCTTGGTATTGGGCGTCGGGAGACCCCGCGCCCTCAATTCATCGGCTGGACGGTTCGATTCTCAGCGTTGTGGTCATTCAATTCGCTGGCGAGGACGACTGGACGCGCCGTTAAACCTCTATCACAGGTTGACCTCGGATCGGGTAGGGATACCCGCTGAACTTAA	AY559365	SH195035.06FU		Saprotroph		Fungi	Ascomycota	Dothideomycetes	Capnodiales	Capnodiaceae	Capnobotryella	DQ068356	fungal_sp_V_F6
GL38908	ID03IXK02HRMBX	ACTCGTGACGCGTCATCGATGAAGAACGCTGCGAAATGCGATAAGTAATGTGAATTGCAGAATTCAGTGAATCATCGAATCTTTGAACGCACATTGCGCCCCCTGGTATTCCGGGGGGCATGCCTGTTCGAGCGTCATTTCACCACTCAAGCCTCGCTTGGTATTGGGCAACGCGGTCCGCCGCGTGCCTCAAATCGACCGGCTGGGTCTTCTGTCCCCTAAGCGTTGTGGAAACTATTCGCTAAAGGGTGTTCGGGAGGCTACGCCGTAAAACAACCCCATTTCTAAGGTTGACCTCGGATCAGGTAGGGATACCCGCTGAACTTAA	KC329631	SH196750.06FU		Saprotroph		Fungi	Ascomycota	Dothideomycetes	Capnodiales	Davidiellaceae	Cladosporium	GQ999135	uncultured_fungus
GL47844	IGJRWKL02J2V48	CTAGACTCGTCACCGATGAAGAACGCAGCGAAATGCGATAAGTAATGTGAATTGCAGAATTCAGTGAATCATCGAATCTTTGAACGCACATTGCGCCCTTTGGTATTCCGAAGGGCATGCCTGTTCGAGCGTCATTTCACCACTCAAGCCTGGCTTGGTATTGGGCGTCGCGGCTCCGCGCGCCTTAAAGTCTCCGGCTGAGCCATTCGTCTCTAAGCGTTGTGGATTTTCTAATTCGCTTCGGAGTGCGGGTGGCCGCGGCCGTTAAATCTTTATTCAAAGGTTGACCTCGGATCAGGTAGGGATACCCGCTGAACTTAA	DQ303090	SH212658.06FU		Plant pathogen		Fungi	Ascomycota	Dothideomycetes	Capnodiales	Mycosphaerellaceae	Mycosphaerella	JN225929	Mycosphaerella_sp_1_ICMP_18817
GL49421	ID1YYUI01EP6GB	CTAGACTCGTCAACGATGAAGAACGCAGCGAAATGCGATAAGTAATGTGAATTGCAGAATTCAGTGAATCATCGAATCTTTGAACGCACATTGCGCCCCGTGGTATTCCGCGGGGCATGCCCGTTCGAGCGTCATTTCACCACTCAAGCCTAGCTTGGTATTGGGCGTCGCGGTTCCGCGCGCCTTAAAGTCTCCGGCTGAGCAGTTCGTCTCTAAGCGTTGTGGCATATATTTCGCTGAAGAGTTCGGACGGCCTTTGGCCGTTAAATCTTTCTTAAGGTTGACCTCGGATCAGGTAGGGATACCCGCTGAACTTAA	EU851915	SH212657.06FU		Plant pathogen		Fungi	Ascomycota	Dothideomycetes	Capnodiales	Mycosphaerellaceae	Mycosphaerella	JQ971968	Mycosphaerella_aurantia
GL41263	ID1YYUI02HDDV7	CTAGACTCGTCATCGATGAAGAACGCGGCGAAATGCGATAAGTAATGTGAATTGCAGAATTCAGTGAATCATCGAATCTTTGAACGCACATTGCGCCCCCTGGCATTCCGGGGGGCATGCCTGTTCGAGCGTCATTACACCACTCAAGCCTGGCTTGGTATTGGAGGTCGCGGTCCGCCGCGCCTCCTAATGTCGCCGGCCGAGTCGTCTGTCTCCGAGCGTTGTGAATCTTCAATTCGCTTTCGAGTACAGGCGGCGCGCGCCGTTAAACCTCTTTTTCAGGTTGACCTCGGATCAGGTAGGGATACCCGCTGAACTTAA	FJ948141	SH195092.06FU		Plant pathogen		Fungi	Ascomycota	Dothideomycetes	Capnodiales	Mycosphaerellaceae	Pseudocercosporella	KC339227	Pseudocercosporella_fraxini
GL26711	ID1YYUI01ALYTQ	CTAGACTCGTCACCGATGAAGAACGCAGCGAAATGCGATAAGTAGTGTGAATTGCAGAATTCAGTGAATCATCGAATCTTTGAACGCACATTGCGCCCCTTGGTATCCCAGGGGGCATGCCTGTTCGAGCGTCATTTCTACTATTCAAGCTTTGCTTGGTTTTGAATATATTGTAGTACTTTTAAATAGTTATACATATTCTAAATATAGACGGCAGCAAGTATAAGTTCTAAGCGTAGCAGTAAAACATTTCGCTTTTATACTTATATTTTGTTAAACCGAAATAAAGTATATTTACAGTTTGACCTCGGATCAGGCAGGGATACCCGCTGAACTTAA	EU726287	SH229757.06FU				Fungi	Ascomycota	Dothideomycetes	Capnodiales	Mycosphaerellaceae		EU726295	uncultured_Lophium
GL32339	ID1YYUI01BOLXO	CTAGACTCGTCACCGATGAAGAACGCAGCGAAATGCGATAAGTAGTGTGAATTGCAGAATTCAGTGAATCATCGAATCTTTGAACGCACATTGCGCCCCTCGGTATCCCGGGGGGCATGCCTGTTCGAGCGTCATTTCTACCATTCAAGCTTGCTTGGTTTTGGGTATTGTAGCACTCTTAATTTAGGGGTCTACATATCTTAAATGTAGACGGCAGCAAGTATAAGTTCTGAGCGTAGCAGTAATAACATTTCGCTTTTAGAAACTATATTTGTTAACCGGAAAAGTATATTTACAGTTTGACCTCGGATCAGGCAGGGATACCCGCTGAACTTAA	FJ475767	SH218155.06FU				Fungi	Ascomycota	Dothideomycetes	Capnodiales	Mycosphaerellaceae		JF300738	uncultured_fungus
GL33520	ID03IXK02F7MGY	CTAGACTCGTCATCGATGAAGAACGCTGCGAAATGCGATAAGTAGTGTGAATTGCAGAATTCAGTGAATCATCGAATCTTTGAACGCACATTGCGCCCCTTGGTATCCCGGGGGGCATGCCTGTTCGAGCGTCATTTCTACCATTCAAGCTTTGCTTGGTTTTGGGTATTGTAGCACTCTTAACCTGGAGTTTTACATATCTTAAATGTAGACGGCAGCAAGTATATTAGTTCTGAGCGTAGCAGTAATAAATTTCGCTTTTAGAAACTATATTTGTTAACCAGAAAAGTATATTTACAGTTTGACCTCGGATCAGGCAGGGATACCCGCTGAACTTAA	DQ309176	SH218156.06FU				Fungi	Ascomycota	Dothideomycetes	Capnodiales	Mycosphaerellaceae		JF300727	uncultured_fungus
GL49021	ID1YYUI01CKBNM	CTAGACTCGTCATCGATGAAGAACGCTGCGAAATGCGATAAGTAATGTGAATTGCAGAATTCAGTGAATCATCGAATCTTTGAACGCACATTGCGCCCTTTGGCATTCCGAAGGGCATGCCCGTTCGAGCGTCATTACACCCCTCAAGCCTGGCTTGGTATTGGGCGACGGCAGTCTGCCGCGCCTCGAAGTGATCGGCTGGACGGTTTGAATCTCAGCGTTGTGGTTTCATCAATTCGCTGGCGAGGACGACCGGACGCGCCGTTAAACCTCACCAAAGGTTGACCTCGGATCGGGTAGGGATACCCGCTGAACTTAA	EF592087	SH195036.06FU		Plant pathogen		Fungi	Ascomycota	Dothideomycetes	Capnodiales	Teratosphaeriaceae	Devriesia	HQ433007	uncultured_Ascomycota
GL49370	IGJRWKL02F3L5L	CTAGACTCGTCATCGATGAAGAACGTAGCGAAATGCGATAAGTAATGTGAATTGCAGAATTCAGTGAATCATCGAATCTTTGAACGCACATTGCGCCCTCTGGCATTCCGGGGGGCATGCCCGTTCGAGCGTCATTAACACCCATCAAGCCTGGCTTGGTCTTGGGCGACGGGATCTCCCCGCGCCCCGATTTCGCCGGCTGGACGACCCCGATCTCTCAAGCGTTGTACAGTCTCGCTAGTCAGACGGGCAGCCACGCCGTTAAATATCAATCAATAAGTTGACCTCGGATCGGGTAGGAATACCCGCTGAACTTAA	KC978010	SH215035.06FU		Plant pathogen		Fungi	Ascomycota	Dothideomycetes	Capnodiales	Teratosphaeriaceae	Devriesia	JF691121	uncultured_Capnodiales
GL49402	ID1YYUI01DZKPM	CTAGACTCGTCATCGATGAAGAACGCAGCGAAATGCGATAAGTAATGTGAATTGCAGAATTCAGTGAATCATCGAATCTTTGAACGCACATTGCGCCCTCTGGCATTCCGGGGGGCATGCCCGTTCGAGCGTCATTAACACCCATCAAGCCTGGCTTGGTATTGGGCGTCGGGGATTCCCCGCGCCCCGATTTCGCCGGCTGGACGACCCCGATCTCTCAAGCGTTGTACAATCTCGCTGGGCAGGCGGGCGGCCACGCCGTTAACCCCAATCAAACAAGTTGACCTCGGATCGGGTAGGAATACCCGCTGAACTTAA	KC978010	SH215035.06FU		Plant pathogen		Fungi	Ascomycota	Dothideomycetes	Capnodiales	Teratosphaeriaceae	Devriesia	JF691121	uncultured_Capnodiales
GL49766	ID1YYUI01CWB6H	CTAGACTCGTCATCGATGAAGAACGCTGCGAAATGCGATAAGTAATGTGAATTGCAGAATTCAGTGAATCATCGAATCTTTGAACGCACATTGCGCCCTCTGGCATTCCGGGGGGCATGCCCGTTCGAGCGTCATTAACACCCATCAAGCCTGGCTTGGTATTGGGCGTCGGGACCTCCCCGCGCCCCGATTTCGCCGGCTGGACGACCCCGATCTCAAGCGTTGTGATGAATCTCGCTGGAGGGACGGGCGGCCACGCCGTTAACCTCGTAATCAAAGTTGACCTCGGATCGGGTAGGAATACCCGCTGAACTTAA	KC978010	SH215035.06FU		Plant pathogen		Fungi	Ascomycota	Dothideomycetes	Capnodiales	Teratosphaeriaceae	Devriesia	JF691083	uncultured_Capnodiales
GL45854	ID1YYUI01DDQZK	CTAGACTCGTCATCGATGAAGAACGCAGCGAAATGCGATAAGTAATGTGAATTGCAGAATTCAGTGAATCATCGAATCTTTGAACGCACATTGCGCCCTCTGGTATTCCGGGGGGCATGCCTGTTCGAGCGTCATTACACCAGTCCAGCCTCGCTGGGTCTTGGGCGTCGCGGCCCGCCGCGCGCCCCAATGTCTCCGGCTGAGCCGTCCGTCTCGAAGCGTTGTGGCAACCCAAATCGCTTGCGGGATCGGAGGGTTTGACGCCGTCCAAACACACCACACCAGGTTGACCTCGGATCAGGTAGGGATACCCGCTGAACTTAA	FM200486	SH238952.06FU		Plant pathogen		Fungi	Ascomycota	Dothideomycetes	Capnodiales	Teratosphaeriaceae	Friedmanniomyces	FR682446	uncultured_Ascomycota
GL43277	IGJRWKL02FVS2B	CTAGACTCGTCACCGATGAAGAACGCAGCGAAATGCGATAAGTAATGTGAATTGCAGAATTCAGTGAATCATCGAATCTTTGAACGCACATTGCGCCCTTTGGCATTCCGAGGGGCATGCCTGTTCGAGCGTCATTACACCACTCAAGCCTGGCTTGGTATTGGGCGGCGGGGAGAGTCCCGCGCCTCAAAGTCATCGGCTGGACGGTACCGTATCCCAGCGTTGTGAAATATCGCTTATGAATACGGGCCGCCCGCGCCGTTAAAACTTCCCGTCACAAGGAAACCAAGGTTGACCTCGGATCAGGTAGGGATACCCGCTGAACTTAA	JF499846	SH238961.06FU		Plant pathogen		Fungi	Ascomycota	Dothideomycetes	Capnodiales	Teratosphaeriaceae		JF499844	Teratosphaeria_cf_bellula_CPC_18280
GL47164	IGJRWKL02I2RJI	CTAGACTCGTCATCGATGAAGAACGCTGCGAAATGCGATAGGTAATGTGAATTGCAGAATTCAGTGAATCATCGAATCTTTGAACGCACATTGCGCCCTCTGGCATTCCGGGGGGCATGCCCGTTCGAGCGTCATTAAAACTCTTCAAGCCTCGCTTGGTATTGGGTGCCGGGACCTTCCCGCGCCTCGATTTCGCCGGCTGACCTACTCAACAACTCCAGCGTAGTAGTATAAACCTTCGCTAGGGTGATGGGGTGGCAGGGCCGTTCAAATCATTAACAAAGTTGACCTCGGATCGGGTAGGAATACCCGCTGAACTTAA	AM999562	SH215034.06FU		Plant pathogen		Fungi	Ascomycota	Dothideomycetes	Capnodiales	Teratosphaeriaceae		JF691083	uncultured_Capnodiales
GL48312	ID1YYUI02JEIRZ	CTAGACGCGTCATCGATGAAGAACGCTGCGAAATGCGATAAGTAATGTGAATTGCAGAATTCAGTGAATCATCGAGTTTTTGAACGCACACTGCGCCCCTTGGTATTCCGGGGGGCATGCCCGTTCGAGCGTCATTACACCCATCGAGCCTGGCTCGGTATTGGATCCCGGGGGTGACCCGGATCCCAAAAGTCGTCGGCTGGACAGCTCTGATCTCCGCGTCGTGGAATCCATTCGCAGACGAGATGGGCGTCCCAAGCCAAGCAAAACATCCATTCAAGGTTGACCTCGGATCGGGTAGGAATACCCGCTGAACTTAA	GU187874	SH195241.06FU				Fungi	Ascomycota	Dothideomycetes	Capnodiales			GU187874	uncultured_fungus
GL02256	ID1YYUI01AZN68	CTAGACTCGTCATCGATGAAGAACGCTGCGAAATGCGATAAGTAATGTGAATTGCAGAATTCAGTGAATCATCGAATCTTTGAACGCACATTGCGCCCCTTGGCATTCCGAGGGGCATGCCCGTTCGAGCGTCATTAAATCCAATCAAGCCTGGCTTGGTATTGGGCGTCGGGGTCCCCCGCGCCTCAATTTCACCGGCTGGCCGTCGCCCGTCTTAGCGTTGTGACACACTTCTCGCTACCGATGGGACCGGACCACGCCGTCAAAACCCCTACGAATTTCAATCGAAATTCGATTAAGGTTGACCTCGGATCGGGTAGGAATACCCGCTGAACTTAA	DQ309153	sequence missing from global key				Fungi	Ascomycota	Dothideomycetes	Capnodiales			HM069372	uncultured_fungus
GL37225	ID1YYUI01DRQZJ	CTAGACTCGTCACGATGAAGAACGCTGCGAAATGCGATAAGTAATGTGAATTGCAGAATTCAGTGAATCATCGAATCTTTGAACGCACATTGCGCCCCCTGGCATTCCGGGGGGCATGCCCGTTCGAGCGTCATTAAATCCAATCAAGCCTAGCTTGGTATTGGGCGTCGGGAGCTCCCCGTGCTTCAATTTCACCGGCTGGCCGTCGCCCGTCTTAGCGTTGTGACACACTTCTCGCTAGCGATGGAGGCGGACCACGCCGTTAGAACCCCCTAAATTTCACATCGAAATTTGATCAAGGTTGACCTCGGATCGGGTAAGAATACCCGCTGAACTTAA	DQ309153	sequence missing from global key				Fungi	Ascomycota	Dothideomycetes	Capnodiales			JF691084	uncultured_Capnodiales
GL48553	ID1YYUI01CQP39	CTAGACTCGTCATCGATGAAGAACGTAGCGAAATGCGATAAGTAATGTGAATTGCAGAATTCAGTGAATCATCGAATCTTTGAACGCACATTGCGCCCTCTGGCATTCCGGGGGGCATGCCCGTTCGAGCGTCATTAAAACCCATCAAGCCTGGCTTGGTATTGGGCGACGGGACCTCCCCGCGCCCCGATTTCGTCGGCTAGACGACTGCGGTCTCTCAAGCGTTTGTGTAAAATCTCGGTTGTTAGACGGGCGTCGGGCCGTTAAACACTTCTAATCAAGTTGACCTCGGATCGGGTAGGAATACCCGCTGAACTTAA	KC978010	SH215035.06FU				Fungi	Ascomycota	Dothideomycetes	Capnodiales			JF691110	uncultured_Capnodiales
GL48922	IGJRWKL02HBYN1	CTAGACTCGTCATCGATGAAGAACGTAGCGAAATGCGATAAGTAATGTGAATTGCAGAATTCAGTGAATCATCGAGTTTTTGAACGCACACTGCGCCCCTTGGTATTCCGGGGGGCATGCCCGTTCGAGCGTCATTACACCCATCGAGCCTGGCTCGGTATTGGACCCCGGGGGTGACCCGGATCCCAAAGTCGTCGGCTGGACAGCTCTGATCTCCGCGTCGTGGAATCCATTCGCAGACGAGATGGGCGTCCCAAGCCAAGCAAAACATCCATTCAAGGTTGACCTCGGATCGGGTAGGAATACCCGCTGAACTTAA	GU187874	SH195241.06FU				Fungi	Ascomycota	Dothideomycetes	Capnodiales			GU187874	uncultured_fungus
GL24695	IGJRWKL02JKWWR	CTAGACTCGTCATCGATGAAGAACGTGGCGAAATGCGATAAGTAATGTGAATTGCAGAATTCAGTGAATCATCGAATCTTTGAACGCACATTGCGCCCCTTGGTATTCCGAGGGGCATGCCTGTTCGAGCGTCATTACACCACTCAAGCTATGCTTGGTATTGGGCGTCGTCCTTAGTTGGGCGCGCCTTAAAGACCTCGGCGAGGCCACTCCGGCTTTAGGCGTAGTAGAATTTATTCGAACGTCTGTCAAAGGAGAGGAACTCTGCCGACTGAAACCTTTATTTTTCTAGGTTGACCTCGGATCAGGTAGGGATACCCGCTGAACTTAA	JF440584	SH206629.06FU		Saprotroph		Fungi	Ascomycota	Dothideomycetes	Dothideales	Dothioraceae	Aureobasidium	KC544477	Aureobasidium_pullulans
GL37221	IGJRWKL02JXIMR	CTAGACTCGTCACCGATGAAGAACGCAGCGAAATGCGATAAGTAATGTGAATTGCAGAATTCAGTGAATCATCGAATCTTTGAACGCACATTGCGCCCGCTAGTACTCTAGCGGGCATGCCTGTTCGAGCGTCATTTCAACCCTCAAGCCCTGCTTGGTGTTGGGGCCCTACGGCTGCCGTAGGCCCTGAAAGGAAGTGGCGGGCTCGCTACAACTCCGAGCGTAGTAATTCATTATCTCGCTTAGGGTGTTGTGCGGTGCTCCAGCCGTTAAAGACCATCTTTAACTCAAGGTTGACCTCGGATCAGGTAGGAATACCCGCTGAACTTAA	EF419999	SH226453.06FU		Saprotroph		Fungi	Ascomycota	Dothideomycetes	Dothideales	Dothioraceae	Aureobasidium	HQ637297	Aureobasidium_pullulans
GL33338	ID03IXK02GUDX7	CTAGACTCGTCATCGATGAAGAACGTAGCGAAATGCGATAAGTAATGTGAATTGCAGAATTCAGTGAATCATCGAATCTTTGAACGCACATTGCGCCCCTTGGTATTCCGAGGGGCATGCCTGTTCGAGCGTCACCACACCACTCAAGCACCGCTTGGTATTGGGCACTCGTCCGCCGAAAGGCGGGCGTGCCTCGAAGACCTCGGCGGGGTTTCTCCAACTTCGGGCGTAGTAGAGTTAAATCAAAACGTCTTATAAGCTTGGTGAGATCTCATTGCCGTTAAACCTTTTATTTTACAGGTTGACCTCGGATCAGGTAGGGATACCCGCTGAACTTAA	AY616200	SH231447.06FU		Saprotroph		Fungi	Ascomycota	Dothideomycetes	Dothideales	Dothioraceae	Hormonema	HM240818	uncultured_Endoconidioma
GL32416	IGJRWKL02IKF1T	CTAGACTCGTCATCGATGAAGAACGCAGCGAAATGCGATAAGTAATGTGAATTGCAGAATTCAGTGAATCATCGAATCTTTGAACGCACATTGCGCCCCTTGGTATTCCGAGGGGCATGCCTGTTCGAGCGTCATTACACCACTCAAGCATCGCTTGGTATTGGGAACGGTCCGTCGAAAGGCGGGCCTTCCTCGAAGACCTCGGCGGGGTTCAACCGACTTCGGGCGTAGTAGAGTTAAATCGAACGTCTTATAAGCTTGGTCGGATCTCATTGCCGTTAAACCTTTAAATTTTCTAGGTTGACCTCGGATCAGGTAGGGATACCCGCTGAACTTAA	AY805563	SH231446.06FU		Saprotroph		Fungi	Ascomycota	Dothideomycetes	Dothideales	Dothioraceae	Sydowia	JQ780656	Sydowia_polyspora
GL34208	ID1YYUI01CKSRW	CTAGACTCGTCACCGATGAAGAACGCAGCGAAATGCGATAAGTAATGTGAATTGCAGAATTCAGTGAATCATCGAATCTTTGAACGCACATTGCGCTCCCTGGTATTCCGGGGAGCATGCCTGTTCGAGCGTCATTACACCACTCAAGCACTGCTTGGTATTAGGCCATCGTCCCCCGCAAGGTGGGCGTGCCTCAAACACCTCGGCGGAGCCTCACCGGCTTTGGGCGTAGTAGAATTTCTCAACGTCTTATAAGTACCGGTCTGACTCTTTTGCCGCTAAACACCAAACTTTTAAAGGTTGACCTCGGATCAGGTAGGGATACCCGCTGAACTTAA	AY971696	SH231451.06FU				Fungi	Ascomycota	Dothideomycetes	Dothideales		Celosporium	HM240804	uncultured_Dothideales
GL50030	ID03IXK02HTGY4	CTAGATCGTCATCGATGAAGAACGCAGCGAAATGCGATAAGTAATGTGAATTGCAGAATTCAGTGAATCATCGAATCTTTGAACGCACATTGCGCCCCCTGGTATTCCGGGGGGCACGCCTGTTCGAGCGCCATTTCAACCCTCAAGCCTCGCTTGGTGATGGGCCCCGCCCAAGGGCGGGCCCGAAACCCGTAGGCGTCGACGACCGGCTCCAAGCGTAGCAAGACCCTCGCTTGGGTGCCCGGCCGGCGGCCGCCCGGACGAAACTTTCACAAGGTTGGCCTCGGATCAGGCGGGGATACCCGCTGAACTTAA	AY969479	SH195930.06FU				Fungi	Ascomycota	Dothideomycetes	Dothideales			JX915476	uncultured_fungus
GL40319	IGJRWKL02F68MT	CTAGACTCGTCATTCGATGAAGAACGTGGCGAAATGCGATAAGTAGTGTGAATTGCAGAATTCAGTGAATCATCGAATCTTTGAACGCACATTGCGCCCCTTGGTATCCCGAGGGGCATGCCTGTTCGAGCGTCATTTCACCACTCAAGCCTGGCTTGGTGTTGGGCGACGTCCCCTTTGGGGATGCGCCTCGAAACGCTCGGCGGCGTGGCACCGGCTTTAAGCGTAGCAGAATCTTTCGCTTTGAAAGTCGGGGCCCCGTCTGCCGGAAGACCTACTCGCAAGGTTGACCTCGGATCAGGCAGGGATACCCGCTGAACTTAA	DQ179119	SH196545.06FU	cenococcum	EcM		Fungi	Ascomycota	Dothideomycetes	Hysteriales	Gloniaceae	Cenococcum	JX316438	uncultured_fungus
GL47994	ID1YYUI01BQUB5	CTAGACTCGTCATCGATGAAGAACGCAGCGAAATGCGATAAGTAGTGTGAATTGCAGAATTCAGTGAATCATCGAATCTTTGAACGCACATTGCGCCCCTTGGTATCCCGAGGGGCATGCCTGTTCGAGCGTCATTTCACCATTCAAGCCTGGCTTGGTGTTGGGCGACGTCCCTTTCGGGGACGCGCTTCGAAATGCTCGGCGGCGTGGCACCAGCTTTAAGCGTAGCAGAATCTTTCGCTTTGAAAGTCGGGGCCCCGTCTGCCGGAAAACCTACTCAAGGTTGACCTCGGATCAGGTAGGGATACCCGCTGAACTTAA	EU057079	SH196545.06FU	cenococcum	EcM		Fungi	Ascomycota	Dothideomycetes	Hysteriales	Gloniaceae	Cenococcum	HM189732	Cenococcum_geophilum
GL45918	ID1YYUI01C4C86	TGAATCATCGAATCTTTGAACGCACATTGCGCCCCTTGGTATCCCGAGGGGCATGCCTGTTCGAGCGTCATTTCACCACTCAAGCCTGGCTTGGTGTTGGGCGACGTCCCCTTCACGGGACGCGCCTTGAAATGCTCGGCGGCGTGGCACCGGCTTTAAGCGTAGCAGAAACTTTCGCTTTGAAAGTTGGGGCCCCGTCTGCCGGAAGACCTACTTTTAAGGTTGACCTCGGATCAGGCAGGGATACCCGCTGAACTTAA	AY561221	SH196554.06FU		Saprotroph		Fungi	Ascomycota	Dothideomycetes	Hysteriales	Gloniaceae		FJ554060	Uncultured_Cenococcum
GL03246	ID1YYUI01D0GRN	CTAGACTCGTCATCGATGAAGAACGCTGCGAAATGCGATAAGTAATGTGAATTGCAGAATTCAGTGAATCATCGAATCTTTGAACGCACATTGCGCCCCCTGGTATTCCGGGGGGCACACCTGTTCGAGCGCCATTTCAACCCTCAAGCCCGGCTTGGTGATGGGCCCCGCCCGCGGGCGGGCCCGAAACTCGCAGGCGTCACCGTCCTGGCCTCAAGCGTAGCAAAACCCTCGCTTGGATGCCCGGGTGGCGGCCGCCCTGGAACGATTTTTATTTACAAGGTTGGCCTCGGATCAGGTGGGGATACCCGCTGAACTTAA	EU449953	SH195932.06FU		Saprotroph		Fungi	Ascomycota	Dothideomycetes	Microthyriales	Microthyriaceae	Sympodiella	HM069370	uncultured_fungus
GL33180	ID1YYUI02I389P	GACTCGTCAACGATGAAGAACGCAGCGAAATGCGATAAGTAATGTGAATTGCAGAATTCAGTGAATCATCGAATCTTTGAACGCACATTGCGCCCCTTGGTATTCCGAGGGGCATGCCTGTTCGAGCGTCATTTCACCAATCAAGCCCCGCTTGGTATTAGGCGTCAGGCCCGCGCTTCGGCCGCGGGCCCGCCCGAAATGCATCGGCGAGGACATCGACCCCCGGCGTGTTGAGAATTCACGTTCGACGTCGGGAGCACCGGTGCGCCTCCGCCGCGGAAGCCTTTCCGGAAAACACAATTTTTCAAAGGTTGACCTCGGATCAGGTAGGAATACCCGCTGAACTTAA	AY826762	SH210168.06FU		Plant pathogen		Fungi	Ascomycota	Dothideomycetes	Myriangiales	Elsinoaceae	Elsinoe	HM595525	Elsinoaceae_sp_ZLY_2010b
GL35671	ID1YYUI01AI9M0	CTAGACTCGTCATCGATGAAGAACGCAGCGAAATGCGATAAGTAATGTGAATTGCAGAATTCAGTGAATCATCGAATCTTTGAACGCACATTGCGCCCCTTGGTATTCCGGGGGGCATGCCTGTTCGAGCGTCATTACACCAATCAAGCACAGCTTGGCATTAGGCCCATTCGTCCGCCGTCAAACGCGGGCGGGCCTCAAACCTTTCGGCGGAGTCAATCCGGCTTCGGGCGTAGCAGAATCTGTCAAAACGTCCGTGTGGCCGGGTGGTCTTCAGCCGCCAAACCCCATACCATTTTTTAAAGGTTGACCTCGGATCAGGTAGGAATACCCGCTGAACTTAA	EU304350	SH210474.06FU		Saprotroph		Fungi	Ascomycota	Dothideomycetes	Myriangiales		Endosporium	HM164580	uncultured_fungus
GL39271	ID1YYUI01DSM8K	CTAGACTCGTCATCGATGAAGAACGTAGCGAAATGCGATAAGTAGTGTGAATTGCAGAATTCAGTGAATCATCGAATCTTTGAACGCACATTGCGCCCCTTGGTATTCCATGGGGCATGCCTGTTCGAGCGTCATTTGTACCCTCAAGCTCTGCTTGGTGTTGGGTGTTTGTCCCGCCATTTTTGCGTGTGGACTCGCCTTAAAGCGATTGGCAGCCGGCATATTGGCCTTGGAGCGCAGCACATTTTGCGCTTCTAGTCAATGATTGTTGGTATCCAGCAAGTACAAATTCTAACTTTTGACCTCGGATCAGGTAGGGATACCCGCTGAACTTAA	GU931726	SH240081.06FU		Saprotroph		Fungi	Ascomycota	Dothideomycetes	Pleosporales	Cucurbitariaceae	Pyrenochaetopsis	GU931726	uncultured_fungus
GL40194	IGJRWKL02HUDUU	CTAGACTCGTCATCGATGAAGAACGCAGCGAAATGCGATAAGTAGTGTGAATTGCAGAATTCAGTGAATCATCGAATCTTTGAACGCACATTGCGCCCCTTGGTATTCCATGGGGCATGCCTGTTCGAGCGTCATTTGTACCCTCAAGCTCTGCTTGGTGTTGGGTGTTTGTCCCGCCTTTGGTGCGTGGACTCGCCTCAAAATAATTGGCAGCCGGCATATTGGCCTTGGAGCGCAGCACATTTTGCGCTTCTAGTCAATGATTGTTGGCGTCCAGCAAGTACAAATCTCAACTTTTGACCTCGGATCAGGTAGGGATACCCGCTGAACTTAA	JF449521	SH240072.06FU		Saprotroph		Fungi	Ascomycota	Dothideomycetes	Pleosporales	Cucurbitariaceae	Pyrenochaetopsis	JF449521	uncultured_Pezizomycotina
GL48992	IGJRWKL02HCQV8	CTAGACTCGTCATCGATGAAGAACGCTGCGAAATGCGATAAGTAGTGTGAATTGCAGAATTCAGTGAATCATCGAATCTTTGAACGCACATTGCGCCCCTTGGTATTCCATGGGGCATGCCTGTTCGAGCGTCATTTGTACCTTCAAGCTTTGCTTGGTGTTGGGTGTTTGTCCCGAGGGACTCGCCTTAAAGTAATTGGCAGCCAGTGTTTGGTTTTGAAGCGCAGCACAAGTCGCGATTCAAGACTACACGCCCGCTTCCACAAGCCTTTTTCACTTTTGACCTCGGATCAGGTAGGGATACCCGCTGAACTTAA	HQ713778	SH196178.06FU		Plant pathogen		Fungi	Ascomycota	Dothideomycetes	Pleosporales	Didymellaceae	Phoma	AB693786	fungal_sp_B85_14
GL43603	IJOVCJS01C7EII	CTAGACTCGTCAACGATGAAGAACGCAGCGAAATGCGATAAGTAGTGTGAATTGCAGAATTCAGTGAATCATCGAATCTTTGAACGCACATTGCGCCCCTTGGTATTCCATGGGGCATGCCTGTTCGAGCGTCATTTGTACCCTCAAGCTTTGCTTGGTGTTGGGTGTTTGTCTTTTCCACGCGATTAGACTCGCCTTAAAATAATTGGCAGCCAGTGTTTTGGTTTTGAAGCGCAGCACAAGTCGCGATTCAGCTTATATCACTAGTTTCCATTAAGCATCTTATCACTTTTGACCTCGGATCAGGTAGGGATACCCGCTGAACTTAA	AM901675	SH230794.06FU		Plant pathogen		Fungi	Ascomycota	Dothideomycetes	Pleosporales	Didymellaceae	Phoma	HM589351	Phoma_sp_BEA_2010
GL44718	ID1YYUI01CPWQA	CTAGACTCGTCAACGATGAAGAACGCAGCGAAATGTGATAAGTAGTGTGAATTGCAGAATTCAGTGAATCATCGAATCTTTGAACGCACATTGCGCCCCTTGGTATTCCATGGGGCATGCCTGTTCGAGCGTCATTTGTACCCTCAAGCTCTGCTTGGTGTTGGGTGGTTGTCTCTGCTCTGCTTAGACTCGCCCTAAATATATTGGCAGCCGGTATATTGGTTTGAAGCGCAGCACAATTGCAATTTGAGCCTATATTACTGGTATCCATTAAGCAAATTATCACTTTTGACCTCGGATCAGGTAGGGATACCCGCTGAACTTAA	FJ820772	SH227803.06FU		Plant pathogen		Fungi	Ascomycota	Dothideomycetes	Pleosporales	Didymellaceae	Phoma	HQ631048	Phoma_sp_2_TMS_2011
GL42796	ID1YYUI01B8GZW	CTAGACTCGTCAACGATGAAGAACGCAGCGAAATGCGATAAGTAGTGTGAATTGCAGAATTCAGTGAATCATCGAATCTTTGAACGCACATTGCGCCCCTTGGTATTCCATGGGGCATGCCTGTTCGAGCGTCATTTGTACTCTCAAGCTCTGCTTGGTGTTGGGTGTTTGTCTCTACTCTACGTATAGACTCGCCTTAAAAAGATTGGCAGCCGGCATATTGTCTTGGAGCGCAGCACATTTTGCGTCCCTTGCTTTGTTGTTAGCATCCAGTAAGCGACTACATTTGCTCTTGACCTCGGATCAGGTAGGGATACCCGCTGAACTTAA	AY843132	SH240080.06FU				Fungi	Ascomycota	Dothideomycetes	Pleosporales	Leptosphaeriaceae		JQ346923	uncultured_Ochrocladosporium
GL43274	IGJRWKL02GJCH7	CTAGACTCGTCACCGATGAAGAACGCAGCGAAATGCGATAAGTAGTGTGAATTGCAGAATTCAGTGAATCATCGAATCTTTGAACGCACATTGCGCCCCTTGGTATTCCATGGGGCATGCCTGTTCGAGCGTCATTTGTATCTTAAGCTCTGCTTAGTGTTGGGTGATTGTCTACGTCTAATGTAGACTCGCCTTGAATCAATTGGCCGCCGATAGTCTAGTATGCGAGCGCAGCACATTTGCGCACTGTACCCGTCTAATCGGCCACCATCAAGTACAATACCTCCACGTTTGACCTCGGATCAGGTAGGGATACCCGCTGAACTTAA	JF740245	SH228251.06FU				Fungi	Ascomycota	Dothideomycetes	Pleosporales	Leptosphaeriaceae		JX915590	uncultured_fungus
GL41954	ID1YYUI01BC2GQ	CTAGACTCGTCATCGATGAAGAACGCTGCGAAATGCGATAAGTAGTGTGAATTGCAGAATTCAGTGAATCATCGAATCTTTGAACGCACATTGCGCCCTTTGGTATTCCTTAGGGCATGCCTGTTAGAGCGTCATTTCAAAATTCAAGCTCAGCTTGGTGATGGGCGTCTGTCCGGCCTCCGCGCGCGGACTCGCCTCAAAAGTAGTTGGCAGCTCCCTTATCGGCACTGAACGCAGCAAATTTGCGGGACGCACCGAAGAAAGGGGCTTACCAGTAAGCAAACCACCCCAGATTGACCTCGGATCAGGTAGGGATACCCGCTGAACTTAA	EU552139	SH237048.06FU		Saprotroph		Fungi	Ascomycota	Dothideomycetes	Pleosporales	Lophiostomataceae	Lophiostoma	FJ372389	Lophiostoma_sp_CBS_123543
GL42124	IGJRWKL02I9JL0	CTAGACTCGTCAACGATGAAGAACGCAGCGAAATGCGATAAGTAGTGTGAATTGCAGAATTCAGTGAATCATCGAATCTTTGAACGCACATTGCGCCCTTTGGTATTCCTTAGGGCATGCCTGTTCGAGCGTCATCTAACCCCTCAAGCACCGCTTGTTGTTGGGCGCCTGTCCCGCCTCCGCGCGCGGACTCGCCTCAAAGACATTGGCGGCCTGTGTATTGGCTACGAGCGCAGCAGACCCGCGCCTCGTCCCCTCTCGCGCAGGCGCCCAGGAAGCGCAAACCCCCAATTTTGACCTCGGATCAGGTAGGGATACCCGCTGAACTTAA	HQ914838	SH195482.06FU		Saprotroph		Fungi	Ascomycota	Dothideomycetes	Pleosporales	Lophiostomataceae	Lophiostoma	JQ761344	Dothideomycetes_sp_genotype_522
GL37748	ID03IXK02FWP31	GCATGCCTGTTCGAGCGTCATTTCAAACTTCAAGCCCCCCTCATGGCTTGGTGTTGGGCGTCTGTCCTCCCCCCGGGACTCGCCTCAAATGCATTGGCAGCCGGCACGTTGGCTTCGAGCGCAGCAGAAACGCGCGCGGCGTCTGACGGTGCCTGGCTCTCCAGGAAGCCTCCCCCCCAAGTTTGACCTCGGATCAGGTAGGGATACCCGCTGAACTTAA	JQ070522	SH229343.06FU		Saprotroph		Fungi	Ascomycota	Dothideomycetes	Pleosporales	Massarinaceae	Massarina	KC339223	Massarina_sp_MUT_4323
GL39802	ID03IXK02IPB9Y	CTAGACTCGTCACCGATGAAGAACGCAGCGAAATGCGATAAGTAGTGTGAATTGCAGAATTCAGTGAATCATCGAATCTTTGAACGCACATTGCGCCCCTCGGTATTCCGTGGGGCACGCCTGTTCGAGCGTCATTTACACCCTCAAGCGCAGCTTGGTGTTGGGCGTCTGTCCCGCTCTCCGTAGCGCGGACTCGCCTCAAAGTCATTGGCGGCGGTCGTGCCGGCTCCTCGCGCAGCACATTTGCGCTTCTCGGAGGCCCGGCGGATCGGCATCCAGCAAGCTACTTTTTATGACTTGACCTCGGATCAGGTGAGGATACCCGCTGAACTTAA	GU054203	SH196127.06FU		Saprotroph		Fungi	Ascomycota	Dothideomycetes	Pleosporales	Massarinaceae	Periconia	GU054203	uncultured_fungus
GL40478	ID03IXK02FNYNL	CTAGACTCGTCAACGATGAAGAACGCAGCGAAATGCGATAAGTAGTGTGAATTGCAGAATTCAGTGAATCATCGAATCTTTGAACGCACATTGCGCCCCTTGGTATTCCATGGGGCATGCCTGTTCGAGCGTCATTTGTACCCTCAAGCTCTGCTTGGTGTTGGGTGTTTGTCCCGCCTTTTGCGCGTGGACTCGCCTTAAAGCGATTGGCAGCCGGCATATTGTCTCGGAGCGCAGCACATTTTGCACTCTTTTACAATAGTTGTTGGTATCCAGTAAGCCTTTTACATTTGCTCTTGACCTCGGATCAGGTAGGGATACCCGCTGAACTTAA	AY969499	SH240088.06FU		Saprotroph		Fungi	Ascomycota	Dothideomycetes	Pleosporales	Melanommataceae	Herpotrichia	AF525676	Herpotrichia_parasitica
GL40974	ID03IXK02GHOLA	CTAGAACTCGTCATCGATGAAGAACGCTGCGAAATGCGATAAGTAGTGTGAATTGCAGAATTCAGTGAATCATCGAATCTTTGAACGCACATTGCGCCCCTTGGTATTCCATGGGGCATGCCTGTTCGAGCGTCATTTGTACCCTCAAGCTCTGCTTGGTGTTGGGTGTTTGTCCCGCCTTTTGCGCGTGGACTCGCCTTAAAGCGATTGGCAGCCGGCATATTGTCTCGGAGCGCAGCACATTTTGCGCTTCTTTGCATACTTGTTGGCATCCAGTAAGCCCTTTACATTTGCTCTTGACCTCGGATCAGGTAGGGATACCCGCTGAACTTAA	AY969499	SH240088.06FU		Saprotroph		Fungi	Ascomycota	Dothideomycetes	Pleosporales	Melanommataceae	Herpotrichia	AF525676	Herpotrichia_parasitica
GL35612	IGJRWKL02HIBXM	CTAGACTCGTCAACGATGAAGAACGCAGCGAAATGCGATAAGTAGTGTGAATTGCAGAATTCAGTGAATCATCGAATCTTTGAACGCACATTGCGCCCCTTGGTATTCCATGGGGCATGCCTGTTCGAGCGTCATCTACTACCCTCAAGCTCTGCTTGGTGTTGGGCGTCTGTCCCGCCTCTGCGCGTGGACTCGCCCCAAATTCATTGGCAGCGGTCTTTGCCTCCTCTCGCGCAGCACATTGCGCTTCTCGAGGTGCGCGGCCCGCGTCCACGAAGCAACATTACCGTCTTTGACCTCGGATCAGGTAGGGATACCCGCTGAACTTAA	JN983441	SH224124.06FU		Saprotroph		Fungi	Ascomycota	Dothideomycetes	Pleosporales	Montagnulaceae	Paraphaeosphaeria	KC208020	Paraphaeosphaeria_sp_ZZ_HJ_03
GL42294	IGJRWKL02JTU54	CTAGACTCGTCATCGATGAAGAACGTAGCGAAATGCGATAAGTAGTGTGAATTGCAGAATTCAGTGAATCATCGAATCTTTGAACGCACATTGCGCCCCTCGGTATTCCGTGGGGCATGCCTGTTCGAGCGTCATCTACACCCTCAAGCTCTGCTTGGTGTTGGGCGTCTGTCCCGCCTCTGCGCGCGGACTCGCCCCAAATTCATTGGCAGCGGTCTTTGCCTCCTCTCGCGCAGCACAATTGCGTCTGCGAGGGGGCGTGGCCCGCATCCACGAAGCAACATTACCGTCTTTGACCTCGGATCAGGTAGGGATACCCGCTGAACTTAA	EU489985	SH224125.06FU		Saprotroph		Fungi	Ascomycota	Dothideomycetes	Pleosporales	Montagnulaceae	Paraphaeosphaeria	JX401954	Paraphaeosphaeria_sp_PHY_31
GL38124	IGJRWKL02FR4II	CTGTTCGAGCGTCATTTCTACCACTCAAGCATAGCTTGGTATTGGGCATCGTTGCTTTTATTAAAAAGATAAACGTGCCTTAAATGTAGACGGCGGCAAACACTAGTTCCGAGCGTAGCAGTAAAACATTTCGCTTTAGAGAAACTAGTATATTGTCAACCGCATAGTTTTTACTACAGTTTGACCTCGGATCAGGCAGGGATACCCGCTGAACTTAA	JQ761306	SH239242.06FU		Saprotroph		Fungi	Ascomycota	Dothideomycetes	Pleosporales	Mytilinidiaceae	Lophium	EF619862	uncultured_Ascomycota|Dothideomycetes|
GL40771	IGJRWKL02JHJD9	CTAGACTCGTCAACGATGAAGAACGCAGCGAAATGCGAAAAGTAGTGTGAATTGCAGAATTCAGTGAATCATCGAATCTTTGAACGCACATTGCGCCCCTTGGTATTCCATGGGGCATGCCTGTTCGAGCGTCATTTGCACCTTCAAGCATTGCTTGGTGTTGGGTGTTTGTCCCCGTTTTACATGTGGGACTCGCCTTAAAGTGATTGGCAGCCGGCGTATAAGCCTTGGAGCGCAGCACATTTTGCGTCCCTCGGCCTGAACGTTGGCGTCCAGTAAGCCTATACTTTTGCTCTTGACCTCGGATCAGGTAGGGATACCCGCTGAACTTAA	HQ392612	SH196240.06FU		Saprotroph		Fungi	Ascomycota	Dothideomycetes	Pleosporales	Phaeosphaeriaceae	Ampelomyces	AY961406	Ampelomyces_sp_MosID15
GL40833	ID03IXK02I8504	CTAGACTCGTCACCGATGAAGAACGCAGCGAAATGCGAAAAGTAGTGTGAATTGCAGAATTCAGTGAATCATCGAATCTTTGAACGCACATTGCGCCCCTTGGTATTCCATGGGGCATGCCTGTTCGAGCGTCATTTGTACCTTCAAGCACTGCTTGGTGTTGGGTGTTTGTCCCCGTTTTACACGCGGGACTCGCCTTAAAGTGATTGGCAGCCGGCGTACTAGCCTCGGAGCGCAGCACATTTTGCGCCCCTTGACCTGAACGTTGGCGTCCAGTAAGCCTATACTTTTACTCTTGACCTCGGATCAGGTAGGGATACCCGCTGAACTTAA	HQ392612	SH196240.06FU		Saprotroph		Fungi	Ascomycota	Dothideomycetes	Pleosporales	Phaeosphaeriaceae	Ampelomyces	AY961406	Ampelomyces_sp_MosID15
GL48966	IGJRWKL02FZ907	CTAGACTCGTCATCGATGAAGAACGCTGCGAAATGCGATAAGTAGTGTGAATTGCAGAATTCAGTGAATCATCGAATCTTTGAACGCACATTGCGCCCCTTGGTATTCCATGGGGCATGCCTGTTCGAGCGTCATTTGTACCTTCAAGCTTTGCTTGGTGTTGGGTGTTTGTCCCGAGGGACTCGCCTTAAAGTAATTGGCAGCCAGTGTTTGGTTTTGAAGCGCAGCACAAGTCGCGATTCAAGGCTACACGCCCGCTTCCACAAGCCTTTTTTCACTTTTGACCTCGGATCAGGTAGGGATACCCGCTGAACTTAA	HQ713778	SH196178.06FU		Saprotroph		Fungi	Ascomycota	Dothideomycetes	Pleosporales	Phaeosphaeriaceae	Paraphoma	JX077012	Paraphoma_chrysanthemicola
GL45287	ID1YYUI01A6UVU	CTAGACTCGTCATCGATGAAGAACGCTGCGAAATGCGATAAGTAGTGTGAATTGCAGAATTCAGTGAATCATCGAATCTTTGAACGCACATTGCGCCCCTTGGTATTCCATGGGGCATGCCTGTTCGAGCGTCATTTGTACCCTCAAGCTTTGCTTGGTGTTGGGCGTCTTGTCTTGTATTAGACTCGCCTTAAAGTCATTTGGCAGCCAGTGTTTTTGGTAGTAAGCGCAGCACATTTTGCGTCTTAGTCCTTGAATCGTGGCATCCATGAAGCCTTTTTTCACTTTTGACCTCGGATCAGGTAGGGATACCCGCTGAACTTAA	AM231341	SH206983.06FU		Saprotroph		Fungi	Ascomycota	Dothideomycetes	Pleosporales	Phaeosphaeriaceae	Phaeosphaeriopsis	JQ846054	Phaeosphaeriopsis_sp_5473
GL44520	IGJRWKL02JP3V9	CTAGACTCGTCATCGATGAAGAACGCTGCGAAATGCGATAAGTAGTGTGAATTGCAGAATTCAGTGAATCATTCGAATCTTTGAACGCACATTGCGCCCCTTGGTATTCCATGGGGCATGCCTGTTCGAGCGTCATTTGTACTCTCAAGCCTTGCTTGGTGTTGGGTGTTTGTCTTCGCCTCGCTTAGACTCGCCTTAAATATATTGGCAGCCGGTATACTGGTTTGAAGCGCAGCACAATTGCATTTCAGGCTTTTAGTACTAGCATCCACAAAGATTATCAACACTTTTGACCTCGGATCAGGTAGGGATACCCGCTGAACTTAA	AM084441	SH227811.06FU				Fungi	Ascomycota	Dothideomycetes	Pleosporales	Phaeosphaeriaceae		EF505549	uncultured_endophytic_fungus
GL44007	ID1YYUI01DV1SQ	CTAGACTCGTCAACGATGAAGAACGCAGCGAAATGCGATAAGTAGTGTGAATTGCAGAATTCAGTGAATCATCGAATCTTTGAACGCACATTGCGCCCTTCGGTATTCCGTTGGGCATGCCTGTTCGAGCGTCATTTAAACCTTCAAGCTCTGCTTGGTGTTGGGTGTTTGTTCCGCCTTGGTGCGTGGACTCGCCTTAAATTCATTGGCAGCCGGTATGTTGGCTTCGTGCGCAGCACATTGCGTCACGCTTCTGGCAGACCTCCTCCCACTAAGCCTCTTTTCTACTTTGACCTCGGATCAGGTAGGGATACCCGCTGAACTTAA	GQ179993	SH194646.06FU		Saprotroph		Fungi	Ascomycota	Dothideomycetes	Pleosporales	Pleomassariaceae		GU174276	uncultured_fungus
GL32483	IGJRWKL02GHKYT	CTAGACTCGTCATCGATGAAGAACGCTGCGAAATGCGATAAGTAGTGTGAATTGCAGAATTCAGTGAATCATCGAATCTTTGAACGCACATTGCGCCCTTTGGTATTCCAAAGGGCATGCCTGTTCGAGCGTCATTTGTACCCTCAAGCTTTGCTTGGTGTTGGGCGTCTTGTCTCTAGCTTTGCTGGAGACTCGCCTTAAAGTAATTGGCAGCCGGCCTACTGGTTTCGGAGCGCAGCACAAGTCGCACTCTCTATCAGCAAAGGTCTAGCATCCATTAAGCCTTTTTTTCTAACTTTTGACCTCGGATCAGGTAGGGATACCCGCTGAACTTAA	HF548687	SH224789.06FU		Plant pathogen		Fungi	Ascomycota	Dothideomycetes	Pleosporales	Pleosporaceae	Alternaria	EF504930	uncultured_endophytic_fungus
GL36500	ID03IXK02H55QG	CTAGACTCGTCACCGATGAAGAACGCAGCGAAATGCGATACGTAGTGTGAATTGCAGAATTCAGTGAATCATCGAATCTTTGAACGCACATTGCGCCCTTTGGTATTCCAAAGGGCATGCCTGTTCGAGCGTCATTTGTACCTTCAAGCTTTGCTTGGTGTTGGGCGTCTTTTTGTCTTTGGCCTCGCCCAAAGACTCGCCTTAAAACGATTGGCAGCCGGCCTACTGGTTTCGCAGCGCAGCACATTTTTGCGCTTGCAATCAGCAAAAAGGACGGCAATCCATCAAGACTACATTTTACGTTTGACCTCGGATCAGGTAGGGATACCCGCTGAACTTAA	JX868779	SH224799.06FU		Plant pathogen		Fungi	Ascomycota	Dothideomycetes	Pleosporales	Pleosporaceae	Cochliobolus	JQ388926	Cochliobolus_lunatus
GL42026	IGJRWKL02G5OUZ	CTAGACTCGTCATCGATGAAGAACGTAGCGAAATGCGAAAAGTAGTGTGAATTGCAGAATTCAGTGAATCATCGAATCTTTGAACGCACATTGCGCCCCTTGGTATTCCATGGGGCATGCCTGTTCGAGCGTCATTTGTATCTTCAAGCTCTGCTTGGTGTTGGGTGTTTGTCCCGCTTTGTGCGTGGACTCGCCTTAAAGCAATTGGCAGCCGGCGTACTAGTCTGGGAGCGCAGCACAATTTGCGCTTCTGAACCTGAACGCTTGCGTCCATGAAGTCTATACTTTTGCTTTTGACCTCGGATCAGGTAGGGATACCCGCTGAACTTAA	AY805638	SH196231.06FU		Plant pathogen		Fungi	Ascomycota	Dothideomycetes	Pleosporales	Pleosporaceae	Pyrenochaeta	AB746924	Pleosporineae_sp_7S_As3_2_1
GL42274	ID1YYUI01CILYT	CTAGACTCGTCATCGATGAAGAACGCTGCGAAATGCGATAAGTAGTGTGAATTGCAGAATTCAGTGAATCATCGAATCTTTGAACGCACATTGCGCCCCTTGGTATTCCATGGGGCATGCCTGTTCGAGCGTCATTTGTACCCTCAAGCCTTGCTTGGTGTTGGGCGTTTGTCTCGCTTTCACGCGTGGACTCGCCTCAAAACGATTGGCAGCCGGCAAACCGGTGCAGAGCGCAGCACATTTTGCGCTTCTCTCCGCGAGGCCGGGCGTCCATGAAGCCTCCACTCTAGCTCTTGACCTCGGATCAGGTAGGGATACCCGCTGAACTTAA	AY649589	SH240064.06FU		Plant pathogen		Fungi	Ascomycota	Dothideomycetes	Pleosporales	Pleosporaceae	Pyrenochaeta	JQ247357	uncultured_Pyrenochaeta
GL44148	IGJRWKL02HB7ZB	CTAGACTCGTCATCGATGAAGAACGTAGCGAAATGCGATAAGTAGTGTGAATTGCAGAATTCCGTGAATCATCGAATCTTTGAACGCACATTGCGCCTATTGGTATTCCAATAGGCATGCCTGTTCGAGCGTCATTTAAGCCTTCAAGCCTTGCTTGGTGTTGGGCGTTGTCTGCGTGTGTGCGGACTCGCTTCAAATGCATTGGCAGTCAGCAATGGGGTTGTTGGAGCGCAGCACATTTTGCGTTCCCAGCCACAGGTGCCGGCGTCCACAAAGCTTATTTCAACGTTTGACCTCGGATCAGGTAGGGATACCCGCTGAACTTAA	FJ708614	SH229315.06FU		Plant pathogen		Fungi	Ascomycota	Dothideomycetes	Pleosporales	Pleosporaceae		AY230246	ascomycete_sp_DGC_6(5)
GL41393	IGJRWKL02GT5P4	CTAGACTCGTCATCGATGAAGAACGCTGCGAAATGCGATAAGTAGTGTGAATTGCAGAATTCAGTGAATCATCGAATCTTTGAACGCACACTGCGCCCTTTGGTATTCCTTAGGGCATGCCTGTTCGAGCGTCATTTGAAACCTCAAGCTCAGCTTGGTGTTGGGTGTCTGTCCCCGCCTCACCGCGGGGACTCGCCTCAAAATCATTGGCGGCCGGTACGTTGGCTTCGAGCGCAGCAGAAACGCGAACTCGAGGCCCGGCGGATCGGCGACCAGAAGTCACTTCTTCACAGTTTGACCTCGGATCAGGTAGGGATACCCGCTGAACTTAA	DQ468033	SH197547.06FU		Saprotroph		Fungi	Ascomycota	Dothideomycetes	Pleosporales	Sporormiaceae	Preussia	HQ637314	Preussia_pilosella
GL42210	ID1YYUI01DXJVL	CTAGACTCGTCATCGATGAAGAACGCTGCGAAATGCGATAAGTAGTGTGAATTGCAGAATTCAGTGAATCATCGAATCTTTGAACGCACATTGCGCCCTTTGGTATTCCTTAGGGCATGCCTGTTCGAGCGTCATTTAAACCTTCAAGCTCAGCTTGGTGTTGGGTGACTGTCCGCCGCCTCCGGGCGCGGACTCGCCTCAAAATTATTGGCGGCCGGTACTTTGGCTTCGAGCGCAGCAGAAACGCGAACTCGAGCCCGTTGTATTGGCTCCCAGAAGCTATCTTCACAATTTTGACCTCGGATCAGGTAGGGATACCCGCTGAACTTAA	AY510416	SH190471.06FU		Saprotroph		Fungi	Ascomycota	Dothideomycetes	Pleosporales	Sporormiaceae	Preussia	GQ153014	Sordariomycetes_sp_DC2118
GL42644	IGJRWKL02JER1H	CTAGACTCGTCATCGATGAAGAACGCAGCGAAATGCGATAAGTAGTGTGAATTGCAGAATTCAGTGAATCATCGAATCTTTGAACGCACATTGCGCCCTTTGGTATTCCTTAGGGCATGCCTGTTCGAGCGTCATTTAAACCTTCAAGCTCTGCTTGGTGTTGGGCCTGTCACGCCTCCCTCCGCGGGGGTGTGCGCCTCAAATGTATTGGCGGCCGGTACGTTGGCTTCGAGCGCAGCAGAAACGCGAACTCGAGGACTCCGGATCGGCCCTCCACAAGCTATTTAACATTTTGACCTCGGATCAGGTAGGGATACCCGCTGAACTTAA	EU517055	SH190503.06FU		Saprotroph		Fungi	Ascomycota	Dothideomycetes	Pleosporales	Sporormiaceae	Preussia	EU517055	uncultured_fungus
GL43736	IGJRWKL02HHBN1	CTAGACTCGTCATCGATGAAGAACGCAGCGAAATGCGATAAGTAGTGTGAATTGCAGAATTCAGTGAATCATCGAATCTTTGAACGCACATTGCGCCCTTTGGTATTCCTTAGGGCATGCCTGTTCGAGCGTCATTTAAACCTTCAAGCTCAGCTTGGTGTTGGGTGACTGTCCGCTTCACCGCGGACTCGCCTCAAAATTATTGGCGGCCGGTACATTGGCTCTCGAGCGCGGCAGAAACGCGTAACTCGAGGTCCTCGTGCTGGCTCCCAGAAGCTATCTTCACAATTTTGACCTCGGATCAGGTAGGGATACCCGCTGAACTTAA	AY510419	SH190475.06FU		Saprotroph		Fungi	Ascomycota	Dothideomycetes	Pleosporales	Sporormiaceae	Preussia	JN120332	Ascomycota_sp_ARIZ_CVIle2_5
GL43807	ID1YYUI01ERZIS	CTAGACTCGTCATCGATGAAGAACGTGGCGAAATGCGATAAGTAGTGTGAATTGCAGAATTCAGTGAATCATCGAATCTTTGAACGCACATTGCGCCCTTTGGTATTCCTTAGGGCATGCCTGTTCGAGCGTCATTTAAACCTTCAAGCTCAGCTTGGTGATGGGTGACTGTCCTCTCCTCGCGTTAGGACTCGCCCCAAATACATTGGCGGCCGGTACATTGGCTTCGAGCGCAGCAGAAACGCGGTCTCGAGTCCGGTGGACTTGCTCCCATAAGCATCTTTTTATTTTGACCTCGGATCAGGTAGGGATACCCGCTGAACTTAA	DQ468022	SH190480.06FU		Saprotroph		Fungi	Ascomycota	Dothideomycetes	Pleosporales	Sporormiaceae	Preussia	GQ153107	Dothideomycetes_sp_11133
GL46274	IGJRWKL02HZ8Y9	CTAGACTCGTCATCGATGAAGAACGCTGCGAAATGCGATAAGTAGTGTGAATTGCAGAATTCAGTGAATCATCGAATCTTTGAACGCACATTGCGCCCTTTGGTATTCCTTAGGGCATGCCTGTTCGAGCGTCATTTAAACCTTCAAGCTCAGCTTGGTGTTGGGTGACTGTCCGCTTGCGGACTCGCCTCAAAATGATTGGCGGCCGGTACTTTTGGCTTCGAGCGCAGCAGAAACGCGAACTCGAGGCCTGTGTGCTGGCTCCCAGAAGCTATCTTCACAATTTTGACCTCGGATCAGGTAGGGATACCCGCTGAACTTAA	AY510418	SH190472.06FU		Saprotroph		Fungi	Ascomycota	Dothideomycetes	Pleosporales	Sporormiaceae	Preussia	JQ760318	Dothideomycetes_sp_genotype_177
GL31755	IJOVCJS01C09I9	CTAGACTCGTCATCGATGAAGAACGCAGCGAAATGCGATAAGTAGTGTGAATTGCAGAATTCAGTGAATCATCGAATCTTTGAACGCACATTGCGCCCCTCGGTATCCCGGGGGGCATGCCTGTTCGAGCGTCATTTCTACCACTCAAGCTTAGCTTGGTATTGGGTATCGTTTACCTTGTTTATAATGAAGAAGGGTCCTAACGTGCCTTAAATAGAGACGGCGATTTAACCCCCAGCTTAGAGTGTAGCAGTAAAACATTTTCACTCTTAAGTCTTTTTGGGGCGTTGTCTACCGCATAGTTTTATTACTACAGTTTGACCTCGGATCAGGCAGGGATACCCGCTGAACTTAA	FM200506	SH216335.06FU		Saprotroph		Fungi	Ascomycota	Dothideomycetes	Pleosporales	Tubeufiaceae	Helicoma	FN435802	Ascomycota_sp_agrAR118
GL42075	IGJRWKL02HFAGM	CTAGGACTCGTCACCGATGAAGAACGCAGCGAAATGCGATAAGTAGTGTGAATTGCAGAATTCAGTGAATCATCGAATCTTTGAACGCACATTGCGCCCCTTGGTATTCCATGGGGCATGCCTGTTCGAGCGTCATTTGTACCTTCAAGCTCTGCTTGGTGTTGGGTGTTTGTCCCGCCTTTGTGCGCGGACTCGCCTTAAAGCAATTGGCAGCCGGCGTATAGATTTCGGAGCGCAGCACAATCCGCGCTTTGTACTCATTACGACGACATCCATCAAGACATTTTTTAACTCTTGACCTCGGATCAGGTAGGGATACCCGCTGAACTTAA	EU516923	SH233951.06FU		Plant pathogen		Fungi	Ascomycota	Dothideomycetes	Pleosporales		Ascochyta	JX401949	Ascochyta_sp_PHY_36
GL42772	ID1YYUI01DWUTS	CTAGACTCGTCATCGATGAAGAACGCAGCGAAATGCGAAAAGTAGTGTGAATTGCAGAATTCAGTGAATCATCGAATCTTTGAACGCACATTGCGCCCCTTGGTATTCCATGGGGCATGCCTGTTCGAGCGTCATTTGTACCTTCAAGCTCTGCTTGGTGTTGGGTGTTTGTCCCGCTTTTTGCGTGGACTCGCCTCAAAGCAATTGGCAGCCGGCGTACTAGCCTGGAGCGCAGCACATTTTGCGCATCTTGACTTGAACGCTTGCGTCCATTAAGCACATATTTTAACTCTTGACCTCGGATCAGGTAGGGATACCCGCTGAACTTAA	KC354574	SH196233.06FU		Plant pathogen		Fungi	Ascomycota	Dothideomycetes	Pleosporales		Asteromella	HQ416962	fungal_sp_KL_2011
GL47411	IGJRWKL02JP3ZW	AGTGAATCATCGAATCTTTGAACGCACATTGCGCCCTTTGGTATTCCTTAGGGCATGCCTGTTCGAGCGTCATTTTCACCTTCAAGCACAGCTTGGTGTTGGGCGTCTGTCCCCTGCGGACTCGCCTCGAAACTATTGGCAGCCACTCCAGCGGCTTTGAGCGCAGCAGAATTGCGTCTCTTGCGGCGAGGGGGGGCATCCATAAGCATACTTTTTATTTTGACCTCGGATCAGGTAGGGATACCCGCTGAACTTAA	JQ070521	SH215431.06FU				Fungi	Ascomycota	Dothideomycetes	Pleosporales			FN397433	uncultured_fungus
GL41836	ID1YYUI02G4DJT	CTAGACTCGTCACCGATGAAGAACGCAGCGAAATGCGATAAGTAGTGTGAATTGCAGAATTCAGTGAATCATCGAATCTTTGAACGCACATTGCGCCCCTTGGTATTCCATGGGGCATGCCTGTTCGAGCGTTATTTGTACCCTCCAGCCCTGCTGGGTGTTGGGCGTTTTGTTCCGCTGCGCGCGTGAACTCGCCTCAAATGCATTGGCAGCCCGCCGTCCCGTGTGGGAGCGCAGCACATTTTGCGCTCTCCGCTGCTGACGGTGGCATCCATAAAGTCTACCATTTTACGCTTGACCTCGGATCAGGTAGGGATACCCGCTGAACTTAA	JX243954	SH211756.06FU				Fungi	Ascomycota	Dothideomycetes	Pleosporales			HM239927	uncultured_Ascomycota
GL42050	IJOVCJS01DO5K4	AAAATTAGCGAAAACTTTCAACAACGGATCTCTTGGTTCTGGCACCGATGAAGAACGCAGCGAAATGCGATAAGTAGTGTGAATTGCAGAATTCAGTGAATCATCGAATCTTTGAACGCACATTGCGCCCCTTGGTATTCCATGGGGCATGCCTGTTCGAGCGTCATTTACACCCTCAAGCTCTGCTTGGTGTTGGGCGTCTGTCCCCGCTTCGTGCGCGGACTCGCCCCAAAGGTATTGGCAGCGGTCTTGCCAGCTTCTCGCGCAGCACATTGCGCTTCTCGAGGCTCCGGCGGATCGGCGTCCATCAAGCCCACATCACAGTTTGACCTCGGATCAGGTAGGGATACCCGCTGAACTTAA	FJ553168	SH223803.06FU				Fungi	Ascomycota	Dothideomycetes	Pleosporales			FJ553168	uncultured_Ascomycota
GL31328	IGJRWKL02FREOM	CTAGACTCGTCATCGATGAAGAACGTGGCGAAACGCGAAAGGTAATGGGCGAATTGCAGAATCAGTGAGTCATCGAATCTTTGAACGCACATTGCGCCTCTAGGTATTCCTGGAGGCACGCCTGTTCGAGCGCCATTACACACTCCAAGCTCTGCTTGATGTTGGACGGCCCGAGAGATCGGACGTCTGGAACGTGTGGGCGTCGGGCGTCGGACCACGAGCGTAGCAAGACCTTGCAGTCAAGTCGTTCTGTGGAGCCGGCGGTCGACCGCCTCTCTATAAACTTTACTTCACAAGTTTGGCCTCGGATCAGGCGGGGATACCCGCTGAACTTAA	HQ667523	SH221483.06FU		Saprotroph		Fungi	Ascomycota	Dothideomycetes	Venturiales	Sympoventuriaceae	Ochroconis	HE998745	fungal_sp_OTU_084
GL39284	ID1YYUI01CLAMJ	CTAGACTCGTCACCGATGAAGAACGCAGCGAAATGCGATAATTAATGTGAATTGCAGAATTCAGTGAATCATCGAATCTTTGAACGCACATTGCGCCTCCTGGTATTCCGGGAGGCACGCCTGTCCGAGCGCCATTACACCCCCCAAGCCTTGCTTGATGTTGGGCCATGACATACCCGTCAGGCCCCAAACCTTTAGGCGCCCCCTACTGGCCGCGAGCGTAGCAAGAATTTATTTTCCCTCGCTTCGCGTGTCCAATAGGCGGGCCGCCCATCGACCCACAAAACTTTTACAAGGTTTGGCCTCGGATCAGGCGGGGATACCCGCTGAACTTAA	FM200596	SH224254.06FU		Saprotroph		Fungi	Ascomycota	Dothideomycetes	Venturiales	Sympoventuriaceae	Ochroconis	FJ553943	uncultured_Ascomycota
GL39310	ID1YYUI01A17RU	CTAGACTCGTCATCGATGAAGAACGTGGCGAAACGCGAAAGGTAATGCGAATTGCAGAATCAGTGAGTCATCGAATCTTTGAACGCACATTGCGCCTCTCGGTATTCCGGGAGGCACGCCTGTTCGAGCGCCATTACACACTCCAAGCGATGCTTGATGTTGGACGATGCGATGCCCTGGGTATCGCACGTCTGGAACGCGTGGGCGCCCCGCCGCCGGAACGTGAACGTAGCAAGACGTCAGTCACAATCGTTCAGTAAGTTCTGACGGAGGGCCGCCTCAACTCTTTCTATAAATTTGGCCTCGGATCAGGCGGGGATACCCGCTGAACTTAA	KC506239	SH232726.06FU		Saprotroph		Fungi	Ascomycota	Dothideomycetes	Venturiales	Sympoventuriaceae	Ochroconis	EF619859	uncultured_Ascomycota|Orbiliales|
GL41568	ID1YYUI01A55M2	CTAGACTCGTCATCGATGAAGAACGCTGCGAAATGCGATAAGTAATGTGAATTGCAGAATTCAGTGAATCATCGAATCTTTGAACGCACATTGCGCCCCCTGGTATTCCGGGGGGCACGCCTGTTCGAGCGCCATTTCAACCCTCAAGCCTAGCTTGGTGATGGGCCACATCCCGCAGGGGCGGGCCCGAAACTCGTAGGGCGCTGTCCGCCGGCTCTGAGCGTAGCAAGAGAAATCCCTCGCTCCGAATGTCCGTCGGGTGGCCGCCTCGAAAACTCACAAAATATTACAAGGTTGGCCTCGGATCAGGCGGGGATACCCGCTGAACTTAA	EU035453	SH238427.06FU		Plant pathogen		Fungi	Ascomycota	Dothideomycetes	Venturiales	Venturiaceae	Venturia	EF619863	uncultured_Ascomycota|Dothideomycetes|
GL35352	ID1YYUI01CGH3I	CTAGACTCGTCATCGATGAAGAACGCTGCGAAATGCGATAAGTAATGTGAATTGCAGAATTCAGTGAATTCAGTGAATCATCGAATCTTTGAACGCACATTGCGCCCCCTGGTATTCCGGGGGGCACGCCTGTTCGAGCGCCATTTCAACCCTCAAGCCTAGCTTGGTGATGGGCCACATCCCGCAGGGGCGGGCCCGAAACTCGTAGGGCGCTGTCCGCCGGCTCTGAGCGTAGCAAGAGAAATCCCTCGCTCCGGATGTCCGTCGGGTGGCCGCCTCGAAAACTCACAAAATATTACAAGGTTGGCCTCGGATCAGGCGGGGATACCCACTGAACTTAA	EU035453	SH238427.06FU		Plant pathogen		Fungi	Ascomycota	Dothideomycetes	Venturiales	Venturiaceae	Venturia	EF619863	uncultured_Ascomycota|Dothideomycetes|
GL41592	ID1YYUI01EGNC7	CTAGACTCGTCATCGATGAAGAACGCAGCGAAATGCGATGAGTAATGTGAATTGCAGAATTCAGTGAATCATCGAATCTTTGAACGCACATTGCGCCCCCTGGTATTCCGGGGGGCACGCCTGTTCGAGCGCCATTTCAACCCTCAAGCCCAGCTTGGTTATGGGCCACGCCCGCAGGGGCGGGCCCGAAACTCGTAGGGCGCCGTCCGCCGGCTCTGAGCGTAGCAAGAGAAATCCCTCGCTCCGGATGTCCGTCGGGTGGTCGCCTCGAAAAACCCACGAAATAACACAAGGTTGGCCTCGGATCAGGCGGGGATACCCGCTGAACTTAA	EU035453	SH238427.06FU		Plant pathogen		Fungi	Ascomycota	Dothideomycetes	Venturiales	Venturiaceae	Venturia	EF619863	uncultured_Ascomycota|Dothideomycetes|
GL44800	ID03IXK02JM8HJ	CTAGACTCGTCAACGATGAAGAACGCAGCGAAATGCGATAAGTAATGTGAATTGCAGAATTCAGTGAATCATCGAATCTTTGAACGCACATTGCGCCCCCTGGTATTCCGGGGGGCACACCTGTTCGAGCGCCATTTCAACCCTCGAGCCCTGCTCGGTGATGGGCGACGCCTGGATTCACCAGGCGCGCCCGAAACTCGTTGGCGCCGTCGTCCGGCCCTGAGCGTAGCAAGAGAAATCCCTCGCTCGGTGGACCGTCCGGCGGCCGCCCCGACCACTTTCACAAGGTTGGCCTCGGATCAGGTGGGAATACCCGCTGAACTTAA	JN032486	SH230874.06FU		Plant pathogen		Fungi	Ascomycota	Dothideomycetes	Venturiales	Venturiaceae	Venturia	HQ211589	uncultured_Venturia
GL47400	ID1YYUI01B50UZ	CTAGACTCGTCATCGATGAAGAACGCTGCGAAATGCGATAAGTAATGTGAATTGCAGAATTCAGTGAATCATCGAATCTTTGAACGCACATTGCGCCCCTTGGTATTCCGGGGGGCACACCTGTTCGAGCGCCATTTTCACCATCGAGCCCTGCTCGGAGATGGGCTTTGTCCTCGCGGACGGGCCCGAAACCCGTGGGCGCCTTCGTCCGGCCCTGAGCGTAGCAAGAGAAATCCCTCGCTCGGTGGACCGTATGGTGGCCGCCCCGACTATTTTTCATAAGATTGGCCTCGGATCAGGTGGGGATACCCGCTGAACTTAA	EF434013	SH207408.06FU		Plant pathogen		Fungi	Ascomycota	Dothideomycetes	Venturiales	Venturiaceae	Venturia	EU292512	uncultured_fungus
GL47609	ID1YYUI02I2N6D	CTAGACTCGTCATCGATGAAGAACGCTGCGAAATGCGATAAGTAATGTGAATTGCAGAATTCAGTGAATCATCGAATCTTTGAACGCACATTGCGCCCCCTGGTATTCCGGGGGGCACACCTGTTCGAGCGCCATTTCTACCCTAGAGCCATGCTCTGTGATGGGCCCCGTCCTCGCGGACGGGCCCGAAACCCGTGGGCGCCGTCGTCCGGCCCTGAGCGTAGCAAGAGAAATCCCTCGCTCGGAGTGTCTGACGGTGGTTGCCCTGACCTATTTTTATAAGGTTGGCCTCGGATCAGGTGGGGATACCCGCTGAACTTAA	FJ552798	SH238429.06FU		Plant pathogen		Fungi	Ascomycota	Dothideomycetes	Venturiales	Venturiaceae	Venturia	FJ552798	uncultured_Venturia
GL33501	IGJRWKL02JF3PC	CTAGACTCGTCAACGATGAAGAACGCAGCGAAATGCGATAAGTAATGTGAATTGCAGAATTCAGTGAATCATCGAATCTTTGAACGCACATTGCGCCCCTTGGTATTCCGAGGGGCATGCCTGTTCGAGCGTCATTACACCACTCAAGCACTGCTTGGTATTGGGCATCGTCCGTCGAAAGACGGGCGTGCCTCGAAGACCTCGGCGGGGCCTAACCGGCTTCGGGCGTAGTAGAGTTAAATCGAACGTCTTATAAGTCTGGTTAGAACCCATTGCCGTAAAACCTTTTATTTTCTAGGTTGACCTCGGATCAGGTAGGGATACCCGCTGAACTTAA	JF440616	SH231448.06FU		Plant pathogen		Fungi	Ascomycota	Dothideomycetes			Scleroconidioma	HM122967	fungal_sp_ARIZ_AZ0219
GL33434	ID03IXK02JR9JL	CTAGACTCGTCACCGATGAAGAACGCAGCGAAATGCGATAAGTAGTGTGAATTGCAGAATTCAGTGAATCATCGAATTTTTGAACGCACATTGCGCCCCTTGGTATCCCGAGGGGCATGCCTGTTCGAGCGTCATTTCAATCTCTCAAGCTTTGCTTGGTATTGGGCATCATTATCTCCTTTTTAAACAAGGGTAAATGTGCCTTAAATATAGGCAGCGGCATGTACTAGTTCCGAGCGTAGCAGTTTTAAACATTTTCGCTTTAGGAGTCTGGTATAATGTCAGCTATATAATTAAAAGTCTTGACTTTTATTTGACCTCGGATCAGGTAGGGATACCCGCTGAACTTAA	JQ761306	SH239242.06FU				Fungi	Ascomycota	Dothideomycetes				JQ312715	uncultured_fungus
GL34733	IGJRWKL02JIN49	CTAGACTCGTCAACGATGAAGAACGCAGCGAAATGCGATAACTAGTGTGAATTGCAGATTTCAGTGAATCATCGAGTCTTTGAACGCACATTGCGCCCCCTGGTATTCCTAGGGGCATGCCTATTCGAGCGTCGTTTACACCCTCAAGCGCAAGCTTGGTGTTGGGGATCGCCCCTCCCTCGCGGGAGGCGGCGGCCCTTGAATCCATCGGCGGTGCCGGTGCGGCCTGGAGCGCAGCAGCGATGCAGCTCGTGGGTCCGCTCGACGCCTGCCGTGCAAGCGTGGTCTTCGCGGCCACACCTTCAAACGTCGACCTCGAATTGGGTAGGGATACCCGCTGAACTTAA	DQ421225	SH216771.06FU				Fungi	Ascomycota	Dothideomycetes				DQ421225	uncultured_soil_fungus
GL35238	IGJRWKL02GKVXF	CTTTGAACGCACATTGCGCCCCTTGGTATTCCATGGGGCATGCCTGTTCGAGCGTCATTTGTACCCTCAAGCTCTGCTTGGTGTTGGGTGTTTGTCCTCTCCTTTGCGTTTGGACTCGCCTTAAAGCAATTGGCAGCCAGTGTTTTGGTATTGAAGCGCAGCACATTTTGCGATTCTAGCCGATAATACTTGCGTCCATAAGCCTTTTTTAACTTTGACCTCGGATCAGGTAGGGATACCCGCTGAACTTAA	GU581242	SH199974.06FU				Fungi	Ascomycota	Dothideomycetes				JQ759537	Dothideomycetes_sp_genotype_113
GL41377	ID1YYUI01EN61O	CTAGACTCGTCATCGATGAAGAACGCAGCGAAATGCGATAAGTAATGTGAATTGCAGAATTCAGTGAATCATCGAATCTTTGAACGCACATTGCGCCCCCTGGTATTCCGGGGGGCACACCTGTTCGAGCGCCATTTTCACCATCGAGCCCTGCTCAGCGATGGGCCTCGTCCTTACGGACGGGCTCGAAACCCGTGGGCGCCGTCGTCCGGCCCTGAGCGTAGCAAGAGAAATCCCTCGCTCGGTGTGTCGTCCGGTGGCCGCCCCGACAACCATTTTAAAGGTTGGCCTCGGATCAGGTGGGGATACCCGCTGAACTTAA	KC867780	SH238427.06FU				Fungi	Ascomycota	Dothideomycetes				FJ475667	uncultured_Dothideomycetes
GL41409	IGJRWKL02JOKJ9	CTAGACTCGTCATCGATGAAGAACGCAGCGAAATGCGATAAGTAGTGTGAATTGCAGAATTCAGTGAATCATCGAATCTTTGAACGCACATTGCGCCCCTTGGTATTCCATGGGGCATGCCTGTTCGAGCGTCATTTACACCCTCAAGCTCCGCTTGGTGTTGGGCGTCTGTCCGCGCAGTTTGCGTGGACTCGCCCCAAAGGTATTGGCAGCGGTCTTGCCAGCTTCTCGCGCAGCACATTGCGCTTCTGGAGGCTTCGGCGGATCGGCGTCCATCAAGTCCACACCCACAGTTTGACCTCGGATCAGGTAGGGATACCCGCTGAACTTAA	KC965793	SH223802.06FU				Fungi	Ascomycota	Dothideomycetes				HQ873356	uncultured_fungus
GL41713	ID03IXK02JSNF1	CTAGACTCGTCATCGATGAAGAACGCAGCGAAATGCGATAAGTAGTGTGAATTGCAGAATTCAGTGAATCATCGAATCTTTGAACGCACATTGCGCCCCTCGGTATTCCGTGGGGCATGCCTGTTCGAGCGTCATTTACACCCTCAAGCTCTGCTTGGTGTTGGGCGTCTGTCCCGCCTCCCGTGCGCGGACTCGCCTCAAAGTCATTGGCAGCGGTCTCGTCGGCTTCTCGCGCAGCACATTTGCGCTTCTCGGAGCCCCGGCGGATCAGCGTCCAGCAAGCAATTTCATGACTTGACCTCGGATCAGGTAGGGATACCCGCTGAACTTAA	JX984754	SH232015.06FU				Fungi	Ascomycota	Dothideomycetes				JX984754	uncultured_fungus
GL42599	IGJRWKL02G14WP	CTAGACTCGTCAACGATGAAGAACGCAGCGAAATGCGATAAGTAGTGTGAATTGCAGAATTCAGTGAATCATCGAATCTTTGAACGCACATTGCGCCCCTTGGTATTCCATGGGGCATGCTTGTTCGAGCGTCATTTGTACTCTCAAGCTTTGCTTGGTGTTGGGTGTTTGTCCTTTCCTTGTGGTTGGACTCGCCTTAAATTCATTGGCAGCCAAAGTATTGGTTTGAAGCGCAGCACAATTTGCGATTCTGACTGGTATTGTTTGCGTCCAGTAAGCACATTTAACACTTTTGACCTCGGATCAAGTAGGGATACCCGCTGAACTTAA	JX982367	SH231238.06FU				Fungi	Ascomycota	Dothideomycetes				AJ608974	fungal_sp_GFI_145
GL43331	IGJRWKL02HAE5T	CTAGACTCGTCACCGATGAAGAACGCAGCGAAATGCGATAAGTAGTGTGAATTGCAGAATTCAGTGAATCATCGAATCTTTGAACGCACATTGCGCCCCTTGGTATTCCATGGGGCATGCCTGTTCGAGCGTCATTTGTACCCTTAAGCTCTGCTTAGTGTTGGGTGTTTGTCCCGCTTCGCGCGTGGACTCGCCTTAAAGCCATTGGCAGCCGGCATATTGTCTCGGAGCGCAGCACATTTTGCACTTCTAACATGAATGTTGGTATCCAGTAAGCCTTTACATTTGCTCTTGACCTCGGATCAGGTAGGGATACCCGCTGAACTTAA	AY969499	SH240088.06FU				Fungi	Ascomycota	Dothideomycetes				AY969599	uncultured_Ascomycota
GL43404	ID1YYUI01C841V	CTAGACTCGTCAACGATGAAGAACGCAGCGAAATGCGATAAGTAATGTGAATTGCAGAATTCAGTGAATCATCGAATCTTTGAACGCACATTGCACCCATTGGAATTCCGATGGGTATGCCTGTTCGAGCGTCATTTAAACCTTCAAGCTCCGGCTTGGTATTGGGCAATTGCCAGCTAGGGCATGCCTGAAAAGCAGAGGCGGTCAGTAGCCTTAGGTACAAGCGTAGTGAAATAATTTTCGCGAATGCCTTTGGGGAGAGCCTGCCACAAAGCAAATATTTACAAGTGTTTGACCTCGGATCAGGTAGGGATACCCGCTGAACTTAA	GQ856144	SH230818.06FU				Fungi	Ascomycota	Dothideomycetes				AM902012	uncultured_Ascomycota
GL47502	ID03IXK02H143Y	CTAGACTCGTCAACGATGAAGAACGCAGCGAAATGCGATAAGTAATGTGAATTGCAGAATTCAGTGAATCATCGAATCTTTGAACGCACATTGCGCCCTTTGGCATTCCGAAGGGCATGCCCGTTCGAGCGTCATTACACCACTCAAGCCTGGCTTGGTATTGGGCGACGGGACATCTCCCGCGCCTCTAATTCTTCGGCTGGACGGTTCGAATCTCAGCGTTGTGGTTTAATCAAAATCGCTGGCGAGGACGACCGGACGCGCCGTGAAAACCTCATTACAGGTTGACCTCGGATCGGGTAGGGATACCCGCTGAACTTAA	EF592087	SH195036.06FU				Fungi	Ascomycota	Dothideomycetes				JX915537	uncultured_fungus
GL48360	IGJRWKL02HEJBF	CTAGACTCGTCAACGATGAAGAACGCAGCGAAATGCGATAAGTAATGTGAATTGCAGAACTCAGTGAATCATCGAATCTTTGAACGCACATTGCGCCCTCTGGTATTCCGGAGGGCATGCCTGTTCGAGCGTCATTTCACCACTCAAGCCTGGCTTGGTATTGGGCGCCGCGGTGTTCCGCGCGCCTCAAAGTCTCCGGCTGAGCTGTCCGTCTCCAAGCGTTGTGATTTCATTAATCGCTTCGGGGTGCGGGCGGCCGCGGCCGTTAAATCTTTCACAAGGTTGACCTCGGATCAGGTAGGGATACCCGCTGAACTTAA	DQ979607	SH212655.06FU				Fungi	Ascomycota	Dothideomycetes				JQ823164	fungal_endophyte
GL48488	IGJRWKL02HXW1S	AGTGAATCATCGAATCTTTGAACGCACATTGCGCCCCTTGGTATTCCGAGGGGCATGCCTGTTCGAGCGTCATTTCACCACTCAAGCCTGGCTTGGTATTGGGCGCCGCGGTCCGCCGCGCGCCTTAATGTGTCCGGCTGAGCCGTCCGTCTCTAAGCGTTGTGGTAACCTATCCGCTTGCGAGATTGGGGGGCGTCTGGCCGTTAAACTCATTCAAAGGTTGACCTCGGATCAGGTAGGGATACCCGCTGAACTTAA	AY969420	SH230642.06FU				Fungi	Ascomycota	Dothideomycetes				JQ760007	Dothideomycetes_sp_genotype_257
GL49149	ID03IXK02IB4BP	GTGAATCATCGAATCTTTGAACGCACATTGCGCCCTTTGGTATTCCTTAGGGCATGCCTGTTCGAGCGTCATTTTCACCTTCAAGCACAGCTTGGTGTTGGGCGTCTGTCCTCGCGGACTCGCCTCGAAACTATTGGCAGCCACTCCAGCGGCTTTGAGCGCAGCAGAATTGCGTCTCTTGCGGCGAGGGGGGGCATCCATAAGCATACTTTTTTATTTTGACCTCGGATCAGGTAGGGATACCCGCTGAACTTAA	JQ070521	SH215431.06FU				Fungi	Ascomycota	Dothideomycetes				HQ433104	uncultured_Ascomycota
GL49410	ID1YYUI01EMKAK	CTAGACTCGTCATCGATGAAGAACGCTGCGAAATGCGATAAGTAATGTGAATTGCAGAATTCAGTGAATCATCGAATCTTTGAACGCACATTGCGCCCCCTGGTATTCCGGGGGGCACACCTGTTCGAGCGCCATTTCAACCCTCAAGCCCTGCTTGGTGATGGGCCCCGCCAGCACGGCGGGCCCGAAACTCGTGGGCGTCGTCGGCCGGCTTCAAGCGTAGCAAAACCCTCGCTTTGGAGACCGTCCGGCGGCCGCCTTGGAACGAATTTTTACAAGGTTGGCCTCGGATCAGGTGGGGATACCCGCTGAACTTAA	AY969479	SH195930.06FU				Fungi	Ascomycota	Dothideomycetes				HQ873380	uncultured_fungus
GL50128	IGJRWKL02G3BU7	CTAGACTCGTCACCGATGAAGAACGCAGCGAAATGCGATAAGTAATGTGAATTGCAGAATTTAGTGAATCATCGAATTTTTGAACGCATATTGCGCCTCTTGGTATTCCTTGAGGCATATCTGTTCGAGCGCCGTTTTAATACTATGGCTTTGCCTTGTGTTAATGGTGTTCTGTCGAGAACCTATTGAAATTGTCAAGTCGGCGTTGATACAAAGTTTGAATTTGCAGCAAAATGTGAACTGAAAACTTGTCCTCAGTTGCCTTACTACTGAAATCATGGCCTCGGATCAGATAGGGATACCCGCTGAACTTAA	FJ612950	SH224631.06FU				Fungi	Ascomycota	Dothideomycetes				HQ696659	Spirosphaera_minuta
GL28424	ID1YYUI01CUPBJ	CTAGACTCGTCAACGATGAAGAACGCAGCGAAATGCGATAAGTAATGCGAATTGCAGAATCCGTGAGTCATCGAATCCTTGAACGCACATTGCGCCCTTTGGTATTCCGAAGGGCATGCCTGTTCGAGCGTCATTATCACCCCTCAAGCCCGGCTTGCTGTTGGTGGTGGCGCGGCCCCCTCCCGGGCCGCCGCCCCGTCCAAAGATAATGACGGCGTCTGTGAGGACTCCTGTACACTGAGCTTTCGGGCACGTACACGGTTAGAAATTCAGACGCCGGTCGCCGCCTTCCCCCCGGGGGAGGCACACCTTTCATACCAAGGTTGACCTCGGATCAGGTAGGGATACCCGCTGAACTTAA	AY857542	SH219207.06FU		Saprotroph		Fungi	Ascomycota	Eurotiomycetes	Chaetothyriales	Cyphellophoraceae	Cyphellophora	FR682328	uncultured_Ascomycota
GL34394	ID1YYUI01CU4O2	CTAGACTCGTCACCGATGAAGAACGCAGCGAAATGCGATAAGTAATGCGAATTGCAGAATCCGTGAGTCATCGAATCTTTGAACGCATATTGCGCCCTCTGGTATTCCGGGGGGCATGCCTGTTCGAGCGTCATTATCACCCCTCAAGCCCGGCTTGTTGTTGGACGTCGGCGGGGCCGTTTAGGCACCACCCGTCTCAAAGATAATGACGGCGTCTGCGAGGACTCCTATACACTGAGCTTTCGGGCACGTACTAGGCTAGCACTCCAGACCCGGTCTTGGTCGCTTCGGCGACAACTTTTACCAAGGTTGACCTCGGATCAGGTAGGAATACCCGCTGAACTTAA	JQ766437	SH232793.06FU		Saprotroph		Fungi	Ascomycota	Eurotiomycetes	Chaetothyriales	Cyphellophoraceae	Cyphellophora	JQ766458	Cyphellophora_sp_CBS_11294
GL30817	IJOVCJS01BYVTL	CTAAGACTCGTCATCGATGAAGAACGCTGCGAAATGCGATAAGTAATGCGAATTGCAGAATTTCCGTGAGCCATCGAATCTTTGAACGCACATTGCGCCCACTGGTATTCCGGTGGGCATGCCTGTTCGAGCGTCATTATCCTCCCTCAAACCTCGGGTTTGGTGTTGGACCCAAGTTGTGTGAACAACTGGTCTCAAAGACAATGACGGCGTCCGTGGGACCCTCGGTGCAACGAGCTTTTTAAACGAGCACGCGTCGAGTTTCAAGGACCTTCCGGGCCGGTCTCCTTCTTTTATTTACAAAGGTTGACCTCGGATCAGGTAGGAATACCCGCTGAACTTAA	DQ421063	SH209735.06FU		Saprotroph	Facultative yeast	Fungi	Ascomycota	Eurotiomycetes	Chaetothyriales	Herpotrichiellaceae	Capronia	JQ354915	Capronia_sp_SL102031
GL38271	ID03IXK02HS0FY	CTAGACTCGTCATCGATGAAGAACGCTGCGAAATGCGATAAGTAATGCGAATTGCAGAATCCGTGAGTCATCGAATCTTTGAACGCATATTGCGCCCTTTGGTATTCCGAAGGGCATGCCTGTTCGAGCGTCATTATCACCTCTCAAGCCTGGCTTGCTGTTGGACTTTAGGTCATGCTTTAGCTAAGACCGGTCCCAAAGATAATGACGGCGTCTGTGAGGACCCCAGTACAATGAGCTTTTATAGCACGTACTAGGCGGGAATCCAGGCCCGGTCTTACTTATTTATTTTATCAAGGTTGACCTCGGATCAGGTAGGAATACCCGCTGAACTTAA	EU139147	SH227225.06FU		Saprotroph	Facultative yeast	Fungi	Ascomycota	Eurotiomycetes	Chaetothyriales	Herpotrichiellaceae	Capronia	EU139148	Capronia_sp_94006a
GL39769	ID1YYUI01DCQRY	TAGACTCGTCACCGATGAAGAACGCAGCGAAATGCGATAAGTAATGCGAATTGCAGAATTCAGTGAGTCATCGAATCTTTGAACGCATATTGCGCCCTTTGGTATTCCGAAGGGCATGCCTGTTCGAGCGTCATTATCAACCATCAAGCCTGGCTTGTCGTTGGACCTTTGGTCGTCAGGACCGGTCCGAAAGATAATGGACGGGCGTCTGGTGGCCCCCGATGCAACGAGCTCTTTCAAAACAGCACGCATCGGTGCGGTCGACAGCCCCGCCCCAAACCCCAATTTTTCTCAGGTTGACCTCGGATCAGGTAGGAATACCCGCTGAACTTAA	FR682340	SH227489.06FU		Saprotroph	Facultative yeast	Fungi	Ascomycota	Eurotiomycetes	Chaetothyriales	Herpotrichiellaceae	Capronia	HQ211570	uncultured_Leotiomyceta
GL02416	ID1YYUI01A33AH	CTAGACTCGTCACCGATGAAGAACGCAGCGAAATGCGATAAGTAATGCGAATTGCAGAATTCAGTGAGTCATCGAATCTTTGAACGCACATTGCGCCCTTTAGTATTCTGAAGGGCATGCCTGTTCGAGCGTCATTATCACTATCCAAGCCCGGCTTGCTGTTGGACACTTTGTCGTTAAAAGACATGTCCTAAAGATAATGACGGTGTCTTTTGGACCCTAAATGCAACGAGCTCTAACCAGCACGCACTTTAGTTGAACCATTAGACCCGGTCTTTTTCCACCAATTTTAAAAGGTTGACCTCGGATCAGGTAGGAATACCCGCTGAACTTAA	KC456719	SH228285.06FU		Saprotroph	Facultative yeast	Fungi	Ascomycota	Eurotiomycetes	Chaetothyriales	Herpotrichiellaceae	Cladophialophora	EU516794	uncultured_fungus
GL25692	IGJRWKL02GGO35	CTAGATCGTAATCGATGAAGAACGCTGCGAAATGCGATAAGTAATGCGAATTGCAGAATTCCAGTGAGTCATCGAATCTTTGAACGCACATTGCGCCCTTTGGTATTCCGAAGGGCATGCCTGTTCGAGCGTCATTATCACCCCTCAAGCCCCGTGCTTGGTGTTGGACGGCTTGGTCGCGTCACCGCGACTCCTCCTAAAGACAATGACGGCGGCCTGTGGTTCCCCCGGTACACTGAGCTTTTATAATTGAGCACGTATTGGATAAGGGCACCCGGGACCCGGTCTTCTCCCTTTACCGGGAAATTTTTCAATGGTTGACCTCGGATCAGGTAGGAATACGCGCTGAACTTAA	GU083193	SH225357.06FU		Saprotroph	Facultative yeast	Fungi	Ascomycota	Eurotiomycetes	Chaetothyriales	Herpotrichiellaceae	Cladophialophora	GU083193	uncultured_soil_fungus
GL26536	IJOVCJS01BSPWH	CTAGATCGTCAACGATGAAGAACGCAGCGAAATGCGATAAGTAATGCGAATTGCAGAATTCCAGTGAGTCATCGAATCTTTGAACGCACATTGCGCCCTTTGGTATTCCGAAGGGCATGCCTGTTCGAGCGTCATTATCACCCCTCAAGCCTTTGTGCTTGGTGTTGGACGGCTTGGTCGCGCCTCGGCTCGACCCCTCCTAAAAACAATGACGGCGGCCTGTGGTTCCCCCGGTACACTGAGCTTTTAACTGAGCACGTGCCGGACAAGGGCGCCCGGGACACGGTCTTCTCCTCATATAAGGAAACTTTTTTTAAGGTTGACCTCGGATCAGGTAGGAATACGCGCTGAACTTAA	EU103998	SH225358.06FU		Saprotroph	Facultative yeast	Fungi	Ascomycota	Eurotiomycetes	Chaetothyriales	Herpotrichiellaceae	Cladophialophora	HQ211510	uncultured_Cladophialophora
GL29864	ID1YYUI01B9LZ0	CTAGACTTGTCAACGATGAAGAACGCAGCGAAATGCGATAAGTAATGCGAATTGCAGAATTCCAGTGAGTCATCGAATCTTTGAACGCACATTGCGCCCTTTGGTATTCCGAAGGGCATGCCTGTTCGAGCGTCATTATCACCCCTCAAGCTTTGTGCTTGGTGTTGGACGGCTTGGTCGCGCTCCGGTTCGACCCCTCCTAAAACAAATGACGGCGGCCTGTGGTTCCCCCGGTACACTGAGCTTTTCACGGAGCACGTATTGGATAAGGGCGCCCGGGACACGGTCTTCTCCTTTTACAAGGAAATTTTCTCAAAAGGTTGACCTCGGATCAGGTAGGAATACGCGCTGAACTTAA	EU139129	SH214962.06FU		Saprotroph	Facultative yeast	Fungi	Ascomycota	Eurotiomycetes	Chaetothyriales	Herpotrichiellaceae	Cladophialophora	HQ211510	uncultured_Cladophialophora
GL34369	ID1YYUI01AQKVO	CTAGACTCGTCACCGATGAAGAACGTAGCGAAATGCGATAAAGTAATGCGAATTGCAGAATTCCAGTGAGTCATCGAATCTTTGAACGCACATTGCGCCCTTTGGTATTCCGAAGGGCATGCCTGTTCGAGCGTCATTATCACCCCTCAAGCCCTGTGCTTGGTGTTGGACGGCCGGTTGAGCGATCGACCCCTCCTAAAGACAATGACGGCGGCCTGCGGTTCCCCCGGTACACTGAGCTTTTCACGGAGCACGTATCGGACAAGGGCACCCGGGACCCGGTCCTCTCCTTTCACAAGGAAACTTCTATGGTTGACCTCGGATCAGGTAGGAATACGCGCTGAACTTAA	AY843171	SH225360.06FU		Saprotroph	Facultative yeast	Fungi	Ascomycota	Eurotiomycetes	Chaetothyriales	Herpotrichiellaceae	Cladophialophora	FM999593	uncultured_fungus
GL38333	ID03IXK02HSIQZ	GGGCATGCCTGTTCGAGCGTCATTATCACTAATCAAGCCCTGCTTGCTGTTGGACCTCTTGTCGTTAAAAGACAGGTCCTAAAGATAATGACGGCGTCAGTTGGACCCTAGATGCAACGAGCTTTAACTAGCACGCTATTTTAGTTGGCCCTTTTGACCCGGTTCTTTTTATAACCTATTTTCTAAGGTTGACCTCGGATCAGGTAGGAATACCCGCCGAACTTAA	AY843164	SH228283.06FU		Saprotroph	Facultative yeast	Fungi	Ascomycota	Eurotiomycetes	Chaetothyriales	Herpotrichiellaceae	Cladophialophora	FR682153	uncultured_Ascomycota
GL39051	IJOVCJS01D87QJ	CTAGACTCGTCAACGATGAAGAACGCAGCGAAATGCGATAAGTAATGCGAATTGCAGAATTCAGTGAGTCATCGAATCTTTGAACGCACATTGCGCCCTTTAGTATTCTGAAGGGCATGCCTGTTCGAGCGTCATTATCACTAATCAAGCCCGGCTTGCTGTTGGACCTCTTGTCGTTAAAAGACAGGCCCCAAAGATAATGACGGCGTCACTTGGACCCTAGATGCAACGAGCTTTCATTAGCACGCATCCTAGTTGTGTCCTTGTGACCCGGTCTAGTTTTAACCAATTTCTTAAGGTTGACCTCGGATCAGGTAGGAATACCCGCTGAACTTAA	AM999594	SH228294.06FU		Saprotroph	Facultative yeast	Fungi	Ascomycota	Eurotiomycetes	Chaetothyriales	Herpotrichiellaceae	Cladophialophora	AM901749	uncultured_Ascomycota
GL22682	ID1YYUI01B6ZHT	CTAGACTCGTCATCGATGAAGAACGCTGCGAAATGCGATAAGTAATGCGAATTGCAGAATTCCAGTGAGTCATCGAATCTTTGAACGCACATTGCGCCCTTTGGTATTCCGAAGGGCATGCCTGTTCGAGCGTCATTATCACCCCTCGAGCCCCTGTGGCTTGGCTTTGGACGGTCTGGTTAGGCGACTGACCCCTCCTAAAGACAATGACGGCGGCCTCGCAGGACCCCCGGTACACTGAGCTTCTTAACTGAGCACGTATCGGATCGAGGGTTCTCGGGGCACGGTCTCCTTTCCCCCCTCCCCTCGGGGCGGTGGGAAAACAATCTTTCTCAGGTTGACCTCGGATCAGGTAGGGATACCCGCTGAACTTAA	HE605213	SH214882.06FU		Saprotroph	Facultative yeast	Fungi	Ascomycota	Eurotiomycetes	Chaetothyriales	Herpotrichiellaceae	Exophiala	HE605254	uncultured_Exophiala
GL30735	IGJRWKL02FTMUI	CTAGACTCGTCATCGATGAAGAACGCTGCGAAATGCGATAAGTAATGCGAATTGCAGAATTCCAGTGAGTCATCGAATCTTTGAACGCACATTGCGCCCTTTGGTATTCCGAAGGGCATGCCTGTTCGAGCGTCATTTTCACCCCTCAAGCCCCCGGCTTGGTGTTGGACGGTTTGGTTTAGGTACCCCTAGACCCCTCCTAAAGACAATGACGGCGGCTGTTGAACCCCCGGTACACTGAGCTTCTTAACTGAGCACGTATCGGATCTAGGGTTTGGCGGCACCCGGTCTATACCTTTTTTGCTTACAAGGTTGACCTCGGATCAGGTAGGAATACCCGCTGAACTTAA	AY857535	SH210377.06FU		Saprotroph	Facultative yeast	Fungi	Ascomycota	Eurotiomycetes	Chaetothyriales	Herpotrichiellaceae	Exophiala	KC311483	Exophiala_xenobiotica
GL30934	ID1YYUI01EJADI	TTGGCTTTGGACGGTCTGGTTAGGCGACTGACCCCTCCTAAAGACAATGACGGCGGCCTCGCAGGACCCCCGGTACACTGAGCTTCTTAACTGAGCACGTATCGGAATGAGGGTTCTCGGGACACGGTCTCCTTTTCCCCCCTCCCTCCCGGGGGCGGTGGGAAAAAATATCTTTCTAAGGTTGACCTCGGATCAGGTAGGGATACCCGCTGAACTTAA	GU225948	SH214884.06FU		Saprotroph	Facultative yeast	Fungi	Ascomycota	Eurotiomycetes	Chaetothyriales	Herpotrichiellaceae	Exophiala	EU689854	uncultured_soil_fungus
GL32967	ID1YYUI01CH2CC	CTAGACTCGTCATCGATGAAGAACGTAGCGAAATGCGATAAGTAATGCGAATTGCAGAATTCTCGTGAGTCATCGAATCTTTGAACGCACATTGCGCCCTTTGGTATTCCGAAGGGCATGCCTGTTCGAGCGTCATTTTCACCCCTCAAGCCCCCGGCTTGGTGTTGGACGGTTTGGTCCAGGGCCCACCCTGGACCCCTCCCAAAGACAATGACGGCGGGCTGTTGCACCCCCGGTACACTGAGCATCTTCACGGAGCACGTACCGGTCTCAAGGGTCGACGGCACCCGGTCTACACCTATATCTTTCACAAGGTTGACCTCGGATCAGGTAGGAATACCCGCTGAACTTAA	JX966554	SH210380.06FU		Saprotroph	Facultative yeast	Fungi	Ascomycota	Eurotiomycetes	Chaetothyriales	Herpotrichiellaceae	Rhinocladiella	KC254071	Rhinocladiella_similis
GL33009	IGJRWKL02GP9RJ	CAGACTCGTCATCGATGAAGAACGCAGCGAAATGCGATAAGTAATGCGAATTGCAGAATCCGTGAGTCATCGAATCTTTGAACGCACATTGCGCCCTTTGGTATTCCGAAGGGCATGCCTGTTCGAGCGTCATTATCACCCCTCAAGCTCCGGCTTGGTGTTGGGCCTGGTCTTTCAGTAGACCGGCCTCAAAGATAGTGACGGCGTCCCAGATGGAACCGGTACGAGGAGCTTCTAATCAAGCATGTACGCGGCGTGAATCTGCGGGCGGCGGTCTTTAACCACTACTCTTCGGAGTACTTTTTTAAGTGTTGACCTCGGATCAGGTAGGGATACCCGCTGAACTTAA	KC965393	SH210137.06FU		Saprotroph	Facultative yeast	Fungi	Ascomycota	Eurotiomycetes	Chaetothyriales	Herpotrichiellaceae		FJ554179	uncultured_Herpotrichiellaceae
GL33140	ID03IXK02JC9TX	GTTCGAGCGTCATTATCACTATTCAAGCTCGGCTTGCTGTTGGACATTTTGTCGTTAAAAGACATGTCCTAAAGATAATGACGGTGTCTTTTGGACCCTAGATGCAACGAGCTTTAACCAGCACGCATTTTAGTTAAACCATTAGACCCGGTCGTTTGTAACCTAATTTTTTTAAGGTTGACCTCGGATCAGGTAGGAATACCCGCTGAACTTAA	KC456719	SH228285.06FU		Saprotroph	Facultative yeast	Fungi	Ascomycota	Eurotiomycetes	Chaetothyriales	Herpotrichiellaceae		GU366669	uncultured_fungus
GL33330	IGJRWKL02G8Z1B	CTAGACTCGTCAACGATGAAGAACGCAGCGAAATGCGATAAGTAATGCGAATTGCAGAATTCCAGTGAGTCATCGAATCTTTGAACGCACATTGCGCCCTTTGGTATTCCGAAGGGCATGCCTGTTCGAGCGTCATTTACACCCCTCAAGCCTAGCTTGGTGTTGGACGGTTGGTCGTAGTCCTTATGACCCCTCCTAAAGTCAATGACGGCGGCCTGTTGAACCCCCGGTACACTGAGCTTCTTTATTGAGCACGTATCGGTTCCAAGGGTGGCAGACGTCGGTCCTCTTCCTTCACCGGAAACTTCTCAAGGTTGACCTCGGATCAGGTAGGAATACCCGCTGAACTTAA	KF385366	SH211543.06FU		Saprotroph	Facultative yeast	Fungi	Ascomycota	Eurotiomycetes	Chaetothyriales	Herpotrichiellaceae		EU917110	uncultured_fungus
GL33796	ID1YYUI01C4XU6	GTATTCTGAAGGGCATGCCTGTTCGAGCGTCATTATCACTAATCAAGCCCGGCTTGCTGTTGGACCCATTTTTGTCGTGAAAAACGACAGGTCCAAAAGATAATGACGGTGTTATTTGGACCCTAGATGCAACGAGCTTTTATTAGCACGCGTTTAGTAGGACCTTTTAACCCGGTCTCTTTAACCATTTTTCTAAGGTTGACCTCGGATCAGGTAGGAATACCCGCTGAACTTAA	UDB004109	SH228298.06FU		Saprotroph	Facultative yeast	Fungi	Ascomycota	Eurotiomycetes	Chaetothyriales	Herpotrichiellaceae		JX915591	uncultured_fungus
GL34674	ID03IXK02JF12F	ACACTCGTCTAGACTCGTCAACGATGAAGAACGCAGCGAAATGCGATAAGTAATGCGAATTGCAGAATTCAGTGAGTCATCGAATCTTTGAACGCACATTGCGCCCTTTAGTATTCTGAAGGGCATGCCTGTTCGAGCGTCATTATCACTAATCAAGCCCGGCTTGCTGTTGGACCTCTTGTCGTCAAAAGACAGGCCCCAAAGATAATGACGGTGTTATTAGAACCCTAGATGCAACGAGCTTTAACCAGCACGCATGATAGTGGCCTTTTAACCCGGTCTTTTTTAACCATTTTTTAATGTTGACCTCGGATCAGGTAGGAATACCCGCTGAACTTAA	AM999700	SH228290.06FU		Saprotroph	Facultative yeast	Fungi	Ascomycota	Eurotiomycetes	Chaetothyriales	Herpotrichiellaceae		FJ475736	uncultured_Herpotrichiellaceae
GL39449	ID03IXK02F6C3M	CTAGACTCGTCATCGATGAAGAACGCAGCGAAATGCGATAAGTAATGCGAATTGCAGAATTCAGTGAGTCATCGAATCTTTGAACGCACATTGCGCCCTTTAGTATTCTGAAGGGCATGCCTGTTCGAGCGTCATTATCACTAATCAAGCCTGGCTTGCTGTTGGATCTCTTGTCGTTAAAAGACAGGTCCCAAAGATAATGACGGTGTCAGTTGGACCCTAGATGCAACGAGCTTTAACTAGCACGCATCTTAGTGGGCCTTTTGACCCGGTCTCTTTTAACCAATTTTTTTAAGGTTGACCTCGGATCAGGTAGGAATACCCGCTGAACTTAA	AY843164	SH228283.06FU		Saprotroph	Facultative yeast	Fungi	Ascomycota	Eurotiomycetes	Chaetothyriales	Herpotrichiellaceae		FJ553946	uncultured_Herpotrichiellaceae
GL44354	ID03IXK02HRAMS	ACATTGCGCCCTTTGGTATTCCGAAGGGCATGCCTGTTCGAGCGTCATTATCAACCATCAAGCCTGGCTTGTCGTTGGACCTTTGGTCGTGTGACCGGTCCGAAAGATAATGGACGGGTGCCTAGTAACCCTAGATGCAACGAGCTTTCTACAGCACGCATCGACGGGTCGGTAGCCCCGCCCCAAACCCCATTTTTTCAGGTTGACCTCGGATCAGGTAGGAATACCCGCTGAACTTAA	FR682340	SH227489.06FU		Saprotroph	Facultative yeast	Fungi	Ascomycota	Eurotiomycetes	Chaetothyriales	Herpotrichiellaceae		AM902024	uncultured_Ascomycota
GL29228	IGJRWKL02IE7U8	ATGCGAATTGCAGAATTTCCGTGAGTCATCGAATCTTTGAACGCACATTGCGCCCTTTGGCATTCCGAAGGGCATGCCTGTTCGAGCGTCATTATCCTCCCTCAAACCCCCGGGTTTGGTGTTGGGCCGCGTTGGCACCGTTCGCGGTCCAACTGGTCTCAAAGACAATGACGGCGTCCGTGGGACCCTCTTCGCACTGAGCTTTCCGGAGCACGCGTCGAGTTGCAAGGTCGCACGGGCCCGGTCACCTATCGTACTTCGGTACCATATTTTTTCAGGTTGACCTCGGATCAGGTAGGAATACCCGCTGAACTTAA	JX313656	SH201526.06FU		Endophyte		Fungi	Ascomycota	Eurotiomycetes	Chaetothyriales	Trichomeriaceae	Trichomerium	AJ582964	uncultured_fungus
GL35683	ID1YYUI01BB8C3	CTAGACTCGTCATCGATGAAGAACGCAGCGAAATGCGATAAGTAATGCGAATTGCAGAATTTCCGTGAGTCATCGAATCTTTGAACGCACATTGCGCCCACTGGTATTCCGGTGGGCATGCCTGTTCGAGCGTCATTATCCTCCCTCAAACCTCTGTGTTTGGTGTTGGGCCGCGTTGGCGTCACAGCCAACTGGTCTCAAAGACAATGACGGCGTCCGTGGGACCCTCTTCGCAACGAGCATCTTCGGAAGCACGCGTCGAGTCTAAAGGACCTTCCGGGCCGGTCTACCCTTTATCTTTCTAAGGTTGACCTCGGATCAGGTAGGAATACCCGCTGAACTTAA	JN650519	SH217845.06FU		Saprotroph	Facultative yeast	Fungi	Ascomycota	Eurotiomycetes	Chaetothyriales		Sarcinomyces	JQ061172	Sarcinomyces_sp_SL_2011
GL02470	ID1YYUI01CFE1A	CTAGACTCGTCATCGATGAAGAACGCTGCGAAATGCGATAAGTAATGCGAATTGCAGAATTCAGTGAGTCATCGAATCTTTGAACGCACATTGCGCCCTTTAGTATTCTGAAGGGCATGCCTGTTCGAGCGTCATTATCACTAATCAAGCACGGCTTGCTGTTGGACCTCATGTCGTTAAAAAGACAGGCCCCAAAGATAATGACGGTGTCAGTTGGACCCCTAGATGCAACGAGCTTTAACTAGCACGCATTATAGTGGCCTGTTGACCCGGTCTTTTTAACCAATTTCTTAAGGTTGACCTCGGATCAGGTAGGAATACCCGCTGAACTTAA	AY843164	SH228283.06FU		Saprotroph		Fungi	Ascomycota	Eurotiomycetes	Chaetothyriales			FJ008681	Ascomycota_sp_CH_Ce8LBMM
GL24430	ID1YYUI02GVBKV	CTAGACTCGTCAACGATGAAGAACGCAGCGAAATGCGATAAGTAATGCGAATTGCAGAATTCCAGTGAGTCATCGAATCTTTGAACGCACATTGCGCCCTTTGGTATTCCGAAGGGCATGCCTGTTCGAGCGTCATTATCACCCCTCAAGCCCTCGGCTTGGTGTTGGACGGTTTGGTGGAGACCCCCCTCGGGCGGGCTTCTACCCCTCCCAAAGACAATGACGGCGGCCTCGTTGGACCCCCGGTACACTGAGTTCTTCACGGGACACGTATCGGACACATGGGTTTACGGGACACGGTCTGCCTCCCCTCAGGGAGAATCTTTTTTATCAAGGTTGACCTCGGATCAGGTAGGGATACCCGCTGAACTTAA	FM172777	SH230196.06FU		Saprotroph		Fungi	Ascomycota	Eurotiomycetes	Chaetothyriales			FJ197960	uncultured_Exophiala
GL31241	ID1YYUI01D0FLS	CTAGACTCGTCATCGATGAAGAACGCAGCGAAATGCGATAAGTAATGCGAATTGCAGAATTCAGTGAGTCATCGAATCTTTGAACGCACATTGCGCCCTTTGGCATTCCGAAGGGCATGCCTGTTCGAGCGTCATTATCACCCCTCAAGCTTGGCTTTGTGTTTGACTTTTTCTACGGGCCTCCGGGCCCGGGTCCCAAAGATAATGACAGGCTTGACGGAAGCCTCGGTACAATGAGTCTTGCACAAGGCACGTATCGCAGTTTGTTTCTGTCCGGCTTGGTCTTAACCACAAATTTTTCTAAGGTTGACCTCGGATCAGGTAGGAATACCCGCTGAACTTAA	DQ914677	SH231140.06FU		Saprotroph		Fungi	Ascomycota	Eurotiomycetes	Chaetothyriales			HQ701750	uncultured_fungus
GL34209	ID03IXK02IFD4E	CTAGACTCGTCATCGATGAAGAACGCTGCGAAATGCGATAAGTAATGCGAATTGCAGAATTCAGTGAGTCATCGAATCTTTGAACGCACATTGCGCCCTTTAGTATTCTGAAGGGCATGCCTGTTCGAGCGTCATTATCACTAATCAAGCCCGGCTTGCTGTTGGACCTTTTGTCGTAAAAAGACAGGCCCTAAAGATAATGACGGTGTCTTTTTGACCCTAGATACAACGAGCTTTAATTAGCACGTATCTATAGTGGACTTTTGGACCCGGTCTTTTGTAACCAATTTTTTCAGGTTGACCTCGGATCAGGTAGGAATACCCGCTGAACTTAA	AY843164	SH228283.06FU		Saprotroph		Fungi	Ascomycota	Eurotiomycetes	Chaetothyriales			FJ008681	Ascomycota_sp_CH_Ce8LBMM
GL35032	ID1YYUI01CFHYR	CTAGACTCGTCATCGATGAAGAACGCTGCGAAATGCGATAAGTAATGCGAATTGCAGAATTTCCGTGAGTCATCGAATCTTTGAACGCACATTGCGCCCTTTGGCATTCCGAAGGGCATGCCTGTTCGAGCGTCATTATCCTCTCTCAAACCCCGTGTTTGGTGTTGGACCGCGTTGGACCGCCTATGGCCAACTGGTCTCAAAGACAATGACGGCGTCCCCGGGACCCTCTTCGCACTGAGTTCTCCGGAGCACGCGTAGAGTTTCAAGGGCCCAGGGACCCGGTCGCCTCTAAAATTATTTATCAGGTTGACCTCGGATCAGGTAGGAATACCCGCTGAACTTAA	GU055939	SH228411.06FU		Saprotroph		Fungi	Ascomycota	Eurotiomycetes	Chaetothyriales			JX014309	Chaetothyriales_sp_F1
GL35694	IGJRWKL02GMBSE	CTAGACTCGTCATCGATGAAGAACGCTGCGAAATGCGATAAGTAATGCGAATTGCAGAATTTCCGTGAGTCATCGAATCTTTGAACGCACATTGCGCCCACTGGTATTCCGGTGGGCATGCCTGTTCGAGCGTCATTATCCTCCCTCAAACCCCGGGTTTGGTGTTGGACCGAAGTTGTGTGAACAACTGGTCTAAAAGACAATGACGGCGTCCGTGGGACCCTCGGTGCAACGAGCTTTTAGGAGCACGCGCCGAGTTGCAAGGACCTTCCGGGCCGGTCTCCTTTTACTATTTTACAAGGTTGACCTCGGATCAGGTAGGAATACCCGCTGAACTTAA	DQ421061	SH209738.06FU		Saprotroph		Fungi	Ascomycota	Eurotiomycetes	Chaetothyriales			GU187867	uncultured_fungus
GL37765	ID03IXK02GU54U	CTAGACTCGTCAACGATGAAGAACGCAGCGAAATGCGATAAGTAATGCGAATTGCAGAATTCAGTGAGTCATCGAATCTTTGAACGCACATTGCGCCCTTTGGCACTCCGAAGGGCATGCCTGTTCGAGCGTCATTATCAACCATCAAGCCTGGCTTGTCGTTGGACCCTTTTGTCGGTGAGACACCCGACAGGTCCGAAAGATAGTGACGGTGTCGTGTTTGACCCTAGATGCAACGAGCTTTTATAGCACGCATTGAAGTGGTCGGTCGGCCCGGTCTTTACCATCAAATTTCTCAAGGTTGACCTCGGATCAGGTAGGAATACCCGCTGAACTTAA	AM999549	SH226546.06FU		Saprotroph		Fungi	Ascomycota	Eurotiomycetes	Chaetothyriales			FR682319	uncultured_Ascomycota
GL37814	ID1YYUI01CD7X7	CTAGACTCGTCATCGATGAAGAACGCAGCGAAATGCGATAAGTAATGCGAATTGCAGAATTCAGTGAGTCATCGAATCTTTGAACGCACATTGCGCCCTTTAGTATTCTGAAGGGCATGCCTGTTCGAGCGTCATTATCACTAATCAAGCCTGGCTTGCTGTTGGACCTCTTGTCGTTAAAGCGACAGGTCCTAAAGACAATGACGGTTGTTAATTAGACCCCAGATGCAACGAGCTTTCATTAGCACGCATGATAGGTGGCCTTTTTAACCCGGTCTTTTTTAACCAATTTTACAAGGTTGACCTCGGATCAGGTAGGAATACCCGCTGAACTTAA	EF373582	SH228288.06FU		Saprotroph		Fungi	Ascomycota	Eurotiomycetes	Chaetothyriales			FJ008678	Ascomycota_sp_CH_Co12
GL38285	ID03IXK02GN2OO	CTAGACTCGTCATCGATGAAGAACGCTGCGAAATGCGATAAGTAATGCGAATTGCAGAATTCAGTGAGTCATCGAATCTTTGAACGCACATTGCGCCCTTTGGTATTCCGAAGGGCATGCCTGTTCGAGCGTCATTATCAACTATCAAGCCTGGCTTGTCGTTGGACTCCTTTGTCGTCGAGAGCCGACAGGTCCGAAAGATAATGACGGTGTCGTGTTTGACCCTAGATGCAACGAGCTTTTATAGCACGCATTGATGTGGTCGGGCGGCCCGGTCTTAAACCCCCCATTTTCTTAAGGTTGACCTCGGATCAGGTAGGAATACCCGCTGAACTTAA	JN053150	SH231420.06FU		Saprotroph		Fungi	Ascomycota	Eurotiomycetes	Chaetothyriales			FR682254	uncultured_Ascomycota
GL39842	ID03IXK02GRYEV	CTAGACTCGTCATCGATGAAGAACGCTGCGAAATGCGATAAGTAATGCGAATTGCAGAATTCAGTGAGTCATCGAATCTTTGAACGCACATTGCGCCCTTTGGTATTCCGAAGGGCATGCCTGTTCGAGCGTCATTATCAACCCTCAAGCCTGGCTTGTAGTTGGACCTCCGTCGTCACAGACGGGTCCCAAAGACAATGACGGAGTCGTGTCGGACCCCAGATGCAACGAGCTTTTTAAGCACGCATTGAAGTGGCCGACCATTCTGGTCTTTTAACCACGTGTTTTACAACAAGGTTGACCTCGGATCAGGTAGGAATACCCGCTGAACTTAA	KC965971	SH236311.06FU		Saprotroph		Fungi	Ascomycota	Eurotiomycetes	Chaetothyriales			JF691086	uncultured_Chaetothyriales
GL40367	ID1YYUI01EHW97	CTAGACTCGTCATCGATGAAGAACGTAGCGAAATGCGATAAGTAATGCGAATTGCAGAGCAGTGAGTCATCGAATCTTTGAACGCACATTGCGCCCTTTGGTATTCCGAAGGGCATGCCTGTTCGAGCGTCATTAACAACCTTCAAGCCAGGCTTGCTGTTGGATCACATCGTTAAATGGATGGATCCCAAAGATAATGACGGAGTCTGTGTCAGATCCTAGATGCAATGAGCTTTTATTAGCACGCATCCAAGGGACTGACTGACCTGGTCTTAACAACTATTTATTCTAATGTTGACCTCGGATCAGGTAGGAATACCCGCTGAACTTAA	UDB004173	SH236313.06FU		Saprotroph		Fungi	Ascomycota	Eurotiomycetes	Chaetothyriales			FN298754	uncultured_fungus
GL40553	IJOVCJS01D83YX	CTAGACTCGTCATCGATGAAGAACGCAGCGAAATGCGATAAGTAATGCGAATTGCAGAATTCAGTGAGTCATCGAATCTTTGAACGCACATTGCGCCCTTTGGTATTCCGAAGGGCATGCCTGTTCGAGCGTCATTATCGACCCTCAAGCCTAGCTTGTTGTTGGACCTTTCGTCGTCAAAGACGGGTCCCAAAGACAATGACAGAGTCTATCGGATTCTAGATGCAACGAGCTTTCAATAGCACGCATTGAAGTAGCCGGTGGCTTTGGTCTCAAAACCGATTTTTTTACAAGGTTGACCTCGGATCAGGTAGGAATACCCGCTGAACTTAA	KC965971	SH236311.06FU		Saprotroph		Fungi	Ascomycota	Eurotiomycetes	Chaetothyriales			HQ211630	uncultured_Leotiomyceta
GL40955	ID1YYUI01DDF8R	CTAGACTCGTCAACGATGAAGAACGCAGCGAAATGCGATAAGTAATGCGAATTGCAGAATTCAGTGAGTCATCGAATCTTTGAACGCACATTGCGCCCTTTAGTATTCTGAAGGGCATGCCTGTTCGAGCGTCATTATCACGAATCAAGCCTGGCTTGCTGTTGGACCTCTTGTCGTTGAAAGACAGGCCCTAAAGATAATGACGGTGTCAGTTGGACCCTAGATGCAACGAGCTTTAACTAGCACGCATGTTAGTGGCCTTCTGACCCGGTCTTTTATAACCCATTTCTTAAGGTTGACCTCGGATCAGGTAGGAATACCCGCTGAACTTAA	FJ008679	SH228302.06FU		Saprotroph		Fungi	Ascomycota	Eurotiomycetes	Chaetothyriales			FJ008683	Ascomycota_sp_CH_Ce12
GL41975	IJOVCJS01AQN0D	CTTAGACTCGTCACCGATGAAGAACGCAGCGAAATGCGATAAGTAATGCGAATTGCAGAATTCAGTGAGTCATCGAATCTTTGAACGCACATTGCGCCCTTTGGTATTCCGAAGGGCATGCCTGTTCGAGCGTCATTATCAACCATCAAGCCTGGCTTGTTGTTGGACCTTTCGTCGTTAAAGACGGGTCCCAAAGACAATGACGGAGTCTGTCGGACCCTTAGATGCAACGAGCTTTCAATAGCACGCATTGAAGCGGCCGGTGACTTTGGTCCCAACCGATATTTTCATAAGGTTGACCTCGGATCAGGTAGGAATACCCGCTGAACTTAA	KC965971	SH236311.06FU		Saprotroph		Fungi	Ascomycota	Eurotiomycetes	Chaetothyriales			AM999747	uncultured_fungus
GL28100	IGJRWKL02IGTEC	CTAGACTCGTCACCGATGAAGAACGCAGCGAAATGCGATAAGTAATGTGAATTGCAGAATTCCGTGAATCATCGAATCTTTGAACGCATATTGCGCCCTCTGGTATTCCAGAGGGCATGCCTGTCCGAGTGTCATTGCCTCCCTCCAAGCCGAGCTTGGGCGTTGGGCTGTCGTCCCCCTCCGGCCACGGGGCTGGGACGGGCCTGAAAGACAACGGCGGTGTGACGGTCAATCCCCGAGCGTATGGGCTTCCCCCGCTTGATGGGTTTGATGGGCACTTGCATTTCCCCTGCAGTGTTGACTCCAGTGGACCTCGGATCAGGTAAGGATACCCGCTGAACTTAA	NR_103623	sequence missing from global key	elaphomyces	EcM		Fungi	Ascomycota	Eurotiomycetes	Eurotiales	Elaphomycetaceae	Elaphomyces	JF907988	Elaphomyces_maculatus
GL35533	IJOVCJS01BQBTT	CTAGACTCGTCATCGATGAAGAACGCAGCGAAATGCGATAAGTAATGTGAATTGCAGAATTCCGTGAATCATCGAATCTTTGAACGCATATTGCGCCCTCTGGTACTCCAGAGGGCATGCCTGTCCGAGTGTCATTGCCTCTCTCCAAGCCGAGCTTGGGTGTTGGGCTGTCGTCCCCTCCCCGGCTGCGGGGCTGGGACGGGCCTGAAAGACAACGGCGGTGTCACGGTCAAATCTCCGAGCGTATGGGCTTTTCCCCGCTCCATGGGTTTGATGGGCGCCTGCCTCCCTGCAGTGTCGACTCCAGTGGACCTCGGATCAGGTAAGGATACCCGCTGAACTTAA	JF417489	SH195623.06FU	elaphomyces	EcM		Fungi	Ascomycota	Eurotiomycetes	Eurotiales	Elaphomycetaceae	Elaphomyces	JF907987	Elaphomyces_leveillei
GL29459	ID1YYUI02IAO5Y	GGTATTCCGGGGGGTATGCCTGTCCGAGCGTCATTGCTGCCCTCAAGCACGGCTTGTGTGTTGGGTCGTCGTCCCCCCGGGGACGGGCCCGAAAGGCAGCGGCGGCACCGCGTCCGGTCCTCGAGCGTATGGGGCTTTGTCACACCGCTCTTGTAGGCCCGGCCGGCTGCTGGCCGACGCTGAAAAGCAACCAACTATTTCTCCAGGTTGACCTCGGATCAGGTAGGGATACCCGCTGAACTTAA	FJ491578	SH231999.06FU		Saprotroph		Fungi	Ascomycota	Eurotiomycetes	Eurotiales	Trichocomaceae	Aspergillus	KC253959	Aspergillus_melleus
GL31962	ID1YYUI01ALEEC	CTAGACTCGTCACCGATGAAGAACGCAGCGAAATGCGATACGTAATGTGAATTGCAGAATTCAGTGAATCATCGAGTCTTTGAACGCACATTGCGCCCTCTGGTATTCCGGGGGGCATGCCTGTCCGAGCGTCATTGCTGCCCTCAAGCACGGCTTGTGTGTTGGGCCCCCGTCCCGGTTAAGCATCAGCCCCGGGACGGGCCCGAAAGGCAGCGGCGGCACCGTGTCCGGTCCTCGAGCGTATGGGGCTCTGTCACCCGCTCGTGTAGGTCCGGCCGGCGGCCAGCCCGACCCTTTAACCAATCTTTTAACCAGGTTGACCTCGGATCAGGTAGGGATACCCGCTGAACTTAA	EF652046	SH219428.06FU		Saprotroph		Fungi	Ascomycota	Eurotiomycetes	Eurotiales	Trichocomaceae	Aspergillus	JX156358	Aspergillus_vitricola
GL32085	ID03IXK02G2ZD6	CCGAGCGTCATTGCTGCCCATCAAGCCCGGCTTGTGTGTTGGGTCGTCGTCCCCCCCGGGGGACGGGCCCGAAAGGCAGCGGCGGCACCGTGTCCGGTCCTCGAGCGTATGGGGCTTTGTCACCCGCTCGATTTAGGGCCGGCCGGGCGCCAGCCGACGTCCAACCATTTTTCTTCAGGTTGACCTCGGATCAGGTAGGGATACCCGCTGAACTTAA	FJ537130	SH206402.06FU		Saprotroph		Fungi	Ascomycota	Eurotiomycetes	Eurotiales	Trichocomaceae	Aspergillus	KC506195	fungal_sp_AM2013
GL36788	ID1YYUI01B87D3	CTAGACTCGTCATCGATGAAGAACGTAGCGAAATGCGATAATTAATGTGAATTGCAGAATTCAGTGAATCATCGAGTCTTTGAACGCACATTGCGCCCCCTGGTATTCCGGGGGGCATGCCTGTCCGAGCGTCATTGCTGCCCTCAAGCACGGCTTGTGTGTTGGGCTTCCGTCCCTGGTAACGGGGACGGGCCCAAAAGGCAGTGGCGGCACCATGTCTGGTCCTCGAGCGTATGGGGCTTTGTCACCCGCTCCCGTAGGTCCAGCTGGCAGCTAGCCTCGCAACCAATCTTTTTAACCAGGTTGACCTCGGATCAGGTAGGGATACCCGCTGAACTTAA	DQ132811	SH236881.06FU		Saprotroph		Fungi	Ascomycota	Eurotiomycetes	Eurotiales	Trichocomaceae	Eurotium	U18357	Eurotium_rubrum
GL03858	ID1YYUI02J0HXX	ATCTAGACTCGTCATCGATGAAGAACGCTGCGAAATGCGATACGTAATGTGAATTGCAGAATTCAGTGAATCATCGAGTCTTTGAACGCACATTGCGCCCTCTGGTATTCCGGAGGGCATGCCTGTCCGAGCGTCATTGCTGCCCTCAAGCACGGCTTGTGTGTTGGGCCCCGTCCTCCTTCCGGGGGACGGGTCCGAAAGGCAGCGGCGGCACCGCGTCCGGTCCTCAAGCGTATGGGGCTTTGTCACTCGCTTTGTAGGCCTGGCCGGCGCTTGCCGATCAACCAAACTTTTTATCAGGTTGACCTCGGATCAGGTAGGGATACCCGCTGAACTTAA	EU587315	SH193630.06FU		Saprotroph		Fungi	Ascomycota	Eurotiomycetes	Eurotiales	Trichocomaceae	Penicillium	KC143755	uncultured_Penicillium
GL24231	ID1YYUI01D9BDH	CTAGACTCGTCACCGATGAAGAACGCAGCGAAATGCGATAACTAATGTGAATTGCCGAATTCAGTGAATCATCGAGTCTTTGAACGCACATTGCGCCCCCTGGTATTCCGGGGGGCATGCCTGTCCGAGCGTCATTGCTGCCCTCAAGCACGGCTTGTGTGTTGGGCTCCGTCCCCCCGGGGACGGGTCCGAAAGGCAGCGGCGGCACCGAGTCCGGTCCTCGAGCGTATGGGGCTTTGTCACCCGCTCTGTAGGCCCGGCCGGCGCCAGCCGACAACCAATCATCCTTTTTTCAGGTTGACCTCGGATCAGGTAGGGATACCCGCTGAACTTAA	AY373933	SH231533.06FU		Saprotroph		Fungi	Ascomycota	Eurotiomycetes	Eurotiales	Trichocomaceae	Penicillium	NR077159	Penicillium_thomii
GL25149	ID1YYUI01BPCWB	CTAGACTCGTCATCGATGAAGAACGCTGCGAAATGCGATACGTAATGTGAATTGCAGAATTCAGTGAATCATCGAGTCTTTGAACGCACATTGCGCCCCCTGGTATTCCGGGGGGCATGCCTGTCCGAGCGTCATTGCTGCCCTCAAGCCCGGCTTGTGTGTTGGGTCTCGTCCCCCTTCCCGGGGGGACGGGCCCGAAAGGCAGCGGCGGCACCGCGTCCGGTCCTCGAGCGTATGGGGCTTTGTCACCCGCTCTGTAGGCCCGGCCGGCGCTTGCCGATCAACCAAAACTTTTTTCCAGGTTGACCTCGGATCAGGTAGGGATACCCGCTGAACTTAA	FJ791141	SH231334.06FU		Saprotroph		Fungi	Ascomycota	Eurotiomycetes	Eurotiales	Trichocomaceae	Penicillium	KC007321	Penicillium_sp_O_2_BESC_883f
GL31707	IGJRWKL02HSUSK	TCGGCATTCCGGGGGGCGATGCCTGTCCGAGCGTCATTTCTGCCCTCCAGCACGGCTGGGTGTTGGGCGCTGTCCCCCCGGGGACACGCCCCAAAGGCAGTGGCGGCGCCGCATCGGGTCCTCGAGCGTATGGGGCTTTGTCACCCGCTCGGGAGGGACTCGTCGGCGCTGGTCTTCCCCCAGGCGACCCTTCGGGGCTCGTCTTCTTCCGGTTGACCTCGGATCAGGTAGGGTTACCCGCTGAACTTAA	KF196906	SH210332.06FU		Saprotroph		Fungi	Ascomycota	Eurotiomycetes	Eurotiales	Trichocomaceae	Penicillium	HQ149328	Penicillium_phialosporum
GL31993	IGJRWKL02HAHLQ	CTACACTCGTCATCGATGAAGAACGCTGCGAAATGCGATAACTAATGTGAATTGCAGAATTCAGTGAATCATCGAGTCTTTGAACGCACATTGCGCCCCCTGGTATTCCGGGGGGCATGCCTGTCCGAGCGTCATTGCTGCCCTCAAGCCCGGCTTGTGTGTTGGGCCCTGTCCCCCTCTCCGGGGGACAGGCCCGAAAGGCAGCGGCGGCACCGAGTCCGGTCCTCGAGCGTATGGGGCTTTGTCACCCGCTCTGTAGGCCCGGCCGGCGCCAGCCGACAACCCATCATCCTTTTCAGGTTGACCTCGGATCAGGTAGGGATACCCGCTGAACTTAA	AY373922	SH213203.06FU		Saprotroph		Fungi	Ascomycota	Eurotiomycetes	Eurotiales	Trichocomaceae	Penicillium	HM439543	fungal_sp_900_YZ_2011
GL32440	IGJRWKL02HVH1Y	CCTGGCATTCCGGGGGGCATGCCTGTCCGAGCGTCATTTCTGCCCTCAAGCACGGCTTGTGTGTTGGGTGTGGTCCCCTCCCTGGCGGGGGGACCTGCCCGAAAGGCAGCGGCGACGTCGCGTCCGGTCCTCGAGCGTATGGGGCTTTGTCACTCGCTCGGGAAGGACCTGCGCACGTCTGTCACAACTGTATTTTTTACCACGGTTGACCTCGGATCAGGTAGGAGTTACCCGCTGAACTTAA	AY787844	SH218647.06FU		Saprotroph		Fungi	Ascomycota	Eurotiomycetes	Eurotiales	Trichocomaceae	Penicillium	GQ851882	uncultured_fungus
GL33367	ID03IXK02H329A	TAGACTCGTCACCGATGAAGAACGCAGCGAAACTGCGATAATTAATGTGAATTGCAGAATTCAGTGAATCATCGAGTCTTTGAACGCACATTGCGCCCTCTGGTATTCCGGAGGGCATGCCTGTCCGAGCGTCATTGCTGCCCTCAAGCACGGCTTGTGTGTTGGGCCCTCGTCCCCCCGGGGACGGGCCCGAAAGGCAGCGGCGGCACCGCGTCCGGTCCTCGAGCGTATGGGGCTTCGTCACCCGCTCGTTAGGCCCGGCCGGCGCCAGCCGACCCCCCCTCAATCTTTAACCAGGTTGACCTCGGATCAGGTAGGGATACCCGCTGAACTTAA	DQ480346	SH201042.06FU		Saprotroph		Fungi	Ascomycota	Eurotiomycetes	Eurotiales	Trichocomaceae	Penicillium	JN851050	Penicillium_paxilli
GL34848	ID03IXK02H801U	CTAGACTCGTCATCGATGAAGAACGCTGCGAAATGCGATACGTAATGTGAATTGCAGAATTCAGTGAATCATCGAGTCTTTGAACGCACATTGCGCCCCTTGGTATTCCGGGGGGCATGCCTGTCCGAGCGTCATTGCTGCCCTCAAGCACGGCTTGTGTGTTGGGCTCCGTCCTCCTTCCCGGGGGACGGGCCCGAAAGGCAGCGGCGGCACCGCGTCCGGTCCTCGAGCGTATGGGGCTTCGTCTTCCGCTCTTGTAGGCCCGGCCGGCGCTTGCCGACAACAAATCAATCTTTTTTCAGGTTGACCTCGGATCAGGTAGGGATACCCGCTGAACTTAA	AY141178	SH234293.06FU		Saprotroph		Fungi	Ascomycota	Eurotiomycetes	Eurotiales	Trichocomaceae	Penicillium	NR077155	Penicillium_melinii
GL39399	ID03IXK02I2PGE	TAGACTCGTCATCGATGAAGAACGCTGCGAAATGCGATAAATAATGTGAATTGCAGAATTCAGTGAATCATCGAGTCTTTGAACGCACATTGCGCCCCCTGGTATTCCGGGGGGCATGCCTGTCCGAGCGTCATTGCTGCCCTCAAGCCCGGCTTGTGTGTTGGGTCCTAGTCCTTAGGGACAGGCCCGAAAGGCAATGGCAGTACCGCGTCCGGTCCTCGAGCGTATGGGGCTTTGTCACCCGCTCTGTAGGCCCGGCCGGCGCTCCGCCGACCAACCAAAAAACTATTTTTCAGGTTGACCTCGGATCAGGTAGGGATACCCGCTGAACTTAA	AF454082	SH230915.06FU		Saprotroph		Fungi	Ascomycota	Eurotiomycetes	Eurotiales	Trichocomaceae	Penicillium	FR717224	Thysanophora_penicillioides
GL35271	IGJRWKL02HJXHH	CTAGACTCGTCATCGATGAAGAACGTAGCGAAATGCGATAAGTAATGTGAATTGCAGAATTCCGTGAATCATCGAATCTTTGAACGCACATTGCGCCCCCTGGCATTCCGGGGGGCATGCCTGTCCGAGCGTCATTTCTGCCCTCAAGCACGGCTTGTAGTGTTGGGTGTGGTCCCCCCGGGGACCTGCCCGAAAGGCAGCGGCGACGTCCGTCTGGTCCTCGAGCGTATGGGGCTTTGTCACTCGCTCGGGAAGGACCTGCGGGGGTTGGTCACCACCATATTTTACCACGGTTGACCTCGGATCAGGTAGGAGTTACCCGCTGAACTTAA	EU330619	SH225847.06FU		Saprotroph		Fungi	Ascomycota	Eurotiomycetes	Eurotiales	Trichocomaceae	Talaromyces	JN899319	Talaromyces_calidicanius
GL37089	IGJRWKL02IQIDL	CTAGACTCGTCATCGATGAAGAACGCTGCGAAATGCGATAAGTAATGTGAATTGCAGAATTCCGTGAATCATCGAATCTTTGAACGCACATTGCGCCCCCTGGCATTCCGGGGGGCATGCCTGTCCGAGCGTCATTTCTGCCCTCAAGCGCGGCTTGTGTGTTGGGCGTGGTCCCCCTGGCTTTGGCGGGGACCTGCCCGAAAGGCAGCGGCGACGTCCCGCCTAGTCCTCGAGCGTATGGGGCTCTGTCACGTGCTCGGGAGGGACTGGTGGGCGTTGGTCACCCCTTATTCTTTCTACGGTTGACCTCGGATCAGGTAGGAGTTACCCGCTGAACTTAA	GU973715	SH225848.06FU		Saprotroph		Fungi	Ascomycota	Eurotiomycetes	Eurotiales	Trichocomaceae	Talaromyces	JF714646	Talaromyces_trachyspermus
GL34865	ID1YYUI02HGDFZ	CTAGACTCGTCACCGATGAAGAACGCAGCGAAATGCGATAAGTAATGTGAATTGCAGAATTCCGTGAATCATCGAATCTTTGAACGCACATTGCGCCCTCTGGTATTCCGGGGGGCATGCCTGTCCGAGCGTCATTGCGAACCCTCAAGCACGGCTTGTGTGTTGGGCCGCCGTCCCCTCGTTTGGAGGGGACGGGCCTGAAAGGCAGCGGCGGCGTCGCGTCCGGTCCTCGAGCGTATGGGGCTCTGTCACGCGCTCAAGGAGGGGTCCGGCCGGGGCCATAGCCTCTGAAGGTCAATTCTTCCAAGGTTGACCTCGGATCAGGTAGGAGTACCCGCTGAACTTAA	JN659457	SH198685.06FU		Saprotroph		Fungi	Ascomycota	Eurotiomycetes	Eurotiales	Trichocomaceae	Thermomyces	JQ898126	Thermomyces_sp_BR
GL40296	IGJRWKL02IBSWH	CTAGACTCGTCACCGATGAAGAACGCAGCGAAATGCGATAAGTAATGTGAATTGCAGAATTCAGTGAATCATCGAGTCTTTGAACGCACATTGCGCCCTCTGGTATTCCGGAGGGCATGCCTGTCCGAGCGTCATTACTGCCCTCAAGCCCGGCTTGGTGTTGGGTGCCGTCCCCTTGGGACGCGCCTGAAAGGCAGCGGCGGCACTGCGTCTGGTCCTCGAGCGTATGGGGCTTTGTCACCCGCTCCGTAGGTCCAGCCAGCGCCTGTCGAACCCCCCATCATCCTTCTTAGGTTGACCTCGGATCAGGTAGGGATACCCGCTGAACTTAA	EF694625	SH231345.06FU		Saprotroph		Fungi	Ascomycota	Eurotiomycetes	Eurotiales	Trichocomaceae		EU142893	Penicillium_sp_E75_3_11
GL37158	ID1YYUI01A4PJ4	CTAGACTCGTCATCGATGAAGAACGTAGCGAAATGCGATAAGTAATGTGAATTGCAGAATTCCGTGAATCATCGAATCTTTGAACGCACATTGCGCCCTCTGGTATTCCGGAGGGCATGCCTGTCCGAGCGTCATTGCTGTTCCTCAAGCCCGGCTTGTGTGTTGGGCCTGCCGTCCTATGGACGGTGACCCGAAAAGCAGTGGCGGCGTCGCGTCCGGTCCTTAAGCGTTATGGGGCTTTGTCACCCGCTTTGGATGGCCGGCCGACTCCGTAGCCCATCGTGGTTTACCACATTCTTTGATGGACCTCGGATCAGGTAGGGATACCCGCTGAACTTAA	UDB004171	SH241667.06FU				Fungi	Ascomycota	Eurotiomycetes	Eurotiales			GU174354	uncultured_fungus
GL49724	ID1YYUI01EE4UN	AGACTCGTCAACGATGAAGAACGCAGCGAAACGCGATAAGTAATGTGAATTGCAGAATTCAGTGAATCATCGAATCTTTGAACGCACATTGCGCCCCCTGGCATTCCGGGGGGCATGCCCGTTCGAGCGTCATTAACACCCCTCAAGCCTGGCTTGGTATTGGGCGCCGGGACTCTCCCGCGCCCCGATGTCGCCGGCTGGACGACTCCGATCTCACAAGCGTTGTACAAATTCGCTGGCGGGACGGGCGGCCACGCCGTTAACCTCAATCAAATCGTTGACCTCGGATCGGGTAGGATACCCGCTGAACTTAA	AM999562	SH215034.06FU				Fungi	Ascomycota	Group0017				AM999703	uncultured_fungus
GL36793	ID1YYUI01BKIKV	TAGATCGTCATCGATGAAGAACGCTGCGAAATGCGATAAGTAGTGTGAATTGCAGAATTCAGTGAATCATCGAATCTTTGAACGCACATTGCGCCCCTCGGTATCCCGGGGGGCATGCCTGTTCGAGCGTCATTTCTAACACTCAAGTTCTACTTGGTATTGGGCACTGTTATTTCCGTCTTTTAGATGGTAAACACGCCTTAAATTTAGCCGGCAACAAGCACCAGTTCCGAGCGTAGCAGTAAAAACTTTCGCTTTTGGGAGCTTTGGGGCATTGTTCACCGTATAGTTTTTCTATAGTTTGACCTCGGATCAGGTAGGGATACCCGCTGAACTTAA	DQ979569	SH227670.06FU				Fungi	Ascomycota	Group0575				FR773250	uncultured_Ascomycota
GL41565	ID1YYUI01BQQ5L	CTAGACTCGTCACCGATGAAGAACGCAGCGAAATGCGATAAGTAGTGTGAATTGCAGAATTCAGTGAATCATCGAATCTTTGAACGCACATTGCGCCCCTCGGTATTCCGTGGGGCATGCCTGTTCGAGCGTCATTTACACCCTCAAGCTCTGCTTGGTGTTGGGCGTCTGTCCCGCGTTCGCGCGTGGACTCGCCTCAAAGTCATTGGCAGCGGTCTTTGCCAGCTTCTTGCGCAGCACAATTGCGCTCACAGGGGCTCTGGCGGATCGGCGTCCATTAAGTTACTCTATGACTTGACCTCGGATCAGGTAGGGATACCCGCTGAACTTAA	HE584927	SH232017.06FU				Fungi	Ascomycota	Group0575				GU053875	uncultured_fungus
GL46162	ID1YYUI02H8JY3	CTAGACTCGTCACGATGAAGAACGCTGCGAAATGCGATAAGTAATGTGAATTGCAGAATTCAGTGAATCATCGAATCTTTGAACGCACATTGCGCCCCTTGGTATTCCGAGGGGCATGCCTATTCGAGCGTCATTATCACCCCTCAAGCTCCGGCTTGGTGTTGAGGCCTGCTGTAAAGGCACCCTCTAAAATCAGTGGCAGTGCTGTCAGGCTCTAAGCGTAGTAATTTCTCTCGCTATAGGGTCCTGGTGGACACTCGTCAGAACCCCCCCATTTTTTAATGATTGACCTCGGATTAGGTAGGGATACCCGCTGAACTTAA	FJ552875	SH216433.06FU				Fungi	Ascomycota	Group0575				FJ554342	uncultured_Ascomycota
GL33900	ID1YYUI01CCH8G	CTAGACTCGTCATCGATGAAGAACGCTGCGAAACGCGATAGGTAATGTGAATTGCAGAATTCAGTGAATCATCGAATCTTTGAACGCACATTGCGCCCCCTGGTATTCCGGCGGGCATGTCTGTTTGAGCGTCAGTACGCACCTCTGTTTCAGCTTTGCTGAGCAGGTCGTGGGCGCACCTTTCGAAAGACGGGTGCCCCTAACGTAGCACGCTTGCGGGCTCCCACACAGATGTCAACGTAGTAAACTAAACGCTCGATGAAATCTTGTGGAGGCTTTGCCTGAACAAACCTTTTTGAGTTTGACCTCAGATCAGATAAGGATACCCGCTGAACTTAA	AM999664	SH196544.06FU				Fungi	Ascomycota	Lecanoromycetes				AM901896	uncultured_Ascomycota
GL45929	ID1YYUI01CRTAX	CATATTGCGCCCTTTGGCATTCCGAAGGGCATACCTGTTCGAGCGTCATTACAACCCTCAAGTCTAGTTACTTGTAGTTGGGCACTGCCATCAGGCATGCCTAAAAATCAGCGACGGTGGCAGTCAACCTCAAGCGTACAGGCGTAAGCATTCGCTATGTTGGAAGATTGATGCCTGTCAACCCCCCAAAATTCTAAGCATTGACCTCGGATCAGGTAGGAATACCCGCTGAACTTAA	JN053083	SH198032.06FU				Fungi	Ascomycota	Lecanoromycetes				EF373586	ascomycete_sp_CH_TcG
GL49821	IJOVCJS01ECUQK	CTAGACTCGTCATCGATGAAGAACGCTGCGAAATGCGATAAGTAATGTGAATTGCAGAATTCAGTGAATCATCGAATCTTTGAACGCATATTGCGCCCTTTGGTATTCCGAAGGGCATGCCTGTTCGAGCGTCATTACACCCTTCAAACTTCACTGTTTGTTGTTGGGTACTGCCTGTGGGCATACCTAAAAGCTAGCGACGGTTCAAGCCAACCTCAGACGTACAAGTATCGTTATAGGGGACGGTTGGGGCCTGTCTTTAACTAAACTATCTAAATGTTGACCTCGGATCAGGTAGGAATACCCGCTGAACTTAA	EF373561	SH198033.06FU				Fungi	Ascomycota	Lecanoromycetes				EF373561	ascomycete_sp_CH_Aa18
GL50026	ID03IXK02F5VOX	CTAGACTCGTCAACGATGAAGAACGCAGCGAAATGCGATAAGTAATGTGAATTGCAGAATTCAGTGAATCATCGAATCTTTGAACGCATATTGCGCCCTTTGGTATTCCGAAGGGCATGCCTGTTCGAGCGTCATTACACCCCTCAAACTTCATTGTTTGGTGTTGGGCAGTGCCAGTAGGCATGCCTAAAAATCAGCGACGGTCTCAACCAACCTCAGACGTACAAATATCGTTATAGGGCGCGGTTGGGGCTTGTCTTCAACTAAACTTTTAAATGTTGACCTCGGATCAGGTAGGAATACCCGCTGAACTTAA	JN053083	SH198032.06FU				Fungi	Ascomycota	Lecanoromycetes				EF373586	ascomycete_sp_CH_TcG
GL46835	ID03IXK02G4N04	TGAACGCACATTGCGCCCCTTGGTATTCCGGGGGGCATGCCTGTTCGAGCGTCATTACAACCCTCAAGCTCTGCTTGGTATTGGGCGTCACCGGTTCCGGTGTGCTCTAAAATCAGTGGCGGCGCCGTCTGGCTCTAAGCGTAGTACATACTCTCGCTATAGATGTCAGTTGGATGCTTGCCAGCAACCCCCAATTTTTTTAAGGTTGACCTCGGATCAGGTAGGGATACCCGCTGAACTTAA	HQ713758	SH209175.06FU		Saprotroph		Fungi	Ascomycota	Leotiomycetes	Helotiales	Dermateaceae	Cryptosporiopsis	JN225939	Pezicula_sp_3_ICMP_18931
GL47050	IJOVCJS01BBCV7	CTAGACTCGTCAACGATGAAGAACGCAGCGAAATGCGATAAGTAATGTGAATTGCAGAATTCAGTGAATCATCGAATCTTTGAACGCACATTGCGCCCTTTGGTATTCCAGAGGGCATGCCTGTTCGAGCGTCATTACAACCCTCAAGCTCTGCTTGGTATTGGGCGTCACCGGCAACGGTGTGCCTTAAAATCAGTGGCGGCGCCATCTGGCTCTAAGCGTAGTAATTCTTCTCGCTATAGACGTCCGGTGGAAGCTTGCCAGCAACCCCAAATTTTTTAAGGTTGACCTCGGATCAGGTAGGGATACCCGCTGAACTTAA	HQ713758	SH209175.06FU		Saprotroph		Fungi	Ascomycota	Leotiomycetes	Helotiales	Dermateaceae	Cryptosporiopsis	DQ914738	Aphyllophorales_sp_EXP0530F
GL48211	ID03IXK02G6HFW	ACATTGCGCCCCTTGGTATTCCGAGGGGCATGCCTGTTCGAGCGTCATTACAACCCTCAAGCTCTGCTTGGTATTGGGCATCACCAGAGATGGTGTGCCTTAAAATCAGTGGCGGTGCCATGTGGCTCTAAGCGTAGTAATTTTCTCGCTATAGACGTCCTGTGGATGCTTGCCAGCAACCCCTAATTTTTTAAGGTTGACCTCGGATCAGGTAGGGATACCCGCTGAACTTAA	GU174278	SH209344.06FU		Saprotroph		Fungi	Ascomycota	Leotiomycetes	Helotiales	Dermateaceae	Cryptosporiopsis	DQ914738	Aphyllophorales_sp_EXP0530F
GL28160	ID1YYUI01B1A53	CTAGACTCGTCATCGATGAAGAACGCTGCGAAATGCGATAAGTAATGTGAATTGCAGAATTCAGTGAATCATCGAATCTTTGAACGCACATTGCGCCCCTTGGTATTCCGAGGGGCATGCCTGTTCGAGCGTCATTACAACCCTCAAGCTCTGCTTGGTATTGGGCATCACCCGCAAGGGCGTGCCTTAAAATCAGTGGCGGTGCCATCTGGCTCTAAGCGTAGTAATACTCCTCGCTATAGTGTCTGGTGGTTACTTGCCAACAACCCCAAATTTTCTATGGTTGACCTCGGATCAGGTAGGGATACCCGCTGAACTTAA	GU174278	SH209344.06FU				Fungi	Ascomycota	Leotiomycetes	Helotiales	Dermateaceae		GU174311	uncultured_fungus
GL41375	IJOVCJS01EBOAO	CTAGACTCGTCACCGATGAAGAACGCAGCGAAATGCGATAAGTAATGTGAATTGCAGAATTCAGTGAATCATCGAATCTTTGAACGCACATTGCGCCCCTTGGTATTCCGAGGGGCATGCCTGTTCGAGCGTCATTATCAACCATCAAGCTCTGCTTGGCATTGGGTGCCGCCCCTCACGGGACGCTCCTTAAACTTGTAGGCGGTGACCCCGAGTCTCAAGCGTAGTAAATCTTTAGCTTAGAGGCCTCGGTGGCCGCTCGCCCCTAGAACCCATCACCTAAAGGTTGACCTCGGATCAGGTAGGGATACCCGCTGAACTTAA	HQ166340	SH209176.06FU				Fungi	Ascomycota	Leotiomycetes	Helotiales	Dermateaceae		AM901772	uncultured_Ascomycota
GL44922	ID1YYUI02IBYE4	CTAGACTCGTCATCGATGAAGAACGTGGCGAAATGCGATAAGTAATGTGAATTGCAGAATTCAGTGAACCATCGAATCTTTGAACGCACATTGCGCCCCTTGGTATTCCGAGGGGCATGCCTGTTCGAGCGTCATTTCAACCCTCAAGCGCAGCTTGGTCTTGGGCTCCGCCGCTCACCCGGCGGGTCCTAAAAGCAGTGGCGGTGCCGTCGGGCCCTGAGCGTAGTAACCTCCTCGCTACAGGGCCCCGGCGGGCGCCGGCCAGCAACCCCCCATCTTCCACGGTTGACCTCGGATCAGGTAGGGATACCCGCTGAACTTAA	FJ475646	SH215688.06FU				Fungi	Ascomycota	Leotiomycetes	Helotiales	Dermateaceae		FJ475823	uncultured_fungus
GL46675	IGJRWKL02HDS67	CTAGACTCGTCATCGATGAAGAACGCTGCGAAATGCGATAAGTAATATGAATTGCAGAATTCAGTGAATCATCGAATCTTTGAACGCACATTGCGCCCTCTGGTATTCCGGAGGGCATGCCTGTTCGAGCGTCATTACAACCCTCAAGCTCTGCTTGGTATTGGGCCTCACCGGCAACGGTGTGCCCTAAAATCAGTGGCGGTGCCGTCTGGCTCTAAGCGTAGTAAATCTCTCGCTCTAGGTGCCCGGTGGACGCTTGCCAGCAACCCCCAATTTTTTACAGGTTGACCTCGGATCAGGTAGGGATACCCGCTGAACTTAA	AM999554	SH209267.06FU				Fungi	Ascomycota	Leotiomycetes	Helotiales	Dermateaceae		JF449728	uncultured_Helotiales
GL47391	ID03IXK02GD810	CTAGACTCGTCACCGATGAAGAACGCAGCGAAATGCGATAAGTAATGTGAATTGCAGAATTCAGTGAATCATCGAATCTTTGAACGCACATTGCGCCCTTTGGTATTCCGAAGGGCATGCCTGTTCGAGCGTCATTACAACCCTCAAGCTCTGCTTGGTATTGGGCCTCGCCAGCAATGGCGTGCCTTAAAATCAGTGGCGGTGCCGTCTGGCTCTAAGCGTAGTAATTTCTCTCGCTCTGGATGTCATATGGATACTTGCCATCAACCCCCAATTTTTAAAGGTTGACCTCGGATCAGGTAGGGATACCCGCTGAACTTAA	HQ166340	SH209176.06FU				Fungi	Ascomycota	Leotiomycetes	Helotiales	Dermateaceae		HQ433015	uncultured_Ascomycota
GL34780	IGJRWKL02HWEX5	CTAGACTCGTCAACGATGAAGAACGCAGCGAAATGCGATAAGTAATGTGAATTGCAGAATTCAGTGAATCATCGAATCTTTGAACGCACATTGCGCCCCGTGGTATTCCGCGGGGCGATGCCTGTTCGAGCGTCAGTACAACACTCAAGCTCTGCTTGGTATTGGGCCCTGCCGGCAACGGCAGGCCTTAAAATCAGTGGCGGCGCCATCTGGCTCTAAGCGTAGTAATACTCCTCGCTACAGAGTCCCGGTGGATGCTTGCCAGCAACCCCCAACTTTCTAAGTTTGACCTCGGATCAGGTAGGGATACCCGCTGAACTTAA	HM589268	SH209201.06FU		Saprotroph		Fungi	Ascomycota	Leotiomycetes	Helotiales	Heliotiaceae	Helicodendron	EF029229	Helicodendron_websteri
GL44602	IGJRWKL02HVPVF	ATTGCGCCCCTTGGTATTCCGGGGGGCATGCCTGTTCGAGCGTCATTATCACCCCTCAAGCTCAGCTTGGTGTTGGGGCCGGCCCGTCACAGGGCCGCCCTTAAAAGCAGTGGCGGTGCCATCTGGCTCTACGCGTAGTAATACTCCTCGCGACAGAGTCCCGGTGGTGTCCTGCCAGAACCCCCCATCTTTTTAATGATTGACCTCGGATCAGGTAGGGATACCCGCTGAACTTAA	GU722053	SH191098.06FU		Saprotroph		Fungi	Ascomycota	Leotiomycetes	Helotiales	Helotiaceae	Articulospora	GU722054	uncultured_fungus
GL44095	ID1YYUI02HQ1GA	CTAGACTCGTCATCGATGAAGAACGCAGCGAAATGCGATAAGTAATGTGAATTGCAGAATTCAGTGAATCATCGAATCTTTGAACGCACATTGCGCCCTCTGGTATTCCGGGGGGCGATGCCTGTTCGAGCGTCATTACAACCACTCAAGCTCACGCTTGGTCTTGGGGTTCGCGATTCCGCGGCCTCTAAAATCAGTGGCGGTGCCTGTCGGCTCTACGCGTAGTAATACTCCTCGCGTTTGAGTCCGGTAGGTTTACTTGCCAGCAACCCCCAATTTTTACAGGTTGACCTCGGATCAGGTAGGGATACCCGCTGAACTTAA	JF449498	SH240807.06FU		Saprotroph		Fungi	Ascomycota	Leotiomycetes	Helotiales	Helotiaceae	Cadophora	JF449547	uncultured_Helotiales
GL45809	ID1YYUI01BIH2W	CTAGACTCGTCACCGATGAAGAACGCAGCGAAATGCGATAAGTAATGTGAATTGCAGAATTCAGTGAATCATCGAATCTTTGAACGCACATTGCGCCCTCTGGTATTCCGGGGGGCATGCCTGTTCGAGCGTCATTACAACCCTCAAGCTCTGCTTGGTATTGGACCTTCGCCTTCCCGGCGGGTCTCAAAATCAGTGGCGGTGTCATCTGACTCTAAGCGTAGTAAATTCTCTCGCTCTGGAGCTTCGGTTGATTACTTGCCATCGAACCCCAAATTTTTAAAGGTTGACCTCGGATCAGGTAGGGATACCCGCTGAACTTAA	JN889719	SH222307.06FU		Saprotroph		Fungi	Ascomycota	Leotiomycetes	Helotiales	Helotiaceae	Cadophora	GU727556	Mollisia_incrustata
GL45958	ID03IXK02IQQB9	CTAGACTCGTCAACGATGAAGAACGCAGCGAAATGCGATAAGTAATGTGAATTGCAGAATTCAGTGAATCATCGAATCTTTGAACGCACATTGCGCCCTCTGGTATTCCGGGGGGCATGCCTGTTCGAGCGTCATTATAACCACTCAAGCTCTCGCTTGGTATTGGGGTTCGCGGTCTCGCGGCCCCTAAAATCAGTGGCGGTGCCTGTCGGCTCTACGCGTAGTAATACTCCTCGCGTCTGGGTCCGGTAGGTCTACTTGCCAGCAACCCCCAATTTTTTACAGGTTGACCTCGGATCAGGTAGGGATACCCGCTGAACTTAA	DQ317328	SH204718.06FU		Saprotroph		Fungi	Ascomycota	Leotiomycetes	Helotiales	Helotiaceae	Cadophora	JX077038	Cadophora_malorum
GL46228	IJOVCJS01CWJ7E	CCCCTTGGTATTCCGAGGGGCATGCCTGTTCGAGTGTCATTACAACCCTCAAGCATAGCTTGGTCTTGGGCTCCGCTGCTTACCCAGCGGGCCATAAAAGCAGTGGCGGTGCCACGAGGCCCTGAGCGTAGTAAATATCCTCGCTATAGGTGTCTCGCGGTAGCTTGCCAGCAACCCCCAACTTTCTAAGTTTGACCTCGGATCAGGTAGGGATACCCGCTGAACTTAA	AM999683	SH215682.06FU		Saprotroph		Fungi	Ascomycota	Leotiomycetes	Helotiales	Helotiaceae	Cistella	GU727553	Cistella_spicicola
GL48149	ID03IXK02HLTVJ	CTAGGACTCGTCATCGATGAAGAACGCAGCGAAATGCGATAAGTAATGTGAATTGCAGAATTCAGTGAATCATCGAATCTTTGAACGCACATTGCGCCCCGTGGTATTCCGCGGGGCATGCCTGTTCGAGCGTCAGTACAACACTCAAGCTCTGCTTGGTATTGGATCACACCGGCAACGGTCGATCTTAAAATCAGTGGCGGTGCCCTCTGGCTCTAAGCGTAGTAATTTCTCTCGCTACAGTGTCCAGGCGGTGTCCTGCCAGCAACCCCCAATTTTCTAGTTTGACCTCGGATCGGGTAGGGATACCCGCTGAACTTAA	AM084477	SH209204.06FU		Saprotroph		Fungi	Ascomycota	Leotiomycetes	Helotiales	Helotiaceae	Cistella	JN889724	uncultured_fungus
GL47560	ID03IXK02GARMK	CTAGACTCGTCATCGATGAAGAACGCTGCGAAATGCGATAAGTAATGTGAATTGCAGAATTCAGTGAATCATCGAATCTTTGAACGCACATTGCGCCCCGTGGTATTCCGCGGGGCATGCCTGTTCGAGCGTCATTTAAACCAATCCAGCTTGCTGGGTCTTGGGTCTCGCCTCTGGGCGGGCCTTAAAATCAGTGGCGGCACCACCCGGCTTTAAGCGTAGTAATTCTTCTCGCTATAGAGTCCCGGGCGGAGGCTTGCCAGCTAACCCCCAATTCTTAAAGGTTGACCTCGGATCAGGTAGGGATACCCGCTGAACTTAA	FJ005106	SH203844.06FU		Saprotroph		Fungi	Ascomycota	Leotiomycetes	Helotiales	Helotiaceae	Crocicreas	JF300400	uncultured_fungus
GL40869	IGJRWKL02JNTLV	CTAGACTCGTCATCGATGAAGAACGCAGCGAAATGCGATAAGTAATGTGAATTGCAGAATTCAGTGAATCATCGAATCTTTGAACGCACATTGCGCCCCTTGGTATTCCGAGGGGCATGCCTGTTCGAGCGTCATTATAACCAATCACGCCCTGTGCGTGGTCTTGGGGCTCGCGGTTTCCGCGTCCCTTAAAACCAGTGGCGGTGCTGTTGGGCTCTAAGCGTAGTAATTCTTCTCGCTATAGGGTCCCAGTGGTCTACTTGCCATAACCCCAATTTTTTAAGGTTGACCTCGGATCAGGTAGGGATACCCGCTGAACTTAA	DQ320128	SH207165.06FU		Saprotroph		Fungi	Ascomycota	Leotiomycetes	Helotiales	Helotiaceae	Meliniomyces	HM044632	uncultured_fungus
GL46246	IJOVCJS01AIHOF	CGCCCCTTGGTATTCCGAGGGGCATGCCTGTTCGAGCGTCATTATAACCACTCAAGCCTGGCTTGGTATTGGGGTTTTCGCGTGTTCGTGGCCCTTAAAATCAGTGGCGGTGCCGTCTGGCTCTAAGCGTAGTAATTTCTCTCGCTATAGGGTTCCGGTGGTTACTTGCCAAAACCCCCCATTTTTTTCTAGGTTGACCTCGGATCAGGTAGGGATACCCGCTGAACTTAA	AY762619	SH207164.06FU		Saprotroph		Fungi	Ascomycota	Leotiomycetes	Helotiales	Helotiaceae	Meliniomyces	HQ157931	Meliniomyces_variabilis|Meliniomyces_variabilis|
GL47232	IGJRWKL02HMI3E	GCACATTGCGCCCCTTGGTATTCCGAGGGGCATGCCTGTTCGAGCGTCATTATAACCACTCAAGCCTCGGCTTGGTATTGGGGTTCGAGGTTTCTCGGCCCTTAAAATCAGTGGCGGTGCCATCTGGCTCTAAGCGTAGTAATTTTTCTCGCTACAGGGTCCGGGTGGTTACTTGCCAAAAACCCCCCATTTTTTAAGGTTGACCTCGGATCAGGTAGGGATACCCGCTGAACTTAA	FM172867	SH207210.06FU		Saprotroph		Fungi	Ascomycota	Leotiomycetes	Helotiales	Helotiaceae	Meliniomyces	AB476490	uncultured_fungus
GL03196	ID1YYUI01EIO5K	CTAGACTCGTCACCGATGAAGAACGCAGCGAAATGCGATAAGTAATGTGAATTGCAGAATTCAGTGAATCATCGAATCTTTGAACGCACATTGCGCCCCTTGGTATTCCGAGGGGCATGCCTGTTCGAGCGTCATTATAACCACTCAAGCTCACGCTTGGTATTGGGGTTCGCGTGCTCGCGGCCCTTAAAATCAGTGGCGGTGCCGTCTGGCTCTACGCGTAGTAATTTCTCTCGCGATGGAGTTCCGGCGGTTGCTTGCCAAAACCCCCCTATTTTCTCAGGTTGACCTCGGATCAGGTAGGGATACCCGCTGAACTTAA	FM172861	SH207178.06FU		Saprotroph		Fungi	Ascomycota	Leotiomycetes	Helotiales	Helotiaceae	Meliniomyces	FN679038	uncultured_Meliniomyces|Helotiales|
GL39339	IGJRWKL02FJH4G	CTAGACTCGTCATCGATGAAGAACGTGGCGAAATGCGATAAGTAATGTGAATTGCAGAATTCAGTGAATCATCGAATCTTTGAACGCACATTGCGCCCCTTGGTATTCCGAGGGGCATGCCTGTTCGAGCGTCATTATAACCACTCAAGCCTCGGCTTGGTCTTGGGGTCCCGCGGTCTCGCGGCCCTTAAAATCAGTGGCGGTGCCGTCTGGCTCTAAGCGTAGTAATTCTCTCGCTATAGGGTCCAGGTGGTGGCTTGCCAAAACCCCCCATTTTTCTATGGTTGACCTCGGATCAGGTAGGGATACCCGCTGAACTTAA	DQ914727	SH207212.06FU		Saprotroph		Fungi	Ascomycota	Leotiomycetes	Helotiales	Helotiaceae	Meliniomyces	GQ996162	fungal_sp_mh34632|Helotiales|
GL40260	ID1YYUI01B5IDL	GCGCCCCTTGGTATTCCGAGGGGCATGCCTGTTCGAGCGTCATTATAACCACTCAAGCCTCGGCTTGGTATTGGGGTTCGAGGTTTCTCGGCCCTTAAAATCAGTGGCGGTGCCATCTGGCTCTAAGCGTAGTAATTTTTCTCGCTACAGGGTCCGGGTGGTTACTTGCCAAAAACCCCCCATTTTTAAGGTTGACCTCGGATCAGGTAGGGATACCCGCTGAACTTAA	FM172867	SH207210.06FU		Saprotroph		Fungi	Ascomycota	Leotiomycetes	Helotiales	Helotiaceae	Meliniomyces	AB476490	uncultured_fungus
GL44987	ID1YYUI01D5YEN	CTAGACTCGTCATCGATGAAGAACGTGGCGAAATGCGATAAGTAATGTGAATTGCAGAATTCAGTGAATCATCGAATCTTTGAACGCACATTGCGCCCCTTGGTATTCCGAGGGGCATGCCTGTTCGAGCGTCATTATAACCACTCAAGCCTGGCTTGGTATTGGGGCTTTCGCGTGTTCGCGGCCCTTAAAATCAGTGGCGGTGCCGTCTGGCTCTAAGCGTAGTAATTTCTCTCGCTATAGGGTTCCGGTGGTTACTTGCCAAAACCCCCCATTTTTTCTAGGTTGACCTCGGATCAGGTAGGGATACCCGCTGAACTTAA	AY762619	SH207164.06FU		Saprotroph		Fungi	Ascomycota	Leotiomycetes	Helotiales	Helotiaceae	Meliniomyces	JQ272408	Meliniomyces_variabilis
GL46452	IGJRWKL02IBZHA	CTAGACTCGTCATCGATGAAGAACGCAGCGAAATGCGATAAGTAATGTGAATTGCAGAATTCAGTGAATCATCGAATCTTTGAACGCACATTGCGCCCCTTGGTATTCCGAGGGGCATGCCTGTTCGAGCGTCATTATAACCAATCGCGCCCTGTGCGTGGTCTTGGGGCTCGCGGTTTCCGCGTCCCTTAAAACCAGTGGCGGTGCCGTTGGGCTCTAAGCGTAGTAATTCTTCTCGCTATAGGGTCCCAGTGGTCTACTTGCCATAACCCCAATTTTTCAAGGTTGACCTCGGATCAGGTAGGGATACCCGCTGAACTTAA	DQ320128	SH207165.06FU		Saprotroph		Fungi	Ascomycota	Leotiomycetes	Helotiales	Helotiaceae	Meliniomyces	HM044632	uncultured_fungus
GL47402	IJOVCJS01CPENK	CTAGACTCGTCATCGATGAAGAACGCAGCGAAATGCGATAAGTAATGTGAATTGCAGAATTCAGTGAATCATCGAATCTTTGAACGCACATTGCGCCCCTTGGTATTCCGAGGGGCATGCCTGTTCGAGCGTCATTATAACCACTCAAGCTTCGGCTTGGTCTTGGGGTTTCGAGGTTTCTCGGCCCTTAAAATCAGTGGCGGTGCCATCTGGCTCTAAGCGTAGTAATTCTTCTCGCTACAGGGTCCAGGTGGTTACCTGCCAATAAACCCCCCCTTTTAAGGTTGACCTCGGATCAGGTAGGGATACCCGCTGAACTTAA	GU174310	SH207183.06FU		Saprotroph		Fungi	Ascomycota	Leotiomycetes	Helotiales	Helotiaceae	Meliniomyces	FJ554107	uncultured_Helotiaceae
GL48606	ID1YYUI01BOXS4	CTAGACTCGTCACCGATGAAGAACGCAGCGAAATGCGATAAGTAATGTGAATTGCAGAATTCAGTGAATCATCGAATCTTTGAACGCACATTGCGCCCCTTGGTATTCTGAGGGGCATGCCTGTTCGAGCGTCATTATAATCACTCAAGCCTGGCTTGGTATTGGGGCTCGCGGTTCCGCGGCCCTTAAAATCAGTGGCGGTGCCGTCTGGCTCTAAGCGTAGTAATTCTCTCGCTATAGGGTCCTGGCGGTAGCTTGCCAAAATCCCCCTATTTTTTACGGTTGACCTCGGATCAGGTAGGGATACCCGCTGAACTTAA	EU292530	SH207222.06FU		Saprotroph		Fungi	Ascomycota	Leotiomycetes	Helotiales	Helotiaceae	Meliniomyces	EU292530	uncultured_fungus|Meliniomyces_vraolstadiae|
GL47933	ID1YYUI01AOMNH	CTAGACTCGTCATCGATGAAGAACGTGGCGAAATGCGATAAGTAATGTGAATTGCAGAATTCAGTGAATCATCGAATCTTTGAACGCACATTGCGCCCGCTGGTATTCCGGCGGGCATGCCTGTTCGAGCGTCATTATGACCAATCAAGCTCTGCTTGGCCTTGGGGCCCGCTGTACCGGCGGCCCTTAAAATCAGTGGCGGTGCCGTCTGGCTCTAAGCGTAGTAATACTTCTCGCTACAGGGTCCAGTCGTCCACCCGCCAGAACACCCAACTTTCTTAGGTTGACCTCGGATCAGGTAGGGATACCCGCTGAACTTAA	KF156275	SH228608.06FU		Saprotroph		Fungi	Ascomycota	Leotiomycetes	Helotiales	Helotiaceae	Rhizoscyphus	JQ272354	Magnaporthaceae_sp_1_RB_2011
GL42692	IGJRWKL02FRHN2	CTAGACTCGTCATCGATGAAGAACGCTGCGAAATGCGATAAGTAATGTGAATTGCAGAATTCAGTGAATCATCGAATCTTTGAACGCACATTGCGCCCCGTGGTATTCCGCGGGGCATGCCTGTTCGAGCGTCATTTCAACCCATCAAGCTTCGGCTTGGTCTTGGGGCCTGCGGTTTCGCAGCCTCTAAACCCAGTGGCGGTGCTATTGAGCTCTGAGCGTAGTAATTTCTCTCGCTATAGAGTCTCGGTGGTGACTTGCCAACAACCCCCAATTTTTATCAGGTTGACCTCGGATCAGGTAGGGATACCCGCTGAACTTAA	FM200472	SH234734.06FU		Saprotroph		Fungi	Ascomycota	Leotiomycetes	Helotiales	Helotiaceae	Varicosporium	JN655610	Varicosporium_elodeae
GL41751	ID1YYUI01BXHV2	CTAGACTCGTCATCGATGAAGAACGCTGCGAAATGCGATAAGTAATGTGAATTGCAGAATTCAGTGAATCATCGAATCTTTGAACGCACATTGCGCCCCTTGGTATTCCGAGGGGCATGCCTGTTCGAGCGTCATTATGACCACTCAAGCCCGGCTTGGTGTTGGGGTCCGCGGTCTCGCGGCCCTTAAAATCAGTGGCGGCGCCATCTGGCTCTAAGCGTAGTAATACTCCTCGCTATAGGGTTCCCGGTGGATGCTTGCCATCAACCCCCAATCTCACGGTTGACCTCGGATCAGGTAGGGATACCCGCTGAACTTAA	FJ475546	SH195739.06FU		Saprotroph		Fungi	Ascomycota	Leotiomycetes	Helotiales	Helotiaceae		HQ625479	uncultured_fungus
GL48098	ID03IXK02I8TKD	CTAGACTCGTCATCGATGAAGAACGCTGCGAAATGCGATAAGTAATGTGAATTGCAGAATTCAGTGAATCATCGAATCTTTGAACGCACATTGCGCCCCTTGGTATTCCGAGGGGCATGCCTGTTCGAGCGTCATTATGGACCACTCAAGCCCGGCTTGGTGTTGGGGTCCGCGGTCCCGCGGCCCTTAAAATCAGTGGCGGCGCCATCTGGCTCTAAGCGTAGTAATACTCCTCGCTATAGGGTTCCCGGTGGATGCTTGCCATCAACCCCCAATCTCACGGTTGACCTCGGATCAGGTAGGGATACCCGCTGAACTTAA	FJ475546	SH195739.06FU		Saprotroph		Fungi	Ascomycota	Leotiomycetes	Helotiales	Helotiaceae		JF300389	uncultured_fungus
GL45898	ID03IXK02GY5E6	CCTATCCCCTGTGTGCCTTGAACGCCGACCACACCACTCGTCTAGACTCGTCATCGATGAAGAACGCTGCGAAATGCGATAAGTAATGTGAATTGCAGAATTCAGTGAATCATCGAATCTTTGAACGCACATTGCGCCCCGTGGTATTCCNCGGGGCATGCCTGTTCGAGCGTCAGTACAACACTCAAGCTCTGCTTGGTCTTGGGCCGCGTCCGTCTGGACCGGCCTTAAAATCAGTGGCGGTGCCATCGTGCTCTAAGCGTAGTAATACTCCTCGCTACAGGGTCTCGGTGCGTGCTGGCCAGCAACCCCCAACTTTCTAAGTTTGACCTCGGATCAGGTAGGGATACCCGCTGAACTTAA	DQ093756	SH209287.06FU		Saprotroph		Fungi	Ascomycota	Leotiomycetes	Helotiales	Hyaloscyphaceae	Chalara	HM036588	Chalara_microchona
GL38158	IGJRWKL02JOYWT	CTAGACTCGTCATCGATGAAGAACGCTGCGAAATGCGATAAGTAATGCGAATTGCAGAATTCAGTGAGTCATCGAATCTTTGAACGCACATTGCGCCCTGTGGTACTCCGCAGGGCATGCCTGTTCGAGCGTCAGTGCAACACTCAAGCTCAGCTTGGTCTTGAGCCCAGCCGGTAAAATGGCAGGCTTTAAAATTAGTGGCGGCGCCATTAGGCTCTAAGCGTAGTAATTATCCTCGCTATTGAGTTCTGGTGGTAGCTTGCCAGCAACCCCAACTTTCTAAGTTTGACCTCGGATCAGGTAGGGATACCCGCTGAACTTAA	DQ914698	SH208261.06FU		Saprotroph		Fungi	Ascomycota	Leotiomycetes	Helotiales	Hyaloscyphaceae	Chalara	FR667221	Chalara_hyalocuspica|Chalara_hyalocuspica|
GL41194	IGJRWKL02GW2WQ	CTAGACTCGTCACCGATGAAGAACGCAGCGAAATGCGATAAGTAATGTGAATTGCAGAATTCAGTGAATCATCGAATCTTTGAACGCACATTGCGCCCTGTGGTATTCCGCAGGGCATGCCTGTTCGAGCGTCAGTACAACACTCAAGCTCAGCTTGGTCTTGAGCCCAGCCGGTTACGGCGGGCTTTAAAATCAGTGGCGGCGCCATCTGGCTCTAAGCGTAGTAATACTCCTCGCTATTGAGTCCTGGTGGATGCTTGCCAGCAACCCCCAACTTTCTAAGTTTGACCTCGGATCAGGTAGGGATACCCGCTGAACTTAA	FR667221	SH208257.06FU		Saprotroph		Fungi	Ascomycota	Leotiomycetes	Helotiales	Hyaloscyphaceae	Chalara	FR667221	Chalara_hyalocuspica|Chalara_hyalocuspica|
GL46209	ID1YYUI02I1UBJ	CTAGACTCGTCATCGATGAAGAACGCTGCGAAATGCGATAATTAATGTGAATTGCAGAATTTAGTGAATCATCGAATCTTTGAACGCACATTGCGCCCCTTGGTATTCCGGGGGGCATGCCTGTTCGAGCGTCATTTCAACCCTCAAGCTCTGCTTGGTCTTGGGCCCCGCCGGCGACGGCAGGCCTCAAAAACAGTGGCGGCGCCGTCAGGTCCCTCAGCGTAGTAATTCTTCTCGCTGCTGGGCCCGGGTGGCCGCTGGCCAGGAACCCCAAACTTTCTATGGTTGACCTCGGATCAGGTAGGGATACCCGCTGAACTTAA	KC457014	SH208246.06FU		Saprotroph		Fungi	Ascomycota	Leotiomycetes	Helotiales	Hyaloscyphaceae	Chalara	HM439540	fungal_sp_867_YZ_2011
GL46494	IGJRWKL02JH9ZB	CTAGACTCGTCAACGATGAAGAACGCAGCGAAATGCGATAATTAATGTGAATTGCAGAATTTAGTGAATCATCGAATCTTTGAACGCACATTGCGCCCCTTGGTATTCCGGGGGGCATGCCTGTTCGAGCGTCATTTCAACCCTCAAGCACTGCTTGGTCTTGGGCCGCGCCGGCGACGGCGGGCCTCAAACGTAGTGGCGGCACCATCGGTTCCCTCAGTGTAGTAACATCTCTCGCTGCTGGGCTTCGGTGGCTGCTAGCCAGTAACCCCTAATTTTCTCTGGTTGACCTCGGATCAGGTAGGGATACCCGCTGAACTTAA	KC457103	SH208275.06FU		Saprotroph		Fungi	Ascomycota	Leotiomycetes	Helotiales	Hyaloscyphaceae	Chalara	JX043059	uncultured_ectomycorrhizal_fungus
GL46496	IGJRWKL02GNEUG	CTAGACTCGTCAACGATGAAGAACGCAGCGAAATGCGATAAGTAATGTGAATTGCAGAATTCAGTGAATCATCGAATCTTTGAACGCACATTGCGCCCCTTGGTATTCCGGGGGGCATGCCTGTTCGAGCGTCATTACAACCCTCAAGCTATGCTTGGTTATGGGCCGTGCCGGCAACGGCTGGCCCCAAAATTAGTGGCGGCGCCATCGTGCTCTCAGCGTAGTAATTCTTCTCGCTGTTGGGTCCCGGTGGACGCTGGCCAGCAACCCCCAATTTTTTATGGTTGACCTCGGATCAGGTAGGGATACCCGCTGAACTTAA	EF619696	SH209243.06FU		Saprotroph		Fungi	Ascomycota	Leotiomycetes	Helotiales	Hyaloscyphaceae	Chalara	FR667232	Chalara_sp_PRM915970
GL46623	ID1YYUI01AS21Q	CTAGACTCGTCACCGATGAAGAACGCAGCGAAATGCGATAAGTAATGTGAATTGCAGAATTCAGTGAATCATCGAATCTTTGAACGCACATTGCGCCCCGTGGTATTCCGCGGGGCATGCCTGTTCGAGCGTCAGTACAACACTCAAGCTCTGCTTGGTCTTGGGCCGCGTCCGTCTGGACCGGCCTTAAAATCAGTGGCGGTGCCACCGTGCTCTAAGCGTAGTAATACTCCTCGCTACAGGGTCTCGGTGCGTGCTGGCCAGCAACCCCCAACTTTCTAAGTTTGACCTCGGATCAGGTAGGGATACCCGCTGAACTTAA	DQ093756	SH209287.06FU		Saprotroph		Fungi	Ascomycota	Leotiomycetes	Helotiales	Hyaloscyphaceae	Chalara	HM036588	Chalara_microchona
GL47109	IGJRWKL02H9UOP	CTAGACTCGTCATCGATGAAGAACGCAGCGAAATGCGATAAGTAATGTGAATTGCAGAATTCAGTGAATCATCGAATCTTTGAACGCACATTGCGCCCCGTGGTATTCCGCGGGGCATGCCTGTTCGAGCGTCAGTACAACACTCAAGCTCTGCTTGGTATTGGGTCGCGTCAGCAATGACCGGCCTTAAAAACATTGGCGGTGCCATCGTGCTCTGAGCGTAGTAATACTCCTCGCTATAGAGTCTCGGTGCGTGCTTGCCACTAACCCCCAACCTTCTAAGTTTGACCTCGGATCAGGTAGGGATACCCGCTGAACTTAA	DQ093756	SH209287.06FU		Saprotroph		Fungi	Ascomycota	Leotiomycetes	Helotiales	Hyaloscyphaceae	Chalara	JQ666468	uncultured_soil_fungus
GL38675	IGJRWKL02G2HAJ	CTAGACTCGTCACCGATGAAGAACGCAGCGAAATGCGATAAGTAATGTGAATTGCAGAATTCAGTGAATCATCGAATCTTTGAACGCACATTGCGCCCTCTGGTATTCCGGAGGGCATGCCTGTTCGAGCGTCATAATGACCAACTCACCTTACGGTGGTCTTGGGGCTGGCCGTTTGGCCTCCCTTAAAATCAGTGGCGGTGCTGTCAAGCTCTAAGCGTAGTAACTTTTCTCGCTACAGGGTCTTGACGGTGTCTTGCCAACAACCCCAACTTTTCATAAGGTTGACCTCGGATCAGGTAGGGATACCCGCTGAACTTAA	KC514870	SH220877.06FU		Saprotroph		Fungi	Ascomycota	Leotiomycetes	Helotiales	Hyaloscyphaceae	Clathrosphaerina	EF029222	Clathrosphaerina_zalewskii
GL46329	ID1YYUI01DPYCI	CTAGACTCGTCATCGATGAAGAACGCAGCGAAATGCGATAAGTAATGTGAATTGCAGAATTCAGTGAATCATCGAATCTTTGAACGCACATTGCGCCCCTTGGTATTCCGGGGGGCATGCCTGTTCGAGCGTCATTACACCTCTCAAGCCTGGCTTGGTCTTGGGCTCCGCCGTTCGTTCGGCGGGCCTTAAAATCAGTGGCGGTGCCTCCGCGGCCCTGAGCGTAGTAAATTTCCTCGCTTTTGGACCCGGTGGTTACTGGCCAGCAACCCCCAACTTCTAAGTTTGACCTCGGATCAGGTAGGGATACCCGCTGAACTTAA	DQ069004	SH215667.06FU		Saprotroph		Fungi	Ascomycota	Leotiomycetes	Helotiales	Hyaloscyphaceae	Hyphodiscus	EU689192	uncultured_soil_fungus
GL47845	ID03IXK02F7HR3	CTAGACTCGTCACCGATGAAGAACGCAGCGAAATGCGATAAGTAATGTGAATTGCAGAATTCAGTGAATCATCGAATCTTTGAACGCACATTGCGCCCCTTGGTATTCCGGGGGGCATGCCTGTTCGAGCGTCATTATAACCAATCCAGCCTGGCTGGGTGTTGGGCCTCGCGGTACCGCGGGCCTTAAAGCTAGTGGCGGTGCTCTCATGCTCTACGCGTAGTAACTTTTCTCGCTATAGGGTCCTGGGAGATGCTTGCCAACAACCCCAAATTTTTTCAGGTTGACCTCGGATCAGGTAGGGATACCCGCTGAACTTAA	AB481260	SH189780.06FU		Saprotroph		Fungi	Ascomycota	Leotiomycetes	Helotiales	Hyaloscyphaceae	Lachnum	FN610887	uncultured_fungus
GL47849	IGJRWKL02G4P8V	TTGCGCCCCTTGGTATTCCGGGGGGCATGCCTGTTCGAGCGTCATTATAACTAATCCAGCTTGCTGGGTCTTGGGCTATCGCCTCCCTGGCGGGCCTTAAAAACAGTGGCGGTGCTCTCAAGCTCTACGCGTAGTAATTATTCTCGCTATTGGGTCTTGAGGGATGCTTGCCAACAACCCCCAACTTCTTAGGTTGACCTCGGATCAGGTAGGGATACCCGCTGAACTTAA	AB481255	SH209224.06FU		Saprotroph		Fungi	Ascomycota	Leotiomycetes	Helotiales	Hyaloscyphaceae	Lachnum	AB267645	Lachnum_fuscescens
GL47993	ID1YYUI01BAZ7M	CTAGACTCGTCATCGATGAAGAACGCAGCGAAATGCGATAAGTAATGTGAATTGCAGAATTCAGTGAATCATCGAATCTTTGAACGCACATTGCGCCCCTTGGTATTCCGGGGGGCATGCCTGTTCGAGCGTCATTTATACCAATCTAGCCTGGCTAGGTGTTGGGCTTCGCCAGCTGGCGGGCCTTAAAACTAGTGGCGGTGCTCTTCAGCTCTACGCGTAGTAATTTTTCTCGCTATAGGGTCTGGGGAGATGCTGGCCAGCAACCCCAAATTTTTCTAGGTTGACCTCGGATCAGGTAGGGATACCCGCTGAACTTAA	FM172814	SH189778.06FU		Saprotroph		Fungi	Ascomycota	Leotiomycetes	Helotiales	Hyaloscyphaceae	Lachnum	HM239967	uncultured_Ascomycota
GL45708	ID03IXK02H0Z1U	CTAGACTCGTCATCGATGAAGAACGCTGCGAAATGCGATAATTAATGTGAATTGCAGAATTTAGTGAATCATCGAATCTTTGAACGCACATTGCGCCCCTTGGTATTCCGGGGGGCATGCCTGTTCGAGCGTCATTTCAACCCTCAAGCTCTGCTTGGTCTTGGGCCGCGCCGGCAACGGCGGGCCTCAAAAACAGTGGCGACGCCATCGTGTCCCTCAGCGTAGTAATTCTTCTCGCTGTTGGGCCCCGGTGGCCGCTGGCCAGCAACCCCCAATTTTTCTATGGTTGACCTCGGATCAGGTAGGGATACCCGCTGAACTTAA	KC457014	SH208246.06FU		Saprotroph		Fungi	Ascomycota	Leotiomycetes	Helotiales	Hyaloscyphaceae	Pezizella	JF908571	Pezizella_discreta
GL50400	IJOVCJS01DW3X9	CATCGACACCGATGAAGAACGCAGCGAAATGCGATAAGTAATGTGAATTGCAGAATTTAGTGAATCATCGAATCTTTGAACGCACATTGCGCCCTCTGGTATTCCGGAGGGCATGCCTGTTCGAGCGTCATTACAACCCTCAAGCCCAGCTTGGTATTGGGCCGCGCCGCTTGGCCGGCCCCAAAGACAACGGTGGCGCCCCCCGGCCCTCAGCGTAGTAAATATCTCGCTGTAGGGACCGTGGTGGTGTCGACACCTTAACCACACAAGGTTGACCTCGGATCAGGTAGGGATACCCGCTGAACTTAA	AY775054	SH222998.06FU		Saprotroph		Fungi	Ascomycota	Leotiomycetes	Helotiales	Hyaloscyphaceae	Polydesmia	FN610923	uncultured_fungus
GL46664	ID1YYUI01ESWY8	CTAGACTCGTCATCGATGAAGAACGCAGCGAAATGCGATAAGTAATGTGAATTGCAGAATTCAGTGAATCATCGAATCTTTGAACGCACATTGCGCCCTGTGGTATTCCGCAGGGCATGCCTGTTCGAGCGTCAGTACAACACTCAAGCATAGCTTGGTATTGAACCATATCCGCAAGGATCGGTTTTAAAATCAGTGGCGGCGCCATCTGGCTCTAAGCGTAGTAATTCTTCTCGCTTCTGGGTCTTGGTGGATGCTGGCCAGCAACCCCCAACTTTCTAAGTTTGACCTCGGATCAGGTAGGGATACCCGCTGAACTTAA	HE603987	SH209257.06FU		Saprotroph		Fungi	Ascomycota	Leotiomycetes	Helotiales	Hyaloscyphaceae	Xenopolyscytalum	EF619866	uncultured_Ascomycota|Chalara|
GL39220	IGJRWKL02FJFT8	CTAGACTCGTCATCGATGAAGAACGTGGCGAAATGCGATAAGTAATGTGAATTGCAGAATTCAGTGAATCATCGAATCTTTGAACGCACATTGCGCCCTCTGGTATTCCGGGGGGGCATGCCTGTTCGAGCGTCATTACAACCCTCAAGCTCTGCTTGGTATTAAGCTTCACCTGAAAAGGCGGGCTCTAAAATCAGTGGCGGTGCCATTCGGCTTCAAGCGTAGTAATTTTTCTCGCTTTGGATGACCGGTTGCGTGCCTGCCATAACCCAAAATTTTATCAAAGGTTGACCTCGGATCAGGTAGGGATACCCGCTGAACTTAA	AY969964	sequence missing from global key		Saprotroph		Fungi	Ascomycota	Leotiomycetes	Helotiales	Leotiaceae	Alatospora	JX915540	uncultured_fungus
GL46073	IJOVCJS01ECL6O	ATTGCGCCCTCTGGTATTCCGGGGGGCATGCCTGTTCGAGCGTCATTACAACCCTCAAGCTCTGCTTGGTATTGGGCTTCACCCGTAAGGGCGGGCCTTAAAATCAGTGGCGGTGCCATTCGGCTTCAAGCGTAGTAATTTTCTCGCTTTGGAGTACCGGTTGCGTGCCTGCCAGCAAACCCCAAATTTTTTAAAGGTTGACCTCGGATCAGGTAGGGATACCCGCTGAACTTAA	FJ553143	SH209315.06FU		Saprotroph		Fungi	Ascomycota	Leotiomycetes	Helotiales	Leotiaceae	Alatospora	HQ432991	uncultured_Ascomycota
GL03523	ID1YYUI01BACOX	CTAGACTCGTCAACGATGAAGAACGCAGCGAAATGCGATAAGTAATGCGAATTGCAGAATTCAGTGAGTCATCGAATCTTTGAACGCACATTGCGCCCTGTGGTATTCCGCAGGGCATGCCTGTTCGAGCGTCATTTCAACCCTCAAGCACTGCTTGGTGTTGGGCCCTGCCCGTCGCGGCCGGCCCTAAAGACAGTGGCGGCGCCGTCTGGCTCTAAGCGTAGTACAACTCTCGCTCTGGAGTCCTGCGGTAGCTTCGCCAGAACCCCTAATCTTATGGTTGACCTCGGATCAGGTAGGGATACCCGCTGAACTTAA	AF062787	SH217744.06FU		Saprotroph		Fungi	Ascomycota	Leotiomycetes	Helotiales	Myxotrichaceae	Oidiodendron	FJ553984	uncultured_ectomycorrhiza_(Oidiodendron)
GL03525	ID1YYUI01DU56S	CTAGACTCGTCACCGATGAAGAACGCAGCGAAATGCGATAAGCAATGCGAATTGCAGAATTCAGTGAGTCATCGAATCTTTGAACGCACATTGCGCCCTGTGGTATTCCGCAGGGCATGCCTGTTCGAGCGTCATTTCAACCCTCAAGCCTCGCTTGGTGTTGGGCCCTGCCCGCCGCGGCCGGCCCTAAAGATAGTGGCGGCGCCGCCTGGCCCTCAGCGTAGTACAGCTCTCGCTCCAGGGTCCGGCGGCAGCCTGCCAGAACCCCCCAACTCTGTGGTTGACCTCGGATCAGGTAGGGATACCCGCTGAACTTAA	FN661517	SH217741.06FU		Saprotroph		Fungi	Ascomycota	Leotiomycetes	Helotiales	Myxotrichaceae	Oidiodendron	JX243860	Oidiodendron_sp_PDKA8
GL03610	IJOVCJS01CFZJY	CTAGACTCGTCATCGATGAAGAACGCTGCGAAATGCGATAAGTAATGCGAATTGCAGAATTCAGTGAGTCATCGAATCTTTGAACGCACATTGCGCCCTGTGGTATTCCGCAGGGCATGCCTGTTCGAGCGTCATTTCAACCCTCAAGCTCTGCTTGGTGTTGGGCCCAGCCCGTCGCGGCCGGCCCCAAAGACAGTGGCGGCGCCGTCGGGCCCTAAGCGTAGTACATCTCTCGCTCTAGGGCCCCGTGGTGGCTTGCCAGCAACCCCAACTCCCCTATGGTTGACCTCGGATCAGGTAGGGATACCCGCTGAACTTAA	FJ475803	SH217754.06FU		Saprotroph		Fungi	Ascomycota	Leotiomycetes	Helotiales	Myxotrichaceae	Oidiodendron	HM069451	uncultured_fungus
GL49359	ID1YYUI01DOIN4	AGTATCTAGACTCGTCAACGATGAAGAACGCAGCGAAATGCGATAAGTAATGCGAATTGCAGAATTCAGTGAGTCATCGAATCTTTGAACGCACATTGCGCCCTGTGGTATTCCGCAGGGCATGCCTGTTCGAGCGTCATTTCAACCCTCAAGCTCTGCTTGGTGTTGGGCCCTGCCCGCTGCGGCCGGCCCCAAAGACAGTGGCGGTGCCGCCTGGCCCTGAGCGTAGTACATCTCTCGCTCCAGTGTCCGGCGGTGGCCTGCCAGAACCCAAACTCTCGTGGTTGACCTCGGATCAGGTAGGGATACCCGCTGAACTTAA	AF062793	SH217750.06FU		Saprotroph		Fungi	Ascomycota	Leotiomycetes	Helotiales	Myxotrichaceae	Oidiodendron	AF062796	Oidiodendron_griseum
GL49790	ID03IXK02FN7KZ	CTAGACTCGTCATCGATGAAGAACGCAGCGAAATGCGATAAGTAATGCGAATTGCAGAATTCAGTGAGTCATCGAATCTTTGAACGCACATTGCGCCCTGTGGTATTCCGCAGGGCATGCCTGTTCGAGCGTCATTTCAACCCTCAAGCACTACTTGGTGTTGGGCCCTGCCCGTCGCGGCCGGCCCTAAAGACAGTGGCGGCGCCGTCTGGCTCTAAGCGTAGTACAACTCTCGCTCTGGAGTCCTGCGGTCGCTTGCCAGAACCCCTAATCTTATGGTTGACCTCGGATCAGGTAGGGATACCCGCTGAACTTAA	AF062787	SH217744.06FU		Saprotroph		Fungi	Ascomycota	Leotiomycetes	Helotiales	Myxotrichaceae	Oidiodendron	FJ553984	uncultured_ectomycorrhiza_(Oidiodendron)
GL48581	ID1YYUI01B69N9	CTAGACTCGTCATCGATGAAGAACGCAGCGAAATGCGATAAGTAATGTGAATTGCAGAATTCAGTGAATCATCGAATCTTTGAACGCACATTGCGCCCTGTGGTATTCCGCAGGGCATGCCTGTTCGAGCGTCATTATAGCCACTCAAGCCTCGCTTGGTGTTGGGGCTCGCAATCTTGCGGCCTCTAAAATCAGTGGCGGTGCCGGTAGGCTCTGAGCGTAGTACATCTCCTCGCTATAGAGTCCTGTCGGTCCCCTGCCAAAACCCCCATATTTTATAGGTTGACCTCGGATCAGGTAGGGATACCCGCTGAACTTAA	EU434824	SH229443.06FU		Saprotroph		Fungi	Ascomycota	Leotiomycetes	Helotiales	Vibrisseaceae	Acephala	FR837920	Mollisia_minutella
GL47582	ID03IXK02GLMQ6	AACGCACATTGCGCCCTGTGGTATTCCGCAGGGCATGCCTGTTCGAGCGTCATTACAACCACTCAGGCCTGGCTTGGTATTGGGGTTTGCGGTTCCGCAGCCCCTAAAATCAGTGTCGGTGCCGGTGTGGCTCTACGCGTAGTAATTCTTCTCGCGATGGAGTTCCCCTGGAGACCTGCCAGAACCCCCCAATTTTTACAGGTTGACCTCGGATCAGGTAGGGATACCCGCTGAACTTAA	AY354269	SH213472.06FU		Saprotroph		Fungi	Ascomycota	Leotiomycetes	Helotiales	Vibrisseaceae	Phialocephala	JN655576	Helotiales_sp_2_MV_2011
GL48200	IJOVCJS01BDLM4	GCAGAATTCAGTGAATCATCGAATCTTTGAACGCACATTGCGCCCCGTGGTATTCCGCGGGGCATGCCTGTTCGAGCGTCATTATGACCACTCAAGCCTAGCTTGGTGTTGGGGCACGCGGTTCCGCGGCCCTCAAATCTAGTGGCGGCGCCGGTAGGCTCTAAGCGTAGTAAAACTTCTCGCTTCAGGGTCCTCTTGGTAGCTCTCCAGAACCCCCCAACTTCTTAAGGTTGACCTCGGATCAGGTAGGGATACCCGCTGAACTTAA	EU434843	SH203639.06FU		Saprotroph		Fungi	Ascomycota	Leotiomycetes	Helotiales	Vibrisseaceae	Phialocephala	JX860452	uncultured_Helotiales
GL48485	IGJRWKL02FI6FI	CTAGACTCGTCAACGATGAAGAACGCAGCGAAATGCGATAAGTAATGTGAATTGCAGAATTCAGTGAATCATCGAATCTTTGAACGCACATTGCGCCCTGTGGTATTCCGCAGGGCATGCCTGTTCGAGCGTCATTTAGACCACTCACGCCTGGCGTGGTATTGGGGCACGCGGTTCCGCGGCCCTCAAAATCAGTGGCGGCGCCGGTAGGCCCTAAGCGTAGTAAATCTCCTCGCTATAGGGTCCTCTCGGTGGCTCGCCAGAACCCCCAACTTCTCAAGGTTGACCTCGGATCAGGTAGGGATACCCGCTGAACTTAA	AM231338	SH234170.06FU		Saprotroph		Fungi	Ascomycota	Leotiomycetes	Helotiales	Vibrisseaceae	Phialocephala	AB671498	Phialocephala_dimorphospora
GL48624	ID1YYUI01BCKUL	CTAGACTCGTCATCGATGAAGAACGCTGCGAAATGCGATAAGTAATGTGAATTGCAGAATTCAGTGAATCATCGAATCTTTGAACGCACATTGCGCCCCGTGGTATTCCGCGGGGCATGCCTGTTCGAGCGTCATTATGACCACTCACGCCTGGCGTGGTGTTGAGGCACGCGGTTCCGCGGCCCTCAAATCCAGTGGCGGCGCCGGTTGGCTCTAAGCGTAGTAAAACTTCTCGCTTGAGGGTCCTCCCGGTGGCTCGCCAGAACCCCCAACTTCTTAAGGTTGACCTCGGATCAGGTAGGGATACCCGCTGAACTTAA	EU434843	SH203639.06FU		Saprotroph		Fungi	Ascomycota	Leotiomycetes	Helotiales	Vibrisseaceae	Phialocephala	AY606299	Phialocephala_glacialis
GL44839	ID03IXK02JP45F	ACATTGCGCCCGGTGGCATTCCGCCGGGCATGCCTGTTCGAGCGTCATTTAAACCAATCCAGCCTCGTGCTTGGGTCTTGGGCCTTTCGCCTCTGGGCGGGCCTCAAAATCAGTGGCGGTGCCTCCTGGCTCTACGCGTAGTAATACTTCTCGCTATAGATGTCTGGTGGTGTCCTGCCAAAACCCCCTCATTTTTTAAGGTTGACCTCGGATCAGGTAGGGATACCCGCTGAACTTAA	DQ914672	SH230780.06FU		Saprotroph		Fungi	Ascomycota	Leotiomycetes	Helotiales		Cystodendron	JX852354	Helotiales_sp_I12F_02284
GL39303	ID1YYUI01D990C	CTAGACTCGTCATCGATGAAGAACGCAGCGAAATGCGATAAGTAATGTGAATTGCAGAATTCAGTGAATCATCGAATCTTTGAACGCACATTGCGCCCCTTGGTATTCCGGGGGGCATGCCTGTTCGAGCGTCATTTCAACCCTCAAGCTCAGCTTGGTCTTGGGCCCTGCCGGTAACGGCTGGCCTTAAAATCAGTGGCGGTGCTATCGAGCTCTACGCGTAGTAATTAACCCTCGCGATTGAGTCTCGGTGGACGCTGGCCAGCAACCCCCAATTTTCTATGGTTGACCTCGGATCAGGTAGGGATACCCGCTGAACTTAA	FM172897	SH209235.06FU		Saprotroph		Fungi	Ascomycota	Leotiomycetes	Helotiales		Phialea	HQ433033	uncultured_Ascomycota
GL50966	IGJRWKL02GVU4V	CTAGACTCGTCATCGATGAAGAACGCTGCGAAATGCGATAAGTAATGTGAATTGCAGACACCGTGAATCATCGAATCTTTGAACGCACATTGCGCCCTTTGGTATTCCGAAGGGCATGCCTGTTCGAGCGTCATTACACTATTCTTCGGAGTATTGGCACTGGCTTACGCCTTGCCTAAAACACTTGGTGGTAACTATCAATCACGCATAGTAATCTCTGCGAAGGCTGATAGGTAAACACCTTAAAACTCTTTTGTTTGACCTCGGATCAGGTAGGGATACCCGCTGAACTTAA	AY487088	SH197204.06FU		Plant pathogen		Fungi	Ascomycota	Leotiomycetes	Helotiales		Pilidium	AY487091	Pilidium_acerinum
GL51050	ID1YYUI01AJXC7	CTAGACTCGTCATCGATGAAGAACGCTGCGAAATGCGATAAGTAATGTGAATTGCAGACACCGTGAATCATCGAATCTTTGAACGCACATTGCGCCCTTTGGTATTCCGAAGGGCATGCCTGTTCGAGCGTCATTACACTATTCTTCGGAGTATTGACAGTGGCTTACGCCTTGTCTAAAACCCTTGGTGGTAACTATCAATCACGCATAGTAATCTCTGCGAAGGTGGATAGGTAAACACTGAAAACTTCTTGTTTGACCTCGGATCAGGTAGGGATACCCGCTGAACTTAA	AM231361	SH197203.06FU		Plant pathogen		Fungi	Ascomycota	Leotiomycetes	Helotiales		Pilidium	KC614564	Pilidium_concavum
GL44543	IGJRWKL02HEM40	CTAGACTCGTCATCGATGAAGAACGTAGCGAAATGCGATAAGTAGTGTGAATTGCAGAATTCAGTGAATCATCGAATCTTTGAACGCACATTGCGCCCTTCGGTATTCCGTTGGGCATGCCTGTTCGAGCGTCATTTAACCATTCAAGCTCTGCTTGGTGTTGGGTGTTTGTTCCGCCTCAGCGCGTGGACTCGCCTTAAATTCATTGGCAGCCGGTATGTTGGCTTCGTGCGCAGCACATTGCGTCGCGATTCTGGCAGGCCTCCTCCCGTTAAGCTTCTTTTAAGTTTGACCTCGGATCAGGTAGGGATACCCGCTGAACTTAA	GQ179993	SH194646.06FU		Saprotroph		Fungi	Ascomycota	Leotiomycetes	Helotiales		Trichocladium	KC180726	Trichocladium_cf_opacum_GPO_LL_03_C7
GL04894	ID1YYUI01EIQKS	GGTCCCCTGTGTGCCTTGAGAGACGCCGACCACACCTAGTATCTAGACTCGTCACCGATGAAGAACGCAGCGAAATGCGATAAGTAGTGTGAATTGCAGAATTCAGTGAATCATCGAATCTTTGAACGCACATTGCGCCCTTCGGTATTCCGTTGGGCATGCCTGTTCGAGCGTCATTTAATCATTCAAGCTCTGCTTGGTGTTGGGTGTTTGTTCCGCCTCAGCGCGTGGACTCGCCTTAAATTCATTGGCAGCCGGTATGTTGGCTTCGTGCGCAGCACATTGCGTCGCGATTCTGGCAGGCCTCCTCCCATTAAGCTTCTTTTAAGTTTGACCTCGGATCAGGTAGGGATACCCGCTGAACTTAA	GQ179993	SH194646.06FU		Saprotroph		Fungi	Ascomycota	Leotiomycetes	Helotiales		Trichocladium	KC180726	Trichocladium_cf_opacum_GPO_LL_03_C7
GL38909	IJOVCJS01EOLYB	CTAGACTCGTCATCGATGAAGAACGCTGCGAAATGCGATAAGTAATGTGAATTGCAGAATTCAGTGAAATCATCGAATCTTTGAACGCACATTGCGCCCCGTGGTATTCCGCGGGGCATGCCTGTTCGAGCGTCAGTACAACACTCAAGCTCTGCTTGGTCTTGAGCCCCGCCGGCAACGGCAGGCTTTAAAATCAGTGGCGGCGCCACCTGGCTCTAAGCGTAGTAATACACCCCGCTACAGTGTCCCGGTGGCTGCTTGCCAGCAACCCCCAACTTCTAAGTTTGACCTCGGATCAGGTAGGGATACCCGCTGAACTTAA	JF300464	SH208266.06FU		Saprotroph		Fungi	Ascomycota	Leotiomycetes	Helotiales		Xenochalara	JF300464	uncultured_fungus
GL48201	IJOVCJS01B2VZO	CTAGACTCGTCATCGATGAAGAACGCTGCGAAATGCGATAAGTAATGTGAATTGCAGAATTCAGTGAATCATCGAATCTTTGAACGCACATTGCGCCCCGTGGTATTCCGCGGGGCATGCCTGTTCGAGCGTCAGTACAACCCTCAAGCTCAGCTTGGTCTTGAGCCCCGCCGGCAACGGCAGGCTTTAAAATCAGTGGCGGCGCCCCTGGGCTCTCAGCGTAGTAATACACCCCGCTGTAGAGCCCCAGTGGATGCTGGCCAGCAACCCCCAACTTCTACGTTTGACCTCGGATCAGGTAGGGATACCCGCTGAACTTAA	JN604462	SH208253.06FU		Saprotroph		Fungi	Ascomycota	Leotiomycetes	Helotiales		Xenochalara	JX869564	Xenochalara_juniperi
GL38354	ID1YYUI01CY99P	CTAGACTCGTCACCGATGAAGAACGCAGCGAAATGCGATAAGTAATGTGAATTGCAGAATTCAGTGAATCATCGAATCGGTTTGAACGCACATTGCGCCCTGTGGTATTCCGCAGGGCATGCCTGTTCGAGCGTCAGTACAACACTCAAGCTTGGCTTGGTATTGAACCACGTCCGCAAGGACCGGTTTTAAAATCAGTGGCGGCGCCATCTGGCTCTAAGCGTAGTAATACTCCTCGCTTTTGGGTCCTGATGGATGTTGGCCAGCAACCCCCAACTTTCTAAGTTTGACCTCGGATCAGGTAGGGATACCCGCTGAACTTAA	EF619866	SH209350.06FU		Saprotroph		Fungi	Ascomycota	Leotiomycetes	Helotiales		Xenopolyscytalum	HE603989	Xenopolyscytalum_sp_CCF_4159
GL47989	ID1YYUI01DC300	CTAGACTCGTCAACGATGAAGAACGCAGCGAAATGCGATAAGTAATGTGAATTGCAGAATTCAGTGAATCATCGAATCTTTGAACGCACATTGCGCCCTGTGGTATTCCGCAGGGCATGCCTGTTCGAGCGTCAGTACAACACTCAAGCTCAGCTTGGTATTGAGCCGCGTCCGCAAGGGCCGGCTTTAAAATCAGTGGCGGCGCCATCTGGCTCTAAGCGTAGTAATACTCCTCGCTTCTGGGTCCCGGTGGATGCTGGCCAGCAACCCCCAACTTCTAAGTTTGACCTCGGATCAGGTAGGGATACCCGCTGAACTTAA	JX852343	SH208279.06FU		Saprotroph		Fungi	Ascomycota	Leotiomycetes	Helotiales		Xenopolyscytalum	JX852343	Xenopolyscytalum_sp_I12F_02273
GL46240	IJOVCJS01B1THQ	CTAGACTCGTCATCGATGAAGAACGCAGCGAAATGCGATAAGTAATGTGAATTGCAGAATTCAGTGAATCATCGAATCTTTGAACGCACATTGCGCCCTCTGGTATTCCGGGGGGCATGCCTGTTCGAGCGTCATTACAACCCTCAAGCATTGCTTGGTATTAGGCTCCGCCGCTCACCCGGCGGGCCTTAAAACTAGTGGCGGTGCCGTCGAGGCCCTGAGCGCAGTAAATATCCTCGCTATAGGGACCCGGTGGACACTTGCCATCAACCCCCACTTTCCAAGTTTGACCTCGGATCAGGTAGGGATACCCGCTGAACTTAA	HM069448	SH209317.06FU				Fungi	Ascomycota	Leotiomycetes	Helotiales			HM069448	uncultured_fungus|Helotiales|
GL47213	IGJRWKL02H2LI5	CTAGACTCGTCAACGATGAAGAACGCAGCGAAATGCGATAAGTAATGTGAATTGCAGAATTCAGTGAATCATCGAATCTTTGAACGCACATTGCGCCTAGCGGTATTCCGCTAGGCATGCCTGTTCGAGCGTCATTTCAACCCTCAAGCCTAGCTTGGTATTGGGTGTCACCGGCACGGTGCGCCTTAAAATCAGTGGCGGTGCCATCTGGCTTCAAGCGTAGTAATACTTCTCGCTCTGGATCCCGGGTGGTTACTTGCCAACAACCCCATATTTTTTAAGGTTGACCTCGGATCAGGTAGGGATACCCGCTGAACTTAA	GQ892250	SH208863.06FU				Fungi	Ascomycota	Leotiomycetes	Helotiales			GQ892250	uncultured_soil_fungus
GL47282	ID1YYUI01C5GIB	CTAGACTCGTCATCGATGAAGAACGTAGCGAAATGCGATAAGTAATGTGAATTGCAGAATTCAGTGAATCATCGAATCTTTGAACGCACATTGCGCCCCTTGGTATTCCGGGGGGCATGCCTGTTCGAGCGTCATTATAACCCCTCAAGCTCAGCTTGGTGTTGGGGCCTGCCAACTGGCAGCCCTTAAAATCAGTGGCGGCGCCATCTGGCTCTAAGCGTAGTAATTTCTCTCGCTATAGGGTCCCGGTGGACGCTGGCCAGCAACCCCCAATTTTTTAATGGTTGACCTCGGATCAGGTAGGGATACCCGCTGAACTTAA	GU055742	SH209211.06FU				Fungi	Ascomycota	Leotiomycetes	Helotiales			HQ432986	uncultured_Ascomycota|Helotiales|
GL03140	ID1YYUI01BBY9Y	CTAGACTCGTCACCGATGAAGAACGCAGCGAAATGCGATAAGTAATGTGAATTGCAGAATTCAGTGAATCATCGAATCTTTGAACGCACATTGCGCCCCTTGGTATTCCGAGGGGCATGCCCGTTCGAGCGTCATCAACACCATCAAGCCTGGCTTGGTATTGGGCCTTGCCTGTAACACGGCCGGCTTTAAAATCAGTGGCGGTGCCGCCTGGCTCTAAGCGTAGTAACTTTTCTCGCTATTGTGCCCGGCGGTTGCTTGCCAACAACCCCCTAATTTAATAGATTTGACCTCGGATCGGGTAGGGATACCCGCTGAACTTAA	HM069412	SH209209.06FU				Fungi	Ascomycota	Leotiomycetes	Helotiales			EU292256	uncultured_fungus
GL05004	IGJRWKL02GOPLY	CTAGACTCGTCATCGATGAAGAACGCAGCGAAATGCGATAAGTAATGAGAATTGCAGAATTCAGTGGATCATCGAATCTTTGAACGCACATTGCGCCCCTTGGTATTCCGAGGGGCATGCCTGTTCGAGCGTCATTTCAACCCTCAAGCTCTGCTTGGTCTTGGGCCTGGCCGTGATGGCCGGTCTTAAAATCAGTGGCGGTGCCGTCGCAGGCTCCAAGCGTAGTACATCTCTCGCTCTGGAAACCTGGCGGTGCCTGCCAGACAACCCCTAATTGTCTCTTTCGGTTGACCTCGGATCAGGTAGGGATACCCGCTGAACTTAA	AY787735	SH209217.06FU				Fungi	Ascomycota	Leotiomycetes	Helotiales			EU715657	Helotiales_sp_SGSGf25
GL28616	ID03IXK02GYF66	TTGCAGAATTCAGTGAATCATCGAATCTTTGAACGCACATTGCGCCCGCCAGTATTCTGGCGGGCATGCCTGTTCGAGCGTCATTTCAACCCTCGAGCCCGACTCTGTATAGAGAACGGCCCGGTGTTGGGGACCGGCAATAGTGGAGACTTGTGCTCCGCGCCGCCCCCGAAATTTAGTGGCGGCCCTCTGAGGCGACCTCTGCGTAGTAATTTTATCTCGCACTGGAAAACTCAGGGTGGCCACGCCGTAAAACCCCCGACTTTTTTAAGGTTGACCTCGAATCAGGTAGGACTACCCGCTGAACTTAA	DQ489301	SH235673.06FU				Fungi	Ascomycota	Leotiomycetes	Helotiales			GU054060	uncultured_fungus
GL38095	IGJRWKL02JVZ0L	CTAGACTCGTCATCGATGAAGAACGCTGCGAAATGCGATAAGTAATGTGAATTGCAGAATTCAGTGAATCATCGAATCTTTGAACGCACATTGCGCCTAGCGGTATTCCGCTAGGCATGCCTGTTCGAGCGTCATTTCAACCCTCAAGCCTAGCTTGGTATTGGGTGTCAACCGGCACGGTGCGCCTTAAAATCAGTGGCGGTGCCATCTGGCTTCAAGCGTAGTAATACTTCTCGCTCTGGATCCCGGGTGGTTACTTGCCAACAACCCCATATTTTTAAGGTTGACCTCGGATCAGGTAGGGATACCCGCTGAACTTAA	GQ892250	SH208863.06FU				Fungi	Ascomycota	Leotiomycetes	Helotiales			GQ892250	uncultured_soil_fungus
GL39059	ID03IXK02G4KBA	CTAGACTCGTCATCGATGAAGAACGCAGCGAAATGCGATAAGTAATGTGAATTGCAGAATTCAGTGAATCATCGAATCTTTGAACGCACATTGCGCCCTCTGGTATTCCGGGGGGCATGCCTGTTCGAGCGTCATTACAACCCTCAAGCATTGCTTGGTATTAGGCTCCGCCGCTCACCCGGCGGGCCTTAAAACTAGTGGCGGTGCCGTCGAGGCCCTGAGCGCAGTAAATATCCTCGCTATAGGGACCCGGTGGACACTTGCCATCAACCCCCACTTTCTAAGTTTGACCTCGGATCAGGTAGGGATACCCGCTGAACTTAA	HM069448	SH209317.06FU				Fungi	Ascomycota	Leotiomycetes	Helotiales			HM069448	uncultured_fungus|Helotiales|
GL39306	IGJRWKL02I31DX	CTAGACTCGTCAACGATGAAGAAAGCAGCGAAATGCGATAAGTAATGTGAATTGCAGAATTCAGTGAATCATCGAATCTTTGAACGCACATTGCGCCCTCTGGTATTCCGGAGGGCATGCCTGTTCGAGCGTCATAATGACCAACTCACCCCCGTGGTGGACTTGGAGCTGGCCGGTCTGGCCTCTCTTAAAACCAGTGGCGGTGCTCTTAAGCTCTACGCGTAGTAATTTCTCTCGCGACAGGGTCTTGATGGTGCTTGCCAACAACCCCAACTCTTATAAGGTTGACCTCGGATCAGGTAGGGATACCCGCTGAACTTAA	AF502859	SH220880.06FU				Fungi	Ascomycota	Leotiomycetes	Helotiales			JF449482	uncultured_Leotiomycetes
GL40715	ID1YYUI01A7YOK	CTAGACTCGTCATCGATGAAGAACGCTGCGAAATGCGATAAGTAATGTGAATTGCAGAATTCAGTGAATCATCGAATCTTTGAACGCACATTGCGCCCCTTGGTATTCCGAGGGGCATGCCTGTTCGAGCGTCATTACAACCCTCAAGCTCTGGCTTGGTATTGGGCATCACCCGTCAGGGCGTGCCTTAAAGACAGTGGCGGCGCCATCTGGCTCTAAGCGTAGTAATTCTCTCGCTATAGGGTCCTGTGGATGCTTGCCAGCAACCCTAATTTTATCTATGGTTGACCTCGGATCAGGTAGGGATACCCGCTGAACTTAA	GU174278	SH209344.06FU				Fungi	Ascomycota	Leotiomycetes	Helotiales			HM488471	uncultured_Helotiales
GL44993	IJOVCJS01ARPKP	CTAGACTCGTCACCGATGAAGAACGCAGCGAAATGCGATAAGTAATGTGAATTGCAGAATTCAGTGAATCATCGAATCTTTGAACGCACATTGCGCCCTTTGGTATTCCGAGGGGCATGCCTGTTCGAGCGTCATTACAACCCTCAAGCCTTGCTTGGTATTGGGGCTCCGCTACTCACCTAGCGGGCCTTAAAATCAGTGGCGGTGCCGTCGAGGCCCTGAGCGCAGTAAATATCCTCGCTATAGGGACCCGGTGGACGCTGGCCAGCAACCCCCAACTTTCTAAGTTTGACCTCGGATCAGGTAGGGATACCCGCTGAACTTAA	AM999547	SH209192.06FU				Fungi	Ascomycota	Leotiomycetes	Helotiales			JQ272327	Helotiales_1_RB_2011
GL45078	IGJRWKL02IRHXP	CTAGACTCGTCATCGATGAAGAACGCTGCGAAATGCGATAAGTAATGTGAATTGCAGAGTTCAGTGAATCATCGAATCTTTGAACGCACATTGCGCCCCTTGGTATTCCGAGGGGCATGCCTGTTCGAGCGTCATTACAACCCTCAAGCCTAGCTTGGTATTGGGCTCCGTCACTCACCTGGCGGGCCTTAAAATCAGTGGCGGTGCCTCCGTGGCCCTGAGCGCAGTAAACATCCTCGCTATAGGGACTCGGTGGTTGCTTGCCAACAACCCCATACTTTCTAAGTTTGACCTCGGATCAGGTAGGGATACCCGCTGAACTTAA	AY465448	SH209225.06FU				Fungi	Ascomycota	Leotiomycetes	Helotiales			HQ845750	Helotiales_sp_PIMO_255
GL45170	IGJRWKL02G58LT	CTAGACTCGTCAACGATGAAGAACGCAGCGAAATGCGATAAGTAATGTGAATTGCAGAATTCAGTGAATCATCGAATCTTTGAACGCACATTGCGCCCCTTGGTATTCCGGGGGGCATGCCTGTTCGAGCGTCATTTCAACCCTCAAGCCTAGCTTGGTCTTGGGCTCTGCCGGTAACGGCTGGCCTTAAAATCAGTGGCGGTGCCATCGAGCTCTACGCGTAGTAATTAAACCCTCGCGTGTGAGTCTCGTTGAGTGCTTGCCAGTAACCCCCAATTTTCTATGGTTGACCTCGGATCAGGTAGGGATACCCGCTGAACTTAA	JF449481	SH209242.06FU				Fungi	Ascomycota	Leotiomycetes	Helotiales			JF449649	uncultured_Helotiales
GL45191	ID1YYUI01DDLV7	TAGACTCGTCATCGATGGAAGAACGCTGCGAAATGCGATAAGTAATGTGAATTGCAGAATTCAGTGAATCATCGAATCTTTGAACGCACATTGCGCCCTCTGGTATTCCGGGGGGCATGCCTGTTCGAGCGTCATTACAACCCTCAAGCTCTGCTTGGTATTAGGCCTCGCCCGTTAGGGCGGGCTGTAAAATCAGTGGCGGTGCCATTCGGCTTCAAGCGTAGTAATTTTTCTCGCTTTGGAGTACCGGGTGTGTGCCTGCCAGCAACCCCAAATTTTATCAAAGGTTGACCTCGGATCAGGTAGGGATACCCGCTGAACTTAA	KC966006	SH207339.06FU				Fungi	Ascomycota	Leotiomycetes	Helotiales			JX852366	Helotiales_sp_I12F_02296
GL45387	IGJRWKL02IP4GX	CTAGACTCGTCAACGATGAAGAACGCAGCGAAATGCGATAAGTAATGTGAATTGCAGAATTCAGTGAATCATCGAATCTTTGAACGCACATTGCGCCCCTTGGTATTCCGGGGGGCATGCCTGTTCGAGCGTCATTACACCCCTCAAGCATTGCTTGGTGTTGGGCTCCGCTGCTCACGCGGCGGGCCTTAAAATCAGTGGCGGTGCCGTCGGGCCCTGAGCGCAGTAAATATCCTCGCTACAGGGACCCGGTGGACGCTGGCCATCAACCCCCAACTTTCTAAGTTTGACCTCGGATCAGGTAGGGATACCCGCTGAACTTAA	JQ393059	SH215668.06FU				Fungi	Ascomycota	Leotiomycetes	Helotiales			FN565261	uncultured_Helotiales|Helotiales|
GL45409	IGJRWKL02JM9Y0	CTAGACTCGTAAACGATGAAGAACGCAGCGAAGTGCGATAAGTAATGTGAATTGCAGAATTCAGTGAATCATCGAATCTTTGAACGCACATTGCGCCCCCTGGTATTCCGGGGGGCATGCCTGTTCGAGCGTCATTACAACCCTCAAGCAATGCTTGGTATTGGGCTCCGCCGCTTACCCGGCGGGCCTTCAAACCAGTGGCGGCGCCGTCGAGGCCCTGAGCGTAGTAAATCTCCTCGCTATAGGGACCCGGCGGACGCTGGCCATCAACCCCCACCTTCTTAGTTTGACCTCGGATCAGGTAGGGATACCCGCTGAACTTAA	FR852291	SH215673.06FU				Fungi	Ascomycota	Leotiomycetes	Helotiales			FN565264	uncultured_Helotiales|Helotiales|
GL45932	ID1YYUI01DU2C6	ACATTGCGCCCCTTGGTATTCCGGGGGGCATGCCTGTTCGAGCGTCATTTCAACCCTCAAGCTCAGCTTGGTCTTGGGCTCTGCCGGTTACGGCTTGCCTTAAAATTAGTGGCGGTGCCATTGAGCTCTACGCGTAGTAATATAACCATCGCTTTTGAGTCTCGGTGAACGCTTGCCAACAACCCCCAATTTTTTATGGTTGACCTCGGATCAGGTAGGGATACCCGCTGAACTTAA	FM172897	SH209235.06FU				Fungi	Ascomycota	Leotiomycetes	Helotiales			AB521982	uncultured_fungus
GL45933	ID1YYUI02GA5JZ	CTAGACTCGTCATCGATGAAGAACGCTGCGAAATGCGATAAGTAATGTGAATTGCAGAATTCAGTGAATCATCGAATCTTTGAACGCACATTGCGCCCCTTGGTATTCCGAGGGGCATGCCTGTTCGAGCGTCATTACAACCCTCAAGCATTGCTTGGTATTGGGCTCCGCTGCTAATCCAGCGGGCCTTAAAATCAGTGGCGGTGCCACGAGGCCCTGAGCGTAGTAAATATCCTCGCTATAGGTGTCTCGCGGTAGCCTGCCAGCAAACCCCCACTTTCTTAGTTTGACCTCGGATCAGGTAGGGATACCCGCTGAACTTAA	AM999683	SH215682.06FU				Fungi	Ascomycota	Leotiomycetes	Helotiales			JQ272327	Helotiales_1_RB_2011
GL46511	ID1YYUI01DXNUP	ATAGACTCGTCATCGATGAAGAACGCTGCGAAATGCGATAAGTAATGTGAATTGCAGAATTCAGTGAATCATCGAATCTTTGAACGCACATTGCGCCCCGTGGTATTCCGCGGGGCATGCCTGTTCGAGCGTCATTTCAACCAATCAAGCTTCTGCTTGGTCTTGGGGCCTGCGGTTTCGCAGCCTCTAAACTCAGTGGCGGTGCTATTGAGCTCTGAGCGTAGTAATTTTTCTCGCTATAGGGTCTTCGTAGTTACTTGCCAGTAACCCCCAATTTTTATCAGGTTGACCTCGGATCGGGTAGGGATACCCGCTGAACTTAA	AM999607	SH234750.06FU				Fungi	Ascomycota	Leotiomycetes	Helotiales			FM172839	Calluna_vulgaris_root_associated_fungus
GL46808	ID03IXK02FU0BP	CTAGACTCGTCATCGATGAAGAACGCTGCGAAATGCGATAAGTAATGTGAATTGCAGAATTCAGTGAATCATCGAATCTTTGAACGCACATTGCGCCCCTTGGTATTCCGAGGGGCATGCCTGTTCGAGCGTCATTACAACCCTCAAGCTTAGCTTGGTATTGGGCTCCGCTACTTATCTAGCGGGCCTTAAAATCAGTGGCGGTGTCGTTGAGGCCCTGAGCGTAGTAAATACCCTCGCTATAGGACCCGGCGGTTGCTAGCCATCAACACCAATCTTTTTAGTTTGACCTCGGATCAGGTAGGGATACCCGCTGAACTTAA	AM999547	SH209192.06FU				Fungi	Ascomycota	Leotiomycetes	Helotiales			HM208744	fungal_sp_shylm29
GL47038	IJOVCJS01DSRHD	CACATTGCGCCCCTTGGTATTCCGAGGGGCATGCCTGTTCGAGCGTCATTACAACCCTCAAGCTCTGCTTGGTATTGGGCATCACTAGCAATAGTGGGCCTCAAAAACAGTGGCGGTGCCATCTGGCTCTAAGCGTAGTAATTCTTCTCGCTATAGATGTCTTGTGGATGCTTGCCAGCAACCCCTAATTTTTTTAAGGTTGACCTCGGATCAGGTAGGGATACCCGCTGAACTTAA	GU174278	SH209344.06FU				Fungi	Ascomycota	Leotiomycetes	Helotiales			GU174414	uncultured_fungus
GL47947	ID1YYUI01CP3E2	GGGGGCATGCCTGTTCGAGCGTCATTATAACCCCTCAAGCTCAGCTTGGTGTTGGGGCCTGCCAACTGGCAGCCCTTAAAATCAGTGGCGGCGCCATCTGGCTCTAAGCGTAGTAATTTCTCTCGCTATAGGGTCCCGGTGGACGCTGGCCAGCAACCCCCAATTTTTAATGGTTGACCTCGGATCAGGTAGGGATACCCGCTGAACTTAA	GU055742	SH209211.06FU				Fungi	Ascomycota	Leotiomycetes	Helotiales			HQ432986	uncultured_Ascomycota|Helotiales|
GL48033	ID1YYUI01DWTRL	CTAGACTCGTCACGATGAAGAACGTAGCGAAATGCGATAAGTAATGTGAATTGCAGAATTCAGTGAATCATCGAATCTTTGAACGCACATTGCGCCCCTTGGTATTCCGGGGGGCATGCCTGTTCGAGCGTCATTTCAACCCTCAAGCTCTGCTTGGTATTGGGCCCTGCTGGCAACGGCAGGCCTTAAAAACAGTGGCGGTGCCTTTAGGTCCTGAGCGTAGTACATTTCTCGCTATAGGTCCCTGAGGGTTACTGGCCAGCAACCCCAATTTTTCTATGGTTGACCTCGGATCAGGTAGGGATACCCGCTGAACTTAA	JN544514	SH209291.06FU				Fungi	Ascomycota	Leotiomycetes	Helotiales			HM044552	uncultured_Helotiales
GL48095	ID1YYUI01EKUWK	CTAGACTCGTCATCGATGAAGAACGTAGCGAAATGCGATAAGTAATGCGAATTGCAGAATTCAGTGAGTCATCGAATCTTTGAACGCACATTGCGCCCCGTGGTATTCCGCGGGGCATGCCTGTTCGAGCGTCATTTCAACCCTCAAGCTCTGCTTGGTATCGGGCCGCACCGGCGACGGTGGGTCTCAGAATCAGTGGCGGTGCCGTCTGGCTCTAAGCGTAGTAATTCTCCTCGCTATAGACGTCTGGCGGTGTCCGGCCAGCAACCCCCCATTCTTATGGTTGACCTCGGATCAGGTAGGGATACCCGCTGAACTTAA	EF521215	SH217764.06FU				Fungi	Ascomycota	Leotiomycetes	Helotiales			JF300511	uncultured_fungus
GL48150	ID03IXK02JHNXO	CTAGACTCGTCACCGATGAAGAACGCAGCGAAATGCGATAAGTAATGCGAATTGCAGAATTCAGTGAGTCATCGAATCTTTGAACGCACATTGCGCCCCGTGGTATTCCGCGGGGCATGCCTGTTCGAGCGTCATTTCAACCCTCAAGCTCTGCTTGGTATCGGGCCCCACCGGTAACGGTAGGCCTCAGAATCAGTGGCGGTGCCGTCTGGCTCTAAGCGTAGTAACTTTTCTCGCTATAGACGTCCGGCGGTGTCCTGCCAGAACCCCTAATTCTTTATGGTTGACCTCGGATCAGGTAGGGATACCCGCTGAACTTAA	EF521215	SH217764.06FU				Fungi	Ascomycota	Leotiomycetes	Helotiales			FJ475648	uncultured_Hyaloscyphaceae
GL48507	ID1YYUI01AVUCL	CTAGACTCGTCATCGATGAAGAACGCAGCGAAATGCGATAAGTAATGTGAATTGCAGAATTCAGTGAATCATCGAATCTTTGAACGCACATTGCACCCCTTGGTATTCCGAGGGGTATGCCCGTTCGAGCGTCATTATAACCATCAAGCCTGGCTTGGTATTGGAGCCCGCCGTCCTGGCGGCTCCCAAACTCAGTGGCGGTGCCGTCTGGCCCTAAGCGTAGTAATCTTTCTCGCTACAGGACCTGCTGGTGATTTGCCATCAACCCCAACTTCTTAAGGTTGACCTCGGATCAGGTAGGGATACCCGCTGAACTTAA	AB089664	SH207166.06FU				Fungi	Ascomycota	Leotiomycetes	Helotiales			JQ715705	Rhizoscyphus_sp_GW3_18
GL48658	ID03IXK02JJTFO	CTTTGAACGCACATTGCGCCCCTTGGTATTCCGGGGGGCATGCCTGTTCGAGCGTCATTATAACCCTCAAGCCTAGCTTGGTGTTGGAGCCTGCCTCTGGGCAGCTCTTAAAATCAGTGGCGGTGCCGTCTGGCTCTAAGCGTAGTAATTTTTCTCGCTACAGGGTCCTGACGGTTGCTTGCCAACAACCCCAAATTTTCTATGGTTGACCTCGGATCAGGTAGGGATGCCCGCTGAACTTAA	EU326174	SH222542.06FU				Fungi	Ascomycota	Leotiomycetes	Helotiales			JN104524	fungal_sp_CZ_2011c
GL48693	ID03IXK02HUUT6	TGCAGAATTCAGTGAATCATCGAATCTTTGAACGCACATTGCGCCCCTTGGTATTCCGGGGGGCATGCCTGTTCGAGCGTCATTACAACCCTCAAGCTCTGCTTGGTCGTGGGCTCCGCCGATCGACGGGCCTTAAAACTAGTGGCGGTGCCGTCGAGGCCCTGAGCGCAGTAAATATCCTCGCTATAGGGACCCGACGGACGCTAGCCATCAACCCCCACTTTCTAAGTTTGACCTCGGATCAGGTAGGGATACCCGCTGAACTTAA	HM069448	SH209317.06FU				Fungi	Ascomycota	Leotiomycetes	Helotiales			AM260896	uncultured_fungus
GL48720	ID03IXK02GA909	CTAGACTCGTCATCGATGAAGAACGCTGCGAAATGCGATAAGTAATGTGAATTGCAGAATTCAGTGAATCATCGAATCTTTGAACGCACATTGCGCCCTCTGGTATTCCGGGGGGCATGCCTGTTCGAGCGTCATTACAACCCTCAAGCTCTGCTTGGTATTAGGCCTCACCTATTAGGCGGGCCATAAAATCAGTGGCGGTGCCATTCGGCTTCAAGCATAGTAATACTTCTGCTTAGGAGACTGCGTGTTACCTGCTAATAACCCCAATATTTTAAAAGGTTGACCTCGGATCAGGTAGGGATACCCGCTGAACTTAA	AY805602	SH209228.06FU				Fungi	Ascomycota	Leotiomycetes	Helotiales			JF449673	uncultured_Leotiomycetes
GL49106	ID03IXK02HV1RI	CTAGACTCGTCATCGATGAAGAACGCAGCGAAATGCGATAAGTAATGTGAATTGCAGAATTCAGTGAATCATCGAATCTTTGAACGCACATTGCGCCCCTTGGTACTCCGAGGGGCATGCCTGTCCGAGCGTCATGAGACCAATCAAGCCTGGCTTGGTATTAGGCTACGCCAGTGATGGCGGGCCTCAAATCTAGTGGCGGCGCCGTGGGGTTCCGAGCGTAGTAACACCTCTCGCTACGGGCCTTGCGATCGCCGACCAAGAACCCCAACTCTTCGGGTTGACCTCGGATCAGGTAGGAGTACCCGCTGAACTTAA	FN995636	SH241158.06FU				Fungi	Ascomycota	Leotiomycetes	Helotiales			FJ553094	uncultured_Dermateaceae
GL50354	ID1YYUI01EBX9G	CTAGACTCGTCACCGATGAAGAACGCAGCGAAATGCGATAAGTAATGTGAATTGCAGAATTCAGTGAATCATCGAATCTTTGAACGCACATTGCGCCCTCTGGTATTCCGGGGGGCATGCCTGTTCGAGCGTCATTATGACCAATCACGCAAGTGGTATTGGGGCTTGCCAGCTGGCATCCCTTAAAACTAGTGGCAGTGCTATAGGCTCTCAGCGCAGTAATTATTTCGCTCTTGAGTCCTAGACACACCCGCCAAAACCCCAACTTTCTTAGGTTGACCTCGGATCAGGTAGGGATACCCGCTGAACTTAA	DQ914728	SH230019.06FU				Fungi	Ascomycota	Leotiomycetes	Helotiales			EF521221	uncultured_fungus
GL44462	IJOVCJS01BN3KO	CTAGACTCGTCATCGATGAAGAACGCAGCGAAATGCGATAAGTAATGTGAATTGCAGAATTCAGTGAATCATCGAATCCTTGAACGCACATTGCGCCCTCCGGTATTCCGGGGGGCATGCCTGTTCGAGCGTCATTACAACCCTCAAGCTCTGCTTGGTGTTGAGCCCGCCCCGCTTACCCGGGGCTCGCTTCAAAATCAGTGGCGGCCGCCGTCCGACCTTCAGCGCAGTAATGCTCGTCGCTGTTAGGGAAGGGTGGCAAGCGCCGTCATACAACCCCCACACAAGGTTGACCTCGGATCAGGTAGGTATACCCGCTGAACTTAA	HM240820	SH198385.06FU		Plant pathogen		Fungi	Ascomycota	Leotiomycetes	Rhytismatales	Rhytismataceae	Lophodermium	HM240820	uncultured_Lophodermium
GL47742	IJOVCJS01ECHXS	CTAGACTCGGCATCGATGAAGAACGCAGCGAAATGCGATAAGTAATGTGAATTGCAGAATTCAGTGAATCATCGAATCTTTGAACGCACATTGCGCCCTCTGGTATTCCGGGGGGCATGCCTGTTCGAGCGTCATTACAACCCTCAAGCTCCGCTTGGTGTTGGGCTCGCCATCTAGGGCTTGCCTCAAAATCAGTGGCGGCCACAGCCCGACCTCTAGCGCAGTACTACTCGTCGCTGGAAGGAGAGGCCTAGGCGCTATGACAACCCCCTTTTTTACAAGGTTGACCTCGGATCAGGTAGGGATACCCGCTGAACTTAA	AY775693	SH198380.06FU		Plant pathogen		Fungi	Ascomycota	Leotiomycetes	Rhytismatales	Rhytismataceae	Lophodermium	HM240824	uncultured_Lophodermium
GL48620	ID1YYUI01BP7PJ	CTAGACTCGTCATCGATGAAGAACGTAGCGAAATGCGATAATTAATGTGAATTGCAGACTCAGTGAATCATCGAATCTTTGAACGCACATTGCGCCCTCTGGCATTCCGGAGGGCATGCCTGTTCGAGCGTCATTACAACCCTCAAGCACTGCTTGGTGTTGGGCTCGCCCTGTAGGGCCTGCCTCAAAGTCAGTGGCGGCACCGTCTGACCCTAAGCGTAGTAATACTCGCCGCTTGTGGACTCAGCGCGTGGCCTGCCAGCCAACCCCCACCATCAAGGTTGACCTCGGATCAGGTAGGGATACCCGCTGAACTTAA	EF592088	SH196475.06FU		Plant pathogen		Fungi	Ascomycota	Leotiomycetes	Rhytismatales	Rhytismataceae	Lophodermium	FR837918	Lophodermium_piceae
GL47842	IGJRWKL02JZBGR	CTAGACTCGTCATCGATGAAGAACGCAGCGAAATGCGATAAGTAATGTGAATTGCAGAATTCAGTGAATCATCGAATCTTTGAACGCACATTGCGCCCTCTGGTATTCCGGGGGGCATGCCTGTTCGAGCGTCATTACAACCCTCAAGCTCAGCTTGGTTATGGGAGCCACCGGCACGGTGCTCCTCAAAGTCAGTGGCGGCGCCTTCCGGCTTCAAGCGTAGTAATTATCCTCGCTCTGGACGTCTGGAGGCTGCTCGCCAGCAACCCTCACTTTTATAAGGTTGACCTCGGATCAGGTAGGGATACCCGCTGAACTTAA	AY843053	SH222313.06FU				Fungi	Ascomycota	Leotiomycetes	Rhytismatales			GQ153126	Leotiomycetes_sp_11160
GL39711	IGJRWKL02FH7BT	CTAGACTCGTCAACGATGAAGAACGCAGCGAAATGCGATAAGTAATGTGAATTGCAGAATTCAGTGAATCATCGAATCTTTGAACGCACATTGCGCCCTCTGGTATTCCGGGGGGCATGCCTGTTCGAGCGTCATTACAACCCTCAAGCTTTGCTTGGTATTGGACATTGCCAGTTTCTGGCAGGTCTTAAAATCAGTGGCGGTGCCATTTGGCTTCAAGCGTAGTAATTCTTCTCGCTTTGGAGATCCAAGTGGTTACTTGCCAATAACCCCCAATTTTTTCAGGTTGACCTCGGATCAGGTAGGGATACCCGCTGAACTTAA	DQ028268	SH195163.06FU		Saprotroph		Fungi	Ascomycota	Leotiomycetes	Thelebolales	Thelebolaceae	Thelebolus	JX852357	Thelebolus_sp_I12F_02287
GL44108	IJOVCJS01BU1JO	CTAGACTCGTCATCGATGAAGAACGCTGCGAAATGCGATAAGTAATGTGAATTGCAGAATTCAGTGAATCATCGAATCTTTGAACGCACATTGCGCCCCTTGGTATTCCGAGGGGCATGCCTGTCCGAGCGTCATACAACCAATCCCCTCGGGGGTATTGGACCCTGCCGGCGACGACCGGTCCTAAATCCAGTGGCGGCATCGCACGCACTCGAGCGTAGTAGTAGCTTTATCTCGCTTGGAGGCGCGTGCGATCTTGACCAGCAAACCTCACATACGTGTTTATAGGTGGACCTCGGATCAGGTAGGAATACCCGCTGAACTTAA	EU686774	SH194708.06FU				Fungi	Ascomycota	Leotiomycetes				GQ411340	Cudoniella_indica
GL47091	IGJRWKL02JXS5O	CTAGACTCGTCATCGATGAAGAACGCTGCGAAATGCGATAAGTAATGTGAATTGCAGAATTCAGTGAATCATCGAATCTTTGAACGCACATTGCGCCCTCTGGTATTCCGGGGGGCATGCCTGTTCGAGCGTCATTACAACCCTCAAGCTCTGCTTGGTATTGGGTCAGCCCTCCGGGGCTCTCCTCAAATTCAGTGGCGGCGTCCATTGGGCTTCAAGCGTAGTAATTCTTCTCGCTTAGGAGTTCCGGTGGAAGCTTGCCAGCAACCCCCAATTTTCTATGGTTGACCTCGGATCAGGTAGGGATACCCGCTGAACTTAA	JF449726	SH222309.06FU				Fungi	Ascomycota	Leotiomycetes				JF449757	uncultured_Pezizomycotina
GL47426	ID1YYUI01A3CVM	CTAGACTCGTCAACGATGAAGAACGCAGCGAAATGCGATAAGTAATGTGAATTGCAGAATTCAGTGAATCATCGAATCTTTGAACGCACATTGCGCCCCTTGGTATTCCGGGGGGCATGCCTGTTCGAGCGTCATTTCAACCCTCAAGCACTGCTTGGTGTTGGGCCTCTTGCCAGCAATGGCAGGCCCTAAAGCTAGTGGCGGCGCCGCTGGGTCCTGAGCGTAGTAATTCTCTCGCTACTGGGCTTCGGCGTGCTCCTGCCAGCAACCCCATCTTTCTATGGTTGACCTCGGATCAGGTAGGGATACCCGCTGAACTTAA	EU098121	SH237444.06FU				Fungi	Ascomycota	Leotiomycetes				FN394702	fungal_endophyte
GL14114	IGJRWKL02GNQCI	CTAGACTCGTCATCGATGAAGAACGTAGCGAAACGCGATAGGTAATGTGAATTGCAGAATTCCGTGAATCATCGAATCTTTGAACGCACATTGCGCCTTCTGGTATTCCGGTAGGCATGTCTGTTTGAGCGTCAGCAAACACCCTCAGCTTGAGTATTTATTTATTCGACGCTGGTCTTGGGCAGCGGATGCCGGTGGTTGATTTATCTCCACCTGCGCCCTCCCTAAACTTGCTGCACGACCGCAAGCCCCTTCTAGCCAGGTCAATGGAGTGGTGTTACAATCTTCCAAAAAGCCTGATGGATAACCGCTTGGTGGCGTTAAACCCAAAAGTCTCCTCACGGAGATCGAAGTTTTGACCTCAGATCAGACAAGGATACCCGCTGAACTTAA	EF635654	SH221211.06FU		Saprotroph		Fungi	Ascomycota	Orbiliomycetes	Orbiliales			EF635664	uncultured_fungus
GL25972	ID1YYUI01AWOUM	CTAGACTCGTCATCGATGAAGAACGTAGCGAAACGCGATAGTTAATGTGAATTGCAGAATTCAGTGAATCATCGAGTCTTTGAACGCACATTGCGCCCATTGGTATTCCGATGGGCACGTCTGTTTGAGCGTCATCGCAACACTTCGGCTTGACTGGCTTTGCGGCCTTTCCTGCCGGTGCTGGGCTTGGTTGCCCCGACTTGCTCGGGAACCGGCTTTAAAGTTGCACGCTCTGCGGACCCTCTTGTCCAGCGAAACATAGTAAAATTACCACATTGTTGAGCTGCGACCGGTTGGGGTTTTCCGCCTGAACAAATCTTTTTTTGAAGTTTGACCTCAGATCAGACGAGGATACCCGCTGAACTTAA	FJ552822	SH232805.06FU		Saprotroph		Fungi	Ascomycota	Orbiliomycetes	Orbiliales			FJ553789	uncultured_Pezizomycotina
GL27330	IGJRWKL02JEYEK	CTAGACTCGTCACCGATGAAGAACGCAGCGAAACGCGATAGTTAATGTGAATTGCAGAATTCAGTGAATCATCGAGTCTTTGAACGCACATTGCGCCTTTTGGTATTCCGAGAGGCACGCCTGTCTGAGCGTCAGCAATACCTTCGGTTTGACGATTTATTGTCTCGCCGGCGTTGGCGGTTTAAGGGGTTAACCCCCCTAATTCCGTTTAAACACTGACAGCGGGGTAAAGTTTAGTAACACCTATCGATTAGTAGAAATATTTATCGTTCAAGGAAGATCTAAACTCCCGCAATACAAAATTTGGGGAAACCCAACACCAATTTTGACCTCAGATCAGACGAGGATACCCGCTGAACTTAA	JX403725	SH238609.06FU		Saprotroph		Fungi	Ascomycota	Orbiliomycetes	Orbiliales			JQ312995	uncultured_fungus
GL22655	IGJRWKL02H228S	CAGACTCGTCATCGATGAAGAACGCTGCGAAATGCGATAAGTAATGTGAATTGCAGAATTCAGTGAATCATCGAATCTTTGAACGCACATTGCGCCCTCTGGTATTCCGGAGGGCATGCCTGTTCGAGCCTCAATGAAACCGCTCCCCTCCTGGCGCTTCTCGGAGCAAAACGGCGGGGGTTCTGGCGGACGCGAACGCCGTCAATGGCTTCTTGCGCCGCTCAAATCGACGGTCTGCAGGCCCCGAGGGCGCACCCGACGTAGTGATAACATTTCTCGTCGACGGCGACCCCGGTGCTCCTGAGACCCTAAGCGTTTCGGCGCCAAACCCAATCGGTTGAGCTCGGATCAGGTAGGGATACCCGCTGAACTTAA	UDB015603	SH240398.06FU		Saprotroph		Fungi	Ascomycota	Pezizomycetes	Pezizales	Discinaceae	Gyromitra	GU373505	Gyromitra_esculenta
GL30034	ID1YYUI01AGV9F	CCCCACTCAAGTATCCTTTTTGTGATGTTTGGATTGCTTTGGAGAGGTAGCTTCTATTACAGAGTCGCCCTTCAGAAATTCATAGGCAGTATGGTTTGCACTTGAACCAGACGTAATAATAATAAAATCGTTTGTTTGGGTAGAATTGTACTTGCCTTAACCCACCCACCCATTAAACTCTGGGTGACCTCAGATCAGGTAGGGATACCCGCTGAACTTAA	AY656939	SH235923.06FU	terfezia-peziza depressa	EcM		Fungi	Ascomycota	Pezizomycetes	Pezizales	Pezizaceae		EF619728	uncultured_Pezizales
GL30889	ID1YYUI01BIOW4	CTAGCTCGTCACCGATGAAGAACGCAGTGAAATGCGATAAGTAATGTGAATTGCAGAATCTCGTGAATCATCGAATCTTTGAACGCACATTGCGCCCTATGGTATTCCGTAGGGCATGCCTGTCTGAGCGTCAGCTCCCCCCCACTCAAGTATCCTTTTGTGACACTTGGATTGCTTTGGAGAGGTGCCTCTTGATAAGAGTCGCCCTCCAGAAATTTATAGGCAGTATGGTTTGCACCTGAACCAGACGTAATAATAATAAAATCGTTTGTTTGGGTATAATTGTGCTTGCCTTAACCCACCCATTTTTACCTTGGGTGACCTCAGATCAGGTAGGGATACCCGCTGAACTTAA	UDB014593	SH235924.06FU	terfezia-peziza depressa	EcM		Fungi	Ascomycota	Pezizomycetes	Pezizales	Pezizaceae		FN669234	Peziza_sp_B276
GL18496	IGJRWKL02F9LV3	CTAGACTCGTCAACGATGAAGAACGCAGCGAAATGCGATAAGTAGTGTGAATTGCAGAATTCAGTGAATCATCGAATCTTTGAACGCACATTGCGCCTTTCGGCATTCCGGAGGGCATGCCTGTTCGAGAGTCATTAACAACCAGTTCAATCCCTCTTAAAAAATATTTGGGGTATTGGTTATTGGTGAATGAGGGGATGCGTGCATCACGTTGAATCACCTCACCACCGAAATTCAGAGGCGGTTTGTCCCCCACGTGTTTGTGGCGTTGTAAAGGCTTACCAGCACTATTCGCTCGCATCGTGGGTGCACTGCTTGCCATTGGAGAAATCCCCATTCATCAAAGGTTGACCTCGGATCAGGTAGGGATACCCGCTGAACTTAA	UDB015480	SH208889.06FU	genea-humaria	EcM		Fungi	Ascomycota	Pezizomycetes	Pezizales	Pyronemataceae	Humaria	UDB015480	Humaria_hemisphaerica
GL31326	ID1YYUI01A2LML	CTAGACTCGTCATCGATGAAGAACGTGGCGAAATGCGATAAGTAGTGTGAATTGCAGAATTCAGTGAATCATCGAATCTTTGAACGCACATTGCGCCTCCTGGTATTCCGGGAGGCATGCCTGTTCGAGCGTCATGAAGACAATTTCAAGCTCTTTTGCTTGGTTTTGAAGGTTGAGTGTTGCGCTTGCGCTCGTTCACCATTGAAATTCACAGGCGGACGGTTTCGTGTTCCTTCTGGCGTTATAGGTTAACTCTCTCGCTTGGATACGTGAACCTGTCCTGCCCCAAAACCCCCAATTAACTTGTGGTTGACCTCGGATCAGGTAGGGATACCCGCTGAACTTAA	JN942772	SH197685.06FU	otidea	EcM		Fungi	Ascomycota	Pezizomycetes	Pezizales	Pyronemataceae	Otidea	UDB018062	Otidea_onotica
GL31577	ID03IXK02G4RD4	CAACTCGTCATCGATGAAGAACGCAGCGAAATGCGATAAGTAGTGTGAATTGCAGAATTCAGTGAATCATCGAATCTTTGAACGCACATTGCGCCTCATGGTATCCCATGGGGCATGCCTTCCGGAGTGTCGGGAAAACCCCCTTCAAGCATTTTTTTGCTTGGTTGTGGAGGCTGAGCGTTGCCTGCGTGCACGTTTGCCTTCGAAATTCATTGGCGGACTGTTTCATGTTCCATTTGGCGTTATAGGATAACTCTTTCGCTTGGACTTATGAGGCTGTTCAGCCCAGAAATAACCCCCCATTATTCCGGAACGACCTCAATTAGGTAAGGATACCCGCTGAACTTAA	EU784388	SH229941.06FU	otidea	EcM		Fungi	Ascomycota	Pezizomycetes	Pezizales	Pyronemataceae	Otidea	FR852315	uncultured_Otidea
GL36378	ID1YYUI01CWO16	CTAGACTCGTCATCGATGAAGAACGCTGCGAAATGCGATAAGTAGTGTGAATTGCAGAATTCAGTGAATCATCGAATCTTTGAACGCACATTGCGCCTTCTGGTATTCCGGGAGGCATGCCTGCTCGAGCGTCATGACGACGATATTTCAAGCTCTTTTTTGCTTGGTTCTGAAGGTCGAGTGTTGCATTCACCTTTGAAATTTACAGGCGGACTGCTTCGTGTTCCTTTTGGCGTTATAGGATAACTCTTTCGCTTGGACTCGTTGACCTGTCCTGCCCTCAAACCCCCAACTATTATGACGTTGACCTCGGCTTGGTAGGGATACCCGCTGAACTTAA	UDB015735	SH216878.06FU	otidea	EcM		Fungi	Ascomycota	Pezizomycetes	Pezizales	Pyronemataceae	Otidea	UDB015735	Otidea_bufonia
GL31333	ID1YYUI01DHN5E	CTAGACTCGTCATCGATGAAGAAAGCAGCGAAATGCGATAAGTAGTGTGAATTGCAGAATTCAGTGAATCATCGAATCTTTGAACGCACATTGCGCCTCCTGGTATTCCGGGAGGCATGCCTGTTCGAGCGTCATTAAAAACCACTCAAGCGATTTTGCTTGGTCTTGGAGGAAGAGCAGCCTTCCGGCAGCTCCCCTCTGAAATACAATGGCGGATGGTCCCTTGAGCCCCGACGTAGTAAGAGCAATCTTTCGTCGGAGATCTTGGACACTCCTGCCCTCAATCCCAAACTTTATTATGGTTGACCTCGGATCAGGTAGGGATACCCGCTGAACTTAG	JQ824118	SH229126.06FU		Saprotroph		Fungi	Ascomycota	Pezizomycetes	Pezizales	Pyronemataceae	Tricharina	JQ824118	Tricharina_gilva
GL39788	ID1YYUI01D9M1Q	CTAGACTCGTCATCGATGAAGAACGCAGCGAAATGCGATAAGTAGTGTGAATTGCAGAATTCAGTGAATCATCGAATCTTTGAACGCACATTGCGCCTCCTGGTATTCCGGGAGGCATGCCTGTTCGAGCGTCATTAAAGACCACTCAAGCGATTTTGCTTGGTATTGGAAGAAGAGTGCCTCTGGCCCTCCCTTCCGAAATCCAATGGCGGAAAGTCTCACGTGCCCCGGCGTAGTAAGTTTATCTTTCGCTTGGACCCTGAGGCGTTCTCGCCCTCAAATACCCAATACTATAGGTTGACCTCGGATCAGGTAGGGATACCCGCTGAACTTAA	GU055642	SH212832.06FU		Saprotroph		Fungi	Ascomycota	Pezizomycetes	Pezizales	Pyronemataceae		JQ761457	Pezizomycetes_sp_genotype_544
GL30902	ID1YYUI01BFEHZ	CTAGACTCGTCACCGATGAAGAACGCAGCGAAATGCGATAAGTAGTGTGAATTGCAGAATTCAGTGAATCATCGAATCTTTGAACGCACATTGCGCCTTCTGGTATTCCGGGAGGCATGCCTGTTCGAGCGTCATCAAACACATCCTCAAGCAAATTTGCTTGGTCTTGGAGGAAGATGTCATCATCTCCTCTCAAATACCTCAGCGGAAACCTCTGCAGGCTCAGGTGTGATAATTACTTTTCACTTGGTGACTGTGGTTACGTTCTTGCTGTCAAGAGCCCCCCAGCTTCTATAAGTTTGACCTCGGATCAGGTAGGGATACCCGCTGAACTTAA	FJ820751	SH195937.06FU		Saprotroph		Fungi	Ascomycota	Pezizomycetes	Pezizales	Sarcosomataceae	Plectania	FJ820751	uncultured_fungus
GL29569	IGJRWKL02F4Q8J	CTAGGACTCGTCACCGATGAAGAACGCAGCGAAATGCGATAAGTAGTGTGAATTGCAGAATTCAGTGAATCATCGAATCTTTGAACGCACATTGCGCCTTCTGGTATTCCGGGAGGCATGCCTGTTCGAGCGTCATCAAACACATCCTCAAGCATGCTTTGCATTGCTTGGTCTTGGGGGAAGATGTCCGCATCTCCCCTGAAATCCCTCAGCGGAAAAGCCATCTCTGTCCACAGGTGTGATAATTACTGTTCGCCTGGTGACGTGGAAGGTGTTCCTGCTGTCAATGGCCCCCCAGCTTTCTCATGAGTTTGACCTCGGATCAGGTAGGGATACCCGCTGAACTTAA	EU834222	SH241394.06FU		Saprotroph		Fungi	Ascomycota	Pezizomycetes	Pezizales	Sarcosomataceae	Urnula	AF485076	Strumella_coryneoidea
GL18827	IGJRWKL02IU7CI	CTAGACTCGTCAACGATGAAGAACGCAGCGAAATGCGATAAGTAGTGTGAATTGCAGAATTCAGTGAATCATCGAATCTTTGAACGCACATTGCGCCTTCTGGTAATCCGGGAGGCATGCCTGTTCGAGCGTCATGAAAGCAAATCCTCAAGCATTTATGCTTGGTCTTGGGGCTACCAGGAATCCTCAGGCTGTACTTGGTGCGTCTGAGGCCTTGCGCCCTGTAATCCAATGAGCGGAAACCACTGGTGGTCAGTAAAATCAGGTGTGATAAATTCATTTTCCCTTGATGACTCTGGTGACGGTTCCTGCCACATGTACGCTAGCCCCCCAGCTATCATTCGCGTTGACCTCGGATCAGGTAGGGATACCCGCTGAACTTAA	JX669810	SH237151.06FU		Saprotroph		Fungi	Ascomycota	Pezizomycetes				JX298901	fungal_sp_M28_XS_2012
GL24083	IGJRWKL02HSUAA	CTAGACTCGTCACCGATGAAGAACGCAGCGAAATGCGATAAGTAGTGTGAATTGCAGAATTCAGTGAGTCATCGAATCTTTGAACGCACATTGCGCCTTCTGGTAATCCGGGAGGCATGCCTGTTCGAGCGTCATGAAAGCAACTCCTCAAGCATGTTATGCTTGGTCTTGGGGCCATCGGGAATCCTCCGGCTCAGCCTGAGGCCCGTGCCCTGTAATCCAACGTGCGGAAACCACGGCGGTCAGTACTCAGGTGTGATAAATTCGTTTTCCCTTGATGACTGCAGTGATGATTCCGGCCAGTAACCTGCTAGCCCCCGAGCTATCATTTCGCGTTGACCTCGGATCAGGTAGGGATACCCGCTGAACTTAA	JX669810	SH237151.06FU		Saprotroph		Fungi	Ascomycota	Pezizomycetes				JX298901	fungal_sp_M28_XS_2012
GL29662	ID1YYUI01EHWUD	CTAGACTCGTCTACCGATGAAGAACGCAGCGAAATGCGATAAGTAGTGTGAATTGCAGAATTCAGTGAATCATCGAATCTTTGAACGCACATTGCGCCTCCTGGTATTCCGGGAGGCATGCCTGTTCGAGCGTCATCAAACACATCCTCAAGCATCTTTGCTTGGTTGTGGAGGAAGATGGTCTGTTGACCATCCCCTCTAGAATTCCTCAGCGGAGACCACAGCAGACTCAGGTGTGATAATACTACCTCGCTTGAGTGCTATTGTGGGCTTCCGCTGGAAACCAGCCCCCAGCTATTACCATGTTTGACCTCGGATCAGGTAGGGATACCCGCTGAACTTAA	JQ758696	SH234386.06FU		Saprotroph		Fungi	Ascomycota	Pezizomycetes				JQ759341	Pezizomycetes_sp_genotype_53
GL29770	ID1YYUI01AEYPJ	CTAGACTCGTCAACGATGAAGAACGCAGCGAAATGCGATAAGTAGTGTGAATTGCAGAATTCAGTGAATCATCGAATCTTTGAACGCACATTGCGCCTCCTGGTATTCCGGGAGGCATGCCTGTTCGAGCGTCATTAAAATCACTCAAGCTTAGGTTTACCTATTGCTTGGTCTTGGAGATGGAAGCCGAGTAATCGGAATCCTCTTCGAAATCCAATGGCGAAGACCCTTGCTCTCCCAAGTGTAGTAATTACTTATGTCACTGAAGAAAGCGAGAAATCTTCCGCCGTAACCCCCATATTTTCTATGATTGACCTCGGATCAGGTAGGGATACCCGCTGAACTTAA	JX978249	SH210651.06FU		Saprotroph		Fungi	Ascomycota	Pezizomycetes				GQ153164	Pezizomycetes_sp_11217B
GL31850	ID03IXK02H9G0Z	CTAGACTCGTCACCGATGAAGAACGCAGCGAAATGCGATAAGTAGTGTGAATTGCAGAATTCAGTGAATCATCGAATCTTTGAACGCACATTGCGCCTCCTGGTATTCCGGGAGGCATGCCTGTTCGAGCGTCATTAAAATCACTCAAGCTTAGGTTTGCCTATTGCTTGGTCTTGAAGATGGAAGCTAAGTAATTAGAATCCTCTTCGAAATCCAATGGCGAAGACCCTTGCTCTCCCAAGTGTAGTAATAACTTATTCACTGAAGGAAGCGAGTAATCTTCCGCCGTAACCTCCATATTTTTCTATGATTGACCTCGGATCAGGTAGGGATACCCGCTGAACTTAA	JX978249	SH210651.06FU		Saprotroph		Fungi	Ascomycota	Pezizomycetes				HQ829414	Pezizomycetes_sp_hotanF1
GL33460	ID03IXK02FOE79	CTAGACTCGTCATCGATGAAGAACGCAGCGAAATGCGATAAGTAGTGTGAATTGCAGAATTCAGTGAATCATCGAATCTTTGAACGCACATTGCGCCTCCTGGTATTCCGGGAGGCATGCCTGTTCGAGCGTCATTAAAACCCACTCAGATTCCCTTTAGGGGGCTTTCTGGTCTTGGGGGAGCAGCGGCAACGCGAGCCCCCCCGAAATCCATCGTGCGGAAAGGCCCGGTGGCCCAGGCGTAGTATTAACATCCTCTCGTCTGGTGTCTGCCGAGCGTTCCTGCCGTCAACCCCCCCACGACTTCAATGACTTGGCCTCGAATCAGGTAGGGATACCCGCTGAACTTAA	HM122969	SH212258.06FU		Saprotroph		Fungi	Ascomycota	Pezizomycetes				JQ760883	Pezizomycetes_sp_genotype_454
GL36905	ID03IXK02HGOSC	CTAGACTCGTCAACGATGAAGAACGCAGCGAAATGCGATAAGTAGTGTGAATTGCAGAATTCAGTGAATCATCGAATCTTTGAACGCACATTGCGCCTCCTGGTATTCCGGGAGGCATGCCTGTTCGAGCGTCATAAACAACATCTCAGGCAATTTTGCTTGGTTGTGGAGGATGATGGTCCCCAGATCATCCCCTCTGGAAGTCCTCAGCGGAAACCTAGATAGCCTCAGGTGTGATAATATTTCTTCGCTTGATGGTTAACTGGTGCTCCTGCTGTAAACCAGCCCCCAGCTATTTCATGTTTGACCTCGGATCAGGTAGGGATACCCGCTGAACTTAA	AY465507	SH234389.06FU		Saprotroph		Fungi	Ascomycota	Pezizomycetes				AY566887	foliar_endophyte_of_Picea_glauca_sp_M6
GL37382	ID1YYUI02HMX13	CTAGACTCGTCATCGATGAAGAACGCAGCGAAATGCGATAAGTAGTGTGAATTGCAGAATTCAGTGAATCATCGAATCTTTGAACGCACATTGCGCCTTCTGGTAATCCGGGAGGCATGCCTGTTCGAGCGTCATAAAGCACACCCTCAAGCATCTAGGCTTGGTCTTGGAGGAAGATGCTTGCATCTCCTCTGAAATTCCTCAGCGGATACTTCTGTGGTCCCAGGTGTGATATATCATTTTCACTTGATGGCTACAGGTATGCTCTTGCTGTCAAATGCCCCCCCAGCTTTGTATACGTTTGACCTCGAATCAGGTAGGGATACCCGCTGAACTTAA	JQ761310	SH239740.06FU		Saprotroph		Fungi	Ascomycota	Pezizomycetes				JQ761605	Pezizomycetes_sp_genotype_513
GL38204	ID1YYUI01BTB4H	CTAGACTCGTCATCCGATGAAGAACGTAGCGAAATGCGATAAGTAGTGTGAATTGCAGAAACTAGTGAATCATTGAATCTTTGAACGCACATTGCGCCTCCTGGTATTCCGGGAGGCATGCCTGTTCGAGCGTCATTAAAAGCCACTCAAGCTCTTTTGCTTGGTCATGGAAGAAGAGTTTGCTTGCAATCTCTCCTCCGAAATTCAAAGGCGGAAAGTCTCAGAGCCCCGGCGTAGTAATAATATTTCGCTTGGAACTTGAGATGATCCTGCCCTTAACCCCCAATTTATCTAGGTTGACCTCGGATCAGGTAGGGATACCCGCTGAACTTAA	AM260886	SH212836.06FU		Saprotroph		Fungi	Ascomycota	Pezizomycetes				AM260886	uncultured_fungus
GL04480	ID1YYUI01A3EXL	AAGAAGTTTTTTTAATTAAGATTCTTCGTTTGGTCTTGAGTAGTATTCTGTTTTACGACGGGATTCTGTTTGAAATATATTAGTAGAGCATGCTTAGAGGAAAGTTCGAAAGCATTATGATAAACCTTTTATTGGTGTATTAAGATTTATTCTAAATCACTATAATGGTATATCTAGTTTTAGATCTTGCATATCTTCTATTGAAAGCTCTTCTGTAATCTGCTTTTGTTTATAGATTTATCTGTAAGCGAAATCAATTTCTATATTTTTGACCTCAAATCAGGCAGGAGTACCCGCTGAACTTAA	HM069473	SH221678.06FU		Saprotroph	Yeast	Fungi	Ascomycota	Saccharomycetes	Saccharomycetales	Lipomycetaceae	Lipomyces	HM069473	uncultured_fungus
GL25744	ID1YYUI02F4HCH	CTAGACTCGTCACCGATGAAGAACGCAGCGAAATGCGATAAGTAATATGAATTGCAGATTTTCGTGAATCATCGAATCTTTGAACGCACATTGCGCCCTCTGGTATTCCAGAGGGCATGCCTGTTTGAGCGTCATTCCTCTCTCAAACCCTCGGGTTTGGTATTGAGTGATACTCTTAGTCGAACTAGGCGTTTGCTTGAAATTTATTGGCATGAGTGATGCTAAAAAGTGCATTCAGGAACTATCAATGTATTAGGTTTATCCAACTCGTTGACAATCCTTGATTGTGAATTTTTAGTGTTAGGCTTTGCCTTATAAAACAACAAACAAGTTTGACCTCAAATCAGGTAGGATTACCCGCTGAACTTAA	FJ873416	SH213726.06FU		Saprotroph	Yeast	Fungi	Ascomycota	Saccharomycetes	Saccharomycetales		Candida	FN868154	Candida_sp_CBS_11774
GL50872	ID03IXK02JLDX4	CTAGACTCGTCATCGATGAAGAACGCAGCGAAATGCGATAAGTAATATGAATTGCAGATATTCGTGAATCATCGAATCTTTGAACGCACATTGCGCCCTTTGGTATTCCAAAGGGCATGCCTGTTTGAGCGTCATTTCTCCCTCAAACCCTCGGGTTTGGTGTTGAGCGATACGCTGGGTTTGCTTGAAAGAAAGGCGGAGTATAAACTAATGGATAGGTTTTTTCCACTCATTGGTACAAACTCCAAAACTTCTTCCAAATTCGACCTCAAATCAGGTAGGACTACCCGCTGAACTTAA	JN675330	SH223248.06FU		Saprotroph	Yeast	Fungi	Ascomycota	Saccharomycetes	Saccharomycetales		Candida	KC422431	Candida_parapsilosis
GL51157	IGJRWKL02IJKX5	CTAGACTCGTCAACGATGAAGAACGCAGCGAAATGCGATACGTAATATGAATTGCAGATTTTCGTGAATCATCGAATCTTTGAACGCACATTGCGCCCTGTGGTATTCCACAGGGCATGCCTGTTTGAGCGTCATTTCTCCCTCAAACCTCTGGTTTGGCGTTGAGTGATACTCGGTTTACTTGAAAAACATGAAAAGCATAACTATTAGGTTTTACCAACTCGTTATACTAATCTACAAGTTTGACCTCAAATCAGGTAGGACTACCCGCTGAACTTAA	KC920876	SH239468.06FU		Saprotroph	Yeast	Fungi	Ascomycota	Saccharomycetes	Saccharomycetales			JF461105	uncultured_fungus
GL38660	IGJRWKL02G8ZI0	CTAGACTCGTCATCGATGAAGAACGCTGCGAAATGCGATAAGTAATGCGAATTGCAGAATTCAGTGAGTCATCGAATCTTTGAACGCACATTGCGCCCGCCAGCATCCTGGCGGGCATGCCTGTTCGAGCGTCATTTCAACCCTCAGGCTCTGCCTGGCGTTGGGGACCTGCGCCTCGCAGCCCCCGAAACACAGCGGCGGTCCCGTCCCGGCACCGAGCGTAGTAGCACATCTCGCTATGGGCGTTCGGGCGGTGGCCTGCCGGAAAACCCCCTATTTTCGTGGTTGACCTCGGATCAGGTAGGAATACCCGCTGAACTTAA	EU076954	SH234443.06FU		Saprotroph		Fungi	Ascomycota	Sordariomycetes	Chaetosphaeriales	Chaetosphaeriaceae	Chaetosphaeria	GQ219819	uncultured_Chaetosphaeria
GL44724	ID1YYUI02HZOXT	TACTCGTCACCGATGAAGAACGCAGCGAAATGCGATAAGTAATGCGAATTGCAGAATTCCGTGAGTCATCGAATCTTTGAACGCACATTGCGCCCGCCAGCATTCTGGCGGGCATGCCTGTTCGAGCGTCATTGCAACCCCTCAGGCCCGGCCTGGCGTTGGAGGACTGCGCGTGCGCAGCCTCCCAAAGCGAGCGGCGGCGGCGCCCCGAGACCGAACGCAGTAGTTACCTCTCGTTCTGGGACCGGGACGTTGTCCTGCCGGAAAACCCCCAACTTTTCGTGGTTGACCTCGAATCAGGTAGGAATACCCGCTGAACTTAA	AY273304	SH234444.06FU		Saprotroph		Fungi	Ascomycota	Sordariomycetes	Chaetosphaeriales	Chaetosphaeriaceae	Chaetosphaeria	JX860443	uncultured_Chaetosphaeria
GL47224	IGJRWKL02HJO21	TCGTCACCGATGAAGAACGCAGCGAAATGCGATAAGTAATGCGAATTGCAGAATTCAGTGAATCATCGAGTTTTTGAACGCACATTGCGCCCGCCAGCATCCTGGCGGGCATGCCTGTTCGAGCGTCATTTCCACCCTCAGGCTCTGCCTGGTGTTGGGGGCCTGCACCCGCAGCCCCTCAAAGACAGCGGCGGTCCCGGCCCCGGCCCCGAGCGTAGTAATATACGTCGCTTCGGGTGCCGGGCGGGCCCCAGCCGTAAGCCTTTATTCTCAATAGGTTGACCTCGGATCAGGTAGGAATACCCGCTGAACTTAA	AF178545	SH208091.06FU		Saprotroph		Fungi	Ascomycota	Sordariomycetes	Chaetosphaeriales	Chaetosphaeriaceae	Chaetosphaeria	AF178552	Chaetosphaeria_myriocarpa
GL23281	IGJRWKL02JS0XR	CTAGACTCGTCACCGATGAAGAACGCAGCGAAATGCGATAAGTAATGCGAATTGCAGAATTCCGTGAGTCATCGAATCTTTGAACGCACATTGCGCCCGCCAGCATTCTGGCGGGCATGCCTGTTCGAGCGTCATTGCAACCCTCAGGCCCTGCCTGGCGTTGGAGGACTGCGCTGCAGCCTCCTAAAGCAAGCGGCGGCGGCGCCCCAAAACCGAACGCAGTAATACATCTCGTTCTGGGTCTGGGACGTTGTCCGGCCGGAAAACCCCCTCTTTTACGTGGTTGACCTCGAATCAGGTAGGAATACCCGCTGAACTTAA	UDB004172	SH234450.06FU		Saprotroph		Fungi	Ascomycota	Sordariomycetes	Chaetosphaeriales	Chaetosphaeriaceae	Chloridium	FN298753	uncultured_fungus
GL47505	ID03IXK02F6LAA	CTAGACTCGTCATCGATGAAGAACGTGGCGAAATGCGATAAGTAATGCGAATTGCAGAATTCCGTGAGTCATCGAATCTTTGAACGCACATTGCGCCCGCCAGCATTCTGGCGGGCATGCCTGTTACGAGCGTCATTGCAACCCTCAGGCCCTGCCTGGCGTTGGAGGACTGCGCTGCAGCCTCCCAAAGCAAGCGGCGGCGGCGCCCCAAAACCGAACGCAGTAATACATCTCGTTCTGGGTCTGGGACGTTGTCCGGCCGGAAAACCCCCCTCTTTTACGTGGTTGACCTCGAATCAGGTAGGAATACCCGCTGAACTTAA	UDB004172	SH234450.06FU		Saprotroph		Fungi	Ascomycota	Sordariomycetes	Chaetosphaeriales	Chaetosphaeriaceae	Chloridium	FN298753	uncultured_fungus
GL45247	ID1YYUI01CI3QC	CTAGACTCGTCATCGATGAAGAACGCTGCGAAATGCGATAAGTAATGCGAATTGCAGAATTCCGTGAGTCATCGAATCTTTGAACGCACATTGCGCCCGCCAGCATTCTGGCGGGCATGCCTGTTCGAGCGTCATTTCAACCCTCAGGCCCTGCCTGGCGTTGGAGGACTGCGCACCGCAGCCTCCCAAAGCGAGCGGCGGCGGCGCCCCGAAACCGAACGCAGTAGTTTTCTCTCGTTCTGGGTCCGGGTCGTTGTCCTGCCGGAAAACCCCCATCTATTCAATGGTTGACCTCGAATCAGGTAGGAATACCCGCTGAACTTAA	HQ611333	SH234442.06FU		Saprotroph		Fungi	Ascomycota	Sordariomycetes	Chaetosphaeriales			GQ996173	fungal_sp_mh27463
GL18551	ID1YYUI02IF5WS	GACCACGCCACGTATCTAGACTCGTCATCGATGAAGAACGCAGCGAAATGCGATAAGTAATGTGAATTGCAGAATTCAGTGAATCATCGAATCTTTGAACGCACATTGCGCCCTCTGGTATTCCGGGGGGCATGCCTGTTCGAGCGTCATTACAACCCTCAAGCTCTGCTTGGTATTGGGCTACACCCGACTGGGTGGGCCTTAAAATCAGTGGCGGTGCCATCTGGCTCTAAGCGTAGTAATTCTTCTCGCTCTGGAGATCTAGGTGTTTGCTTGCCAGCAACCCCCAATTTATCAAAGGTTGACCTCGGATCAGGTAGGGATACCCGCTGAACTTAA	AY354278	SH209183.06FU		Saprotroph		Fungi	Ascomycota	Sordariomycetes	Coniochaetales	Coniochaetaceae	Lecythophora	KC180730	Lecythophora_cf_mutabilis_GMU_LL_02_B8
GL38104	IGJRWKL02HRX7T	CTAGACTCGTCACCGATGAAGAACGCAGCGAAATGCGATAAGTAATGTGAATTGCAGAATTCAGTGAATCATCGAATCTTTGAACGCACATTGCGCCCGCTAGTACTCTAGCGGGCATGCCTGTTCGAGCGTCATTTCAACCCTCAAGCCCTGCTTGGTGTTGGGGCCCTACGGCTGCCGTAGGCCCTGAAAGGAAGTGGCGGGCTCGCTACAACTCCGAGCGTAGTAATTCATTATCTCGCTATGGACGTTGCGGCGGTGCTCCTGCCGTTAAAGACCCCATCTTTAACCAAGGTTGACCTCGGATCAGGTAGGAATACCCGCTGAACTTAA	FJ235955	SH226439.06FU		Saprotroph		Fungi	Ascomycota	Sordariomycetes	Coniochaetales	Coniochaetaceae	Lecythophora	KC254056	Lecythophora_sp_UOA/HCPF_ENV57B
GL41408	IGJRWKL02JR3V3	CTGACTCGTCTCGATGAAGAACGTGGCGAAATGCGATAAGTAATGTGAATTGCAGAATTCAGTGAATCATCGAATCTTTGAACGCACATTGCGCCCGCTAGTATTCTAGCGGGCATGCCTGTTCGAGCGTCATTTCAACCCTCAAGCCCTGCTTGGTGTTGGGGTCCTACGGCTGCCGTAGGCCCTGAAAGAAAGTGGCGGGCTCGCTACAACTCCGAGCGTAGTAGAAATACACCTCGCTAGGGAAGAGTAGTGTGCTCCTGCCGGTAAAGCCCCAAAACTTTAACCCAGGTTGACCTCGGATCAGGTAGGAATACCCGCTGAACTTAA	AY805568	SH226439.06FU		Saprotroph		Fungi	Ascomycota	Sordariomycetes	Coniochaetales	Coniochaetaceae		JQ346933	uncultured_Lecythophora
GL44698	ID1YYUI01BUWC4	CTAGACTCGTCATCGATGAAGAACGCTGCAAAATGCGATAAGTAGTGTGAATTGCAGAATTCAGTGAATCATCGAATCTTTGAACGCACATTGCGCCCTTTGGTATTCCTTAGGGCATGCCTGTTCGAGCGTCATTTACACCCTCAAGCACAGCTTGGTGTTGGGCGTCTGTCCCGCTTCGGCGCGGACTCGCCTCAAAACGATTGGCAGCCACTTCAGCGGCTTTGAGCGCAGCAGAATTGCGTCTCTCGTCGCGGCGGGTGGCATCCAGTAAGCAACATTTATATCTTGACCTCGGATCAGGTAGGGATACCCGCTGAACTTAA	AF383957	SH215422.06FU		Plant pathogen		Fungi	Ascomycota	Sordariomycetes	Diaporthales	Diaporthaceae	Diaporthe	JF907984	Diaporthe_eres
GL39267	ID1YYUI01D2XI2	CTAGACTCGTCACCGATGAAGAACGCAGCGAAATGCGATAAGTAATGTGAATTGCAGAATTCAGTGAATCATCGAATCTTTGAACGCACATTGCGCCCGGTGGTATTCCACCGGGCATGCCTGTTCGAGCGTCATTTCAACCCTCAAAAGCTTGCTTTTGGTGTTGGAGGAATACCTGTGAAAGGGTACCCTCTGAAATTTAGTGGCGGGCTCGCTAGAATTTTGAGCGTAGTAATTTTACCTCGTTTTTAAAGACTAGTGGGACTTCTTGCCGTAAAACCCCCCAACTTTCTGAAATTTGACCTCGGATCAGGTAGGAATACCCGCTGAACTTAA	AY163800	SH226093.06FU		Plant pathogen		Fungi	Ascomycota	Sordariomycetes	Diaporthales	Gnomoniaceae	Ophiognomonia	AM901951	uncultured_Ascomycota
GL36227	ID1YYUI02JESGL	CTAGACTCGTCATCGATGAAGAACGCTGCGAAATGCGATAAGTAATGTGAATTGCAGAATTCAGTGAATCATCGAATCTTTGAACGCACATTGCGCCCGCCAGTATTCTGGCGGGCATGCCTGTCCGAGCGTCATTTCAACCCTCAGGCCCTGGTTGCCTGGTGTTGGGGCGCCGCGCACCCCTAGCGGGCGCGGGCCCCGAAAGTCAGTGGCGGGCTCGCCAGGACTCCGAGCGCAGTAATATTGCCTCGCTGCGGAGCGCCTGGTGGGTTACCCAGCCGTAAAACACCCCAAATTCTAAAGGTTGACCTCGGATCAGGTAGGAATACCCGCTGAACTTAA	EU128050	SH213654.06FU		Plant pathogen		Fungi	Ascomycota	Sordariomycetes	Diaporthales	Togniniaceae	Phaeoacremonium	JQ760525	Sordariomycetes_sp_genotype_405
GL32400	IGJRWKL02JK36X	CTAGACTCGTCATCGATGAAGAACGCTGCGAAATGCGATAAGTAATGTGAATTGCAGAATTCAGTGAATCATCGAATCTTTGAACGCACATTGCGCCCTCTGGTATTCCAGAGGGCATGCCTGTTCGAGCGTCATTTCAACCCTCAAGCCTAGCTTGGTGTTGGGGCATTACCTTCCCTTACGGGAGGGTAAGCCCTGAAATTCAGTGGCGAGCTCGCCAGGACTCCGAGCGTAGTAGTAAAACCCTCGCTTTGGACTGTACTGGCGCGGCCCTGCCGTAAAACCCCCAACTTCTGAAAATTTGACCTCGGATCAGGTAGGAATACCCGCTGAACTTAA	KF293817	SH211782.06FU		Plant pathogen		Fungi	Ascomycota	Sordariomycetes	Diaporthales	Valsaceae	Cytospora	JQ759589	Sordariomycetes_sp_genotype_121
GL35022	IGJRWKL02GDSRS	CTAGACTCGTCAACGATGAAGAACGCAGCGAAATGCGATAAGTAATGTGAATTGCAGAATTCAGTGAATCATCGAATCTTTGAACGCACATTGCGCCCTCTGGTATTCCAGAGGGCATGCCTGTTCGAGCGTCATTTCAACCCTCAAGCCTAGCTTGGTGTTGGGGCATTACCAGACTGTTTTACAGGACGGTAAGCCCTGAAATTTAGTGGCGAGCTCGCCAGGACTCCGAGCGCAGTAGTGTAAACCTCGCTTTGGATCGTACTGGCGCGGCCCTGCCGTAAAACCCCCAACTTCTGAAAATTTGACCTCGGATCAGGTAGGAATACCCGCTGAACTTAA	JX438627	SH211789.06FU		Plant pathogen		Fungi	Ascomycota	Sordariomycetes	Diaporthales	Valsaceae	Valsa	KC506343	fungal_sp_AM2013
GL34913	ID1YYUI02HK811	TGGCCTGGTGTTGGGGACCGGCGACCTCGCCCGGGGGAACACCCCCGGCGCGTCCGCCGCCCCCGAAATGAATTGGCGGCCCCGTCGCGGCCTCCTCTGCGTAGTAGCACAACCTCGCAGCGGGAGCGCGACGCGGCCACTGCCGTAAAACGCCCAACTTTTTTTTTTAGAGTTGACCTCGGATCAGGTAGGAATACCCGCTGAACTTAA	KC180703	SH219443.06FU		Animal parasite		Fungi	Ascomycota	Sordariomycetes	Hypocreales	Clavicipitaceae	Pochonia	AB378554	Pochonia_bulbillosa
GL37964	ID1YYUI02FTJUH	GCGGCTTGGTGTTGGGGACCGGCGAGCGAAGCCCCTCCGGGGGGTTCACGCCGCCCCCGAAATGAATTGGCGGTCTCGTCGCGGCCTCCTCTGCGTAGTAGCACAACCTCGCAACAGGAGCGCGGCGCGGCCACTGCCGTAAAACGCCCAAACTTTTTTTAGAGTTGACCTCGAATCAGGTAGGAATACCCGCTGAACTTAA	DQ516081	SH228971.06FU		Animal parasite		Fungi	Ascomycota	Sordariomycetes	Hypocreales	Clavicipitaceae	Pochonia	DQ516081	Pochonia_sp_CBS_64685
GL38541	ID1YYUI01BBMHR	CTAGACTCGTCAACGATGAAGAACGCAGCGAAATGCGATAAGTAATGTGAATTGCAGAATCCAGTGAATCATCGAATCTTTGAACGCACATTGCGCCCGCCAGCATTCTGGCGGGCATGCCTGTTCGAGCGTCATTTCAACCCTCGACCTCCCCTTGGGGAGGTCGGCGTTGGGGACCGGCAGCACACCGCCGGCCCTGAAATGGAGTGGCGGCCCGTCCGCGGCGACCTCTGCGTAGTAATACAGCTCGCACCGGAACCCCGACGCGGCCACGCCGTAAAACACCCAACTTCTGAACGTTGACCTCGAATCAGGTAGGACTACCCGCTGAACTTAA	JQ266164	SH196288.06FU		Animal parasite		Fungi	Ascomycota	Sordariomycetes	Hypocreales	Cordycipitaceae	Beauveria	JX406519	Beauveria_bassiana
GL36710	IGJRWKL02F2UTT	CTAGACTCGTCAACGATGAAGAACGCAGCGAAATGCGATAAGTAATGTGAATTGCAGAATTCAGTGAATCATCGAATCTTTGAACGCACATTGCGCCCGGGAGCATTCTCCCGGGCATGCCTGTTCGAGCGTCATTTCAACCCTCGATTTCCCTTTGGGGAAGTCGGCCGTTGGAGATCGGCAGCACTGCCGGCTCCCAAATACAGTGGCGACCCGCCGCGGGGACCCCTGCGTAGTAACTTACACTCGCACCGGAAACCAGACGTGTCACGCCGTAAAACCCCCAACTTTCTGAACGTTGACCTCGGATCAGGTAGGAATACCCGCTGAACTTAA	KC007329	SH196312.06FU		Animal parasite		Fungi	Ascomycota	Sordariomycetes	Hypocreales	Cordycipitaceae	Lecanicillium	KC007329	Lecanicillium_sp_O_3_BESC_246b
GL41620	ID1YYUI01B2HA3	CTAGACTCGTCAACGATGAAGAACGCAGCGAAATGCGATAAGTAATGTGAATTGCAGAATTCAGTGAATCATCGAATCTTTGAACGCACATTGCGCCCGCCAGCATTCTGGCGGGCATGCCTGTTCGAGCGTCATTTCAACCCTCAAGCTCTGCTTGGTGTTGGGGCTCTACGGTTGACGTAGGCCCTTAAAGGTAGTGGCGGACCCTCTCGGAGCCTCCTTTGCGTAGTAACATTTCGTCTCGCATTGGGATTCGGAGGGACTCTAGCCGTAAAACCCCCAATTTTACTAAGGTTGACCTCGGATCAGGTAGGAATACCCGCTGAACTTAA	JF796251	SH233072.06FU		Plant pathogen		Fungi	Ascomycota	Sordariomycetes	Hypocreales	Glomerellaceae	Colletotrichum	KC335522	Colletotrichum_capsici
GL29939	IGJRWKL02FJ3PM	CTAGACTCGTCATCGATGAAGAACGCTGCGAAATGCGATAAGTAATGTGAATTGCAGAATTCAGTGAATCATCGAATCTTTGAACGCACATTGCGCCCGCCAGTATTCTGGCGGGCATGCCTGTCCGAGCGTCATTTCAACCCTCGAACCCCTCCGGGGGTACGGCGTTGGGGATCGGCCCTTTACGGGGCCGGCCCCGAAATACAGTGGCGGTCTCGCCGCAGCCTCTCCTGCGCAGTAGTTTGCACACTCGCATCGGGAGCGCGGCGCGTCCACGTCCGTAAAACACCCAACTTTCTGAAATGTTGACCTCGGATCAGGTAGGAATACCCGCTGAACTTAA	FJ612748	SH239089.06FU		Mycoparasite		Fungi	Ascomycota	Sordariomycetes	Hypocreales	Hypocreaceae	Hypocrea	UDB011029	Hypocrea_avellanea
GL32622	ID03IXK02G8RNE	TTTCAACCCTCGAACCCCTCCGGGGGGTCGGTGTTGTGGATCGGCCCTCCCTTAGCGGGTGGCCGTCTCCGAAATACAGTGGCGGTCTCGCCGCAGCCTCTCCTGCGCAGTAGTTTGCACACTCGCATCGGGAGCGCGGCGCGTCCACAGCCGTTAAAACACCCAACTTTCTGAAATGTTGACCTCGGATCAGGTAGGAATACCCGCTGAACTTAA	KC800597	SH201968.06FU		Mycoparasite		Fungi	Ascomycota	Sordariomycetes	Hypocreales	Hypocreaceae	Hypocrea	EF191298	Hypocrea_lixii
GL32985	ID1YYUI01DIFT5	CTAGAATCGTCAACGATGAAGAACGCAGCGAAATGCGATAAGTAATGTGAATTGCAGAATTCAGTGAATCATCGAATCTTTGAACGCACATTGCGCCCGCCAGTATTCTGGCGGGCATGCCTGTCCGAGCGTCATTTCAACCCTCGAACCCCTCCTGGGGGTCGGCGTTGGGGACTTCGGGAACCCCTAAGACGGGATCCCGGCCCCGAAATACAGTGGCGGTCTCGCCGCAGCCTCTCATGCGCAGTAGTTTGCACAACTCGCACCGGGAGCGCGGCGCGTCCACGTCCGTAAAACACCCAACTTCTGAAATGTTGACCTCGGATCAGGTAGGAATACCCGCTGAACTTAA	JF831494	SH222750.06FU		Mycoparasite		Fungi	Ascomycota	Sordariomycetes	Hypocreales	Hypocreaceae	Hypocrea	X93980	Hypocrea_rufa
GL34135	ID1YYUI01D1XUU	CTAGACTCGTCAACGATGAAGAACGCAGCGAAATGCGATAAGTAATGTGAATTGCAGAATTCAGTGAATCATCGAATCTTTGAACGCACATTGCGCCCGCCAGCACTCTGGCGGGCATGCCTGTTCGAGCGTCATTTCAACCCTCAAGCCCCCCAGGGGGCCTGGTGTTGGGGACCGGCCCCGCCTCGTCGCGGGTCGCCGCCCCCTAAAATCAGTGGCGGTCCTGCCGCAGCCTCCTCTGCGTAGTAGCTTATGAAACCTCGCACCGGAGCGCGGCTCGGCCACGCCGTTAAACCCCAACTTCTGAAAGTTTGACCTCGGATCAGGTAGGAATACCCGCTGAACTTAA	AF054846	SH230828.06FU		Mycoparasite		Fungi	Ascomycota	Sordariomycetes	Hypocreales	Hypocreaceae	Hypomyces	JF300547	uncultured_fungus|Hypomyces_chrysospermus|
GL29384	ID1YYUI02IV1F9	CTAGACTCGTCATCGATGAAGAACGCTGCGAAATGCGATAAGTAATGTGAATTGCAGAATTCAGTGAATCATCGAATCTTTGAACGCACATTGCGCCCGCCAGTATTCTGGCGGGCATGCCTGTCCGAGCGTCATTTCAACCCTCGAACCCCTCCGGGGGGTCGGCGTTGGGGATCGGCCCCTCACCGGGCCGCCCCCGAAATACAGTGGCGGTCTCGCCGCAGCCTCTCCTGCGCAGTAGTTTGCACACTCGCACCGGGAGCGCGGCGCGGCCACAGCCGTAAAACACCCCAAACTTCTGAAATGTTGACCTCGGATCAGGTAGGAATACCCGCTGAACTTAA	KF144627	SH240600.06FU		Saprotroph		Fungi	Ascomycota	Sordariomycetes	Hypocreales	Hypocreaceae	Trichoderma	Z95493	Trichoderma_longibrachiatum
GL44293	ID1YYUI01BRP1D	CATCGAATCTTTGAACGCACATTGCGCCCATTAGTATTCTATTGGGCATGCCTGTTCGAGCGTCATTTTGACCACTTAAGCCTAGCTTAGTGTTGGGAATCTACGTTTGTAGTTCCTTAAATCTAGTGGCGGAGCCGCAGTGGCCTCTGAGCGTAGTAATCTTTTCTCGCTTTGGAAGGTTCTGTAGTTTTTGCCGTTAAACCCCCAATTTTTTAAGGTTGACCTCGGATCAGGTAGGAATACCCGCTGAACTTAA	GU174272	SH189862.06FU		Plant pathogen		Fungi	Ascomycota	Sordariomycetes	Hypocreales	Nectriaceae	Cylindrium	HQ022115	uncultured_Cylindrium
GL02088	IGJRWKL02FNCNW	CTAGACTCGTCATCGATGAAGAACGCAGCGAAATGCGATAAGTAATGTGAATTGCAGAATTCAGTGAATCATCGAATCTTTGAACGCACATTGCGCCCGCCAGTATTCTGGCGGGCATGCCTGTTCGAGCGTCATTTCAACCCTCAAACCCCCGGGTTTGGTGTTGGAGATCAGCATGAGTCCTTCGGGGCGACGCCGTCTCCCAAATATAGTGGCGGTCTCGCTGTAGCTTCCTATGCGTAGTAGCACACCTCGCACTGGAAAGCAGCGCGGCCACGCCGTTAAACCCCCAACTTTTCTGAGTTTGACCTCGAATCAGGTAGGATTACCCGCTGAACTTAA	AF220964	SH217321.06FU		Plant pathogen		Fungi	Ascomycota	Sordariomycetes	Hypocreales	Nectriaceae	Cylindrocladiella	JX243750	Cylindrocladiella_sp_P_del_a
GL02089	ID1YYUI02GSM53	CTAGACTCGTCACCGATGGAAGAACGCAGCAAAATGCGATAAGTAATGCGAATTGCAGAATTCAGTGAATCATCGAATCTTTGAACGCACATTGCGCCCGCTGGTATTCCGGCGGGCATGCCTGTTCGAGCGTCATTTCAACCCTCAAGCCCCCGGGTTTGGTGTTGGGGATCGGCTCTGCCCTTCTGGGCGGTGCCGCCCCCGAAATACATTGGCGGTCTCGCTGCAGCCTCCATTGCGTAGTAGCTAACACCTCGCAACTGGAACGCGGCGCGGCCATGCCGTAAAACCCCAACTTCTGAATGTTGACCTCGGATCAGGTAGGAATACCCGCTGAACTTAA	EF601642	SH219457.06FU		Plant pathogen		Fungi	Ascomycota	Sordariomycetes	Hypocreales	Nectriaceae	Fusarium	KC180709	Fusarium_tricinctum
GL33644	ID1YYUI02IRYGP	ACGTATCTAGATCGTCATCGATGAAGAACGTGGCAAAATGCGATAAGTAATGTGAATTGCAGAATTCAGTGAATCATCGAATCTTTGAACGCACATTGCGCCCGCCAGTATTCTGGCGGGCATGCCTGTTCGAGCGTCATTTCAACCCTCAAGCCCCCGGGTTTGGTGTTGGGGATCGGGCTGTACTCCAGCCCGGCCCCGAAATCTAGTGGCGGTCTCGCTGCAGCCTCCATTGCGTAGTAGCTAACACCTCGCAACTGGAACGCGGCGCGGCCAAGCCGTTAAACCCCCAACTTCTGAATGTTGACCTCGGATCAGGTAGGAATACCCGCTGAACTTAA	KC427033	SH219458.06FU		Plant pathogen		Fungi	Ascomycota	Sordariomycetes	Hypocreales	Nectriaceae	Fusarium	JX951176	fungal_sp_TCPR_109
GL36780	ID1YYUI01CWUBX	CTAGACTCGTCACCGATGAAGAACGCAGCGAAATGCGATAAGTAATGTGAATTGCAGAATTCCGTGAATCATCGAATCTTTGAACGCACATTGCGCCCGCTAGTATTCTGGCGGGCATGCCTGTTCGAGCGTCATTTCAACCCTCAAGCCCCCGGGCTTGGTGTTGGGGAACGGCCCGCCCCTAGCGGCAGGCCGGCCCCGAAATCTAGTGGCGGTCTCGCGATAGCCTCCTCTGCGTAGTAGCAATATCTCGCACTGGAACTGAGCGACGACCACGCCGTTAAACCCCCCACTTTCTGAAGGTTGACCTCGGATCAGGTAGGAATACCCGCTGAACTTAA	HE998702	SH217368.06FU		Plant pathogen		Fungi	Ascomycota	Sordariomycetes	Hypocreales	Nectriaceae	Fusarium	HQ897818	Fusarium_ciliatum
GL37555	IGJRWKL02JBBS6	CTAGACTCGTCATCGATGAAGAACGCTGCAAAATGCGATAAGTAATGTGAATTGCAGAATTCAGTGAATCATCGAATCTTTGAACGCACATTGCGCCCGCCAGTATTCTGGCGGGCATGCCTGTTCGAGCGTCATTTCAACCCTCAAGCCCCCGGGTTTGGTGTTGGGGATCGGCGAGTCTTAGGACCAGCCGCCCCCTAAATCTAGTGGCGGTCTCACTGCAGCCTCCATTGCGTAGTAGCTAACACCTCGCAACTGGAACGCGGTGCGGCCATGCCGTTAAACCCCCAACTTCTGAATGTTGACCTCGGATCAGGTAGGAATACCCGCTGAACTTAA	DQ655728	SH219466.06FU		Plant pathogen		Fungi	Ascomycota	Sordariomycetes	Hypocreales	Nectriaceae	Fusarium	JQ388254	Fusarium_sp_2_DoF9
GL38213	ID1YYUI01BHEPY	CTAGACTCGTCAACGATGAAGAACGCAGCGAAATGCGATAAGTAGTGTGAATTGCAGAATTCAGTGAATCATCGAATCTTTGAACGCACATTGCGCCCGCCAGCTATTCTGGCGGGCATGCCTGTTCGAGCGTCATTTCAACCCTCAAGCCCCAGTGGCTTGGTGTTGGCGACGCGGCCGGTCTCAGCGCCGGCCGCCGCCGAAATGCAGGGGCGGTCGCCTCGCGGCAACCATTACGCAGTAGTAACATCTCGTAACTGGGACGCGGGGCGGCCACGCCTAACCCACTCATTTTTTAGAGTTGACCTCGGATCAGGTAGGGATACCCGCTGAACTTAA	DQ069057	SH225201.06FU		Plant pathogen		Fungi	Ascomycota	Sordariomycetes	Hypocreales	Nectriaceae	Fusarium	HM036620	fungal_sp_aurim724
GL39565	IGJRWKL02J2AMK	CTAGACTCGTCACCGATGAAGAACGCAGCAAAATGCGATAAGTAATGTGAATTGCAGTAATTCAGTGAATCATCGAATCTTTGAACGCACATTGCGCCCGCCAGTATTCTGGCGGGCATGCCTGTTCGAGCGTCATTTCAACCCTCAAGCTCAGCTTGGTGTTGGGACTCGCGGTAACCCGCGTTCCCCAAATCGATTGGCGGTCACGTCGAGCTTCCATAGCGTAGTAATCATACACCTCGTTACTGGTAATCGTCGCGGCCACGCCGTTAAACCCCAACTTCTGAATGTTGACCTCGGATCAGGTAGGAATACCCGCTGAACTTAA	JN038466	SH217298.06FU		Plant pathogen		Fungi	Ascomycota	Sordariomycetes	Hypocreales	Nectriaceae	Fusarium	KC341969	Fusarium_sp_AL_24_IRH_2012k
GL44769	ID03IXK02HTFX2	CTAGACTCGTCATCGATGAAGAACGTAGCAAAATGCGATAAGTAATGTGAATTGCAGAATTCAGTGAATCATCGAATCTTTGAACGCACATTGCGCCCGCCAGTATTCTGGCGGGCATGCCTGTTCGAGCGTCATTTCAACCCTCAAGCCCAGCTTGGTGTTGGGATCTGTGTGCAAACACAGTCCCCAAATTGATTGGCGGTCACGTCGAGCTTCCATAGCGTAGTAATTTACACATCGTTACTGGTAATCGTCGCGGCCACGCCGTTAAACCCCAACTTCTGAATGTTGACCTCGGATCAGGTAGGAATACCCGCTGAACTTAA	HM037985	SH217307.06FU		Plant pathogen		Fungi	Ascomycota	Sordariomycetes	Hypocreales	Nectriaceae	Fusarium	JQ437607	Fusarium_sp_KBS0805F
GL37791	ID1YYUI02II3M1	CTAGACTCGTCATCGATGAAGAACGCTGCGAAATGCGATAAGTAATGTGAATTGCAGAATTCAGTGAATCATCGAATCTTTGAACGCACATTGCGCCCGCCAGTATTCTGGCGGGCATGCCTGTTCGAGCGTCATTTCAACCCTCAAGCCCTCGGGTTTGGTGTTGGGGATCGGCGAGCCTCACGGCAAGCCGGCCCCGAAATACAGTGGCGGTCTCGCTGCAGCTTCCATTGCGTAGTAGTAAAACCCTCGCAACTGGTACGCGGCGCGGCCAAGCCGTTAAACCCCCAACTTCTGAATGTTGACCTCGGATCAGGTAGGAATACCCGCTGAACTTAA	GU257902	SH217305.06FU		Plant pathogen		Fungi	Ascomycota	Sordariomycetes	Hypocreales	Nectriaceae	Gibberella	HM162164	uncultured_Ascomycota
GL02355	ID1YYUI01DX5XW	CTAGAACTCGTCATCGATGAAGAACGCAGCGAAATGCGATAAGTAATGTGAATTGCAGAATTCAGTGAATCATCGAATCTTTGAACGCACATTGCGCCCGCCAGTATTCTGGCGGGCATGCCTGTTCGAGCGTCATTTCAACCCTCAAGCCCCCGGGCTTGGTGTTGGAGATCGGCAACTGCCCCTTGCGGGTGCGCCGTCTCCCAAATCTAGTGGCGGTCTCGCTGTAGCTTCCTCTGCGTAGTAATTCACCTCGCTCTGGAACGCGGCGCGGCCACGCCGTTAAACCCCCCACTTCTGAAGGTTGACCTCGGATCAGGTAGGACTACCCGCTGAACTTAA	EF495240	SH217309.06FU		Saprotroph		Fungi	Ascomycota	Sordariomycetes	Hypocreales	Nectriaceae	Glionectria	JN871719	Gliocladiopsis_sumatrensis
GL03141	ID1YYUI01BLL04	GACCACACCTAGTATCTAGACTCGTCATCGATGAAGAACGCTGCGAAATGCGATAAGTAATGTGAATTGCAGAATTCAGTGAATCATCGAATCTTTGAACGCACATTGCGCCCGCCAGTATTCTGGCGGGCATGCCTGTTCGAGCGTCATTACAACCCTCAGGCCCCCGGGCCTGGCGTTGGGGATCGGCGGAAGCCCCCTGCGGGCACAACGCCGTCCCCCAAATACAGTGGCGGTCCCGCCGCAGCTTCCATTGCGTAGTAGCTAACACCTCGCAACTGGAGAGCGGCGCGGCCACGCCGTAAAACACCCAACTTCTGAATGTTGACCTCGAATCAGGTAGGAATACCCGCTGAACTTAA	JF323002	SH233666.06FU		Plant pathogen		Fungi	Ascomycota	Sordariomycetes	Hypocreales	Nectriaceae	Haematonectria	KC506385	fungal_sp_AM2013
GL31844	IGJRWKL02HM35L	CTGTTCGAGCGTCATTTCAACCCTCAAGCCCCCGGGCTTGGTGTTGGGGCTCGGCCCGCCCTTAGCGGCGCGCCGTCCCCGAAATCTAGTGGCGGTCTCGCGATAGCCTCCTCTGCGTAGTAGCAATATCTCGCACTGGAAACTTCGCAAGCCCACGCCGTTAAACCCCCCACTTCTGAAAGGTTGACCTCGGATCAGGTAGGAATACCCGCTGAACTTAA	KC349903	SH217324.06FU				Fungi	Ascomycota	Sordariomycetes	Hypocreales	Nectriaceae	Microcera	AF502758	leaf_litter_ascomycete_strain_its229
GL37579	IGJRWKL02FRP3W	AGACTCGTCATCGATGAAGAACGCAGCGAAATGCGATAAGTAATGTGAATTGCAGAATTCCGTGAATCATCGAATCTTTGAACGCACATTGCGCCCGCCAGTATTCTGGCGGGCATGCCTGTTCGAGCGTCATTTCAACCCTCAAGCCCCCGGGCTTGGTGTTGGGGCTCGGCCCGTCCTCGTGGCGCGCCGTCCCCGAAATCTAGTGGCGGTCTCGCGATAGCCTCCTCTGCGTAGTAGCAATATCTCGCACCGGGACTGAGCAAGGCCACGCCGTTAAACCCCCCACTTCTGAAAGGTTGACCTCGGATCAGGTAGGAATACCCGCTGAACTTAA	KC349903	SH217324.06FU				Fungi	Ascomycota	Sordariomycetes	Hypocreales	Nectriaceae	Microcera	EU860075	Fusarium_sp_F_267,619
GL31827	IGJRWKL02IU3V7	TGAGGACGCCGACCACACCTAGTATCTAGACTCGTCAACGATGAAGAACGCAGCGAAATGCGATAAGTAATGTGAATTGCAGAATTCAGTGAATCATCGAATCTTTGAACGCACATTGCGCCCGCCAGTATTCTGGCGGGCATGCCTGTTCGAGCGTCATTTCAACCCTCAAGCCCCCGGGCTTGGTGTTGGGGATCGGCGTGCCCTCGCGGCGCGCCGTCCCCTAAATCTAGTGGCGGTCTCGCTGTAGCTTCCTCTGCGTAGTAGCAACACTCGCACTGGATCGCAGCGCGGCCACGCCGTTAAACCCCCCACTTCTGAAAGTTTGACCTCGGATCAGGTAGGAATACCCGCTGAACTTAA	AY787694	SH217316.06FU		Plant pathogen		Fungi	Ascomycota	Sordariomycetes	Hypocreales	Nectriaceae	Neonectria	JX270441	Neonectria_sp_11MA06
GL33227	IGJRWKL02JW42O	CTAGACTCGTCATCGATGAAGAACGCTGCGAAATGCGATAAGTAATGTGAATTGCAGAATTCAGTGAATCATCGAATCTTTGAACGCACATTGCGCCCGCCAGTACTCTGGCGGGCATGCCTGTCCGAGCGTCATTTCAACCCTCGAGCCCGTCTCGGTGTTGGGGGCCCCACGGCCGCGAGGCCGCCCCCGAAATGCATTGGCGACCCCGCCGCGGCCTCCCCTGCGCAGTAGCTCCCAGAGAACCTCGCACCGGAAACGCGGAGGCGGTCACGCCGTAAAACAACTCTCCTCCTGGAAGTTGACCTCGGATCAGGTAGGGATACCCGCTGAACTTAA	AY745253	SH227636.06FU		Animal parasite		Fungi	Ascomycota	Sordariomycetes	Hypocreales	Ophiocordycipitaceae	Hirsutella	AY745253	Hirsutella_rhossiliensis
GL35472	ID1YYUI02I2KUX	CTAGACTCGTCATCGATGAAGAACGCTGCGAAATGCGATAAGTAATGTGAATTGCAGAATTCAGTGAATCATCGAATCTTTGAACGCACATTGCGCCCGCCAGCACTCTGGCGGGCATGCCTGTCCGAGCGTCATTTCACCCCTCAAGTCCACCCCCAGGGTGCTTGGTGTTGGGGGCCGGCCGGGAGAGCCCCGCGCCGCCCCCGAAATGCAGTGGCGACCCCGCCGCAGCCTCCCCTGCGCAGTAGCACACCTCGCACCGGAGCGCGGAGGCGGTCACGCCGTAAAACGCCCCAACTCCCACGAGTTGACCTCGGATCAGGTAGGAGTACCCGCTGAACTTAA	HQ608141	SH197948.06FU				Fungi	Ascomycota	Sordariomycetes	Hypocreales	Ophiocordycipitaceae		JX155907	fungal_endophyte
GL30818	IGJRWKL02GBIA7	CTAGACTCGTCACCGATGAAGAACGCAGCGAAACGCGATATGTAATGTGAATTGCAGAATTCAGTGAATCATCGAATCTTTGAACGCACATGGCGCCTTCCAGTATCCTGGGAGGCATGCCTGTCCGAGCGTCGTTTCAACCCTCGAGCCCTCGTGGCCCGGCGTTGGGGATCCGCCCAGGCGGTCCCCGAAAACCAGTGGCGGACCTTTCAGGCCCTTCTTTGCGTAGTAGCATTCGCCTCGCATCGGAAGCCCGTGGGACTCCTGCCTCTAAACCCCCCCCAAAGCCCGCTCCGGCGGCACCAAGGTTGACCTCGGATCAGGTAGGAATACCCGCTGAACTTAA	KC287233	SH219656.06FU		Plant pathogen		Fungi	Ascomycota	Sordariomycetes	Hypocreales	Plectosphaerellaceae	Gibellulopsis	HQ433001	uncultured_Ascomycota
GL34712	IGJRWKL02JF2X6	CTAGACTCGTCATCGATGAAGAACGCAGCGAAACGCGATATGTAATGTGAATTGCAGAATTCAGTGAATCATCGAATCTTTGAACGCGCATGGCGCCTTCCAGTATCCTGGGAGGCATGCCTGTCCGAGCGTCGTTTCAACCCTCGAGCCCCCGTGGCCCGGCGTTGGGGACCTGCCCAGGCAGTCCCCGAAAACCAGTGGCGGACCCGACGGGCCCTTCCTTTGCGTAGTAACATCTGCCTCGCATCGGGAGCCCCCGGGCTATCCGGCCTCTAAACCCCCCTCAAGCCCGCTCCGGCGGCACCAAGGTTGACCTCGGATCAGGTAGGAATACCCGCTGAACTTAA	DQ825985	SH219632.06FU		Plant pathogen		Fungi	Ascomycota	Sordariomycetes	Hypocreales	Plectosphaerellaceae	Gibellulopsis	KC156644	Gibellulopsis_nigrescens
GL01973	IGJRWKL02F7PY6	CTAGACTCGTCACCGATGAAGAACGCAGCGAAACGCGATATGTAATGTGAATTGCAGAATTCAGTGAATCATCGAATCTTTGAACGCACATGGCGCCTTCCAGTATCCTGGGAGGCATGCCTGTCCGAGCGTCGTTTCAACCCTCGAGCCCTCGTGGCCCGGCGTTGGGGATCTGCCACGGCAGGCCCCTAAAACCAGTGGCGGACCCGAAGGGCCCTCTCCTTTGCGCAGTAGCATCAGCCTCGCATCGGGAGTCCTCGGCGTCCTGCCTCTAAACCCCCTACAAGCCCGCCCCGGCGGCACCAAGGTTGACCTCGGATCAGGTAGGAATACCCGCTGAACTTAA	KC753428	SH219630.06FU		Plant pathogen		Fungi	Ascomycota	Sordariomycetes	Hypocreales	Plectosphaerellaceae	Plectosphaerella	JF449551	uncultured_Plectosphaerella
GL34289	IGJRWKL02IB3VK	CTAGACTCGTCATCGATGAAGAACGTAGCGAAATGCGATAAGTAATGTGAATTGCAGAATTCAGTGAATCATCGAATCTTTGAACGCACATTGCGCCCGCCAGCATTCTGGCGGGCATGCCTGTTCGAGCGTCATTTCAACCCTCGAGCTCCCTTTGGGGAGCCCGGCGTTGGGGACCGGCAGCTACCGCCGACCCCGAAATACAGTGGCGGCCCGTCACGGCGACCTCTGCGTAGTAATCCAACCTCGCACCGGGAACCCGACGCGGCCACGCCGTAAAACACCCCAATTCTGAACGTTGACCTCGGATCAGGTAGGAATACCCGCTGAACTTAA	EF641875	SH196302.06FU		Plant pathogen		Fungi	Ascomycota	Sordariomycetes	Hypocreales	Plectosphaerellaceae	Verticillium	FN298802	uncultured_fungus
GL29405	IGJRWKL02HCIXV	CTAGACTCGTCATCGATGAAGAACGCTGCGAAATGCGATAAGTAATGCGAATTGCAGAATTCAGTGAATCATCGAATCTTTGAACGCACATTGCGCCCGCCAGTATTCTGGCGGGCATGCCTGTCTGAGCGTCAGTTCAACCCTCACAACCGGCTTTCTTTGCTGGATGTGGTGTTGGGGATCGGCTGCCTTTCTTCTAGGTGGCCGGCCCCGAAATAGAGTGGCGGTCTCGTCGTGGCCTCCTCTGCGTAGTAGCAATATCTCGCAGGCGGAGAGCGGCGTGGCTATGCCGTAAAACACCCAACTCTTCTAAGGTTGACCTCAGATCAGGTAGGAATACCCGCTGAACTTAA	JX276044	SH224304.06FU		Saprotroph		Fungi	Ascomycota	Sordariomycetes	Hypocreales		Acremonium	GQ996136	fungal_sp_mh177722
GL31467	ID1YYUI02FS7Q9	CTAGACTCGTCATCGATGAAGAACGCTGCGAAATGCGATAAGTAATGCGAATTGCAGAATTCAGTGAATCATCGAATCTTTGAACGCACATTGCGCCCGCCAGTATTCTGGCGGGCATGCCTGTCTGAGCGTCAGTTCAACCCTCGCAACCGGCTTTCTTGCTGGATGCGGTGTTGGGGATCGGCTGCCTTCTTCTAGGTGGCCGGCCCCGAAATAGAGTGGCGGTCTCGTCGTGGCCCTCCTCTGCGTAGTAGCAATATCTCGCAGGCGGAGAGCGGCGTGGCTATGCCGTAAAACACCCAACTCTTCTAAGGTTGACCTCAGATCAGGTAGGAATACCCGCTGAACTTAA	JX276044	SH224304.06FU		Saprotroph		Fungi	Ascomycota	Sordariomycetes	Hypocreales		Acremonium	AJ608950	fungal_sp_FFI_10
GL38948	ID1YYUI02GN4QA	TCTGGCGGGCATGCCTGTTCGAGCGTCATTTCAACCCTCAGAACCCCTTCGGGGGATCTGGCGTTGGGGATCGGCAGCCCGCCGGCCCCGAAATATAGTGGCGGTCCCTCTGTGACCTTCCCTGTGTAGTAGTGATACCTCGCAGCGGGATAGCAGTCTGACCACGCCGTAAAACACCCCACTTCTCAAGGTTGACCTCGAATCAGGTAGGAATACCCGCTGAACTTAA	HE608644	SH195260.06FU		Saprotroph		Fungi	Ascomycota	Sordariomycetes	Hypocreales		Acremonium	HE608649	Acremonium_asperulatum
GL32863	IGJRWKL02JRHK4	CTAGACTCGTCAACGATGAAGAACGCAGCGAAATGCGATAAGTAATGTGAATTGCAGAATTCAGTGAATCATCGAATCTTTGAACGCACATTGCGCCCGCCAGTATTCTGGCGGGCATGCCTGTTCGAGCGTCATTTCAACCCTCAGGCCCCCAGTGCCTGGCGTTGGGGATCGGCCGACGGCAGCCCTCGGGCTCGCCTGGCCGTCCCCGAAATCTAGTGGCGGTCTCGCTGTAGTCCTCCTCTGCGTAGTAGCACAACCTCGCAGCTGGAACGCGGCGGTGGCCATGCCGTTAAACACCCCACTTCTGAAAGTTGACCTCGGATCAGGTAGGAATACCCGCTGAACTTAA	AY254152	SH199494.06FU		Saprotroph		Fungi	Ascomycota	Sordariomycetes	Hypocreales		Myrothecium	HQ432967	uncultured_Ascomycota
GL32941	ID1YYUI01EM17S	CTAGACTCGTCACCGATGAAGAACGCTGCGAAATGCGATAAGTAATGTGAATTGCAGAATTCAGTGAATCATCGAATCTTTGAACGCACATTGCGCCCGCGAGTATTCTCGAGGGCATGCCTGTCCGAGCGTCATTTCAACCCTCAGGGCCCGCCTGCTTGCAGGCGCGGCGCTGGTGTTGGGGATCGGCTACCCTGCCGTCCCCCAAATACAGTGGCGGTCTCGCTGCAGCCTCCCCTGCGTAGTAGCAACACTCGCATGCGGAGCGCGGCGCGGCCACGCCGTAAAACCCCCGACTTTCTGAACGTTGACCTCGGATCAGGTAGGAATACCCGCTGAACTTAA	DQ092526	SH227390.06FU		Saprotroph		Fungi	Ascomycota	Sordariomycetes	Hypocreales		Myrothecium	EU479770	uncultured_soil_fungus
GL33210	ID1YYUI01B8VTI	CTAGACTCGTCATCGATGAAGAACGCAGCGAAATGCGATAAGTAATGTGAATTGCAGAATCCAGTGAATCATCGAATCTTTGAACGCACATTGCGCCCGCCAGTATTCTGGCGGGCATGCCTGTTCGAGCGTCATTTCAACCCTCAAGCTCTGCTTGGCGTTGGGGATCGGCATCCCGGCTTCGCGCCGCGCCGTCCCTCAAATACAGTGGCGGTCACGCTGCAGCTTCCCTTGCGTAGTAGCACACCTCGCACCGGAGAGCAGCGCGGCCACGCCGTAAAACCCCCGACTTCTTGTTTTTGACCTCGAATCAGGTAGGACTACCCGCTGAACTTAA	DQ421127	SH235575.06FU		Saprotroph		Fungi	Ascomycota	Sordariomycetes	Hypocreales		Myxocephala	AB671495	Myxocephala_albida
GL26220	IGJRWKL02HU4QN	CTAGACTCGTCACCGATGAAGAACGCAGCGAAATGCGATACGTAATGTGAATTGCAGATCTCTCAGTGAATCATCGAATCTTTGAACGCACATAGCGCCCGCCGGCCATTCCGGCGGGCATGCCTGTCCGAGCGTCGATGACGCCGTTCGAGCCCCTTTGATGGGCTCGGTGTTGGGGCGCTAGGTAACACTAGGCCCCCAAGCAGAAGTGCGCGGTCCGGCTGTGGGCCCCGGGTACAGTAACTTTACCGTTAGATGCCCTGGGAGAAGCAGCTAGGCTTGCCGTAAAACCCCCGACATAGGGACCCCCGCAAGGGAGGGACCGCCATATGTTGACCTCGGATCAGGTAGGACTACCCGCTGAACTTAA	HQ021813	SH210782.06FU				Fungi	Ascomycota	Sordariomycetes	Hypocreales			HQ022030	uncultured_Ascomycota
GL27741	IGJRWKL02IY8D5	CTAGACTCGTCACCGATGAAGAACGCAGCGAAATGCGATAAGTAATGTGAATTGCAGAATTCCGTGAATCATCGAATCTTTGAACGCACATTGCGCCCACCAGTACTCTGGTGGGCATGCCTGTCCGAGCGTCATTTCGACCCTCGAGCCCCCCCGCAGCGGGCTCGGTGCTGGGACGCTACAGCGCTATCAAGCGCTGTAGGCCCCGAAATACAGTGGCGGCCTCGCCGAGACCCCGAGCGCAGTAAACCGTGTCTTAGCACAGCGCCTCGCTCAGGGCGTCCCGGCGGGTGCCCCGGCCATTAAACCCCCTATATTATAGAAGGTTGACCTCGGATCAGGTAGGAATACCCGCTGAACTTAA	AB646523	SH222756.06FU				Fungi	Ascomycota	Sordariomycetes	Hypocreales			JQ312886	uncultured_fungus
GL30939	ID1YYUI01EF4A9	CATTTCAACCCTCAGGACTCTTCGGAGAACTGGTGTTGGGGATCAGCGTAGGCGCGGGGTTACACCCGCCAGCTGGCCCTGAAATACAGTGGCGGTCTTGCTCTGACTCCCTCGCGTAGTAACTTACCTCGCTTGTGAAGATTAGCCTGACCACGCCGTAAAACCCCCTACTTTTTTATGGTTGACCTCGAATCAGGTAGGAATACCCGCTGAACTTAA	HE584928	SH223975.06FU				Fungi	Ascomycota	Sordariomycetes	Hypocreales			JN890389	uncultured_fungus
GL31216	IGJRWKL02JXMFC	CTAGACTCGTCACCGATGAAGAACGCAGCGAAATGCGATAAGTAATGTGAATTGCAGAATTCAGTGAATCATCGAATCTTTGAACGCACATTGCGCCCGCCAGTATTCTGGCGGGCATGCCTGTTCGAGCGTCATTTCAACCCTCAAGCCCCCGGGCTTGGTGTTGGAGATCGGCACAACGTCCCTCGCGGACGCGCCGTCTCCCAAATCTAGTGGCGGTCTCGCTGTAGCTTCCTCTGCGTAGTAACTCACCTCGCACTGGGACGCGGCGCGGCCACGCCGTTAAACACCCCACTTCTGAAGGTTGACCTCGGATCAGGTAGGACTACCCGCTGAACTTAA	AF502786	SH217391.06FU				Fungi	Ascomycota	Sordariomycetes	Hypocreales			AF502786	leaf_litter_ascomycete_strain_its261
GL34558	ID1YYUI01A6IXE	CTAGACTCGTCACCGATGAAGAACGCAGCGAAATGCGATAAGTAATGTGAATTGCAGAATTCAGTGAATCATCGAATCTTTGAACGCACATTGCGCCCGCTAGTATTCTGGCGGGCATGCCTGTCTGAGCGTCATTTCAACCCTCAAGCAACATCTGCTTGGTGTTGGGGAACGGCCGTCAAACGCCGCCCCCTAAATCTATTGGCGATCTCGCTGTAGCTTCCTATGCGTAGTAGTAACATCTCGCATGTGGAGAGCGGCGCGGTCATGCCGTAAAACACCCAACTTTTTTCAGGTTGACCTCAGATCAGGTAGGAATACCCGCTGAACTTAA	EF635837	SH217401.06FU				Fungi	Ascomycota	Sordariomycetes	Hypocreales			EU516893	uncultured_Hypocreales
GL34559	ID1YYUI01CJTKS	CCTGTTCGAGCGTCATTTCAACCCTCGCGGCCTTCCGGCAGCGGTGTTGGCCAACAGCTGCTGGGGAACTCCCCCGGCGGCTGCGGCCCAAATACAGTGGCGGTCTCGCTGCACTTGCTCTGCGTAGTAGCACACCTCGCATTGCAAAGTAGCGGGCCCACGCCGTAAAACCCCAACTTTTAGAGTTTGACCTCGGATCAGGTAGGAATACCCGCTGAACTTAA	KF296908	SH230367.06FU				Fungi	Ascomycota	Sordariomycetes	Hypocreales			JF449629	uncultured_Hypocreales
GL36962	ID1YYUI02H8TSY	CTAGACTCGTCATCGATGAAGAACGCAGCGAAATGCGATAAGTAATGTGAATTGCAGAATTCAGTGAATCATCGAATCTTTGAACGCACATTGCGCCCGCCAGTACTCTGGCGGGCATGCCTGTCTGAGCGTCATTTCAACCCTCGAGCCCCTTTGGACTCGGCGTTGGGGATCGGCCTTCCCTCGTGGCGGCCGGCCCCGAAATCTAGTGGCGGTCTCGCTGTAGCCTCCTCTGCGTAGTAGCAATATCTCGCAGGCGGAGAGCGGCGCGGCCACGCCGTGAAACACCCAACTATACCAAGGTTGACCTCAGATCAGGTAGGACTACCCGCTGAACTTAA	GU817157	SH227330.06FU				Fungi	Ascomycota	Sordariomycetes	Hypocreales			GU817200	uncultured_fungus
GL26286	IGJRWKL02HCH30	CTAGACTCGTCAACGATGAAGAACGCAGCGAAATGCGATAAGTAATGTGAATTGCAGAATTCAGTGAACCATCGAATCTTTGAACGCACATTGCGCCCGGCAGTAATCTGCCGGGCATGCCTGTCCGAGCGTCATTTCTGCCCTCGAGCGCTGCTGGCTTGCCAGCAGCTGCCCGGTGTTGGGGCGCTACGGTTCAGGGCCTCGTGCCCTGTCCGTAGGCCCCGAAATGAAGTGGCGGTCCCGCCGCGGCGCCCCCTGCGTAGTATTACAACTCGCATCGGGACCCGGAGGTGACCAGCCGTCAAACCCAACTTTCTAATAGTTTGACCTCGGATCAGGTAGGGTTACCCGCTGAACTTAA	JX270525	SH195214.06FU		Saprotroph		Fungi	Ascomycota	Sordariomycetes	Microascales	Microascaceae	Doratomyces	FJ946487	Kernia_sp_HSAUP074335
GL27611	IGJRWKL02H4XVL	TAGTATCTAGACTCGTCATCGATGAAGAACGCAGCGAAATGCGATAAGTAATGTGAATTGCAGAATTCAGTGAACCATCGAATCTTTGAACGCACATTGCGCCCGGCAGTAATCTGCCGGGCATGCCTGTCCGAGCGTCATTTCTGCCCTCGAGCGCTGCTGGCTTGCCAGCAGCTGCCCGGTGTTGGGGCGCTACGGTTCAGGGCCTCGTGCCCTGTCCGTAGGCCCCGAAATGAAGTGGCGGTCCCGCCGCGGCGCCCCCTGCGTAGTAGTATTTCAACTCGCATCGGGACCCGGTGGTGACCAGCCGTCAAACCCAACTTTCTAATAGTTTGACCTCGGATCAGGTAGGGTTACCCGCTGAACTTAA	JX270525	SH195214.06FU		Saprotroph		Fungi	Ascomycota	Sordariomycetes	Microascales	Microascaceae	Doratomyces	FJ946487	Kernia_sp_HSAUP074335
GL29558	IGJRWKL02IBY0X	CTAGATCGTCATCGATGAAGAACGTAGCGAAATGCGATAAGTAATGTGAATTGCAGAATTCAGTGAACCATCGAATCTTTGAACGCACATTGCGCCCGGTAGTAATCTGCCGGGCATGCCTGTCCGAGCGTCATTTCTCCCCTCGAGCGCGGCTTCACGGCCTGTCGCTCGGTGTTGGGGCGCTACGGTGGGAGCCCCGCGCTCCCCCGTAGGCCCCGAAATGTAGTGGCGGTCCCGCCGCGGCGCCCCCTGCGTAGTAGTCTTACAACTCGCATCGGGACCCGGCGGAGGCCAGCCGTCAAACCCCCAACTTCAATAGTTTGACCTCGGATCAGGTAGGGTTACCCGCTGAACTTAA	JX982451	SH195212.06FU		Saprotroph		Fungi	Ascomycota	Sordariomycetes	Microascales	Microascaceae	Kernia	DQ318208	Kernia_pachypleura
GL35351	ID1YYUI01EI1ZW	CTAGAACTCGTCATCGATGAAGAACGTAGCGAAATGCGATAAGTAATGTGAATTGCAGAATTCCGTGAATCATCGAATCTTTGAACGCACATTGCGCCCGCCAGTATTCTGGCGGGCATGCCTGTTCGAGCGTCATTTCAACCCTCAAGCCCCCGGGCTTGGTGTTGGGGCTCGGCCCGTCCCTAGCGGCGCGCCGTCCCCGAAATCTAGTGGCGGTCACGCTGTACTCCTCTGCGTAGTAATCTAACCTCGCAACGGGACAAAGCGCGGCCACGCCGTTAAACCCCCAACTTCTGAAGGTTGACCTCGGATCAGGTAGGAATACCCGCTGAACTTAA	KC008767	SH217317.06FU		Saprotroph		Fungi	Ascomycota	Sordariomycetes	Microascales	Microascaceae	Wardomyces	JQ618506	uncultured_fungus
GL38567	IGJRWKL02GBMTV	CTAGACTCGTCACCGATGAAGAACGCAGCGAAATGCGATAACTAGTGTGAATTGCAGACCTCATGAATCATCGAATCTTTGAACGCACATTGCGCCCGCCGGTACTCCGGCGGGCATGCCTGTCCGAGCGTCATTGACAACCCCCAGGCCCTGGTGCCTGGTGTTGGGGCACTACAGCATGCTGTAGGCCCTGAAATCCAGTGGCGGGACCGCTGTAAACCCGGGCGTAGTAACTTTACGTCGTCCAGGGTGTTCCGGCGCGCCCCAGCCGTTAAACCCACCACATTATCAATTTTGGCCTCGGATCAGGTAGGATTACCCGCTGAACTTAA	HE599380	SH208184.06FU		Saprotroph		Fungi	Ascomycota	Sordariomycetes	Sordariales	Cephalothecaceae	Cephalotheca	EU690520	uncultured_soil_fungus
GL04205	ID1YYUI01C42QO	CTAGACTCGTCATCGATGAAGAACGCAGCGAAATGCGATAACTAGTGTGAATTGCAGACCTCATGAATCATCGAATCTTTGAACGCACATTGCGCCCGCCGGTACTCCGGCGGGCATGCCTGTCCGAGCGTCATTGACAACCCTCAGGCCTTGGTGCCTGGTGTTGGGGCACTACAGCATGCTGTAGGCCCTGAAATCCAGTGGCGGGACCGCTGTAAACCCGGGCGTAGTAACTTTACGTCGTCCAGGGTGTTCCGGCGCGCCCCAGCCGTTAAACCCCATCATATTATCAATTTTGGCCTCGGATCAGGTAGGATTACCCGCTGAACTTAA	HE599380	SH208184.06FU		Saprotroph		Fungi	Ascomycota	Sordariomycetes	Sordariales	Cephalothecaceae	Cephalotheca	EU690520	uncultured_soil_fungus
GL02219	ID1YYUI01ETPT4	CTAGGACTCGTCACCGATGAAGAACGCGGCGAAATGCGATAAGTAATGTGAATTGCAGAATTCAGTGAATCATCGAATCTTTGAACGCACATTGCGCCCGCCAGTATTCTGGCGGGCATGCCTGTTCGAGCGTCATTTCAACCATCAAGCCCCCGGGCTTGCGTTGGGGACCTGCGGCGACGCAGGCCCCGAAAACCAGTGGCGGGCTCGCTGTCCACACCGAGCGTAGTAGCATTCATGTCTCGCTCCGGGCGTGCTGCGGGTTCCGGCCGTGAAAACCGCCCCTCGGGGCACCCAAAGGTTGACCTCGGATCAGGTAGGAAGACCCGCTGAACTTAA	JX280845	SH234945.06FU		Saprotroph		Fungi	Ascomycota	Sordariomycetes	Sordariales	Chaetomiaceae	Chaetomium	HM449049	Chaetomium_dolichotrichum
GL36115	IGJRWKL02I6UCE	CTAGACTCGTCATCGATGAAGAACGCTGCGAAATGCGATAAGTAATGTGAATTGCAGAATTCAGTGAATCATCGAATCTTTGAACGCACATTGCGCCCGCCAGTATTCTGGCGGGCATGCCTGTTCGAGCGTCATTTCAACCATCAAGCCCCAGGCTTGTGTTGGGGACCTGCGGCTGCCGCAGGCCCTGAAATCCAGTGGCGGGTTCGCTGTCACCCCGAGCGTAGTAGCAATATCTCGCTCAGGGCGTGCTGCGGGCACCGGCCGTTAAAAGCTGCCTTCTGGCAACACCCAAGGTTGACCTCGGATCAGGTAGGAAGACCCGCTGAACTTAA	KF245432	SH221745.06FU		Saprotroph		Fungi	Ascomycota	Sordariomycetes	Sordariales	Chaetomiaceae	Chaetomium	JX317207	uncultured_fungus
GL36342	IGJRWKL02HJI97	CTAGACTCGTCAACGATGAAGAACGCAGCGAAATGCGATAAGTAATGTGAATTGCAGAATTCGGTGAATCATCGAATCTTTGAACGCACATTGCGCCCGCCAGTATTCTGGCGGGCATGCCTGTTCGAGCGTCATTTCAACCATCAAGCCCCAGGCTTGTGTTGGGGACCTGCGGCTGCCGCAGGCCCTGAAAAGCAGTGGCGGGCTCGCTGTCACACCGAAGCGTAGTAGCATACATCTCGCTCTGGGCGTGCTGCGGGTTCCGGCCGTTAAACCACCTTTTAACCCAAGGTTGACCTCGGATCAGGTAGGAAGACCCGCTGAACTTAA	HQ829122	SH234918.06FU		Saprotroph		Fungi	Ascomycota	Sordariomycetes	Sordariales	Chaetomiaceae	Chaetomium	KC007280	Chaetomium_sp_C_1_BESC_294y
GL40307	ID03IXK02IXUOG	CTAGACTCGTCATCGATGAAGAACGCTGCGAAATGCGATAAGTAATGCGAATTGCAGAATCCAGCGAGTCATCGAATCTTTGAACGCACATTGCGCCCGCCAGTACTCTGGCGGGCATGCCTGTTCGAGCGTCACTCTCTATCCGTCAAGCCCAGCTTGTGTTGGGGCACTGCGGCTGCCGCAGGCCCCCAAAGGAAGTGGCGGGACCGTTGTCGTGCCGAGCGTAGTACAGCACCTCGCTCCGGCGCCGGCAGTGGCCTCCAGCCGTTAAAGCCCCTACTTTTACGTACTGGTTGACCTCGAATCAGGTAGGAATACCCGCTGAACTTAA	HQ829122	SH234918.06FU		Saprotroph		Fungi	Ascomycota	Sordariomycetes	Sordariales	Chaetomiaceae	Chaetomium	GU308628	uncultured_fungus
GL36589	IGJRWKL02IC1FP	CTAGACTCGTCATCGATGAAGAACGTAGCGAAATGCGATAAGTAATGTGAATTGCAGAATTCAGTGAATCATCGAATCTTTGAACGCACATTGCGCCCGCCAGTATTCTGGCGGGCATGCCTGTTCGAGCGTCATTTCAACCATCAAGCCCCGGGCTTGTGTTGGGGACCTGCGGCTGCCGCAGGCCCTGAAATGCAGTGGCGGGCTCGCTGTCACTCCGAGCGTAGTAGTTACATCTCGCTCTGGGCGTGCTGCGGGTTCCGGCCGTTAAAAGCCTTATTTTACCCAAGGTTGACCTCGGATCAGGTAGGAAGACCCGCTGAACTTAA	GQ922575	SH234920.06FU		Saprotroph		Fungi	Ascomycota	Sordariomycetes	Sordariales	Chaetomiaceae	Humicola	HM371217	Humicola_sp_L_2
GL34234	ID1YYUI01DOC0W	CTAGACTCGTCATCGATGAAGAACGCTGCGAAATGCGATAAGTAATGTGAATTGCAGAATTCAGTGAATCATCGAATCTTTGAACGCACATTGCGCCCGCCAGTATTCTGGCGGGCATGCCTGTTCGAGCGTCATTTCAACCATCAAGCCCCCGGGCTTGTGTTGGGGACCTGCGGCTGCCCGCAGGCCCTGAAAACCAGTGGCGGGCTCGCTAGTCACACCGAGCGTAGTAGCATACATCTCGCTCAGGGCGTGCTGCGGGTTCCGGCCGTTAAACAGCCTCTGCGCTACACCCAAGGTTGACCTCGGATCAGGTAGGAAGACCCGCTGAACTTAA	JX280875	SH234936.06FU		Saprotroph		Fungi	Ascomycota	Sordariomycetes	Sordariales	Chaetomiaceae	Thielavia	HQ450638	Thielavia_sp_RS_2011
GL37725	ID1YYUI01DO5Q3	CTAGACTCGTCATCGATGAAGAACGCTGCGAAATGCGATAAGTAATGTGAATTGCAGAATTCAGTGAATCATCGAATCTTTGAACGCACATTGCGCCCGCCAGTATTCTGGCGGGCATGCCTGTTCGAGCGTCATTTCAACCATCAAGCCCCCGGGCTTGTGTTGGGGACCTGCGGCTGCCCGCAGGCCCTGAAAACCAGTGGCGGGCTCGCTAGTCACACCGAGCGTAGTAGCATACATCTCGCTCAGGGCGTGCTGCGGGTTCCGGCCGTTAAACAGCCTCTGCGCTATACACCCAAGGTTGACCTCGGATCAGGTAGGAAGACCCGCTGAACTTAA	JX280875	SH234936.06FU		Saprotroph		Fungi	Ascomycota	Sordariomycetes	Sordariales	Chaetomiaceae	Thielavia	HQ450638	Thielavia_sp_RS_2011
GL43248	IGJRWKL02HBVFF	CTAGACTCGTCAACGATGAAGAACGCAGCGAAATGCGATAAGTAATGTGAATTGCAGAATTCAGTGAATCATCGAATCTTTGAACGCACATTGCGCCCCCCAGTATTCTGGAGGGCATGCCTGTTCGAGCGTCATTTCAACCATCAAGCCCCGGGCTTGTGTTGGGGACCTGCGGCTGCCGCAGGCCCCGAAAAGCAGTGGCGGGCTCGCTGTCACACCGAGCGTAGTAGCAATCACCTCGCTCAGGGCGTGCTGCGGGTGCCGGCCGTTAAACCCCCTTAACTTCTAAGGTTGACCTCGGATCAGGTAGGAGTACCCGCTGAACTTAA	JX280873	SH234928.06FU		Saprotroph		Fungi	Ascomycota	Sordariomycetes	Sordariales	Chaetomiaceae	Thielavia	JN390827	Thielavia_subthermophila
GL02786	ID1YYUI01CUMIH	CTAGACTCGTCATCGATGAAGAACGCTGCGAAATGCGATAAGTAATGTGAATTGCAGAATTCAGTGAATCATCGAATCTTTGAACGCACATTGCGCCCGCCAGTATTCTGGCGGGCATGCCTGTTCGAGCGTCATTTCAACCATCAAGCCCCAGGCTTGTGTTGGGGACCTGCGGCTGCCGCAGGCCCTGAAAATCAGTGGCGGGGCTCGCTAGTCACTCCGAGCGTAGTAATACATCTCGCTCTGGACGTGCTTCGTGCTCCGGCCGTTAAACACCTTATTTACCCAAGGTTGACCTCGGATCAGGTAGGAAGACCCGCTGAACTTAA	JN573176	SH234919.06FU		Saprotroph		Fungi	Ascomycota	Sordariomycetes	Sordariales	Chaetomiaceae		HM239883	uncultured_Ascomycota
GL37055	IGJRWKL02JGEKW	CTAGACTCGTCACCGATGAAGAACGCAGCGAAATGCGATAAGTAATGTGAATTGCAGAATTCAGTGAATCATCGAATCTTTGAACGCACATTGCGCCCGCCAGTATTCTGGCGGGCATGCCTGTTCGAGCGTCATTTCAACCATCAAGCCCCCGGGCTTGTGTTGGGGACCTGCGGCTCCGGCCGCAGCCCCCGAAAATCAGTGGCGGGCTCGCTGTCCACACCGAGCGTGGTAGCATTCATGTCTCGCTCCGGTTGTGCGGCGCGCACCGGCCGTTAAACACGCCCTCGCGGCACCCAAGGTTGACCTCGGATCAGGTAGGAAGACCCGCTGAACTTAA	JX280845	SH234945.06FU		Saprotroph		Fungi	Ascomycota	Sordariomycetes	Sordariales	Chaetomiaceae		HM449049	Chaetomium_dolichotrichum
GL42651	IGJRWKL02I753X	CTAGACTCGTCATCGATGAAGAACGCTGCGAAATGCGATAAGTAATGCGAATTGCAGAATCCAGTGAGTCATCGAATCTTTGAACGCACATTGCGCCCGCCAGTATTCTGGCGGGCATGCCTGTTCGAGCGTCATTTCAACCATCAAGCCCCTCGGCTTGTGTTGGGGCCCTGCGGCCGCCCGCAGCCCCCGGAATGCAGTGGCGGGCTCGTCGTCACCCCGAGTGCAGTAATGCTCTTCTCTCTGGGCGTGGCGGCGGGTTCCGGCCGTGAAACAACCAAACCCATCAAGGTTGACCTCGGATCAGGTAGGAATACCCGCTGAACTTAA	GQ922524	SH222738.06FU		Saprotroph		Fungi	Ascomycota	Sordariomycetes	Sordariales	Lasiosphaeriaceae	Apiosordaria	JQ759663	Sordariomycetes_sp_genotype_81
GL37962	ID1YYUI02HZLI9	CTAGACTCGTCACCGATGAAGAACGCAGCGAAATGCGATAAGTAATGTGAATTGCAGAATTCAGTGAATCATCGAATCTTTGAACGCACATTGCGCCCGCTAGTATTCTGGCGGGCATGCCTGTTCGAGCGTCATTTCAACCATCAAGCCTTAGGCTTGTGTTGGGGCCCTGCGGCCGTCTGCAGCCCCCTAAAAATAGTGGCGGGCTCGCTATATACCGAGTGCAGTAGTTTACTCTTCGCTCAGGACGTGTAGCGGGTTCTGGCCGTAAAACCCCCAAATTTTCAAGGTTGACCTCGGATCAGGTAGGAATACCCGCTGAACTTAA	JF519313	SH222737.06FU		Saprotroph		Fungi	Ascomycota	Sordariomycetes	Sordariales	Lasiosphaeriaceae	Apodus	JF519313	uncultured_Apodus
GL40396	ID1YYUI01DPQTY	CTAGACCGTCATCGATGAAGAACGCTGCGAAATGCGATAAGTAATGTGAATTGCAGAATTCAGTGAATCATCGAATCTTTGAACGCACATTGCGCCCGCCAGTATTCTGGCGGGCATGCCTGTTCGAGCGTCATTTCAACCATCAGGCCCTCGGGCCCGTGTTGGGGCACTGCGCGCCAGTCGCGCAGGCCCTCAAAACCAGTGGCGGGCTCGCTGTCGCACCGAGCGTAGTAACATATCCCGCTTTGGACGTCGCGGCGGGCGCTTGCCGTAAAACACCCCCCTTCTCAAGGTTGACCTCGGATCAGGTAGGAATACCCGCTGAACTTAA	AY587917	SH210818.06FU		Saprotroph		Fungi	Ascomycota	Sordariomycetes	Sordariales	Lasiosphaeriaceae	Lasiosphaeria	AY587921	Lasiosphaeria_lanuginosa
GL02841	ID1YYUI01AUF62	CTAGACTCGTCATCGATGAAGAACGCTGCGAAATGCGATAAGTAATGTGAATTGCAGAATTCAGTGAATCATCGAATCTTTGAACGCACATTGCGCCCGCCAGTATTCTGGCGGGCATGCCTGTTCGAGCGTCATTTCAACCATCAAGCCCTGCTTGCGTTGGGGTCCTGCGGCTGCCCGCAGGCCCTTAAAACCAGTGGCGGGCTCGCTGTCACTCCGAGCGCAGTAATACATCTCGCTTTGGACCATGCAGCGGGTACCGGCCGTTAAACACCCCCCTTTTACAAGGTTGACCTCGGATCAGGTAGGAATACCCGCTGAACTTAA	EU685998	SH234927.06FU		Saprotroph		Fungi	Ascomycota	Sordariomycetes	Sordariales	Lasiosphaeriaceae	Podospora	AY999126	Podospora_appendiculata
GL43192	IGJRWKL02HYLW1	CTAGACTCGTCATCGATGAAGAACGCTGCGAAATGCGATAAGTAATGTGAATTGCAGAATTCAGTGAATCATCGAATCTTTGAACGCACATTGCGCCCGCTAGTATTCTGGCGGGCATGCCTGTTCGAGCGTCATTTCAACCATCAAGCCCTAGGCTTGTGTTGGGGCCCTGCGGCCGTCCGCAGCCCCCTAAAAGCAGTGGCGGGCTCGCTGTCACACCGAGCGCAGTAGTATATCTTCGCTGGGACGTGGTAGCGGGTTCCGGCCGTGAAACACCCCAATTTATCAAGGTTGACCTCGGATCAGGTAGGAATACCCGCTGAACTTAA	JX536282	SH234933.06FU		Saprotroph		Fungi	Ascomycota	Sordariomycetes	Sordariales	Lasiosphaeriaceae	Podospora	FJ440938	uncultured_Sordariales
GL44570	IGJRWKL02F69I4	CTAGACTCGTCAACGATGAAGAACGCAGCGAAATGCGATACGTAATGTGAATTGCAGATTTCAGTGAATCATCGAATCTTTGAACGCACATTGCGCCCGCTAGTATTCTGGCGGGCATGCCTGTTCGAGCGTCATTTCAACCATCAAGCCCCCGGCTTGCGTTGGAGCCCTGCGGCTGCCGCAGGCTCCCAAATCCAGTGGCGGGCTCGTCGTCGTACCGAGTGCAGTAAACATCCTCGCTCAGGGAACGCGTCGGGTTCTTGCCGTGAAACACCCCACATATCAAGGTTGACCTCGGATCAGGTAGGAATACCCGCTGAACTTAA	JX982439	SH222039.06FU		Saprotroph		Fungi	Ascomycota	Sordariomycetes	Sordariales	Lasiosphaeriaceae	Podospora	JN104535	Podospora_tetraspora
GL48267	ID1YYUI02G6KND	CTAGACTCGTCACCGATGAAGAACGCAGCGAAATGCGATAAGTAATGTGAATTGCAGAATTCAGTGAATCATCGAATCTTTGAACGCACATTGCGCCCGCTAGTATTCTGGCGGGCATGCCTGTTCGAGCGTCATTTCAACCATCAAGCCCAGCTTGTGTTGGGGCCCTGCGCCTGCAGGCCCTTAAAACCAGTGGCGGGCTCGCCTACACTCCGAGCGCAGTAATACATCTCGTTCTGGTCGTGTGGCGGGCGCTTGCCGTAAAACACCCCCCTTCTCAAGGTTGACCTCGGATCAGGTAGGAATACCCGCTGAACTTAA	GQ922536	SH235712.06FU		Saprotroph		Fungi	Ascomycota	Sordariomycetes	Sordariales	Lasiosphaeriaceae	Podospora	GQ922536	Podospora_fibrinocaudata
GL44550	IGJRWKL02GGQJK	CTAGACTCGTCATCGATGAAGAACGCTGCGAAATGCGATAAGTAATGTGAATTGCAGAATTCAGTGAATCATCGAATCTTTGAACGCACATTGCGCCCGCCAGTATTCTGGCGGGCATGCCTGTTCGAGCGTCATTTCAACCATCAAGCCCCCGGGCTTGCGCTGGGGCCCTGCGGCTGCCGCAGTCCCCGAAATTCAGTGGCGGGCTCGCCTCCACACCGAGCGCAGTAACGTATCTCGCTCCGGTCGTGCGGTGGGCTCTTGCCGTAAAACACCCCCATATCAAGGTTGACCTCGGATCAGGTAGGAATACCCGCTGAACTTAA	KC009090	SH222186.06FU		Saprotroph		Fungi	Ascomycota	Sordariomycetes	Sordariales	Lasiosphaeriaceae		GU055674	uncultured_Lasiosphaeriaceae
GL38084	ID1YYUI02JEFPG	CTAGACTCATCATCGATGAAGAACGCAGCGAAATGCGATAAGTAATGCGAATTGCAGATTTCAGTGAGTCATCGAATCTTTGAACGCACATTGCGCCCTCCAGTATCCTGGAGGGCATGCCTGTTCGAGCGTCACTACAACACTCAAGCTCTGCTTGGCGTTGGGGCCCTACGACCTAGCCGTCGTAAGCCCTTAAAATCAGTGGCGGGACCGCTGGGGACCCGGGCGAAGTAATGACTACAGCGCCAAGGGATATCTAGCCGGTCTCCTGTCGTAAAACGATTATTTAAATCTCAGTGTTGACCTCGGATCAGGTAGGAATACCCGCTGAACTTAA	AB278194	SH208187.06FU		Saprotroph		Fungi	Ascomycota	Sordariomycetes	Sordariales			JN889880	uncultured_fungus
GL02092	ID1YYUI01BM6XA	CTAGACTCGTCAACGATGAAGAACGCAGCGAAATGCGATAAGTAATGTGAATTGCAGAATTCAGTGAATCATCGAATCTTTGAACGCACATTGCGCCCGTTAGCATTCTAGCGGGCATGCCTGTTCGAGCGTCATTTCAACCCTCAGAACCCCTGTATTTTTGTACTGGGTGTGCTGGTGTTGGGGCCTCTGCGGCTGCCGCAGGCCCTGAAAAACAGTGGCGGGCTCCGCTATACTCCGAGCGCAGTAATATCTCTCGCTCAGGGCGTGTAGTGGGGATCTAGCCTTGTCTTATTACTTCAATGGTTGACCTCGGATCAGGTAGGAATACCCGCTGAACTTAA	KC460823	SH234960.06FU		Saprotroph		Fungi	Ascomycota	Sordariomycetes	Sordariales			JQ312957	uncultured_fungus
GL37822	IGJRWKL02HSGOA	CTAGACTCGTCACCGATGAAGAACGCAGCGAAATGCGATAAGTAATGCGAATTGCAGATTTCAGTGAGTCATCGAATCTTTGAACGCACATTGCGCCCTCCAGTATCCTGGAGGGCATGCCTGTTCGAGCGTCACTACAACACTCAAGCTCTGCTTGGCGTTGGGGCCCTACGACCTAGCCGTCGTAAGCCCTTAAAATCAGTGGCGGGACCGCTGGGGACCCGGGCGAAGTAATGACTACAGCGCCAAGGGATATCTAGCCGGTCTCCTGCCGTAAAACGATTATTTAAATCTCAGTGTTGACCTCGGATCAGGTAGGAATACCCGCTGAACTTAA	AB278194	SH208187.06FU		Saprotroph		Fungi	Ascomycota	Sordariomycetes	Sordariales			JN889880	uncultured_fungus
GL46588	ID1YYUI01A44T3	CTAGACTCGTCACCGATGAAGAACGCAGCGAAATGCGATAAGTAATGTGAATTGCAGAATTCAGTGAATCATCGAATCTTTGAACGCACATTGCGCCCTAAAGTATTCTTTTGGGCATGCCTGTTCGAGCGTCATTTCAACCCTCAAGCACTGCTTGGCGATGGGGCCTTACACCATGTAAGCCCTGAAATATAGTGGCGGGCCCGGTGTGGTCTCGAGCGTAGTAATACACCTCGCTTAGGGTGCCATGGCGGACCTCTGCCGTTAAACTCCCCACTCCAAAGGTTGACCTCGGATCAGGTAGGAATACCCGCTGAACTTAA	FM172902	SH219392.06FU		Saprotroph		Fungi	Ascomycota	Sordariomycetes	Sordariales			JN890112	uncultured_fungus
GL43002	IGJRWKL02IVWK5	TTAGTATTCTAGTGGGCATGCCTGTTCGAGCGTCATTTCAACCCCTAAGCACAGCTTATTGTTGGGACTCTACGGCTTCGTAGTTCCCCAAAGACATTGGCGGAGTGGCAGCAGTCCTCTGAGCGTAGTAATTCTTTATCTCGCTTTTGTTAGGCGCTGCCCCCCCGGCCGTAAAACCCCCATTTTTTCTGGTTGACCTCGGATCAGGTAGGAATACCCGCTGAACTTAA	KC806231	SH237075.06FU		Saprotroph		Fungi	Ascomycota	Sordariomycetes	Trichosphaeriales	Trichosphaeriaceae	Khuskia	KC178631	fungal_sp_SLM8
GL43525	ID03IXK02GEQHI	GCCCATTAGTATTCTAGTGGGCATGCCTGTTCGAGCGTCATTTCAACCCCTAAGCACAGCTTATTGTTGGGCGTCTACGTCTGTAGTGCCTCAAAGACATTGGCGGAGCGGCAGCAGTCCTCTGAGCGTAGTAATTCTTTATCTCGCTTCTGTTAGGCGCTGCCCCCCCGGCGTAAAACCCCCAATTTTTTCTGGTTGACCTCGGATCAGGTAGGAATACCCGCTGAACTTAA	JN687964	SH237076.06FU		Saprotroph		Fungi	Ascomycota	Sordariomycetes	Trichosphaeriales	Trichosphaeriaceae	Nigrospora	JX269361	uncultured_marine_fungus
GL41341	IJOVCJS01B05X3	TAGTATTCTAGTGGGCATGCCTGTTCGAGCGTCATTTCAACCCTTAAGCCTAGCTTAGTGTTGGGAATCTATCCGCAAGGATAGTTCCTCAAATCCAACGGCGGATCTGTGGTATCCTCTGAGCGTAGTAAATCTTTATCTCGCTTTTGTTAGGTGCCGCTGCTCTCAGCCGCTAAACCCCCCAATTTTTGTGGTTGACCTCGGATCAGGTAGGAATACCCGCTGAACTTAA	DQ534044	SH203268.06FU		Plant pathogen		Fungi	Ascomycota	Sordariomycetes	Xylariales	Amphisphaeriaceae	Monochaetia	GQ996169	fungal_sp_mh17005
GL30150	ID1YYUI02IZMW6	GTACCTAGATCGTCACCGATGAAGAACGCAGCGAAATGCGATAAGTAATGTGAATTGCAGAATTCAGTGAATCATCGAATCTTTGAACGCACATTGCGCCCATTAGTATTCTAGTGGGCATGCCTGTTCGAGCGTCATTTCAACCCTTAAGCCTAGCTTAGTGTTGGGAGCCTACTGCTTTTGCTAGCTGTAGCTCCTGAAATACAACGGCGGATCTGCGATATCCTCTGAGCGTAGTAAATTTTTATCTCGCTTTTGACTGGAGTTGCAGCGTCTTTGGCCGCTAAATCCCCCAATTTTTAATGGTTGACCTCGGATCAGGTAGGAATACCCGCTGAACTTAA	EU196750	SH210426.06FU		Plant pathogen		Fungi	Ascomycota	Sordariomycetes	Xylariales	Amphisphaeriaceae	Pestalotiopsis	KC506326	fungal_sp_AM2013
GL31986	ID1YYUI01AYZGA	TTCGAGCGTCATTTCAACCCTTAAGCCTAGCTTAGTGTTGGGAGCCTACTGCTTTTACTAGCTGTAGCTCCTGAAATACAACGGCGGATCTGCGATATCCTCTGAGCGTAGTAAATTTTTATCTCGCTTTTGACTGGAGTTGCAGCGTCTTTAGCCGCTAAATCCCCCAATTTTAATGGTTGACCTCGGATCAGGTAGGAATACCCGCTGAACTTAA	EU196750	SH210426.06FU		Plant pathogen		Fungi	Ascomycota	Sordariomycetes	Xylariales	Amphisphaeriaceae	Pestalotiopsis	JF439508	Pestalotiopsis_sp_F44
GL39257	ID1YYUI01EPGLJ	CTAGACTCGTCATCGATGAAGAACGCTGCGAAATGCGATAAGTAATGTGAATTGCAGAATTCAGTGAATCATCGAATCTTTGAACGCACATTGCGCCCATTAGTATTCTAGTGGGCATGCCTATTCGAGCGTCATTTCGACCATTAAGCCCTGTAGCTTAGCGTTGGGAGCCTACGGTTGTAGCGTAGCTCCTCAAAGTCAGTGGCGGAGTTATGGCGTACTCTGAGCGTAGTAAATCTTTTCTAGCTTCTGTAGTCGCCCTAGCTGCCTGCCGTAAAACCCCCTATATTTCTAGTGGTTGACCTCGGATTAGGTAGGAATACCCGCTGAACTTAA	AY354245	SH235793.06FU		Saprotroph		Fungi	Ascomycota	Sordariomycetes	Xylariales	Xylariaceae	Annulohypoxylon	UDB015467	Hypoxylon_multiforme
GL37742	IGJRWKL02GHWH1	ATGCCTGTTCGAGCGTCATTTCAACCCCCAAGCCCTATTTGCTTGACGTTGGGAGTTTACGGAGACGTAATTCCTCAAATATAGTGGCGGAGCTAGGTCGTGCTCTAAGCGTAGTAACCACACTCTCGCTTCTGCAGCCGGCCTAGGTCTTGCCGTAAAACCCCCTATATTTTTTTTACTGGTTGACCTCGGATCAGGTAGGAATACCCGCTGAACTTAA	JX421711	SH227122.06FU		Saprotroph		Fungi	Ascomycota	Sordariomycetes	Xylariales	Xylariaceae	Biscogniauxia	JF773620	Obolarina_sp_CHTAF7
GL31399	IGJRWKL02IVQAX	CTAGACTCGTCACCGATGAAGAACGCAGCGAAATGCGATAAGTAATGTGAATTGCAGAATTCAGTGAATCATCGAATCTTTGAACGCACATTGCGCCCGCTAGTATTCTAGCGGGCATGCCTGTCCGAGCGTCATTTCAACCCTTAAGCCTAGCTGCTTAGTGTTGGGAATCTGCCCTGCATCTGCAGCGCAGTTCCTTAAAGTAATCGGCGGAGTTAGGGCATACTCTAAGCGTAGTAATATTTCTTCTCGCTTCTGTAGTTGTCCTGGCGGCTTGCCGTTAAACCCCTATATTTCTAGTGGTTGACCTCGGATCAGGTAGGAGTACCCGCTGAACTTAA	JX421716	SH224037.06FU		Saprotroph		Fungi	Ascomycota	Sordariomycetes	Xylariales	Xylariaceae	Daldinia	JQ760949	Sordariomycetes_sp_genotype_328
GL38092	IGJRWKL02JTOOP	TTTGAACGCACATTGCGCCCATTAGTATTCTAGTGGGCATGCCTATTCGAGCGTCATTTCAACCCTTAAGCCTCAGTAGCTTAGCGTTGGGAATCTACAGGTTACAGCGTAGTTCCTTAAAGGTAGTGGCGGAGTTAGAGCACACTCTAAGCGTAGTACTTGTTTCTCGCTTCTGGTAGTGGCTTTGGCGGCCGGCCGTGAAACCCCCTATATTTCTAATGGTTGACCTCGGATTAGGTAGGAATACCCGCTGAACTTAA	KC968923	SH236019.06FU		Saprotroph		Fungi	Ascomycota	Sordariomycetes	Xylariales	Xylariaceae	Hypoxylon	JQ009316	Hypoxylon_submonticulosum
GL39168	IGJRWKL02JQMBB	CTAGACTCGTCATCGATGAAGAACGCAGCGAAATGCGATAAGTAATGTGAATTGCAGAATTCAGTGAATCATCGAATCTTTGAACGCATATTGCGCCCACTAGTATTCTGGTGGGCATGCCTATTCGAGCGTCATTTCAACCCTTAAGCCCTGTTGCTTAGTGTTAGGAGCCTACTACCTTACGGCGTAGCTCCCTAAAGGTAGTGGCGGTGTTAGGTACACTCGTAGCGTAGTAATTCTTTTTCTCGCTCCTGCTGTGTACCTAGGGCCTGCCGTAAAACCCCTATACTTCTAGTGGTTGACCTCGGATTAGGTAGGAATACCCGCTGAACTTAA	AY787708	SH213591.06FU		Saprotroph		Fungi	Ascomycota	Sordariomycetes	Xylariales	Xylariaceae	Hypoxylon	GQ906958	Xylariales_sp_JP28_3
GL42097	IGJRWKL02IKBSX	CTAGACTCGGCAACGATGAAGAACGCAGCGAAATGCGATAAGTAATGTGAATTGCAGAATTCAGTGAATCATCGAATCTTTGAACGCACATTGCGCCCATTAGCATTCTAGTGGGCATGCCTGTTCGAGCGTCATTTCACCACTTAAGCCCTGTTGCTTAGCGTTGGGAGCCTACGGCATAGCCCGTAGCTCCTTAAAGTGATTGGCGGAGTTGGTTCTCACTCTAAGCGTAGTAACTATATCTCGCTTCTGTAGTAGTTCCGGCCCCTGCCGTAAAACCCCTTATACAAAGGTTGACCTCGGATCAGGTAGGAATACCCGCTGAACTTAA	FJ917287	SH227005.06FU		Saprotroph		Fungi	Ascomycota	Sordariomycetes	Xylariales	Xylariaceae	Muscodor	JQ760944	Sordariomycetes_sp_genotype_264
GL33904	IGJRWKL02FWYWO	CTAGACTCGTCAACGATGAAGAACGCAGCGAAATGCGATAAGTAATGTGAATTGCAGAATTCAGTGAATCATCGAATCTTTGAACGCACATTGCGCCCACTAGTATTCTGGTGGGCATGCCTGTTCGAGCGTCATTTCAACCCTTAAGCCCCTGTTGCTTAGCGTTAGGAGCCTACCGGAACTCTCTGGTAGCTCCCCAAAGTCAGTGGCGGAGCCGGTTCGCACTCCAGACGTAGTAGCTTTTACACGTCGCCTGTAGCGCGGGCCGGTCCCCTGCCGTAAAACACCCCAATTTTTATAGGTTGACCTCGGATCAGGTAGGAATACCCGCTGAACTTAA	EU686030	SH241717.06FU		Saprotroph		Fungi	Ascomycota	Sordariomycetes	Xylariales	Xylariaceae	Nemania	JQ761983	Sordariomycetes_sp_genotype_183
GL41463	IGJRWKL02G4RCX	CTAGACTCGTCACCGATGAAGAACGCAGCGAAATGCGATAAGTAATGTGAATTGCAGAATTCAGTGAATCATCGAATCTTTGAACGCACATTGCGCCCATTAGTATTCTAGTGGGCATGCCTGTTCGAGCGTCATTAAGTCCATTAAGCCTAGTTGCTTAGCGTTGGGAGCATTACCGCATGGTAACTCCTTAAAGTCAGTGGCAGGGTTACGGTACACTCTAAGCGTAGTAGATTTCTTTCTCGCTTCTGTGGTGGCCGCGGCCGTTGCCATAAACCTATAATTTTTTATTGGTTGACCTCGGATCAGGTAGGAATACCCGCTGAACTTAA	AB670711	SH217873.06FU		Saprotroph		Fungi	Ascomycota	Sordariomycetes	Xylariales	Xylariaceae	Virgaria	JQ762000	Sordariomycetes_sp_genotype_621
GL38563	ID1YYUI01CSX69	CTAGATCGTCATCGATGAAGAACGTAGCGAAATGCGATAAGTAATGTGAATTGCAGAGTTCAGTGAATCATCGAATCTTTGAACGCACATTGCGCCCACTAGTATTCTGGTGGGCATGCCTGTTCGAGCGTCATTTCAACCCCTAAGCCTTAGTTGTTTAGCGTTGGGAGTTTGCGGTAACGCAACTCTTTAAATTTCGTGGTAGGGCTCGCGTCACCTTGAAGTGTAGTAATTTTCTTCTCGCTTTTAGAAGGCGTTCGCGCGGCACAGCCAAGTAAAACCTTATATTATCAAGTGGTTGACCTCGGATCAGGTAGGAGTACCCGCTGAACTTAA	EU686104	SH218862.06FU		Saprotroph		Fungi	Ascomycota	Sordariomycetes	Xylariales	Xylariaceae		EU686107	fungal_endophyte_sp_ECD_2008
GL29776	IGJRWKL02FRD64	CTAGACTCGTCAACGATGAAGAACGCAGCGAAATGCGATAAGTAATGTGAATTGCAGAATTCAGTGAATCATCGAATCTTTGAACGCACATTGCGCCCATTAGTATTCTAGTGGGCATGCCTGTTCGAGCGTCATTTCAACCCTTAAGCCTAGCTTAGTGTTGGGAGTCTACTGGTGGTAATTCGTTACCTTGTAGTTCCTAAAATGAAACGGCGGATCTGCAGTATCCTCTGAGCGTAGTAAATTTTTATCTCGCTTTTGTTTAGGTGCTGTGGCTCTTGCCGCTAAACCCCCAATTTTCAATGGTTGACCTCGGATCAGGTAGGAATACCCGCTGAACTTAA	EU680554	SH222076.06FU				Fungi	Ascomycota	Sordariomycetes	Xylariales			GQ996140	fungal_sp_mh32602
GL34124	ID1YYUI01DUD5Y	CTAGACTCGTCATCGATGAAGAACGCTGCGAAATGCGATAAGTAATGTGAATTGCAGAATTCAGTGAATCATCGAATCTTTGAACGCACATTGCGCCCATTAGTATTCTAGTGGGCATGCCTGTTCGAGCGTCATTTCAACCCTTAAGCCTAGCTTAGTATTGGGAATCTACCGAGCGGAGCTACCCTGTAGCTACCCTGTAGCTCCTTAAAGCCAGCGGCGGATTTGTAGTATCCTCTGAGCGTAGTAATCTTTATCTCGCTTTTGTTAGGTGCTGTAATTCTAGCCGTTAAACCTCTAATTTTTAATGGTTGACCTCGGATCAGGTAGGAATACCCGCTGAACTTAA	AF502894	SH234382.06FU				Fungi	Ascomycota	Sordariomycetes	Xylariales			JX243908	Sordariomycetes_sp_ODKB8
GL41444	IGJRWKL02IK3M3	CTAGACTCGTCAACGATGAAGAACGCAGCGAAATGCGATAAGTAATGTGAATTGCAGAATTCAGTGAATCATCGAATCTTTGAACGCACATTGCGCCTGACAGTATTCTGTTAGGCATGCCTGTTCGAGCGTCATTTCAACCCTCAAGCCCTATTTGCTTGACGTTGGGAGTTTACGGAGACGTAATTCCTTAAATATAGTGGCGGAGCCGGGTCGTGCTCTGGGCGTAGTAACCAAACTCTCGCCTCTGTAGCCGGCTCGGGTCTTGCCGTAAAACCCCCTATATTCTTCTGGTTGACCTCGGATCAGGTAGGAATACCCGCTGAACTTAA	JX298925	SH227125.06FU				Fungi	Ascomycota	Sordariomycetes	Xylariales			JQ247198	Biscogniauxia_maritima
GL43156	IGJRWKL02JPQBT	CTAGACTCGTCATCGATGAAGAACGCTGCGAAATGCGATAAGTAATGTGAATTGCAGAATTCAGTGAATCATCGAATCTTTGAACGCACATTGCGCCCATCAGTATTCTGGTGGGCATGCCTGTTCGAGCGTCATTTCAACCCTTAAGCCTAGCTTAGTGTTGGGAATCTGCTGTACTGCAGTTCCTTAAAGACAGTGGCGGAGCGGCGGTAGTCCTCTGAGCGTAGTAATTTATTTCTCGCTTTTGTCAGGCTCTGTCCTCCCGCCATAAAACCCCCAATTTTTTAGTGGTTGACCTCGGATCAGGTAGGAATACCCGCTGAACTTAA	JF440582	SH233379.06FU		Saprotroph		Fungi	Ascomycota	Sordariomycetes		Apiosporaceae	Apiospora	KC339241	Arthrinium_sacchari
GL30057	IGJRWKL02HNIBD	CTAGACTCGTCAACGATGAAGAACGCAGCGAAATGCGATAAGTAATGTGAATTGCAGAATTCAGTGAATCATCGAATCTTTGAACGCACATTGCGCCCGCCAGTATTCTGGCGGGCATGCCTGTTCGAGCGTCATTTCAACCACTCAGGCCCTGGTGCCTGGCGTCGGGGTATTTCTGTAACAAGAAATCCCCTAGAATCAGTGGCGGACCCGCCGCGGCTCCGAGCGTAGTAGTAAAATATCTCGCTATGGAGGTCCGTGGGGGGCTAACCGGCCGTAAAACCTCTTCTTTACTGAAGAACTTCTCGAGGTTGACCTCGGATCAGGTAGGAATACCCGCTGAACTTAA	AY754945	SH212485.06FU				Fungi	Ascomycota	Sordariomycetes				DQ227290	sordariomycete_sp_pgp_hsf
GL31057	IGJRWKL02GI6KC	CTAGACTCGTCACCGATGAAGAACGCAGCGAAATGCGATAAGTAATGTGAATTGCAGAATTCAGTGAATCATCGAATCTTTGAACGCACATTGCGCCCACCAGTATTCTGGTGGGCATGCCTGTTCGAGCGTCATTTCAACCCTTAAGCCCCGGTTGCTTAGCGTTGGGAGCCTACCGGACCCTGTCCCGTAGCTCCCCAAAGTCAGTGGCGGAGCCGGTTTAACACTCCAGACGTAGTAGCTTGTACACATCGCCTGTAGCCTAAGCCCGGCGCCCTGCCGTAAAACACCCCCCAATGTATAGGTTGACCTCGGATCAGGTAGGAATACCCGCTGAACTTAA	FN392305	SH230327.06FU				Fungi	Ascomycota	Sordariomycetes				JQ761966	Sordariomycetes_sp_genotype_184
GL27415	IGJRWKL02HYUBF	TGCTCGGTGTTGGGGCGCTAGGTCTCCCAGAGGCCTAGGCCCCCAAGTAGCAGTGCGCGGTCCGGCTGCGGGCCCCGGGTACAGTAACTTCACTGTTGAGATGCCCTGGGAGCCGCTGGCTGGGTCAGCCGTAAAACCCCCGACATAGGCCTCTCTGCCCGCCCCCGGCGGGGAGGGAGACCGCCTAATGTTGACCTCGGATCAGGTAGGACTACCCGCTGAACTTAA	HQ021813	SH210782.06FU				Fungi	Ascomycota	Sordariomycetes				GU055743	uncultured_Sordariomycetes
GL30942	IGJRWKL02HHSH1	CTAGACTCGTCACCGATGAAGAACGCAGCGAAATGCGATAAGTAATGTGAATTGCAGAATTCAGTGAATCATCGAATCTTTGAACGCACATTGCGCCCACCAGTATTCTGGTGGGCATGCCTGTTCGAGCGTCATTTCAACCCTTAAGCCCTAGTTGCTTAGCGTTGGGAGCCTACCGGACCCTGTCCCGTAGCTCCCCAAAGTCAGTGGCGGAGCCGGTTTAACACTCCAGACGTAGTAGCTTTTACACATCGCCTGTAGCCTAAGCCCGGCGCCCTGCCGTAAAACACCCCCCAATGTATAGGTTGACCTCGGATCAGGTAGGAATACCCGCTGAACTTAA	FN392305	SH230327.06FU				Fungi	Ascomycota	Sordariomycetes				JQ762010	Sordariomycetes_sp_genotype_516
GL34095	ID1YYUI01EOOTP	CTAGACTCGTCACCGATGAAGAACGCAGCGAAATGCGATAAGTAATGTGAATTGCAGAATTCAGTGAATCATCGAATCTTTGAACGCACATTGCGCCCGCCAGTATTCTGGCGGGCATGCCTGTTCGAGCGTCATTTCAACCACTCAGGCCCTGGTGCCTGGCGTCGGGGTATTTCTGTAACAAGAAATCCCCTAGAATCAGTGGCGGACCAGCCGCGGCTCCGAGCGTAGTAGTAAAATATCTCGCTATGGAGGTCCGTGGGGGGCTAACCGGCCGTAAAACCTCTTCTTTACTGAAGAACTTCTCAAGGTTGACCTCGGATCAGGTAGGAATACCCGCTGAACTTAA	AY754945	SH212485.06FU				Fungi	Ascomycota	Sordariomycetes				DQ227290	sordariomycete_sp_pgp_hsf
GL39277	ID1YYUI01A6E8V	CTAGACTCGTCATCGATGAAGAACGTAGCGAAATGCGATAAGTAATGTGAATTGCAGAATTCAGTGAATCATCGAATCTTTGAACGCACGTTGCGCCCGCCAGTATTCTGGCGGGCATGCCTGTTCGAGCGTCATTTCGACCCCTCAAGCCCGGCTTGGTGTTGGGGCCCCTACGTGCGCCGTAGGCCCCGAACTGCAGTGGTGGGCTCGCCGCGATCCCGAGCGTAGTAGCGTTACCTCGCTCAGGGCGCGCGGCGGGCGCCGGCCGTGAAAGAAAACCACTTTTCACCCCAAAAGGTTGACCTCGGATCAGGTAGGAATACCCGCTGAACTTAA	JQ761545	SH198082.06FU				Fungi	Ascomycota	Sordariomycetes				JQ761967	Sordariomycetes_sp_genotype_558
GL43295	IJOVCJS01DZ230	CAGATCGTCATCGATGAAGAACGCAGCGAAATGCGATAAGTAATGTGAATTGCAGAATTCAGTGAATCATCGAATCTTTGAACGCACATTGCGCCCGCTAGTATTCTGGCGGGCATGCCTGTCCGAGCGTCATTTCAACCATCAAGCCCCCGGGCTTGCGTTGGGGCACCGCGGCCGCCGCGGTCCCTGAAAACCAGTGGCGGGCTCGCTGTCACTCCGGGCGCAGTACTATATCTCGCTCTGGATCGTGCGGCGGGTGCCGGCCGTTAAAAACCCCCCTTTCATAAGGTTGACCTCGGATCAGGTAGGAATACCCGCTGAACTTAA	HM122853	SH222187.06FU				Fungi	Ascomycota	Sordariomycetes				HM123260	fungal_sp_ARIZ_AZ0538
GL12323	ID1YYUI01C76ZI	TAGACTCGTCAACGATGAAGAACGCAGCGAAATGCGATAAGTAATGTGAATTGCAGAATTCAGTGAATCATCGAATCTTTGAACGCACATTGCGCCCTCTGGTATTCCGGAGGGCATGCCTGTTTGAGTGTCATTAATCTCTCCCAGATCATCGTTTGTTCGGTGGTCTGTGGGTGTTGGGATCTGCGAACCTGTCACAAGGGGCGCTCTCCTCAAATGCATTGGTGCGGCCCGCCGCCCGGTAACAACAACGTTCTAGGTTCGTCCAACTCGTTGTTCATGCTGGTTGCAATCTTGGTTGCTGCACCTAAAGCCTGCCTCGTGCCTCGTGCTCCTGGCAACACCTCATTTATTGACCTCAGATCAGGTAGGAATACGCGCTGAACTTAA	AF492078	SH211018.06FU		Plant pathogen	Yeast	Fungi	Ascomycota	Taphrinomycetes	Taphrinales	Taphrinaceae	Taphrina	HQ433051	uncultured_Ascomycota
GL21503	IGJRWKL02FQCM1	CTAGACTCGTCATCGATGAAGAACGCTGCGAAATGCGATAAGTAATGTGAATTGCAGAATTCAGTGAATCATCGAATCTTTGAACGCACATTGCGCCCTCTGGTATTCCGGAGGGCATGCCTGTTTGAGTGTCATTAACTTCTCACAAAACCTTCTGGTTTCTGTTGATGTTGGGAGTTGCGTTTCCTTGTGAGACGCTCTCCTCAAATGCATTGGTGCGGCCTGCCGCCCGGTTACACAACGTTCTAGGTTCGTCCAACTCGTTGCTAAATCGGTGCACCATTTGGTGCTGCACCTAAAGCCCGCCTTGTGCCTTGTGCTCTTGGCTTATCTTATTTATTGACCTCAGATCAGGTAGGAATACGCGCTGAACTTAA	AF492083	SH211012.06FU		Plant pathogen	Yeast	Fungi	Ascomycota	Taphrinomycetes	Taphrinales	Taphrinaceae	Taphrina	AF492083	Taphrina_carnea
GL23232	ID1YYUI01EX3D8	CTAGACTCGTCATCGATGAAGAACGCTGCGAAATGCGATAAGTAATGTGAATTGCAGAATTCAGTGAATCATCGAATCTTTGAACGCACATTGCGCCCTCTGGTATTCCGGAGGGCATGCCTGTTTGAGTGTCATTAATCTCTCACAAGACCTTCTGGTCTTGTCGATGTTGGGAGCTGCGACCCCCCAGGGGGACGCTCTCCTCAAATGCATTGGTGCGGCCCGCCGCCCGGTTACACAACGTTCTAGGTTCGTCCAACTCGTTGAAGCCGGCGCAAATCTGGCGCTGCACCTTAAGCCCGCCCTGAGCCTCGAGCTCCTGGCATAACTTCATTTATTGACCTCAGATCAGGTAGGAATACGCGCTGAACTTAA	KC966071	SH219277.06FU		Plant pathogen	Yeast	Fungi	Ascomycota	Taphrinomycetes	Taphrinales	Taphrinaceae	Taphrina	JF495236	uncultured_Taphrina
GL23760	ID1YYUI01AW9FL	CTAGACTCGTCACCGATGAAGAACGCAGCGAAATGCGATAAGTAATGTGAATTGCAGAATTCAGTGAATCATCGAATCTTTGAACGCACATTGCGCCCTCTGGTATTCCGGAGGGCATGCCTGTTTGAGTGTCATTAATCTCTCACAACCACCTGTGGTATTGTGATGTTGGGAGCTGCGCTGTGCTTGCACGACGCTCTCCTCAAATGCATTGGTGCGGCCTGCCGCCCGGTTACACAACGTTCTAGGTTCGTCCAACTCGTTGCTACTCCGGTGCAATCATGGTGCTGCACCTAAAGCCCGTCTCGTGCCTTGTGCTCTTGACATCTTCATTTATTGACCTCAGATCAGGTAGGAATACGCGCTGAACTTAA	JF495183	SH211021.06FU		Plant pathogen	Yeast	Fungi	Ascomycota	Taphrinomycetes	Taphrinales	Taphrinaceae	Taphrina	JF495183	uncultured_Taphrina
GL08309	ID1YYUI01CQT5V	GTCAGTGAACACCCTCCGGCCCCCGGTTTTTGCGAACCGGCTGGCGCGGGCCCATGGCGCGGGGATAGAGGCCACCGCGTTTCGGCGCGTCGAGGCATTCCCCCGCTTAAACGCGGAGAAAAGCTAGCGGGCAGGTGCCCCCATCGCGATGACTCGTAGATTTATCTTCCGTCGTCCAGCGTGAGGGAAGCCGCCGCCATAAAAAACGAGGGGAGCCCCCCGCGGGCACCCCTCCAGAATCTTGACCTCAGATCGGACGAGGATACCCGCTGAACTTAA	JN889943	SH205002.06FU				Fungi	Ascomycota					DQ421287	uncultured_soil_fungus
GL41024	ID1YYUI01DEWMN	CTAGACTCGTCACCGATGAAGAACGCAGCGAAATGCGATAAGTAATGTGAATTGCAGAATTCAGTGAATCATCGAATCTTTGAACGCACATTGCGCCCGCCAGTATTCTGGCGGGCATGCCTGTTCGAGCGTCATTTCAACCATCAAGCCCCGCGCTTGTGTTGGGGACCTGCGGCTGCCGCAGGCCCTGAAAACCAGTGGCGGGCTCGCTGTCACACCGAGCGTAGTAGATTTCTCATCTCGCTCAGGGCGTGCTGCGGGTTCCGGCCGTAAAAAAGCCTTATTTTACCCAAGGTTGACCTCGGATCAGGTAGGAAGACCCGCTGAACTTAA	GU212419	SH234921.06FU				Fungi	Ascomycota					EU144368	root_associated_fungal_sp_AP_186
GL44668	ID1YYUI01EUW0M	CTAGACTCGTCATCGATGAAGAACGCTGCGAAATGCGATAAGTAATGTGAATTGCAGAATTCAGTGAATCATCGAATCTTTGAACGCACATTGCGCCCCTTGGTATTCCGGGGGGCATGCCTGTTCGAGCGTCATTTCAACCCTCAGGCTCCGGCTTGGTCTTGGGCTCTGCCGGTTACGGCTTGCCTTAAAATCAGTGGCGGTGGCAGTCGAGCTCTACGCGTAGTAGCTATATTTTCGCGATTGAGTCTCGCTGTGCGCTGGCCAGCAACCCCTAATTTTCTATGGTTGACCTCGGATCAGGTAGGGATACCCGCTGAACTTAA	JN032489	SH209230.06FU				Fungi	Ascomycota					JQ312779	uncultured_fungus
GL49458	ID03IXK02GAVDM	CTAGACTCGTCACCGATGAAGAACGCAGCGAAATGCGATAAGTAATGTGAATTGCAGAATTCAGTGAATCATCGAATCTTTGAACGCACATTGCGCCCCTTGGTATTCCGAGGGGCACGCCTGTTCGAGCGTCATTTAAACAATCAAGCCTTGCTTGGTCTTGGGCGTGGTCGATCGACCCGTCCGTAACTCGTTGGCGGTGCAGTCCGGCTTCAAGCGTAGCAAACATCTCGCTTCAGGAGTCCGCGGCGGTACCCGCCAGGTAACTTAAACCTAAAGTTTGACCTCGGATCAGGTGAGGATACCCGCTGAACTTAA	KF060186	SH240055.06FU				Fungi	Ascomycota					JQ312817	uncultured_fungus
GL11269	IGJRWKL02H6TXK	CTAGACTCGTCATCGATGAAGAACGCTGCGAAATGCGATAAGTAATGTGAATTGCAGAATTCAGTGAATCATCGAATCTTTGAACGCATCTTGCGCTCCTTGGTATTCCGAGGAGCATGCCTGTTTGAGTGTCATTAAATTCTCAACTCTCTTATACTGTTTGGTAAAAGAGAGCTTGGACTGTGGAGGCTTGCTGGCCACTCGTTTGAGGTCAGCTCCTCTGAAATGCATTAGCGGAACCGTTTGCGATCTGCCACAAGTGTGATAAATTATCTGCACTGGCGAGGGGATTGCTCTCAGTAATGTTCAGCTTCTAATTGTCTCTACTTTGTGAGACTACTTTTGAATGCTTGACCTCAAATCAGGTAGGACTACCCGCTGAACTTAA	KF114475	SH237696.06FU		Saprotroph		Fungi	Basidiomycota	Agaricomycetes	Agaricales	Agaricaceae	Agaricus	UDB017953	Agaricus_essettei
GL13307	ID03IXK02IZFGL	CTAGACTCGTCATCGATGAAGAACGCTGCGAAATGCGATAAGTAATGTGAATTGCAGAATTCAGTGAATCATCGAATCTTTGAACGCACCTTGCGCTCCTTGGTATTCCGAGGAGCATGCCTGTTTGAGTGTCATTAAATTCTCAATCTTTCAGGTTTCTTAACGAAATCAGTCAGATTGGATGTGGAGGTATTTGCAGGCTTCTCAGTCTGCTCCTCTTAAATGCATTAGCGGAACCTAACATTGTCCAATTTTTGGTGTGATAATTATCTACATCATGAATGCGGTACAAACTTTTGTAGGTTCGGCTTCTAACAGTCCATTCACTTGGACAGCTCTTGACAATTTGACCTCAAATCAGGTAGGACTACCCGCTGAACTTTAA	UDB011408	SH232659.06FU		Saprotroph		Fungi	Basidiomycota	Agaricomycetes	Agaricales	Agaricaceae	Cystodermella	UDB018030	Cystodermella_adnatifolia
GL18132	IGJRWKL02FH9LY	CTAGACTCGTCACCGATGAAGAACGCAGCGAAATGCGATAAGTAATGTGAATTGCAGAATTCAGTGAATCATCGAATCTTTGAACGCACCTTGCGCTCCTTGGTATTCCGAGGAGCATGCCTGTTTGAGTGTCATTAAATTCTCAACCCCACTAGCTTTTGTGAGCTATGCCGGGGCTTGGATGTTGGGAGTTTGCGGGCCTCTTTACTAGGTCGGCTCTCCTGAAATACATTAGCGGAACCGTTTGCAGTCCCGTCACTAGTGTGATAATTATCTACACTGTGATGACTGCTCTCTGACTAGTTCAGCTGCTAATCGTCCACTGTGGACAATCATTAATGAACTTCTTGACCTCAAATCAGGTAGGACTACCCGCTGAACTTAA	DQ112557	SH191491.06FU		Saprotroph		Fungi	Basidiomycota	Agaricomycetes	Agaricales	Agaricaceae	Lycoperdon	UDB011830	Lycoperdon_pyriforme
GL21733	ID1YYUI01DCW0Y	CTAGACTCGTCATCGATGAAGAACGCTGCGAAATGCGATAAGTAATGTGAATTGCAGAATTCAGTGAATCATCGAATCTTTGAACGCACCTTGCGCTCCTTGGTATTCCGAGGAGCATGCCTGTTTGAGTGTCATTAAATTCTCAATCTCTACAACTTTGTGTTGTCTAGATCGGAAGTGGGGGTTTATTGTGTGGAATCTAATTCCTCACTCCCCTTAAATGCATTAGCTGGAATGCCTCTGCATATCTGACTATCAGTGTGATAATTATCTATACTGTAGTTGTTGCATGAGGGTATCTGCTTCATAAATCGTCGCAAGACAATTCTATATGACCATCTTGACCTCAAATCAGGTAGGACTACCCGCTGAACTTAA	JX968225	SH193115.06FU		Saprotroph		Fungi	Basidiomycota	Agaricomycetes	Agaricales	Bolbitiaceae	Conocybe	JF907832	Conocybe_velutipes
GL13294	IJOVCJS01DOGAD	CTAGACTCGTCAACGATGAAGAACGCAGCGAATTGCGATATGTAATGTGAATTGCAGAATTCAGTGAATCATCGAATCTTTGAACGCACCTTGCACCCTCTGGCATTCCGGAGGGTATGCCTGTTTGAGTGTCATTAATCTCTCAACACATGAAACTTTGTCTTCTTGTGCTTGGATATTGAAGGTTTTGCTGGCGGCAAACAACTGTCAGCTCCTTTTAAATGTATTAGCAGAGCAGTATAGGACTGGCCTCGGTTTGATAAGAAACTTTATCTATGCTGTCGCTGGGTTTTCCTCTTTGTGCTCAGCTTCAAATTGTCTTTGGACTGTCTCTTGAGGCAACAAAAATCTCTATTGATCGACCTCAAATCAGGTAGGACTACCCGCTGAACTTAA	GU234148	SH201748.06FU		Saprotroph		Fungi	Basidiomycota	Agaricomycetes	Agaricales	Clavariaceae	Clavaria	HQ212072	uncultured_Clavaria
GL22709	ID1YYUI01BNG1D	CTAGACTCGTCATCGATGAAGAACGCTGCGAATAGCGATATGTAATGTGAATTGCAGATCTCAGTGAATCATCGAATCTTTGAACGCACCTTGCACCCTTTGGTATTCCGAAGGGTATGCCTGTTTGAGTGTCATTATCATCCTCAACTGGAATATTTGTTTATTCCAGCTTGGACTTGGAGGTCTTGCTGGCTGCAAAGTCAGCTCCTCTTAAATGCATTAGCGGTACAAGCAGAATCGGCTTCGGTTTGATAGAAATATCTATGCTGTCGCTGAGGAACAATATGTGCAGCTTCCAATTGTCTTCGGACTGTCTTTCACAAGGCATATATTGACTCTTGACCTCAAATCAGGTAGGACTACCCGCTGAACTTAA	EU118634	SH212466.06FU		Saprotroph		Fungi	Basidiomycota	Agaricomycetes	Agaricales	Clavariaceae	Hyphodontiella	EU118634	Hyphodontiella_multiseptata
GL16109	ID1YYUI01BODC0	CTAGACTCGTCATCGATGAAGAACGCAGCGAATTGCGATATGTAATGTGAATTGCAGAATTCCAGTGAATCATCGAATCTTTGAACGCACCTTGCACCCTTTGGTATTCCAGAGGGTATGCCTGTTTGAGTGTCATTAAATTCTCAATGTTATATTCTTTATTGAGTATTACACTTGGATGTTGAAGGCTGCTGATGGTCAACACCAGCTCCTTTTAAATGTATTAGCAGAATCTGCCAGACCTGCCTCGGTTTGATAATCATTGTTATCATCTATCTGTCGCAGCGGGAGCGTGTATTCAGCTTCTAATTGTCTCTTTACCGAGACTGTCTCCTAGAGGCATACTTATGACTCTTGACCTCAAATCAGGTAGGACTACCCGCTGAACTTAA	AY969832	SH226590.06FU		Saprotroph		Fungi	Basidiomycota	Agaricomycetes	Agaricales	Clavariaceae		AF033344	Clavicorona_taxophila
GL17972	IGJRWKL02I1BP1	CTAGACTCGTCATCGATGAAGAACGTAGCGAATTGCGATATGTAATGTGAATTGCAGAATTCAGTGAATCATCGAATCTTTGAACGCACCTTGCGCCCTTTGGTATTCCGAAGGGCATGCCTGTTTGAGTATCATTAACATCTCACTCTTGAATTCCTTGTGAAGTCAAGATGTGGACTTTGGAGGTTTTTGAAGGCCATCACTGGTCAGCTCCTCTTAAATGCATTAGCGGAACTCTATGCAGTTTCAGCCTCGGTTTGATAATCCTATCTATGCTGTCGCTGATGACTGTGCTGTTTGGCTTACAATTGTCTTCGGACTGTCACTTTTGTGGCATAAACTTTAAGCTTGATCTCAAATCAGGTAGGACTACCCGCTGAACTTAA	GU083065	SH218067.06FU		Saprotroph		Fungi	Basidiomycota	Agaricomycetes	Agaricales	Clavariaceae		GU328581	uncultured_Basidiomycota
GL27517	ID03IXK02IPUN1	TTTTTGTAAGCTTGGACTTTGGAGGAATTTTGCCGGCATCACTGTCAGCTCCTCTTAAATGCATTAGCGGAACTTTATTAAGGACCAGCTTTGGTTTGATAATCCTATCTATGCCGTCGCTGTGGACTTTGCCTGTTCGGCTTCTAATGGTCTTCGGACTGTCTCTCTAATGAGGCATACACTTTTAAGCTTGACCTCAAATCAGGTAGGACTACCCGCTGAACTTAA	HQ211947	SH203501.06FU		Saprotroph		Fungi	Basidiomycota	Agaricomycetes	Agaricales	Clavariaceae		HQ212101	uncultured_Ramariopsis|Agaricales|
GL28994	ID03IXK02IQL0V	CTAGACTCGTCAACGATGAAGAACGCAGCGAAATGCGATAAGTAATGTGAATTGCAGATTTTCAGTGAATCATCGAATCTTTGAACGCACCTTGCGCTCCTTGGTATTCCGAGGAGCATGCCTGTTTGAGTGTCATTAATATATCAACCTTCTCTTGTTTGAGTTGTTTGGATGTGGGGGTTTGCTGGACTCTTAAATGAATTCAGCTCCCCTGAAATGCATTAGCAGAACAACCTGTTCATTGGCGTGATAATTATCTATGCTATTGAATGTGAGGGCAGTTCAGCTTTCTAATCGTCCTTGGACAATTTATCATTAATGTGACCTCAAATCAGGTAGGACTACCCGCTGAACTTAA	DQ481679	SH232833.06FU	cortinarius	EcM		Fungi	Basidiomycota	Agaricomycetes	Agaricales	Cortinariaceae	Cortinarius	FN669184	Cortinarius_sp_P064|Cortinarius|
GL15623	ID03IXK02HV8YN	CTAGACTCGTCATCGATGAAGAACGCTGCGAAATGCGATAAGTAATGTGAATTGCAGAATTCAGTGAATCATCGAATCTTTGAACGCACCTTGCGCTCCTTGGTATTCCGAGGAGCATGCCTGTTTGAGTGTCATTAATATATCAACCTCTTTAAATTTTGAGAGAGTGTTTGGATGTGGGGGTGTTATTTTGCTGGCCTTCTCCAAGGTCAGCTCCCCTGAAATGTATTAGCGGAACAATTTGTTGACCGTTCATTGGTGTGATAGCATATCTACGCTATTGACGTAAAGCAAGTTCAGCTTATAACAGTCCATTGACTTGGACAATTCTCTATTTATTAATGTGACCTCAAATCAGGTAGGACTACCCGCTGAACTTAA	DQ295081	SH191803.06FU	cortinarius	EcM		Fungi	Basidiomycota	Agaricomycetes	Agaricales	Cortinariaceae	Cortinarius	UDB001027	Cortinarius_collinitus
GL18685	ID03IXK02F5Y9R	TGAACGCACCTTGCGCTCCTTGGTATTCCGAGGAGCATGCCTGTTTGAGTGTCATTAATATATCAACCTCTTCAGCTTTTTGCAAGTTGAGTGTTGGATGTGGGGGTATTTTTTGCTGGACTCTATACAATTTGAGGTCAGCTCCCCTAAAATGCATTAGCGAAACTATTTGTTTACTGCTCATTGGTGTGATAACTATCTACGCTATTGACGGTGAAGCATGTTTAGCTTCTAACAGTCCATTAACTTGGACAATCTCTTATTAATGTGACCTCAAATCAGGTAGGACTACCCGCTGAACTTAA	UDB002204	SH218198.06FU	cortinarius	EcM		Fungi	Basidiomycota	Agaricomycetes	Agaricales	Cortinariaceae	Cortinarius	UDB002204	Cortinarius_obtusus
GL20327	IJOVCJS01A8UTU	CTAGACTCGTCATCGATGAAGAACGTGGCGAAATGCGATAAGTAATGTGAATTGCAGAATTCAGTGAATCATCGAATCTTTGAACGCACCTTGCGCTCCTTGGTATTCCGAGGAGCATGCCTGTTTGAGTGTCATTAATATATCAACCTCTTCAGCTTTTGCTTGTTTGAGTGTTGGATGTGGGGGTGTCCTTTGTTGGCTTCTATAAAGTCAGCTCCCCTCAAATGTATTAGCAGAATAATTTGTTAATCCTGTTCATTGGTGTGATAATTATCTACGCTATTGACAGGGAAAGCAGTTCAGCTTCTAATAGTCCATTGACTTGGACAAAATTTTCATTAATGTGACCTCAAATCAGGTAGGACTACCCGCTGAACTTAA	EU821696	SH191849.06FU	cortinarius	EcM		Fungi	Basidiomycota	Agaricomycetes	Agaricales	Cortinariaceae	Cortinarius	UDB001058	Cortinarius_pluvius
GL21396	ID1YYUI01ATZDY	CTAGACTCGTCACCGATGAAGAACGCAGCGAAATGCGATAAGTAATGTGAATTGCAGAATTCAGTGAATCATCGAATCTTTGAACGCACCTTGCGCTCCTTGGTATTCCGAGGAGCATGCCTGTTTGAGTGTCATTAAATATATATCAACCCAACTCTTGTTGAGTGGTTTGGATGTGGAGGGTTTTGCTGGCTGCTTAAAAGGTGCCAGCTCCTCTGAAATGCATTAGTGGAACAACCTGTCCATTCATTGGTGTGATAACTATCTACGCTGTTGAATGTGAGGCAGTTCAGCTATCTAACAGTCCTTGGACAAACTTATCATTTAATGTGACCTCAAATCAGGTAGGACTACCCGCTGAACTTAA	UDB001329	SH221779.06FU	cortinarius	EcM		Fungi	Basidiomycota	Agaricomycetes	Agaricales	Cortinariaceae	Cortinarius	HQ021915	uncultured_Cortinarius|Cortinarius|
GL22287	ID1YYUI01ALOSV	CTAGACTCGTCATCGATGAAGAACGTAGCGAAATGCGATAAGTAATGTGAATTGCAGAATTCAGTGAATCATCGAATCTTTGAACGCACCTTGCGCTCCTTGGTATTCCGAGGAGCATGCCTGTTTGAGTGTCATTAATATAATCAACCTCTTCAGCTTTTGCTTGTTGAGTGTTGGATGTGGGGGTAACTTTTTGCTGGCCTCTCTGAGGTCAGCTCCCCTGAAATGTATTAGCGGAATAATTTGTGGACCGTTCATTGGTGTGATAACTATCTACGCTATTGACGTGAAGCAATTCTGCTTCTAACAGTCCATTGACTTGGACAAATTTCATTAACTTGACCTCAAATCAGGTAGGACTACCCGCTGAACTTAA	FJ039634	SH220380.06FU	cortinarius	EcM		Fungi	Basidiomycota	Agaricomycetes	Agaricales	Cortinariaceae	Cortinarius	UDB018238	Cortinarius_multiformis
GL23066	IJOVCJS01A19BZ	CTAGACTCGTCAACGATGAAGAACGCAGCGAAATGCGATAAGTAATGTGAATTGCAGAATTCAGTGAATCATCGAATCTTTGAACGCACCTTGCGCTCCTTGGTATTCCGAGGAGCATGCCTGTTTGAGTGTCATTAATATATCAACCTCCTCAACTTGTGTTGAGCGTTGGATGCGGGGGTTCTTTCTTTGCTGGCTTCACGGTCAGCTCCCCTGAAATGCATTAGCGGAGCAACCTGTTCACTGTTCATTGGCGTGATAACTATCTACGCTGCTTGTTGACAGTGAAGCAAGTTCAGCTTCTAACAGTCCATTAAATTGGACAAATTTTTATTAATGTGACCTCAAATCAGGTAGGACTACCCGCTGAACTTAA	KC842443	SH191824.06FU	cortinarius	EcM		Fungi	Basidiomycota	Agaricomycetes	Agaricales	Cortinariaceae	Cortinarius	JX029933	Cortinarius_sp_H19
GL23069	ID03IXK02FVGZK	CTAGGACTCGTCAACGATGAAGAACGCAGCGAAATGCGATAAGTAATGTGAATTGCAGAATTCAGTGAATCATCGAATCTTTGAACGCACCTTGCGCTCCTTGGTATTCCGAGGAGCATGCCTGTTTGAGTGTCATTAATATATATATCAAACCCTCTCTTGTCGAGTGGTTTGGATGTGGGGGTTTGCTGGCCTCTTGAAGGGTTCAGCTCCTCTGAAATGCATTAGCAGAACAACAACCTGTTCATTGGTGTGATAACTATCTACGCTATTGAATGTGAGGGTAAAAGTTCAGCTTTCTAACCGTCCATGGACAATTTATCATTAATGTGACCTCAAATCAGGTAGGACTACCCGCTGAACTTAA	UDB001047	SH232832.06FU	cortinarius	EcM		Fungi	Basidiomycota	Agaricomycetes	Agaricales	Cortinariaceae	Cortinarius	UDB016128	Cortinarius_laniger
GL24285	ID03IXK02GQHMC	CTAGACTCGTCACCGATGAAGAACGCAGCGAAATGCGATAAGTAATGTGAATTGCAGAATTCAGTGAATCATCGAATCTTTGAACGCACCTTGCGCTCCTTGGTATTCCGAGGAGCATGCCTGTTTGAGTGTCATTAATATTATATATCAAACCCTCTTTTTCTGGAGTGGTTTGGATGTGGGGGGTTGCTGGCCTCTTGAAAGGGGTCAGCTCTCCTGAAATGCATTAGCGGAACAACCTGTTCGTTCATTGGTGTGATAACTATCTACGCTATTGAATGGTGAAAGGCAGTTCAGCTTCCTAACTGTCTTTTGGACAATTTAACAATCTATATGTGACCTCAAATCAGGTAGGACTACCCGCTGAACTTAA	UDB001309	SH204058.06FU	cortinarius	EcM		Fungi	Basidiomycota	Agaricomycetes	Agaricales	Cortinariaceae	Cortinarius	FJ039682	Cortinarius_clarobrunneus|Cortinarius|
GL25174	ID1YYUI01AQ6SM	CTAGACTCGTCACCGATGAAGAACGCAGCGAAATGCGATAAGTAATGTGAATTGCAGAATTCAGTGAATCATCGGATCTTTGAACGCACCTTGCGCTCCTTGGTATTCCGAGGAGCATGCCTGTTTGAGTGTCATTAATATATCAACCCTCTTTGTTGAGTGTTGGATGTGGGGGTTTCTTTTTGCTGGACTCTCTCGAGGTCAGCTCCCCTGAAATATATTAGCAAAACAATTTGTTTACTGCTCATTGGTGTGATACATATCTACGCTATTGATGGTAAAGCACAGTTTAGCTTCTAAAAGTTCATTGACTTGGACAATCTTTTATTAATGTGACCTCAAATCAGGTAGGACTACCCGCTGAACTTAA	UDB001002	SH191940.06FU	cortinarius	EcM		Fungi	Basidiomycota	Agaricomycetes	Agaricales	Cortinariaceae	Cortinarius	UDB001002	Cortinarius_acutus
GL25235	ID03IXK02G4CFB	CTAGACTCGTCAACGATGAAGAACGCAGCGAAATGCGATAAGTAATGTGAATTGCAGAATTCAGTGAATCATCGAATCTTTGAACGCACCTTGCGCTCCTTGGTATTCCGAGGAGCATGCCTGTTTGAGTGTCATTAATATTATATATCAAACCCTCTTTTGTTGAGTGGTTTGGATGTGGGGTTGCTGGCCTCTTGAAGGGGTCAGCTTCCCTGAAATGCATTAGCAGAACAGCCTGTTCGTTCCATTGGTGTGATAACTATCTACGCTATTGAATGATGAAGGCAAGTTCAGCTTTCTAACCGTCTTTGGACAATTTATCATCTATATGTGACCTCAAATCAGGTAGGACTACCCGCTGAACTTAA	UDB001339	SH204054.06FU	cortinarius	EcM		Fungi	Basidiomycota	Agaricomycetes	Agaricales	Cortinariaceae	Cortinarius	UDB001019	Cortinarius_brunneus
GL25390	IJOVCJS01COGGY	CTAGACTCGTCAACGATGAAGAACGCAGCGAAATGCGATAAGTAATGTGAATTGCAGAATTCAGTGAATCATCGAATCTTTGAACGCACCTTGCGCTCCTTGGTATTCCGAGGAGCATGCCTGTTTGAGTGTCATTAATATATATATCAACCTTCTCTTTGTTGAGTGGCTTGGATGTGGGGGTTTGCTGGCGGCCTCTTAGGAGGGTTCAGCTCCCCTGAAATGCATTAGCAGAACAAACCCTGTTCATTGGTGTGATAACTATCTACGCTATTGAATGTGAGGGGGCAGTTCAGCTTTCTAACGGTCCTTTGGGACAGATTCATCATTAATGTGACCTCAAATCAGGTAGGACTACCCGCTGAACTTAA	AF481375	sequence missing from global key	cortinarius	EcM		Fungi	Basidiomycota	Agaricomycetes	Agaricales	Cortinariaceae	Cortinarius	AF481376	ectomycorrhizal_root_tip_(Cortinarius)_243_Ny3C_51|Cortinarius|
GL25398	IJOVCJS01CGFQM	CTAGACTCGTCATCGATGAAGAACGCTGCGAAATGCGATAAGTAATGTGAATTGCAGAATTCAGTGAATCATCGAATCTTTGAACGCACCTTGCGCTCCTTGGTATTCCGAGGAGCATGCCTGTTTGAGTGTCATTAATATATATATATATCAACCTTCTCTTTGTTGAGTGGTGTTGGATGTGGGGGTTTGCTGGTCTCTTTAAAGGTTTCAGCTCCCCTGAAATGCATTAGCAGAACAACCTGTTCATTGGCGTGATAACTATCTATGCTATTGAATGTGAAGGGCAGTTCAGCTTTCTAACAGTCTTTGGACAATTCATCATTAATGTGACCTCAAATCAGGTAGGACTACCCGCTGAACTTAA	UDB000676	SH221802.06FU	cortinarius	EcM		Fungi	Basidiomycota	Agaricomycetes	Agaricales	Cortinariaceae	Cortinarius	JQ711911	Cortinarius_sp_16_RT_2012
GL25780	IJOVCJS01BEM6L	CTAGACTCGTCACCGATGAAGAACGCAGCGAAATGCGATAAGTAATGTGAATTGCAGAATTCAGTGAATCATCGAATCTTTGAACGCACCTTGCGCTCCTTGGTATTCCGAGGAGCATGCCTGTTTGAGTGTCATTAATATATATATCAAACCCTCTTTGTTGAGTGGCTTGGATGTGGAGGTTTTTTGCTGGCCTCTTAAAAGGTCCAGCTCCTCTGAAATGCATTAGCAGAACAACAGCCTGTTCATTCATTGGTGTGATAACTATCTACGCTATTGAATGTGGGGCAGTTCAGCTTCCTAACAGTCCTTTGGACAATTCATCATTTTATGTGACCTCAAATCAGGTAGGACTACCCGCTGAACTTAA	UDB015386	SH232855.06FU	cortinarius	EcM		Fungi	Basidiomycota	Agaricomycetes	Agaricales	Cortinariaceae	Cortinarius	UDB015386	Cortinarius_pholideus
GL25805	IJOVCJS01ECNU6	CTAGACTCGTCATCGATGAAGAACGTGGCGAAATGCGATAAGTAATGTGAATTGCAGAATTCAGTGAATCATCGAATCTTTGAACGCACCTTGCGCTCCTTGGTATTCCGAGGAGCATGCCTGTTTGAGTGTCATTAATATATATATCAACCTTCTCATTGTTGAGTGGATTGGATGTGGGGGGTTTGCTGGCCTCTTTAATGGGTTCAGCTCCTCTGAAATGCATTAGCAGAACAACCTGTTCATTGGTGTGATAACTATCTACGCTATTGAATGTGAGGGGCAGTTCAGCTTTCTAACAGTCCTTGGACAATTAATCATTTATGTGACCTCAAATCAGGTAGGACTACCCGCTGAACTTAA	EU693242	SH221793.06FU	cortinarius	EcM		Fungi	Basidiomycota	Agaricomycetes	Agaricales	Cortinariaceae	Cortinarius	UDB000741	Cortinarius_testaceofolius
GL27305	IJOVCJS01CDWSO	CTAGACTCGTCACCGATGAAGAACGCAGCGAAATGCGATAAGTAATGTGAATTGCAGAATTCAGTGAATCATCGAATCTTTGAACGCACCTTGCGCTCCTTGGTATTCCGAGGAGCATGCCTGTTTGAGTGTCATTAATATATCAACCCTCTCATGTTGAGTGAGTAGTGGTTTGGATGTGGGGGGTTTGCTGGCCTTGTAAAAAGGTTCAGCTCCCCTGAAATGCATTAGCAGAACAACCTGTTCATTGGTGTGATAAACTATCTACGCTATTGAATGTGAGGGCAGTTCAGCTTTCTAACAGTCCCTTGGACAATTCTTCATTTATGTGATCTCAAATCAGGTAGGACTACCCGCTGAACTTAA	FJ039566	SH221813.06FU	cortinarius	EcM		Fungi	Basidiomycota	Agaricomycetes	Agaricales	Cortinariaceae	Cortinarius	GQ159903	Cortinarius_rigens|Cortinarius|
GL27852	IJOVCJS01ESPAY	CTAGACTCGTCATCGATGAAGAACGCTGCGAAATGCGATAAGTAATGTGAATTGCAGAAAATTCAGTGAATCATCGAATCTTTGAACGCACCTTGCGCTCCTTGGTATTCCGAGGAGCATGCCTGTTCGAGTGTCATTAATATATATATCAACCCTCCTCTTTTTGAGTGGTTTGGATGTGGGGGTTTGCTGGCCTCTTAGAGGGTTCAGCTCCCCTGAAATGCATCAGCGGAACAACCTGTTCATTGGTGTGATAACTATCTACGCTAATTTGAATGTGAAGGGCAGTTCGGCTTTCTAACCGTCCTTGGACAATTTCATCATTAATGTGACCTCAAATCAGGCAGGACTACCCGCTGAACTTAA	UDB000671	SH232866.06FU	cortinarius	EcM		Fungi	Basidiomycota	Agaricomycetes	Agaricales	Cortinariaceae	Cortinarius	JF907945	Cortinarius_angelesianus
GL28222	ID03IXK02G5QRR	CTAGACTCGTCATCGATGAAGAACGTAGCGAAATGCGATAAGTAATGTGAATTGCAGAATTCAGTGAATCATCGAATCTTTGAACGCACCTTGCACTCCTTGGTATTCCGAGGAGCATGCCTGTTTGAGTGTCATTAATATATATATCAACCTTCTCTTGTTGGAGTGGTTTGGATGTGGGGGTTTGCTGGCCTCTTAAAAGGTTCAGCTCCCTTGAAATGCATTAGCAGAACGGACCTGTTCATTGGTGTGATAACTATCTACGCTATTGAATGTGAGGGGATGTTCAGCTTTCTAACTGTCCTTGGACAATTTATCATTTTATGTGACCTCAAATCAGGTAGGACTACCCGCTGAACTTAA	DQ481693	SH204057.06FU	cortinarius	EcM		Fungi	Basidiomycota	Agaricomycetes	Agaricales	Cortinariaceae	Cortinarius	UDB018353	Cortinarius
GL28956	ID03IXK02GYIKL	CTAGACTCGTCATCGATGAAGAACGCTGCGAAATGCGATAAGTAATGTGAATTGCAGAATTCAGTGAATCATCGAATCTTTGAACGCACCTTGCGCTCCTTGGTATTCCGAGGAGCATGCCTGTTTGAGTGTCATTAATATATCAACCTTCTCTTGTTGAGTGGTTTGGATGTGGGGGTTTGCTGGCCTTGTAAAGGGTTTCAGCTCCCCTGAAATGCATTAGCAGAACAACCTGTTCATTGGTGTGATAACTATCTACGCTATTGAATGTGAAGGGCCGTTCAGCTTTCTAACAGTCCTTGATTGGACAATTTATCATTAATGTGACCTCAAATCAGGTAGGACTACCCGCTGAACTTAA	EU259284	SH221801.06FU	cortinarius	EcM		Fungi	Basidiomycota	Agaricomycetes	Agaricales	Cortinariaceae	Cortinarius	UDB016162	Cortinarius_brunneifolius
GL28966	IJOVCJS01APQMY	ACGTATCTAGACTCGTCATCGATGAAGAACGCTGCGAAATGCGATAAGTAATGTGAATTGCAGAATTCAGTGAATCATCGAATCTTTGAACGCACCTTGCGCTCCTTGGTATTCCGAGGAGCATGCCTGTTTGAGTGTCATTAATATATATCAACCTTCTCATTTATGAGTGGTTTGGATGTGGGGGTTTGCTGGCCCCTTAAATGAGTTCAGCTCCTCTGAAATGCATTAGCAGAACAACCTTGTTCATTGGCGTGATAACTATCTACGCTATTGAATGTGAGGGACAGTTCAGCTTTCTAACAGTCCTTGGACAACTTATCATTAATGTGACCTCAAATCAGGTAGGACTACCCGCTGAACTTAA	UDB008566	SH221774.06FU	cortinarius	EcM		Fungi	Basidiomycota	Agaricomycetes	Agaricales	Cortinariaceae	Cortinarius	UDB002252	Cortinarius_biformis
GL28995	IGJRWKL02H3T6S	CTAGACTCGTCATCGATGAAGAACGCTGCGAAATGCGATAAGTAATGTGAATTGCAGAATTCAGTGAATCATCGAATCTTTGAACGCACCTTGCGCTCCTTGGTATTCCGAGGAGCATGCCTGTTTGAGTGTCATTAATATATCAACCTTCTCTTGTTTGAGTTGTTTGGATGTGGGGGTTTGCTGGACTCTTAATGAATTCAGCTCCCCTGAAATGCATTAGCAGAACAACCTGTTCATTGGCGTGATAATTATCTATGCTATTGAATGTGAGGGCAGTTCAGCTTTCTAATCGTCCTTGGACAATTTATCATTAATGTGACCTCAAATCAGGTAGGACTACCCGCTGAACTTAA	DQ481679	SH232833.06FU	cortinarius	EcM		Fungi	Basidiomycota	Agaricomycetes	Agaricales	Cortinariaceae	Cortinarius	JQ711826	Cortinarius_sp_8_RT_2012
GL34744	IGJRWKL02H8DXH	TCTTTTGTTGGAGTGGTTTGGATGTGAGGGTTTGCTGGATTCCTTAAAAGAATTCAGCTCCCTTGAAATGCATTAGCAGAATAACCTGTTCATTGGTGTGATAACTATCTACACTATTGAATGCAAGGGCCAGTTCAGCTTTCTAACAGTCCTTGGACAATTTATCATTTATGTGACCTCAAATCAGGTAGGACTACCCGCTGAACTTAA	FJ039572	SH232919.06FU	cortinarius	EcM		Fungi	Basidiomycota	Agaricomycetes	Agaricales	Cortinariaceae	Cortinarius	GQ159921	Cortinarius_venustus|Cortinarius|
GL35432	ID03IXK02J3K0U	GGATGTGGGGGGTATTTCTTTTGCTGGTCTCTCTTTGAGGTCAGCTCCCCTAAAATATATTAGCGGGACAATTTGTTGACCGTTCATTGGTGTGATAACTATCTACGCTATTGACGTGAGGCAGGTTCAGCTTCTAACAGTCCATTGACTTGGACAAATCTTTCATTAATGTGACCTCAAATCAGGTAGGACTACCCGCTGAACTTAA	DQ481834	SH192049.06FU	cortinarius	EcM		Fungi	Basidiomycota	Agaricomycetes	Agaricales	Cortinariaceae	Cortinarius	JQ791126	uncultured_Cortinarius
GL37865	ID03IXK02HH50K	GGGGTCTTTTTTGCTGGTTTCTCTATTTGAGGTCAGCTCCCCTGAAATATATTAGCAGAACAAATTTGTGGATTGTTCATTGGTGTGATAATTATCTACGCTATTGACGTGAAGCAAGGTTCAGCTTCTAACAGTCCATTGACTTGGACAAACCCTTCATTAATGTGACCTCAAATCAGGTAGGACTACCCGCTGAACTTAA	EU660942	SH191874.06FU	cortinarius	EcM		Fungi	Basidiomycota	Agaricomycetes	Agaricales	Cortinariaceae	Cortinarius	FJ157123	Cortinarius_pinophilus|Cortinarius|
GL40333	ID1YYUI01BMLLA	ATCTTTTTTTGCTGGACTCTCTCTTGAGGTCAGCTCCCCTAAAATACATTAGCAAAACAATTTGTTTACTGCTCATTGGTGTGATAACTATCTACGCTGTTGACGGTAAATCACGGTTTCGCTTCTAACAGTCCATTGACTTGGACAATTTTTATCAATGTGACCTCAAATCAGGTAGGATTACCCGCTGAACTTAA	FJ475620	SH191821.06FU	cortinarius	EcM		Fungi	Basidiomycota	Agaricomycetes	Agaricales	Cortinariaceae	Cortinarius	FJ475620	uncultured_Cortinariaceae|Cortinarius|
GL41726	ID03IXK02GPYIZ	GGGGCTTTTTGCTGGTCTTTTTAAAGAAGTCAGCTCCCCTAAAATTTATTAGCGGAACAATTTGTTGACCGTTCATTGGTGTGATAATTATCTACGCTATTAACGTGAGGCAGTTCAGCTTCTAACAGTCCATTGACTTGGACAGTTTTTCATTAATGTGACCTCAAATCAGGTAGGACTACCCGCTGAACTTAA	UDB018663	SH227833.06FU	cortinarius	EcM		Fungi	Basidiomycota	Agaricomycetes	Agaricales	Cortinariaceae	Cortinarius	UDB015920	cf._C._anomali_(Cortinarius)
GL25121	ID1YYUI01BDTUS	ATAGACTCGTCACCGATGAAGAACGCAGCGAAATGCGATAAGTAATGTGAATTGCAGAATTCAGTGAATCATCGAATCTTTGAACGCACCTTGCGCTCCTTGGTATTCCGAGGAGCATGCCTGTTTGAGTGTCATTAAATTCTCAACTATACAAGTTTTTATAACCTGCATAGCTTGGATCTTGGGATTTGCGGGCTTTCACAAGTCGGCTATCCTTAAATGTATTAGCAGAGCTTTTGCCGCTAATCATTGGTGTGATAATTATCTACGCCATTGAGAGGTGACATACTGAGGCTTAGCTTCTAATCGTCTTCACAGACAACTTTTGACAATCTGACCTCAAATCAGGTAGGATTACCCGCTGAACTTAA	FJ770395	SH205041.06FU		Saprotroph		Fungi	Basidiomycota	Agaricomycetes	Agaricales	Entolomataceae	Clitopilus	GU328568	uncultured_Basidiomycota
GL00707	ID03IXK02IX57K	TCTTTGGTATGATAATTATCTATATCATTGAGACACAGCTTCTCCACTTCAATGGGATTTCAGGCTCTGCTTGGATTTTTATCTCCAAGTGTTCGATTCAACCGATCTGAAGCACTAGCTTAGGCACAGACGTTAACTCGTTTGATGGTGTTGAATACTTCAGGTTGACGAAGCGCGGCGTTCTCAGGAGCGCTCACGAGAGCAAGCAGCATCATCTGTGATGTGTGCACTGTCATATTCCTGTACCTACCCTAGCTACTATGTGGCTTTTATGGGTCTGGTCTAACCATGACCTGAACATATCCTTAGTGGGAGAATCTTGCTTCTAATATAGTTCCTATGAACATCTTGACAATTTGACCTCAAATCAGGTAGGACTACCCGCTGAACTTAA	UDB008029	SH241227.06FU	entoloma	EcM		Fungi	Basidiomycota	Agaricomycetes	Agaricales	Entolomataceae	Entoloma	AM902088	uncultured_Basidiomycota|Entoloma|
GL21452	ID03IXK02JRDM8	CTAGACTCGTCATCGATGAAGAACGCTGCGAAATGCGATAAGTAATGTGAATTGCAGAATTCAGTGAATCATCGAATCTTTGAACGCACCTTGCGCTCCTTGGTATTCCGAGGAGCATGCCTGTTTGAGTGTCGTGAAATTCTCAACCTCTCTGGTTTTTATAAGCCAGTTAGGCTTGGATATTGGAGGTTGCTGGCTTCTCAGAAGTCAGCTCTTCTTAAATATATTAGCAAAGTCTTTGCTGACCATCTTTGGTATGATAATTATCTATATCATTGAGAATCAGCTTCCGTCTCGGAAGGACCTTTGCTTCTAATGGTCTATATAGACAACTTGACAATTTGACCTCAAATCAGGTAGGACTACCCGCTGAACTTAA	JF908003	SH200905.06FU		Saprotroph		Fungi	Basidiomycota	Agaricomycetes	Agaricales	Entolomataceae	Entoloma	JX316693	uncultured_fungus
GL21677	ID1YYUI01AYEZN	TAGACTCGTCAACGATGAAGAACGCAGCGAAATGCGATAAGTAATGTGAATTGCAGAATTCAGTGAATCATCGAATCTTTGAACGCACCTTGCGCTCCTTGGTATTCCGAGGAGCATGCCTGTTTGAGTGTCATGAAATTCTCAACCTTTCTGGTTTTTATTAACTAGTCTGGCTTGGATTGTTGGAGTTGCTGGCTTCTAAGAAGTCAGCTCTTCTTAAATACATTAGCAAAATCTTTGCTGACCATCCCTTTGGTGTGATAATTATCTACGTCATTGAGAATCAGCTTTTGTAGATTTAGCTTCTAATCGTCTTTTCTTGAGACAACTTATGACAATTTGACCTCAAATCAGGTAGGACTACCCGCTGAACTTAA	UDB015647	SH200895.06FU		Saprotroph		Fungi	Basidiomycota	Agaricomycetes	Agaricales	Entolomataceae	Entoloma	UDB015647	Entoloma_nitidum
GL22383	ID03IXK02IK9KC	CTAGACTCGTCAACGATGAAGAACGCAGCGAAATGCGATAAGTAATGTGAATTGCAGAATTCAGTGAATCATCGAATCTTTGAACGCACCTTGCGCTCCTTGGTATTCCGAGGAGCATGCCTGTTTGAGTGTCATGAAATTCTCAACCCTTCTAGTTTTCATTAGCTAGTCTGGCTTGGATTATGGGGGTTGCTGGCTTCTAAGAAGTCGGCTCTCCTTAAATGCATTAGCAAAATCTTTGCTGACCATCCCTTGGTGTGATAATTATCTACGCCATTGAGAATCAGCTTTTATAGATTTAGCTTCTAATAGTCCTTTCTAGGGACAACTTATGAAAATTTGACCTCAAATCAGGTAGGACTACCCGCTGAACTTAA	JF908005	SH200897.06FU		Saprotroph		Fungi	Basidiomycota	Agaricomycetes	Agaricales	Entolomataceae	Entoloma	UDB017923	Entoloma_turbidum
GL15871	ID03IXK02H7TLH	CTAGACTCGTCATCGATGAAGAACGCTGCGAAATGCGATAAGTAATGTGAATTGCAGAATTCAGTGAATCATCGAATCTTTGAACGCACCTTGCGCTCCTTGGTATTCCGAGGAGCATGCCTGTTTGAGTGTCATTAAATTCTCAACCTTTATCAACAAAAGTTGATAATGGCTTGGATATGGGGGTTTATTTTGCTGGCTTCTTTACAGATGGTCAGCTCCCCTTAAATGCATTAGCCGGTGCCCCGCGTGGACTGTCTATTGGTGTGATAATTATCTACGCCGTGGACATCTGCAATCATATGGGTTTGCACTGCTTCCAACTGTCTGTTGAATCAGACAATACATGACAATTTGACCTCAAATCAGGTAGGACTACCCGCTGAACTTAA	UDB003173	SH190720.06FU	hebeloma-alnicola	EcM		Fungi	Basidiomycota	Agaricomycetes	Agaricales	Hebelomataceae	Hebeloma	JX316553	uncultured_fungus
GL42983	IGJRWKL02JWEAK	CTAGACTCGTCATCGATGAAGAACGCTGCGAAATGCGATAAGTAATGTGAATTGCAGAATTCAGTGAATCATCGAATCTTTGAACGCACCTTGCGCTCCTTGGTATTCCGAGGAGCATGCCTGTTTGAGTGTCATTAAATTATCAACCTCTTCAAGAGGCTTGGATTTGGAGTGTTGCTGGCTTGTTGTTGGCTCCTCTTAAATGAATTAAGCTTGTGTGTAGGCTCTGGTTTGATAATATCTATGCCATCGCTGTAATGCAAAACAACCTTGAAATTTGACCTCAAATCAGGTAGGACTACCCGCTGAACTTAA	UDB015719	SH210922.06FU	hygrophorus	EcM		Fungi	Basidiomycota	Agaricomycetes	Agaricales	Hygrophoraceae	Hygrophorus	JN889823	uncultured_fungus
GL10721	ID1YYUI01CX1A8	GTCATCGATGAAGAACGCTGCGAAATGCGATAAGTAATGTGAATTGCAGAATTCAGTGAATCATCGAATCTTTGAACGCATCTTGCGCTCCTTGGTATTCCGAGGAGCATGCCTGTTTGAGTGTCATTTCAAGTTCTCAACCGCATCAATTTCTCATTGATGTGGCTTGGATATGGGGGATTGCAGGCTTCTGTCAAAGGAGGTCGGCTCCCCTGAAAAACATTAGTGGTATCTGAGCAGAAGAAACTACTACAGGTGTGATAATTATCTATGCCTTTCAGTATGCTGCATAAAAACAGACTGCACTGCTTCTAACTAGTGAAAACCTCTCTACAAAGGAGGGGCCACGTTTGATGAATTTGACCTCAAATCAGGTAGGACTACCCGCTGAACTTAA	AM882793	SH240211.06FU	inocybe	EcM		Fungi	Basidiomycota	Agaricomycetes	Agaricales	Inocybaceae	Inocybe	AM882793	Inocybe_leiocephala|Inocybe_leiocephala|
GL17663	IGJRWKL02FP2IU	CTAGACTCGTCATCGATGAAGAACGCTGCGAAATGCGATAAGTAATGTGAATTGCAGAATTCAGTGAATCATCGAATCTTTGAACGCATCTTGCGCTCCTTGGTATTCCGAGGAGCATGCCTGTTTGAGTGTCATTAAGCTCTCAACTGCACTAGTTTTATCTAGTTGTAGCTTGGATGTGGGGGTTTTGTTTTTGCAGGCTTCAGAATAATGAAGTCGGCTCCCCTAAAATGTATTAGTGGTCTCTGAGCAGAGAAAACGGTGTGATAATTATCTATGCCTTAGTACTTTGCATGAAAAGATTGTATCGCTTCTAACACAAAGTGACTCCACTTTATGTTTGACAAATTTGACCTCAAATCAGGTAGGACTACCCGCTGAACTTAA	AM882799	SH209879.06FU	inocybe	EcM		Fungi	Basidiomycota	Agaricomycetes	Agaricales	Inocybaceae	Inocybe	AB701391	uncultured_mycorrhizal_fungus
GL24487	IJOVCJS01EF0BX	CTAGACTCGTCATCGATGAAGAACGCTGCGAAATGCGATAAGTAATGTGAATTGCAGAATTCAGTGAATCATCGAATCTTTGAACGCATCTTGCGCTCCTTGGTATTCCGAGGAGCATGCCTGTTTGAGTGTCATTTAACTTCTCAACCAACATCAAATGGTGTTGGCTTGGATGTGGGGGTTGTTTTTGCAGGCTTTTTCTTGTAGAAGGTCGGCTCCCCTGAAATGGATTAGTGGTATCTGAGGCTACTACTGTGGGTGTGATAACTATCTATGCCTTTGGTATGCCGCATGAACAGATTACACTGCTTCTAACAAAACAAATTTTGATAAATTTGACCTCAAATCAGGTAGGACTACCCGCTGAACTTAA	UDB000627	SH201881.06FU	inocybe	EcM		Fungi	Basidiomycota	Agaricomycetes	Agaricales	Inocybaceae	Inocybe	JF908124	Inocybe_flocculosa
GL24643	ID1YYUI01BXGJP	CCTGAACGCCGACCACACCTAGTATCTAGACTCGTCATCGATGAAGAACGCAGCGAAATGCGATAAGTAATGTGAATTGCAGAATTCAGTGAATCATCGAATCTTTGAACGCATCTTGCGCTCCTTGGTATTCCGAGGAGCATGCCTGTTTGAGTGTCATTTAAAACTTCTCAACCATTTGGAGTCTCTCCGGGTGGCTTGGAAATGGGGGATGTGCAGGCCAGCAATGGTCTGCTCCCCTGAAATGAATTAGTGGCATCTGAGCAGAGACTACCACAGGTGTGATAACTATTGATCAATGCCTTGGTATATACTGCAGGTTGTTGCTGCTTCTAATGTAAATAACCCATTGACAAACTTGACCTCAAATCAGGTAGGATTACCCGCTGAACTTAA	AM882924	SH219574.06FU	inocybe	EcM		Fungi	Basidiomycota	Agaricomycetes	Agaricales	Inocybaceae	Inocybe	FN610981	uncultured_fungus
GL37235	ID1YYUI01C8W0V	TGTGGGGGTTTTATTTTGCTGGCTCCTATTAAATGAGGTCAGCTCCCCTGAAACTTATTAGCGGTATCTGAGCAGAGAGACCTACTACAGGTGTGATAAATTATCTATGCCTTGGTCATACTGCATGAACAGATTGTGCTGCTCCCAGTGAATCATTTGACAATTTTGACCTCAAATCAGGTAGGACTACCCGCTGAACTTAA	HQ604433	SH200567.06FU	inocybe	EcM		Fungi	Basidiomycota	Agaricomycetes	Agaricales	Inocybaceae	Inocybe	UDB015348	Inocybe_lacera_var._lacera
GL25604	ID1YYUI01DL8VY	CTAGACTCGTCATCGATGAAGAACGCTGCGAAATGCGATAAGTAATGTGAATTGCNGAATTCAGTGAATCATCGAATCTTTGAACGCATCTTGCGCTCCTTGGTATTCCGAGGAGCATGCCTGTTTGAGTGTCATCAAGTTCTCAACCACCATGTTTTTGTGTGTGGCTTGGATTTGGGGGTATCTGTTGTGCAGGCTTTATCAAGTCAGCTCCCCTGAAAAGCATTAGTGGTATCTGAGCAAAAACTACTATAGGTGTGATAACTATCTATGCCTTGGTATATAATGCATGAACAGACTACACTGCTTGCAAACTTTGAAATTGACCAATTTGACCTCAAATCAGGTAGGACTACCCGCTGAACTTAA	HM069431	SH218287.06FU	inocybe	EcM		Fungi	Basidiomycota	Agaricomycetes	Agaricales	Inocybaceae		HM196017	uncultured_Inocybe
GL40459	ID03IXK02GM7UM	TTTTATTTTGCAGGCTTCTTCTGTCTAGGAGGAAATCAGCTCCCCTGAAATAGATTAGTAGTATATCTGAGCCTACTACAAAGGTGTGATAAATTATCTATGCCTTTTCATAGTATGGACGACTGCTTCTAACAAGTGGAAACACCTTTTATGACAAATTTGACCTCAAATCAGGTAGGACTACCCGCTGAACTTAA	EF218769	SH228242.06FU	inocybe	EcM		Fungi	Basidiomycota	Agaricomycetes	Agaricales	Inocybaceae		EF218769	uncultured_Inocybe
GL21910	IJOVCJS01B2A40	CTAGACTCGTCATCGATGAAGAACGCTGCGAAATGCGATAAGTAATGTGAATTGCAGAATTCAGTGAATCATCGAATCTTTGAACGCACCTTGCGCTCCTTGGTATTCCGAGGAGCATGCCTGTTTGAGTGTCATTAAATTCTCAACCTTTTCAACTTTTATTAGTTGATCAGGCTTGGATATGGGGGTTGCGGGCTTCTCAGAAGTCAGCTCTCCTTAAATGCATTAGCAGAACCTTGGTTGACTAGCTCTGGTGTGATAATTATCTACGCTATTGTGAAGCAGCTTTATATGGGGTTCAGCTTCTAACGGTCCTTTTATTAGGACAACTTTTTGACATTTGACCTCAAATCAGGTAGGACTACCCGCTGAACTTAA	AY265850	SH194014.06FU		Saprotroph		Fungi	Basidiomycota	Agaricomycetes	Agaricales	Lyophyllaceae		JX046035	Hypsizygus_marmoreus
GL04361	IGJRWKL02G6SFB	TCAACTTTATAAGTTTTTACTTATTAAAGCTTGGATGTTGGAGGCTTGCAGGCGTTTGTCAGCTCCTCTTAAATTTATTAGTGGGAACCCTGTTTTGTTAGTTCTAACCTTGGTGTGATAATTATCTACATTTTGGTGGAACCTTACAATAATAAAGCTCTATTGGTTTGGGTTGTTGCATTTAGTTTGCTCAATCTGTTCTATTCATTGGAGAAAAAGGGAAGTTCTGCTTTCTAACTGTCTTGATTGACTATATATAACTTATTTGCTTGACCTCAAATCAGGTAGGATTACCCGCTGAACTTAA	AY636053	SH237388.06FU		Saprotroph	White rot	Fungi	Basidiomycota	Agaricomycetes	Agaricales	Marasmiaceae	Lentinula	JX205093	Lentinula_edodes
GL14147	IGJRWKL02JQLV5	CTAGACTCGTCAACGATGAAGAACGCAGCGAAATGCGATAAGTAATGTGAATTGCAGAATTCAGTGAATCATCGAATCTTTGAACGCACCTTGCGCCCTTTGGTATTCCGAAGGGCATGCCTGTTTGAGTGTCATTAAATTATCAACCTTGCTCGCTTTTTACCGGCTTGAGTTAGGCTTGGATGTGAGGGCTTTGCTGGCTTCCTTCAGTGGATGGTCTGCTCCCTTTAAATGCATTAGTGGGATCTCTTGTGGACCGTCACTTGGTTGTGATAATTATCTACGCCATTTGACTTTGAAGCAAACTTATGGGAACCTGCTTATAACCGTCCTTTCGAGGACAATCTTTTTGACATTTTGACCTCAAGTCAGGTAGGACTACCCGCTGAACTTAA	HQ604763	SH193141.06FU		Saprotroph		Fungi	Basidiomycota	Agaricomycetes	Agaricales	Mycenaceae	Mycena	UDB015269	Mycena_viridimarginata
GL15107	ID03IXK02HHZ6L	CTAGACTCGTCATCGATGAAGAACGCTGCGAAATGCGATAAGTAATGTGAATTGCAGAATTCAGTGAATCATCGAATCTTTGAACGCACCTTGCGCCCTTTGGTATTCCGAAGGGCATGCCTGTTTGAGTGTCATTAAATTATCAACCTTGTTCGCTTTTACGAGCTTGAGCAAGGCTTGGATGTGAGGGCTTGCTGGCTTCCTTCAGTGGATGGTCTGCTCCCTTTAAATGCATTAGTGGGATCTCTTGTGGACCGTCACTTGGTGTGATAATTATCTATGCCAGTTGACTTTGAAGCAAACTTTATGGGAACCCGCTCATAACCGTCTCGCAAGAGAGACAATTTTTTATTGACTTGACCTCAAATCAGGTAGGACTACCCGCTGAACTTAA	JF519179	SH239790.06FU		Saprotroph		Fungi	Basidiomycota	Agaricomycetes	Agaricales	Mycenaceae	Mycena	JF908483	Mycena_thymicola
GL22796	IJOVCJS01BCTK8	ATCCAGTGAATCATCGAGTCTTTGAACGCACCTTGCGCCCTTTGGTATTCCGAAGGGCATGCCTGTTTGAGTGTCTTTAATATCTATCAACCATTTTGCGTGCTTGCATGCAGCTTGGCTTGGATGTGAGGGTTATTGCTGGCTTTCGTGGTCTGCTCCCTTTAAATGCATTAGTGGAATCTTCCTGCAGCCGGTCTTTCCGTGTGATATACCTTTACGCGGTCTGTACTTGTGGGGAGGCCTGCTCATAACCGTCCGAAAGGACAATTTTCTTAAGACATTGACCTCAAATCAGGTAGGACTACCCGCTGAACTTAA	FJ596760	SH232507.06FU		Saprotroph		Fungi	Basidiomycota	Agaricomycetes	Agaricales	Mycenaceae	Mycena	FJ596761	Mycena_rorida
GL18607	ID03IXK02F1ZMQ	CTAGACTCGTCACCGATGAAGAACGCAGCGAAATGCGATAAGTAATGTGAATTGCAGAATTCAGTGAATCATCGAATCTTTGAACGCACCTTGCGCTCCTTGGTATTCCGAGGAGCATGCCTGTTTGAGTGTCATTAAATTCTCAACCTCCCCAGCTTTTACCGGCCGGAGGAGGATTGGATTGTGGGGGTTGCGGGCCTCAACTAGAGGTCGGCTCTCCTTAAACGCATTAGCGGAACGTCTCGCGGGACCCGTCACTTGGTGTGATAATTATCTACGCCTCATGACTGCGATCGCCTCTGGTTCAGCTTCTAACCGTCCGTTCGCTCGGACAGCTTTTTGACAATTTGACCTCAAATCAGGTAGGACTACCCGCTGAACTTAA	GU320004	SH209005.06FU		Saprotroph	White rot	Fungi	Basidiomycota	Agaricomycetes	Agaricales	Mycenaceae	Xeromphalina	UDB015419	Xeromphalina_cauticinalis
GL18096	ID1YYUI02FUFKB	CTAGACTCGTCATCGATGAAGAACGCTGCGAAATGCGATACGTAATGTGAATTGCAGAATTCAGTGAATCATCGAATCTTTGAACGCATATTGCGCTCTTTGGTATTCCGAAGAGCATGCTTGTTTGAGTGTCATTAAATTCTCAACCTTCCCAGCTTTTACCGGCCGGAGGAGGATTGGATTGTGGGGGTTGCGGGCCTCGATTTAGAGGTCGGCTCTCCTTAAACGCATTAGCGGAACGTCTCGCGGGACCGTCACTTGGTGTGATAATTATCTACGCCTCATGACTGCGATCGCCTCTGGTTCAGCTTCTAACCGTCCGTTCGCTCGGACAGCTTTTTGACAATTTGACCTCAAATCAGGTAGGACTACCCGCTGAACTTAA	FJ596890	SH209005.06FU		Saprotroph	White rot	Fungi	Basidiomycota	Agaricomycetes	Agaricales	Mycenaceae	Xeromphalina	AM902084	uncultured_Basidiomycota
GL18874	IGJRWKL02HPN9Y	CTAGACTCGTCATCGATGAAGAACGCAGCGAAATGCGATAAGTAATGTGAATTGCAGAATTCAGTGAATCATCGAATCTTTGAACGCACCTTGCGCTCCTTGGTATTCCGAGGAGCATGCCTGTTTGAGTGTCATTAAATTCTCAACCTCTCCAGCTTTTTGGGCTGGGTGAGGATTGGATGTGGGGGCGTGCCGGCTTCGTCAAAGAGGTCGGCTCCCCTTAAATGCATTAGCGGGAACGTCTTGCGGACCGTCACTTGGTGTGATAATTATCTACGCCTCATGACCGCGATGCTCTTGTTCTGCTTCTAACCGTCCATTGACTTGGACAAGCTTTTTTGACAATTTGACCTCAAATCAGGTAGGACTACCCGCTGAACTTAA	UDB015537	SH209007.06FU		Saprotroph	White rot	Fungi	Basidiomycota	Agaricomycetes	Agaricales	Mycenaceae	Xeromphalina	HQ604741	Xeromphalina_campanella
GL01263	ID03IXK02GTXPD	GGGGTTTGCTGGTTTCTAACGAAATCAGCTCCTCTGAAATGCATTAGCAGAAACCGTTTGACTCTGGCTGCTAGGCTGTGATAATATCTACGCCTTGGTAGTTGGGTCGGAATACGAGTCATACAGTGGTAACTAATCAGGCTTTCGAGTCTGGCTTAGGATTGGTTTGGAAGGTGCTTAACGGCTCCTTCTGCTTTCTCCCTTTGCGGAGATACTTGTCCGATTCTAAGAGAGGAGTTGCTTAGCGCGAGCTTAGCTTTCCTTGATTTTTCCCTTGACTTTGTAGAAGGATTCAGCTTCTAACCGTCCATTGACTTGGACAATTTATTGACTATTTGACCTCAAATCAGGTAGGACTACCCGCTGAACTTAA	AB510855	SH240409.06FU		Saprotroph	White rot	Fungi	Basidiomycota	Agaricomycetes	Agaricales	Physalacriaceae	Armillaria	UDB017893	Armillaria_ostoyae
GL36831	ID1YYUI01ELN0I	TTGTGTTGTTTGGTGATTGGATTATGGGGGTTTGCTGGCCTCGTTCAGCTCCCCTGAAAAGCATTAGCAGGACATTATGCCATCTGTGCTTTGTATGATATTTATCTATACACTGTACTTATTGTGCACAACTGCTTCTAACTGTCACTTCTGACATTTGACCAATTTGACCTCAAATCAGGTAGGACTACCCGCTGAACTTAA	KF306013	SH201428.06FU		Saprotroph		Fungi	Basidiomycota	Agaricomycetes	Agaricales	Pluteaceae	Pluteus	JX857461	Pluteus_cervinus
GL15561	IGJRWKL02JSKWB	CTAGACTCGTCATCGATGAAGAACGCTGCGAAATGCGATAAGTAATGTGAATTGCAGAATTCAGCGAATCATCGAATCTTTGAACGCACCTTGCGCTCGTTGGTATTCCGACGAGCATGCCTGTTTGAGTGTCATTAAATTCTCAACCTCACCAGTTTTGTTATGAGACTGTGTAAGGCTTGGATGTGGGGGTTTGTGCAGGCTGCCTCAGCGCGGTCTGCTCCCCTGAAATGCATTAGCGAGTTCAAACTGAGCTCCGTCTATTGGTGTGATAATTATCTACGCCGTGGATGGTTCTTAGACTTGCTTCTAACCGTCCGCAAGGACAACTCTTGACAATTTGACCTCAAATCAGGTAGGACTACCCGCTGAACTTAA	JN159535	SH220729.06FU		Saprotroph		Fungi	Basidiomycota	Agaricomycetes	Agaricales	Psathyrellaceae	Coprinellus	JN159536	Coprinellus_angulatus
GL20790	IGJRWKL02IG4K4	CTAGACTCGTCACCGATGAAGAACGCAGCGAAATGCGATAAGTAATGTGAATTGCAGAATTCAGTGAATCATCGAATCTTTGAACGCACCTTGCGCTCCTTGGTATTCCGAGGAGCATGCCTGTTTGAGTGTCATTAAATTCTCAACCTCACCAGTTTTCTGAACTGTTCTTCGAGGCTTGGATGTGGGGGTTTGTGCAGGCTGCCTCACGGCGGTCCGCTCCCCTGAAATGCATTAGCGAGTTCATACTGAACTTCCGTCTATTGGTGTGATAATTATCTACGCCGTGGACGAGGATCAGACTCGCTTCTAACCGTCCGCGAGGACAAATACCTTGACAATTTGACCTCAAATCAGGTAGGACTACCCGCTGAACTTAA	JX049405	SH239391.06FU		Saprotroph		Fungi	Basidiomycota	Agaricomycetes	Agaricales	Psathyrellaceae	Coprinellus	JN198387	Coprinellus_xanthothrix
GL18034	ID1YYUI01BCL67	CTAGACTCGTCATCGATGAAGAACGCAGCGAAATGCGATAAGTAATGTGAATTGCAGAATTCAGTGAATCATCGAATCTTTGAACGCACCTTGCGCTCGTTGGTATTCCGACGAGCATGCCTGTTTGAGTGTCATTAAATTCTCAACCTCACCACTTTTGTAATGAGAGTGTGTGTTGGCTTGGATGTGGGGGTTTGCAGGTCCACTCTTTTGTGGTCTGCTCCTCTGAAATGTATTAGTGGGTTTGGTCCCCTAATCTATTGGTGTGATAATTATCTACGCCGTGGATTGGAAGACTATTATGAACCTGCTTCTAACCGTCCCTTACACGGACAATACTTGACATTTTTGACCTCAAATCAGGTAAGACTACCCGCTGAACTTAA	GQ249277	SH229020.06FU		Saprotroph		Fungi	Basidiomycota	Agaricomycetes	Agaricales	Psathyrellaceae	Coprinopsis	KC438399	uncultured_Pleosporales
GL22294	ID1YYUI01BGJKS	CTAGACTCGTCATCGATGAAGAACGCTGCGAAATGCGATAAGTAATGTGAATTGCAGAATTCAGTGAATCATCGAATCTTTGAACGCACCTTGCGCTCCTTGGTATTCCGAGGAGCATGCCTGTTTGAGTGTCATTAATTTCTCAACCTCACCAACTTTGTGTTGTGTGAAGGCTTGGACGTGGGGGCTGCAGGCTCACATACGTGTGGTCTGCTCCTCTGAAATGCATTAGTGGGTTAGTCCCCTAATCTACTGGTGTGATAATTATCTACGCCGTGGATTTGGATGGCTGTTAAAGACCTGCTTCTAACCGTCCTTCTGGGACAACTCTTGACAATTTTGACCTCAAATCAGGTAAGACTACCCGCTGAACTTAA	GU053799	SH236620.06FU		Saprotroph		Fungi	Basidiomycota	Agaricomycetes	Agaricales	Psathyrellaceae	Coprinopsis	FN396116	Coprinopsis_jonesii
GL22542	IJOVCJS01B3WRS	CTAGACTCGTCAACGATGAAGAACGCAGCGAAATGCGATAAGTAATGTGAATTGCAGAATTCAGTGAATCATCGAATCTTTGAACGCACCTTGCGCTCCTTGGTATTCCGAGGAGCATGCCTGTTTGAGTGTCATTAAATTCTCAACTTCATCAACTTTGTTGTTGAGGCTTGGATGTGGGGGTTTTGCAGGTCTGCCTTAATTGTGCGGTCTGCTCCCCTGAAATGTATTAGCGGGTTGGCTTCCCTCTATCAGTGTGATAATTATCTACGCTGTGGATGGGTTTGGCTTTCAGACCGGCTTCTAATCGTCCTTTCAAAGGACAATCTATTGACATTTTTGACCTCAAATCAGGTAGGACTACCCGCTGAACTTAA	DQ389724	SH208929.06FU		Saprotroph		Fungi	Basidiomycota	Agaricomycetes	Agaricales	Psathyrellaceae	Lacrymaria	UDB018012	Lacrymaria_pyrotricha
GL22210	ID1YYUI01D8P6E	CTAGACTCGTCATCGATGAAGAACGCAGCGAAATGCGATAAGTAATGTGAATTGCAGAATTCAGTGAATCATCGAATCTTTGAACGCACCTTGCGCTCCTTGGTATTCCGAGGAGCATGCCTGTTTGAGTGTCATTAAATTCTCAACTTCATCAGTTTTGTTATGAAACTGTGTGAAGCTTGGATGTGGGGGTTGTGCAGAACGCTTAACTGCTGACTGCTCCTCTCAAATGGATTAGCGAGTTCAAACTGAGCTCCGTCTATTGGTGTGATAATTATCTACGCCGTGGATGGAATTTAGACTTGCTTCTAACCGTCTGCAAAGACAATTTTTGACAATTTGACCTCAAATCAGGTAGGACTACCCGCTGAACTTAA	AM712263	SH199672.06FU		Saprotroph		Fungi	Basidiomycota	Agaricomycetes	Agaricales	Psathyrellaceae	Psathyrella	AM712263	Psathyrella_fagetophila
GL21554	IJOVCJS01ESTUQ	ACTCGTCAACGATGAAGAACGCAGCGAAATGCGATAAGTAATGTGAATTGCAGAATTCAGTGAATCATCGAATCTTTGAACGCACCTTGCGCTCCTTGGTATTCCGAGGAGCATGCCTGTTTGAGTGTCATTAAATTCTCAACCTCACCAATTTTGTTATGAAGTTGTGTGTAGGCTTGGATGTGGGGGTTGCAGGTCCACTCTGTGGTCTGCTCCTCTGAAATGTATTAGTGGGTTTGGCCCCTAATCTATTGGTGTGATAATTATCTACGCCGTGGATTGGAAGGCTGTTACGACCTGCTTCTAACCGTCCTTCACAGGACAACTCTTGACATTTTTGACCTCAAATCAGGTAAGACTACCCGCTGAACTTAA	EU516705	SH229044.06FU		Saprotroph		Fungi	Basidiomycota	Agaricomycetes	Agaricales	Psathyrellaceae		EF635638	uncultured_Agaricaceae
GL30397	IGJRWKL02IKX0Y	TTTTGCAGGCTCTAGTTAGTCGGCTCCCTTTAAATTCATTAGCGAGACTTCCCTCTGCTGACCGTCTCTGGCGTGATAATTATCTGCGTCGTTGTTTTACGGTTCTCGTTGGGCTTGCTTCTAATCGTCTTTCACCGGACAACCGAATTCAAGTGCATATATGCGCCTATGTTCGAACCTTTTTGACCTCAGATCGGGTAGGACTACCCGCTGAACTTAA	UDB016420	SH207369.06FU		Saprotroph		Fungi	Basidiomycota	Agaricomycetes	Agaricales	Stephanosporaceae	Cristinia	GU187526	Cristinia_sp_FP_100305
GL16324	IJOVCJS01BULSF	CTAGACTCGTCACCGATGAAGAACGCAGCGAAATGCGATAAGTAATGTGAATTGCAGAATTCAGTGAATCATCGAATCTTTGAACGCACCTTGCGCTCCTTGGTATTCCGAGGAGCATGCCTGTTTGAGTGTCATTAATTTCTCAACCTTACCAGCTTTTACAAGCTTCGGTAATGGCTTGGATATGGGGGTCTTTTGCTGGCTTCATCATGATGTCTGCTCCCCTTAAATGCATTAGCTGGTGCCCCGCGTGGACCATCTATTGGTGTGATAATTATCTACGCCGTTAGATGTCTGCTTTAATGGGTTGCGCTGCTTCTAACCGTCCATTCACTTGGACAATCAATGACAATTTGACCTCAAATCAGGTAGGACTACCCGCTGAACTTAA	AJ585482	SH201473.06FU		Saprotroph		Fungi	Basidiomycota	Agaricomycetes	Agaricales	Strophariaceae	Galerina	UDB011712	Galerina_clavata
GL17012	ID03IXK02GKEJR	CTAGACTCGTCATCGATGAAGAACGCTGCGAAATGCGATAAGTAATGTGAATTGCAGAATTCAGTGAATCATCGAATCTTTGAACGCACCTTGCGCTCCTTGGTATTCCGAGGAGCATGCCTGTTTGAGTGTCATTAAATTCTCAACCTTACCAGTTTTCACGAATTGGTAATGGCTTGGACTTGGGGGTTTTTTGCTGGCTTCGTCAAGAGGTCTGCTCCCCTTAAATGTATTAGCCGGTACCCTTGTGGAGTCGTCTATTGGTGTGATAATTATCTACGCCGTGGGCCTTCACTTTAAATGGATTGTACTGCTTCTAACCGTCCGTTAAGTCGGACAAATAATGACAATTTGACCTCAAATCAGGTAGGACTACCCGCTGAACTTAA	AJ585497	SH210209.06FU		Saprotroph		Fungi	Basidiomycota	Agaricomycetes	Agaricales	Strophariaceae	Galerina	UDB015652	Galerina_marginata
GL17839	ID1YYUI01EBW8S	CTAGACTCGTCACCGATGAAGAACGCAGCGAAATGCGATAAGTAATGTGAATTGCAGAATTCAGTGAATCATCGAATCTTTGAACGCACCTTGCGCTCCTTGGTATTCCGAGGAGCATGCCTGTTTGAGTGTCATTAAATTCTCAACCTTACTAGCTTTTGTTGGTAATGGATTGGATGTGGGGGTCTTCTGCTGGCTTCGTCAAGAGGTCTGCTCCCCTTAAATGCATTAGCCGGTGCCCCGCGTGGACCCGTCTATTGGTGTGATAATTATCTACGCCGTGGACGTCTGCTTTAAATGGGTTGTGCTGCTTCTAACCGTCTATTCAGTTGGACAATCAATGACAATTTGACCTCAAATCAGGTAGGACTACCCGCTGAACTTAA	KC876301	SH190434.06FU		Saprotroph		Fungi	Basidiomycota	Agaricomycetes	Agaricales	Strophariaceae	Galerina	JQ272382	Galerina_sp_1_RB_2011
GL19495	ID03IXK02HITU7	CTAGACTCGTCAACGATGAAGAACGCAGCGAAATGCGATAAGTAATGTGAATTGCAGAATTCAGTGAATCATCGAATCTTTGAACGCACCTTGCGCTCCTTGGTATTCCGAGGAGCATGCCTGTTTGAGTGTCATTAAATTCTCAACCTTATCAGCTTTTGTTGATAATGGCTTGGATGTGGGGGTTTTGCTGGCTTCGTCAAGAGGTCTGCTCCCCTTAAATGCATTAGCCGGTACCCTGCGTGGACTGTCTATTGGTGTGATAATTATCTACGCCGTGGATGTCTGCTCTTTATGGGTTGTACTGCTTCTAACCATCCATTTAGTTGGATAATCAATGACAATTTGGCCTCAAATCAGGTAGGACTACCCGCTGAACTTAA	AJ585458	SH190435.06FU		Saprotroph		Fungi	Basidiomycota	Agaricomycetes	Agaricales	Strophariaceae	Galerina	EU292458	uncultured_fungus
GL16610	IGJRWKL02F5C0S	CTAGACTCGTCATCGATGAAGAACGCTGCGAAATGCGATAAGTAATGTGAATTGCAGAATTCAGTGAATCATCGAATCTTTGAACGCACCTTGCGCTCCTTGGTATTCCGAGGAGCATGCCTGTTTGAGTGTCATTAAATTCTCATCCTTATTAGCTTTTGCTGATAATGGCTTGGACTTGGGGGTCTTTTGCCGGCTTTTAACAAAGTCAGCTCCCCTTAAATGCATTAGCTGGTACCCTCTGGTGGAACCGTCTATTGGTGTGATAATTATCTACGCCGTGGACATCTGCCCTTAGAGTAGGTGTGCTGCTTCTAACCGTCTGTTCATTCGGACAATACATATGACATTTTGACCTCAAATCAGGTAGGACTACCCGCTGAACTTAA	AM902019	SH237352.06FU	hebeloma-alnicola	EcM		Fungi	Basidiomycota	Agaricomycetes	Agaricales	Strophariaceae	Kuehneromyces	AM902019	uncultured_Basidiomycota|Kuehneromyces|
GL17257	ID1YYUI01EQATC	CTAGACTCGTCATCGATGAAGAACGCTGCGAAATGCGATAAGTAATGTGAATTGCAGAATTCAGTGAATCATCGAATCTTTGAACGCACCTTGCGCTCCTTGGTATTCCGAGGAGCATGCCTGTTTGAGTGTCATTAAATTCTCAACCTTATCAGCTTTTGTTGATAATGGCTTGGATGTGGGGGTTTATTTGCTGGCTTCTTAATGATATCAGCTCCCCTTAAATGCATTAGCTGGTTGCCTTGTGCAGACTTGTCTATTGGTGTGATAATTATCTACGCCGTGGACTGACTTGCCAGTATTAGCACCGCTTCTAACTGTCTGTTTACTCGGACAATATATATGACAATTTGACCTCAAATCAGGTAGGACTACCCGCTGAACTTAA	KC122886	SH199562.06FU		Saprotroph	White rot	Fungi	Basidiomycota	Agaricomycetes	Agaricales	Strophariaceae	Pholiota	KC122879	Pholiota_cf_spumosa_UC_1998527
GL25166	ID1YYUI01C8WOK	CTAGACTCGTCATCGATGAAGAACGCTGCGAAATGCGATAAGTAATGTGAATTGCAGAATTCAGTGAATCATCGAATCTTTTAACGCATCTTGCGCTCCTTGGTATTCCGAGGAGCATGCCTGTTTGAGTGTCATTAAATTCTCAACCTTACTTGCATTTTTGCAAGCAAGGCTTGGATGTGGGGGTTTGTGCTGGCTTGTAACGAGTCGGCTCCCCTGGAATGCATTAGTGGCTCACTTCGCACTATTCAGCGTGATAATATCTACGTTGCTTAGGCGAATGCATGAACTGCTTCGAACTGTCTGAGTTTCTCGGACACTACAATGACAATCTTGACCTCAAATCAGGTAGGACTACCCGCTGAACTTAA	JF440578	SH199567.06FU		Saprotroph	White rot	Fungi	Basidiomycota	Agaricomycetes	Agaricales	Strophariaceae	Pholiota	KC122881	Pholiota_sp_UC_1999274
GL29652	ID1YYUI01A12JE	TTTATTAACTAGTAGATGGCTTGGATGTGGGGGTTATTTTGCCGGCTTTCACAAGTCAGCTCCCCTTAAATGTATTAGCCGGTGCCCTCTAACCGTCTATTGGTGTGATAATTATCTACGCCGTGGACTATTAGACTTGGTTGCATTGCTTCTAATCGTCCTTTATGGACAATATAATGACATTTTGACCTCAAATCAGGTAGGACTACCCGCTGAACTTAA	HM036648	SH218687.06FU		Saprotroph		Fungi	Basidiomycota	Agaricomycetes	Agaricales	Strophariaceae	Psilocybe	HM036648	Psilocybe_sp_KRP22
GL16536	ID03IXK02G8D94	CTAGATCGTCAACGATGAAGAACGCAGCGAAATGCGATAAGTAATGTGAATTGCAGATCACAGTGAATCATTGAATTTTTGAACGCACCTTGCGCCCTTTGGTATTCCGAAGGGCATGCCTGTTTGAGTGTCATTAAATCATCAATCGATGGATTGATCTATGTGGATTGGCTTCCACGTGGTGTTATCCTTCGACTTGGATGTGGAGGTTGCTGGCTTATAACAAAAGTCGGCTCTTCTTAAATGCATCAGCGATCCTTAGAGTAAGGGGGCTTTGGTTTGATAACTCGTTGTCTAATCAACTCCGACTCTTGTATTGCTTTACATTGTGACAACACAATCATTGACCCTTTGACCTCAAATCAGGTAGGACTACCCGCTGAACTTAA	UDB011847	SH228750.06FU		Saprotroph		Fungi	Basidiomycota	Agaricomycetes	Agaricales	Tricholomataceae	Cantharellula	UDB011372	Cantharellula_umbonata
GL13681	IGJRWKL02G43VH	CTAGACTCGTCATCGATGAAGAACGCAGCGAAATGCGATAAGTAATGTGAATTGCAGAATTCAGTGAATCATCGAATCTTTGAACGCACCTTGCGCTCCTTGGTATTCCGAGGAGCATGCCTGTTTGAGTGTCATTAAATTCTCAACCTTTTCAGCTTTTACAAGTTGGATTGGCTTGGATGTGGAGGTTTTTGCAGGCTTCTCAGAAGTTAGCTCCTCTTAAATGCATTAGCGGAACCTTTGTGGACCAGCTTTGGTGTGATAATTATCTACGCCATGGTTGTGAAGCAGCTATTATATGGGGTTCAGCTTCTAACAGTCCATTGACTTGGACAATTTCTTGACATTTTGACCTCAAATCAGGTAGGACTACCCGCTGAACTTAA	FJ213528	SH216248.06FU		Saprotroph		Fungi	Basidiomycota	Agaricomycetes	Agaricales	Tricholomataceae	Lepista	JQ519375	Lepista_nuda
GL18213	ID03IXK02FJXZQ	CTAGACTCGTCATCGATGAAGAACGCAGCGAAATGCGATAAGTAATGTGAATTGCAGAATTCAGTGAATCATCGAATCTTTGAACGCGCCTTGCGCTCCTTGGTATTCCGAGGAGCATGCCTGTTTGAGTGTCATGAAATTCTCAACCATTTCAGCTTTTTCTAGCTGATTTAGGCTTGGATGTGGGAGTTTGCGGGCTTCTCTGAAGTCGGCTCTCCTTAAATATATTAGTAGGGACCTCTGTTGCCTCAGCTCTTGGTGTGATAGTTATCTACGCCATTCTGCGAAGCAGCTTTAAAATGGGGTTACTGCTTTCTAACAGTCTCTACCGAGACAACTTCTGACAATTTGACCTCAAATCAGGTAGGACTACCCGCTGAACTTAA	UDB011642	SH232751.06FU	tricholoma	EcM		Fungi	Basidiomycota	Agaricomycetes	Agaricales	Tricholomataceae	Tricholoma	EU223004	fungal_sp_MR60|Tricholoma|
GL27062	ID1YYUI01DUOM8	CTAGACTCGTCACCGATGAAGAACGCAGCGAAATGTGATAAGTAATGTGAATTGCAGAATTCAGTGAATCATCGAATCTTTGAACGCACCTTGCGCTCCTTGGTATTCCGAGGAGCATGCCTGTTTGAGTGTCATTAAATTCTCAACCCACTTGACTTTTTGTTAAGTTGGGCTTGGACTTGGGGGTTGCCGGCGTAAGTCGACTCCTCTTAAATGCATTAGTGGGAGCGCAAAGCTTTTGCGGATGGTGTGATAATAATATATCTACGCCTTCAAGCCGCAAAGACGCACTTGCTTATAACAGTCTCTTTGGACAACTTTGACAATCTTGACCTCAGATCAGGTAGGACTACCCGCTGAACTTAA	KC514915	SH217838.06FU		Saprotroph		Fungi	Basidiomycota	Agaricomycetes	Amylocorticiales			DQ144610	Amyloathelia_crassiuscula
GL25881	IGJRWKL02GCYL4	CTAGACTCGTCACCGATGAAGAACGCAGCGAAATGCGATAAGTAATGTGAATTGCAGATTTTCAGTGAATCATCGAATCTTTGAACGCACCTTGCGCTCCTTGGTATTCCGAGGAGCATGCCTGTTTGAGTGTCATTAAATTCTCAACCCCACCGATTTGCTTCGGGGGGATTGGACTTGGAGCGTGCTGGCGAAGGTCGGCTCCTCTTTAAATGCATCAGTGGAGAGAAACTCGCCCCAGTGTGATAATCCTGTTGCGCTGTGGTGGGCGAAAGTCTGCTTCCAACCGTCCCTCCGGGGGGACATACGTCATCTCATTTTGACCTCAAATCAGGTAGGACTACCCGCTGAACTTAA	UDB008257	SH229867.06FU	amphinema-tylospora	EcM		Fungi	Basidiomycota	Agaricomycetes	Atheliales	Atheliaceae	Amphinema	GU452524	uncultured_Amphinema
GL27072	ID1YYUI01BRDNZ	CTAGACTCGTCATCGATGAAGAACGCAGCGAAATGCGATAAGTAATGTGAATTGCAGATTTTCAGTGAATCATCGAATCTTTGAACGCACCTTGCGCTCCTTGGTATTCCGAGGAGCATGCCTGTTTGAGTGTCATTAAATCCTCAACCCCACCGATTTGCTTCGGGGGGATTGGACTTGGAGCGTGCTGGCGAAGGTCGGCTCCTCTTTAAATGCATCAGCGGAGAAGAAAGCTCGTCCCAGTGTGATAATCCTGTTGCGCTGTGGTGGGGTGAAAATTCCGCTTCCAACCGTCCTCCGGGACAAGACATCTCAATTTGACCTCAAATCAGGTAGGACTACCCGCTGAACTTAA	DQ233799	SH229869.06FU	amphinema-tylospora	EcM		Fungi	Basidiomycota	Agaricomycetes	Atheliales	Atheliaceae	Amphinema	UDB008290	Amphinema_byssoides_(Atheliaceae)
GL24460	ID1YYUI02JSMWY	CTAGACTCGTCACCGATGAAGAACGCAGCGAAATGCGATAAGTAATGTGAATTGCAGATTTTCAGTGAATCATCGAATCTTTGAACGCACCTTGCGCTCCTTGGTATTCCGAGGAGCATGCCTGTTTGAGTGTCATTAAATTCTCAAACTCTGATTGATTTGTTTCAATCGGAGGTTTGGATTTGGAGCGTGCCGGCGTCAAGTCGGCTCCTCTTGAATGCATCAGCGGAATCCCGGGATTCATTTCGGACGTCAGTGTGATAATCATGTTGCGCTGTCTTTGCGATCTTGAAAGCCCGCTCACAATGGTCTTCGGACAAACCTCACATATCATATTTGACCTCAAATCAGGTAGGACTACCCGCTGAACTTAA	JF300620	SH212384.06FU	piloderma	EcM		Fungi	Basidiomycota	Agaricomycetes	Atheliales	Atheliaceae	Piloderma	UDB016381	Piloderma_byssinum
GL20682	ID1YYUI01DR69B	ATCCCCTGTGTGCCTTGAACGCCGACCACACCTAGTATCTAGACTCGTCATCGATGAAGAACGTAGCGAAATGCGATAAGTAATGTGAATTGCAGATTTTCAGTGAATCATCGAATCTTTGAACGCACCTTGCGCTCCTTGGTATTCCGAGGAGCATGCCTGTTTGAGTGTCATTAAATTCTCAACTCCGATCGATTTGTTTCGACCTCGGAGCTTGGACTTTGGAGTGTGCTGGCGTCGGTCGGCTCCTCTCAAATGCATCAGCGGAATCTAACGTTTCGGACGTCAGTGTGATAATCACGTTGCGCTGTCAACCGATCCTGAAAGGCCCGCTCATAATGGTCTTCGGACAACTTCATATCAAATTTGACCTCAAATCAGGTAGGACTACCCGCTGAA…	UDB001740	SH212383.06FU	piloderma	EcM		Fungi	Basidiomycota	Agaricomycetes	Atheliales	Atheliaceae	Piloderma	UDB001740	Piloderma_fallax
GL22371	ID1YYUI01DNLQ4	CTAGGACTCGTCACCGATGAAGAACGCAGCGAAATGCGATAAGTAATGTGAATTGCAGATTTTCAGTGAATCATCGAATCTTTGAACGCACCTTGCGCTCCTTGGTATTCCGAGGAGCATGCCTGTTTGAGTGTCATTAAATTCTCAACCCCGAACCTTTTGGTTTCGGGGCTTGGACTTGGAGCGTGCTGGCCTTCCGGGGTCGGCTCCTCTCAAATGCATCAGCGGAATCTAACCTTTGGTTTCCGGAAGTCGGTGTGATAATCATGTTGCGCCGTCGTCTGACCTCAAAGTCCGCTTACAATGGTCTTTGGACAACTTATCAAATTTGACCTCAAATCAGGTAGGACTACCCGCTGAACTTAA	UDB001726	SH212381.06FU	piloderma	EcM		Fungi	Basidiomycota	Agaricomycetes	Atheliales	Atheliaceae	Piloderma	UDB001729	Piloderma
GL23074	ID1YYUI02GPAJA	CTAGACTCGTCATCGATGAAGAACGCTGCGAAATGCGATAAGTAATGTGAATTGCAGATTTTCAGTGAATCATCGAATCTTTGAACGCACCTTGCGCTCCTTGGTATTCCGAGGAGCATGCCTGTTTGAGTGTCATTAAATTCTCAAACTCTGATTGATTTGTTTCAATCGGAGGTTTGGATTTGGAGCGTGCCGGCGTCAAGTCGGCTCCTCTTGAATGCATCAGCGGAATCCCATTCATTTCGGACGTCAGTGTGATAATCATGTTGCGCTGTCTTTGCGATCTTGAAAGCCCGCTCACAATGGTCTTCGGACAAACCTCACAATATCATATTTGACCTCAAATCAGGTAGGACTACCCGCTGAACTTAA	JF300620	SH212384.06FU	piloderma	EcM		Fungi	Basidiomycota	Agaricomycetes	Atheliales	Atheliaceae	Piloderma	UDB016381	Piloderma_byssinum
GL27187	ID03IXK02FROO8	CTAGACTCGTCATCGATGAAGAACGCAGCGAAATGCGATAAGTAATGTGAATTGCAGATTTTCAGTGAATCATCGAATCTTTGAACGCACCTTGCGCCCCTTGGTATTCCGAGGGGCATGCCTGTTTGAGTGTCATTAAATTCTCAACTCCGATTTGTTTCTTATCGGAGCTTGGACTTTGGAGCGTGCTGGCGTAAGGTCGGCTCCTCTTAAATGTATCAGCGGAATCTAACCTTTGGATTCTGGACATCGGTGTGATAATAAAAGTTGCGCCGTCGTTCTACTTCAAAGTCCGCTTACAATGGTCTTTTGACAAACTCTTATCAAATTTGACCTCAAATCAGGTAGGACTACCCGCTGAACTTAA	UDB001733	SH212382.06FU	piloderma	EcM		Fungi	Basidiomycota	Agaricomycetes	Atheliales	Atheliaceae	Piloderma	UDB001735	Piloderma
GL28132	ID1YYUI01EZ3E3	CTGTTTGAGTGTCATTAAATTCTCAACTCCGATTGATTTGTTTCGACTTCGGAGCTTGGATTTGGAGCGTGCTGGCGTCGGTCGGCTCCTCTTAAATGCATCAGCGGAATCTAACGTTTCGGACGTCAGTGTGATAATCATGTTGCGCTGTCCGTCTGATCCGAAAGCCCGCTCACAATGGTCTTCGGACAACTTCATATCAAATTTGACCTCAAATCAGGTAGGACTACCCGCTGAACTTAA	JQ711925	SH212379.06FU	piloderma	EcM		Fungi	Basidiomycota	Agaricomycetes	Atheliales	Atheliaceae	Piloderma	JQ711915	Piloderma_olivaceum
GL28580	ID03IXK02GV8II	AAAGGCTTTTTTTGGTCTTTCGGGGCTTGGAGTTGGAGGCTTGCCGGCGTGAGTCGGCTCCTCTTAAATGTATCAGCGAAAAATACAAACCTTTTTCGGCTTTGGTGTGATAATCACGTTGCGCCGTCGCTTGAAGGCATAAAGAGTTTCGCTTATAATGGTCTTCGGACAAATAAAACCATTGAATTTGACCTCAAATCAGGTAGGACTACCCGCTGAACTTAA	DQ377372	SH217966.06FU	piloderma	EcM		Fungi	Basidiomycota	Agaricomycetes	Atheliales	Atheliaceae	Tretomyces	UDB001723	Tretomyces_lutescens
GL18984	ID1YYUI01BG21X	TAGTATCTAGACTCGTCATCGATGAAGAACGCAGCGAAATGCGATAAGTAATGTGAATTGCAGATTTTCAGTGAATCATCGAATCTTTGAACGCACCTTGCGCCCCTTGGTATTCCGAGGGGCATGCCTGTTTGAGTGTCATTAAATCCTCAACCGCGCCGATCGATTTCGGTGGGGCTTGGACTTTGGAGCGTGCTGGCGAAGGTCGGCTCCTCTTTAAATGCATCAGCGGAAGAAACCTTTGTCTTTCCTGCCCTTCGGTGTGATAATCGTGTTGCGCCGCGGTGGAACTTCAACGATCCGCTTACAATGGTCTTCGGACGAATACCTCATGTCATCTTGACCTCAAATCAGGTAGGACTACCCGCTGAACTTAA	GU550117	SH213920.06FU	amphinema-tylospora	EcM		Fungi	Basidiomycota	Agaricomycetes	Atheliales	Atheliaceae	Tylospora	JN943897	Tylospora_fibrillosa
GL28926	ID1YYUI01AX7RK	CTAGACTCGTCACCGATGAAGAACGCAGCGAAATGCGATAAGTAATGTGAATTGCAGATTTTCAGTGAATCATCGAATCTTTGAACGCACCTTGCGCTCCTTGGTATTCCGAGGAGCATGCCTGTTTGAGTGTCATTAAATCCTCAACCCCGTCCGTCGGTCGGGGCTTGGACTTTGGAGCGTGCTGGCGAAGGTCGGCTCCTCTTTAAATGCATCAGCGGAGAAAAACAAACCTTTTCTCCCCCTTCAGCGTGATAACTGTGTTGCGCTGTGGTCGCGAAAGGGTCCGCTCATAATCGTCCTCGGACAAACACCGAATCTGTTTTGACCTCAGATCAGGTAGGACTACCCGCTGAACTTAA	UDB008651	SH229868.06FU	amphinema-tylospora	EcM		Fungi	Basidiomycota	Agaricomycetes	Atheliales	Atheliaceae	Tylospora	UDB008299	Atheliaceae
GL25378	IJOVCJS01D0YNP	CTAGACTCGTCATCGATGAAGAACGCAGCGAAATGCGATAAGTAATGTGAATTGCAGATTTTCAGTGAATCATCGAATCTTTGAACGCACCTTGCGCTCCTTGGTATTCCGAGGAGCATGCCTGTTTGAGTGTCATTAAATTATCAACCCACAATCGATTTGTTTCGGTTCCGGGCTTGGACTTGGAGCGTGTGCTGGCTTAACCGTCGGCTCCTCTTAAAATGCATTAGCGAAAATCTCTTTGACTTTTCGGTCATCAGTGTGATAATACGTCTCGCTGTTGCCTGGGTTGAAGTTCGCTTACAATGGTCCGAAAGGACAACACTTACCAATTTTGACCTCAAATCAGGTAGGACTACCCGCTGAACTTAA	JX316374	SH217869.06FU	piloderma	EcM		Fungi	Basidiomycota	Agaricomycetes	Atheliales	Atheliaceae		JN032545	uncultured_fungus
GL28095	IGJRWKL02HTL75	CTAGACTCGTCAACGATGAAGAACGCAGCGAAATGCGATAAGTAATGTGAATTGCAGATTTTCAGTGAATCATCGAATCTTTGAACGCACCTTGCGCTCCTTGGTATTCCGAGGAGCATGCCTGTTTGAGTGTCATTAAATTCTCAACCCCAGCGGTTCGTTGGGGCTTGGACTTGGAGCGTGCTGGCGAAGGTCGGCTCCTCTTTAAATGCATCAGCGGAAAACGGAACTTTCCCTTCGGCGTGATAATGTCGTTGCGTCGTGGTGGGTCGGTTAAAGAGTCCCGCTTACAATCGTCCTCGGACAAAAATAAAAAACATCTGTTTTGACCTCAGATCAGGTAGGACTACCCGCTGAACTTAA	EU292237	SH229873.06FU	amphinema-tylospora	EcM		Fungi	Basidiomycota	Agaricomycetes	Atheliales	Atheliaceae		AB254399	uncultured_ectomycorrhizal_fungus
GL32004	ID1YYUI01A6PC7	CTAGACTCGTCATCGATGAAGAACGCTGCGAAATGCGATAAGTAATGTGAATTGCAGATTTTCAGTGAATCATCGAATCTTTGAACGCACCCTGCGCTCCTTGGTATTCCGAGGAGCATGCCTGTTTGAGTGTCATTAAATTCTCAACCCCAGCGGTTCGTTGGGGCTTGGACTTGGAGCGTGCTGGCGAAGGTCGGCTCCTCTTTAAATGCATCAGCGGAAAAACGAACTTTTCCCTTCAGCGTGATAATCCTGTTGCGCTGTGGTGGGTCAAGGTCCCGCTCACAATCGTCCTCGGACAAAAGACACATCTGTTTTGACCTCAGATCAGGTAGGACTACCCGCTGAACTTAA	DQ233877	SH229870.06FU	amphinema-tylospora	EcM		Fungi	Basidiomycota	Agaricomycetes	Atheliales	Atheliaceae		FR877518	uncultured_ectomycorrhizal_fungus
GL26336	ID1YYUI01EPDAD	CTAGACTCGTCATCGATGAAGAACGCAGCGAAATGCGATAAGTAATGTGAATTGCAGAATTCAGTGAATCATCGAATCTTTGAACGCACCTTGCGCTCCTTGGCATTCCGAGGAGCATGCCTGTTTGAGTGTCACGTGAAACCCTCACCCCTGCGATGTCAAAGTCGTGGATGGTGGATTTGGACGCTGCCGTCGTTGGCTCGTCTCGAAATGCATTAGCCGTGCGCGTCGCGCCAGCGCCTCTCGGTGTGATAATTATCTACGCCGCTCAGAGTGCCAGTGCCCAAGACCGTGGCTCATAGTCGTCTTCGGACAATTCACTTTAACGCTCTGGCCTCAAATCAGGTAGGACTACCCGCTGAACTTAA	GQ168501	SH189911.06FU		Saprotroph		Fungi	Basidiomycota	Agaricomycetes	Auriculariales		Auricularia	HQ829337	uncultured_fungus
GL22701	IJOVCJS01DVD8Z	TCTAGAGACGCCGACCACGCCACGTATCTAGACTCGTCATCGATGAAGAACGTGGCGAAATGCGATAAGTAATGTGAATTGCAGAATTCAGTGAATCATCGAATCTTTGAACGCACCTTGCGCCCCATGGTATTCCATGGAGCATGCCTGTTTGAGTGTCACGTGAAACTATCACTCTTGTCCTGTCGCAAGACAATGTCAGGATGTGGACTTGGACTGTGCCGTAGTTGGCTCGTCTTGAAATGCATTAGCCGTGCTGGTTAGATTCGGCCACCTGGTGTGATATATGTCTACGCCTACCGTGCTGTCTCTTCCTGAGCGTGGCTCATAATCGTCGCTTGGTCGACAACACAAATTAACGCTCTGGCCTCAAATCAGGTAGGACTACCCGCTGAACTT…	KC966289	SH231179.06FU		Saprotroph		Fungi	Basidiomycota	Agaricomycetes	Auriculariales			FN610905	uncultured_fungus
GL29673	ID1YYUI01AZ6O3	CTAGACTCGTCATCGATGAAGAACGCTGCGAAATGCGATACGTAATGTGAATTGCAGAATTCAGTGAATCATCGAATCTTTGAACGCAACTTGCGCTCCTTGGTATTCCATGGAGCATGCCCGTTTGAGTGTCACGATAACCCTCATTCATGTGATTTAACGATCACATGAATGGATTTGGGTGTTGCCGTAACCGGCTCACCTTGAAATGAATTAGCTTTGCGCCCATTAGCGTGCTCGGTGTGATAATTATCATTCGCCTTAGGCCGCTTCCAGTGACGCTGCTTCTAATGGTCCCTTGTGGACAACAAATCTAAAGCATTGGCCTCAAATCGGGTAGGACTACCCGCTGAACTTAA	FN610890	SH241192.06FU		Saprotroph		Fungi	Basidiomycota	Agaricomycetes	Auriculariales			FN610890	uncultured_fungus
GL11743	ID1YYUI01DRL50	CTAGACTCGTCAACGATGAAGAACGCAGCGAATTGCGATAAGTAATGTGAATTGCAGATTTTCAGTGAATCATCGAATCTTTGAACGCACCTTGCGCTCCTTGGTATTCCGAGGAGCATGCCTGTTTGAGTGTCATTGAATTCTCAACCATGTCTCGATCGACTTCGAGGCATGGCTTGGAGTTTGGGAGTTGCTGGCGTCAAGTCAGCTATTCTGAAATACATTAGCGATGGACGAGCATGTCCTGATGTGGGCACGGCCTACCGACGTGATAATGATCGTCGTGGCTGGAGCGTTCGGACGTCGCATCTTCATGGTCTGTTTCGCTTCCAATCGAGAGTACCCTTCGAACGCTTGACCTCAAATCAGGTAGGACTACCCGCTGAACTTAA	HM146887	SH236757.06FU	boletus	EcM		Fungi	Basidiomycota	Agaricomycetes	Boletales	Boletaceae	Tylopilus	UDB016609	Tylopilus_felleus
GL20404	ID1YYUI01C4X57	TAGACTCGTCATCGATGAAGAACGCTGCGAATTGCGATATGTAATGTGAATTGCAGATTTTCAGTGAATCATCGAATCTTTGAACGCACCTTGCGCTCCTTGGTATTCCGAGGAGCATGCCTGTTTGAGTGTCATTAAATTCTCAACTCCCTTTGATTTCTTCAAAGGCGAGCTTGGATTGTGGAGGCTTTTGCCGGCTGCAAAGTCGGCTCCTCTGAAATGCATTGGCAAAGGCGTATGCATAATAACGGCTTTCGATGTGATAATGATCATCGTAGCTGGAATGCTTCACAAGTCTATGCCCAACCTGCTTTCCATTCATTTGGGAAACACTTTGACCATTTTGACCTCAAATCAGGTAGGACTACCCGCTGAACTTAA	AM747514	SH239754.06FU		Saprotroph		Fungi	Basidiomycota	Agaricomycetes	Boletales	Coniophoraceae	Coniophora	GU187518	Coniophora_sp_HHB_17606
GL22020	ID1YYUI02IKVQF	GAACGCACCTTGCGCTCCTTGGTATTCCGAGGAGCATGCCTGTTTGAGTGTCATTAAGTTCTCAACTCCCTTTGATTTCTTCAAGGGTGAGCTTGGACCGTGGAGGCTTGCCGGCTGTGAAGTCGGCTCCTCTGAAATGCATTGGCAAATGCGTGTGCATGAATCGGCCTTTCGGTGTGATAATGATCACCGTGGCTGGATTGCTTTAACGTCTATGCCCAACCTTTTCCATTTACTTGGAAAAACCCCACTTGACATTTTGACCTCAAATCAGGTAGGACTACCCGCTGAACTTAA	AM293005	SH206741.06FU		Saprotroph		Fungi	Basidiomycota	Agaricomycetes	Boletales	Coniophoraceae	Coniophora	GU187516	Coniophora_olivacea
GL06426	ID1YYUI01CKOAO	AATTGCAGATTTTCAGTGAATCATCGAATCTTTGAACGCACCTTGCGCTCCTTGGTATTCCGAGGAGCATGCCTGTTCGAGTGTCATCGAATTCTCAACCATCCTTTGATTTATTTCGAGGGGTGGCTTGGATCTTGGGAGTTGCTGGCTGATCCTAGTCGGCTCTCCTTAAAAGCATTAGCGAAAGGTGGCAAGCCCTGCATGCACGGCCTTCGACGTGATAATGATCGTCGTGGCTGGAGTGCGAGGCGTGCAGATCTAACCTTTGCTTCTAAACGATCGTAATCGGGGGACTTTTGCTTCGGCGGACGAACCTTTTTTACTTTTTCTGACGACTTGACCTCGAATCAGGTAGGACTACCCGCTGAACTTAA	JN198097	SH238254.06FU	paxillus-gyrodon	EcM		Fungi	Basidiomycota	Agaricomycetes	Boletales	Melanogastraceae	Melanogaster	JN197963	uncultured_ectomycorrhizal_fungus
GL10102	ID03IXK02HPWXJ	AACCCCTCTCGATTAGCTTCGAGGGGGAGCTTGGATAGTGGGGGTTGCTGGAGACTTGGGACTAGTTCCAGGACTCGGGCTCTCCTGAAATGCATCGGCTTGCGGTCGACTTTCGACTTTGCGCGAAAAGGCTTTCGGCGTGATAATGATCGCCGTGTGCTGAAGTGCATGAATGATGGTTCCGTGCCTCTAATACGCATCGACCTTTTACTAGGTCTTTGAAATTTGACATTTTGACCTCAAATCAGGTAGGACTACCCGCTGAACTTAA	AF062927	SH241641.06FU	suillus-rhizopogon	EcM		Fungi	Basidiomycota	Agaricomycetes	Boletales	Rhizopogonaceae	Rhizopogon	EU837230	Rhizopogon_bacillisporus|Rhizopogon|
GL12698	ID1YYUI01CIKA2	CTAGACTCGTCAACGATGAAGAACGCAGCGAAATGCGATAAGTAATGTGAATTGCAGAGTTCAGTGAATCATCGAATCTTTGAACGCACCTTGCGCTCCTTGGTATTCCGAGGAGCATGCCCGTTTGAGTGTCTTGATATCATCAAACGCCCCTGCCTTTTCCGGTGGGTCGGCGATTTGGACTTGGACGTGCTGCTGGGCGCTCTGCGCTCGGCTCGTCTTGAATGCATTAGCTGGATCTCCCTCCGGCCTCGGACCTTATGGCGTGATAAGATCACCCGTCGAGCAGTCCTTGGTCAACGTTGGGTTCCGCTTCCAACCGTCCCCCCGCGGACAACACCGAAACCTGGTTTTCGACATCTGACCTCAAATCGGGTAGGACTACCCGCTGAACTTAA	EU118607	SH218722.06FU		Saprotroph	White rot	Fungi	Basidiomycota	Agaricomycetes	Cantharellales	Botryobasidiaceae	Botryobasidium	GU054197	uncultured_fungus
GL19249	IGJRWKL02HN9PH	GACCCCTCCTTTGCTGGCGGGGGTTACGCTTGGACTTGGATGTGCTGCCGGACGGCAACGCCCGGCTCATCCCAAATGCATTAGCTGGATTTAATCCTGGCTTGGACTTTTGTTCTCACTCGGCGTGATAAGATCACCCGTCGAGGACGTCCCTTGCCCCATGGACCGGCTTCCAACCGTCCCCTCGCGGACAGATCACTTTGACAATCTGACCTCAAATCGGGTAGGACTACCCGCTGAACTTAA	EU118607	SH218722.06FU		Saprotroph	White rot	Fungi	Basidiomycota	Agaricomycetes	Cantharellales	Botryobasidiaceae	Botryobasidium	JX860438	uncultured_Botryobasidium
GL10687	IGJRWKL02H4T0S	TGTCGTGATAATCATCAAGCCCCCTCGCGCCTTTGCGAGAGGGGTCTTGGACTTGGACGCGCTGCCGGCTGGAGACGGTCGGCTCGTCCCGAAAGCATTAGCCGCTCGTCCCCCCCTGGCTTTGAGTGTTCTCACTCGGCGTGATAAGATCACCCGTCGAGGGCTCCCTTGCGCCGGGCGGCGTGGGATCGGCTTCCAACCGTCCGACAGGACAAAACTCACCTGACCATCTGACCTCAAATCGGGTAGGACTACCCGCTGAACTTAA	EU118607	SH218722.06FU		Saprotroph	White rot	Fungi	Basidiomycota	Agaricomycetes	Cantharellales	Botryobasidiaceae		UDB016395	Botryobasidium_laeve
GL13184	ID1YYUI01EII42	CTAGACTCGTCATCGATGAAGAACGCTGCGAAATGCGATAAGTAATGTGAATTGCAGAATTCAGTGAATCATCGAATCTTTGAACGCACCTTGCGCTCCTTGGTATTCCTCGGAGCATGCCTGTTTGAGTATCATGAAATTCTCAAAATAAATCTTTCGTTCATTCGATTGGTTTCATTTTGGACTTGGAGGTCTGCAGATTCACGTCTGCTCCTCTTAAATATATTAGCTGGATCTCCGTAAGCTCGGTTCCACTCGGCGTGATAAGTATCACTCGCTGAGGACACTGTAAAAGGTGGCCGGGAATGCAGACGAACCGCTTCTAATCGTCTATTGACTTAGACAATTAACTTTATGATCTGATCTCAAATCAGGTAGGACTACCCGCTGAACTTAA	FJ552883	SH215364.06FU		Saprotroph		Fungi	Basidiomycota	Agaricomycetes	Cantharellales	Ceratobasidiaceae	Ceratobasidium	JN655645	uncultured_Ceratobasidium
GL10714	ID1YYUI01ETHYK	CTAGACGCGTCACCGATGAAGAACGCAGCGAATTGCGATAAGTAATGTGAATTGCAGAATTCAGTGAATCATCGAATCTTTGAACGCACCTTGCGCTCCCTGGTATTCCGGGGAGCACGCCTGTTCGAGTGTCGTGAATACCTCAAGCTGGATGCTTTATTGCTATCTTTTGCTTGGATTTGGACTTTGCCGTAAGCCTTTAGTGGTGACGGCTGGTCTTAAATGCATTAGCTGACCCATGTTGTATATTTGGTTCTACTCGGCGTGATAAGTTCTGACCGCTGAGGACATCTGCTTTCGGGCGGATGGCCAGACATACCTTGGATTGCTTCTAATCTGTACGTCTTTGACGGACAACCTTTCAATTTTGACCTCGAATCAGGCGGGACTACCCGCTGA…	UDB008738	SH220994.06FU	clavulina	EcM		Fungi	Basidiomycota	Agaricomycetes	Cantharellales	Clavulinaceae		JF960638	uncultured_Cantharellales
GL15391	ID1YYUI01A1E1A	CTAGACTCGTCATCGATGAAGAACGCTGCGAAATGCGATAAGTAATGTGAATTGCAGAATTCAGTGAATCATCGAATCTTTGAACGCACCTTGCGCTCCCTGGTATTCCGGGGAGCACGCCTGTTCGAGCGTCATGAAGCTCTCAAACACTATCTTTTCTTAACTGAGAAGGTGGCCGTTTGGATTTGGACTCTGCCGTGTAACAAACGGCTGGTCCGAAAGATATTAGCTGATCCTAGCGAAGCTTGGTTCTACTCGGCGTGATAATTATCTGACGTCGAGGACATCGCAAGATGGCCAAAATTTGTTTTATGGATTGCTTCTAATCGTCTTCATCGACAACACATCATCAATCTGACCTCGAATCAGGTGGGACTACCCGCTGAACTTAA	KC966335	SH215068.06FU		Saprotroph	White rot	Fungi	Basidiomycota	Agaricomycetes	Cantharellales		Sistotrema	FJ820516	uncultured_fungus
GL16117	ID1YYUI01EZDWE	CCTCGTCATCGATGAAGAACGCTGCGAAATGCGATAAGTAATGTGAATTGCAGAATTCAGTGAATCATCGAATCTTTGAACGCACCTTGCGCTCCCTGGTATTCCGGGGAGCACGCCTGTTCGAGCGTCATGAAGCTCTCAAACATCTATTTTTCTTTATTGCAAAGTAGATGGTTGGATTTGGACTCTGCCGTGTAACAAACGGCTGGCCCGAAAGATATTAGCTGATCCTAGTGAGACTTGGTTCTACTCGGCGTGATAATTATCTAACGTCGAGGACATCGCAAGATGGCCAGATCAAAACTTTATGGATTGCTTCTAATCGTCTTCATCGACAAATTTTATCAATCTGACCTCGAATCAGGTGGGACTACCCGCTGAACTTAA	KC966335	SH215068.06FU		Saprotroph	White rot	Fungi	Basidiomycota	Agaricomycetes	Cantharellales		Sistotrema	HM141047	uncultured_Basidiomycota
GL14856	IGJRWKL02HQD2D	CTAGACTCGTCAACGATGAAGAACGCAGCGAAATGCGATAAGTAATGTGAATTGCAGAATTCAGTGAATCATCGAATCTTTGAACGCACCTTGCGCTCCCTGGTATTCCGGGGAGCACGCCTGTTCGAGTGTCATGAAGCTCTCAAGCTTAGATGTCTTTATTGCTGTCTAGACTTGGATTTGGACTTTGCTGTGGCCCTAGGGAAATAGCTGGTCCTAAATGCATTAGCTGGTCTTTGCGAAGGCTTGGTTCTACTTGGCGTGATAATTATCTATCGTCAAGGACACTCTTTCACGAGGGTGGCCAGACTCTCCTGGGACTGCTTCTAATCGTCTTTGGACAATTATTCATGGATCTGACCTCGAATCAGGCGGGACTACCCGCTGAACTTAA	JN889801	SH211495.06FU	cantharellus	EcM		Fungi	Basidiomycota	Agaricomycetes	Cantharellales			EU668935	uncultured_ectomycorrhiza_(Sistotrema)|Sistotrema|
GL16204	ID03IXK02FUCP9	CTAGACTCGTCATCGATGAAGAACGTGGCGAAATGCGATAAGTAATGTGAATTGCAGAATTCAGTGAATCATCGAATCTTTGAACGCACCTTGCGCTCCCTGGTATTCCGGGGAGCACGCCTGTTCGAGTGTCATGAAGCTCTCAAATGGAATCCTTTATTGTGATTTTTCATTTGGATTTGGACTCTGCTGTGGTTAAATACAGCTGGTCTTAAAAGTATTAGCTTGGTCCTTGATAATCTTGGTTCTACTCGGCGTGATAATTATCTAACGTTGAGGACATTTCTTTATTGAGATGGCCAGAATTGTTTAAGAACTGCTTCTAACCGTCTTCGGACATAACACTTTCAAATCTGACCTCGAATCAGGTGGGACTACCCGCTGAACTTAA	FJ197954	sequence missing from global key		Saprotroph		Fungi	Basidiomycota	Agaricomycetes	Cantharellales			GU328620	uncultured_Basidiomycota
GL17813	ID03IXK02IWMKI	CTAGACTCGTCATCGATGAAGAACGCGGTGAAATGCGATAAGTAATGTGAATTGCAGAATTCAGTGAATCATCGAATCTTTGAACGCACCTTGCGCTCCCTGGTATTCCGGGGAGCACGCCTGTTCGAGTGTCATGAAACTATCAAGTCAGATCCTTTATTGAATCTGACTTGGATTTGGGCTCTGCCGTGTCTTTCAATAGGTACGGCTGGTCTTAAAAGTATTAGCTGGCCTTTGCGAAGGCTTGGTTCTACTCGGCGTGATAATTATCTAACGTCGAGGACACTCTTCGGAGTGGCCAGGTCATCCAATAGACTGCTTCTAATCGTCTTAGGACAATTTTCTAAATCTGACCTCGAATCAGGTGGGACTACCCGCTGAACTTAA	UDB005808	SH211496.06FU	cantharellus	EcM		Fungi	Basidiomycota	Agaricomycetes	Cantharellales			JN032502	uncultured_fungus
GL20405	ID1YYUI01ES58Q	CTAGACTCGTCATCGATGAAGAACGCTGCGAAATGCGATAAGTAATGTGAATTGCAGAATTCAGTGAATCATCGAATCTTTGAACGCACCTTGCGCCCCTTGGTTTTCCGAGGGGCATGCCTGTTTGAGTGTCATGTTTATCTCAATCTCCTTGTCTTCTTAATTGAAGTCTCGGGGCTTGGATTTGGAGGCCTTGCTGGCAGTTATGTCGGCTCCTCTTAAATACATTAGCTGGACTTTGGTTCGCGTTACTGGTGTAATAGATTTATGTTCGCCAGACGCTTGCCTAATGGGTCTGCTTCTAATCGTCTTCGGACAAGGTCTTTGACCTTCTTGACACCTTTGACCTCAAATCAGGTAGGACTACCCGCTGAACTTAA	AY624992	SH220911.06FU		Saprotroph	White rot	Fungi	Basidiomycota	Agaricomycetes	Hymenochaetales	Hymenochaetaceae	Mensularia	JX082384	Mensularia_radiata
GL16933	ID1YYUI01BC66J	CTAAGACTCGTCACCGATGAAGAACGCAGCGAAATGCGATAAGTAATGTGAATTGCAGAATTCAGTGAATCATCGAATCTTTGAACGCACCTTGCGCTCCTTGGTATTCCGAGGAGCATGCCTGTTTGAGTGTCATGATCACCTCACTTCCAACGGCTTTGTTGTCGTATTTGGAACGTGGATTTGGAGGCTTGCTGGCCCTAACTTATACGTGGGTCGGCTCCTCTTGAATGCATTAGCTGGACGTTGTCGCGCGTTTGTGGTGTGATAGGTTTTTATTCACCTCGGACAAGTGGCATTAGCGTTTGCTTCTAATCGTCCCTTTGTGGACAAACTTAACATCTTGACTTTGACCTCAAATCAGGTAGGACTACCCGCTGAACTTAA	JX110073	SH232605.06FU		Saprotroph	White rot	Fungi	Basidiomycota	Agaricomycetes	Hymenochaetales	Hymenochaetaceae		AY781275	basidiomycete_sp_olrim302
GL16879	ID1YYUI01B7EAK	TCTAGACTCGTCATCGATGAAGAACGTAGCGAAATGCGATAAGTAATGTGAATTGCAGAATTCAGTGAATCATCGAATCTTTGAACGCACCTTGCGCTCCTTGGTATTCCGAGGAGCATGCCTGTTTGAGTGTCATGAAATTCTCAACCTCTTCTTGCTTTGCGGCTCGAAGTAGGCTTGGATTTGGGAGCTTGCTGGTTTCACAATCGGCTCTCCTTGAATGCATTAGCTGGACTTTCCGATTTAATAGCGGTTCACGGTGTGATAACTATCTACGCCTGGTAAATCCGTCTTTAAGTCTGGTCGAGCTTCTAATCAGTTCGTCCTTTGCTGGACAAACACTTTTAAGATCTGACCTCAAATCAGGTAGGACTACCCGCTGAACTTAA	UDB011606	SH201024.06FU		Saprotroph		Fungi	Basidiomycota	Agaricomycetes	Hymenochaetales	Repetobasidiaceae	Rickenella	JQ694100	Rickenella_fibula
GL17941	IJOVCJS01DSXYK	TCGTCAACGATCAAGAACGCAGCGAAATGCGATAAGTAATGTGAATTGCAGAATTCAGTGAATCATCGAATCTTTGAACGCACCTTGCGCTCCTTGGTATTCCGAGGAGCATGCCTGTTTGAGTGTCATGAAATCATCAACCCCCTTTTCTTTCTCTTCGGAGACTTTGGAGGTGGCTTGGACTTGGGGATCTGCTGGCCCTTCGGGATCGGCTTCCCTTGAATGCATTAGCCAGACTTCGGTTCGCAGCAGCTTAGCGGTGTGATAATATCTTCACTGCGGCTGGCTCGGCAGTGTCAAGTTCGGCTTCTAACCGTCCGTCTCAGACACTTCATTGACAATCTGACCTCAAATCAGGTAGGACTACCCGCTGAACTTAA	DQ340311	SH227691.06FU		Saprotroph	White rot	Fungi	Basidiomycota	Agaricomycetes	Hymenochaetales	Schizoporaceae	Hyphodontia	FJ820648	uncultured_fungus
GL25990	IGJRWKL02GN18S	CTAGACTCGTCACCGATGAAGAACGCAGCGAAATGCGATAAGTAATGTGAATTGCAGAATTCAGTGAATCATCGAATCTTTGAACGCACCTTGCGCTCCTTGGTATTCCGAGGAGCATGCCTGTTTGAGTGTCATGAAATCATCAACCTTACTGTCTTTGTTGACGGTGTAGGCTTGGACTTGGGGACCTTGCCGGCCTTTCTGAGGTCGGCTTCCCTTGAATGTATTAGTCGAGCGCCCTCGCTCCGAGACGTGTGATAATTATCATTCACTGATCGACGAGGGCTGTGCTAGGCTTCTAACCGTCGCGTTAGTGACAATCTTGACAATCTGACCTCAAATCAGGTAGGACTACCCGCTGAACTTAA	UDB016322	SH218834.06FU		Saprotroph	White rot	Fungi	Basidiomycota	Agaricomycetes	Hymenochaetales	Schizoporaceae	Hyphodontia	UDB016322	Hyphodontia_pallidula
GL23283	ID1YYUI01C6UXZ	CTAGACTCGTCAACGATGAAGAACGCAGCGAAATGCGATAAGTAATGTGAATTGCAGAATTCAGTGAGTCATCGAATCTTTGAACGCACCTTGCGCTCCCTGGTATTCCGGGGAGCATGCCTGTTTGAGTGTCGTGAAATCATCATGGTCATGATCTTTAATTAATCATGGCTTGGTTTTGGAGGTTATGTTGGCTTTTTATTAAGTTGACTCCTCTTAAATACATTAGCTCAGTGTTTAATGCTTAGAGCGGTTCACGGTGTGATAATTATCTACACTTCAACCAATTTAAGTTAGCTGGCTTCTAATCGATCCTTAGTGATCACTTTGTGTATTTGACCTCAAATCAGGTAGGACTACCCGCTGAACTTAA	DQ218310	SH229994.06FU		Saprotroph	White rot	Fungi	Basidiomycota	Agaricomycetes	Hymenochaetales		Resinicium	JQ780619	Resinicium_bicolor
GL25593	ID1YYUI01CSUO0	CTAGACTCGTCATCGATGAAGAACGCTGCGAAATGCGATAAGTAATGTGAATTGCAGAATTCAGTGAATCATCGAATCTTTGAACGCACCTTGCGCCCTTTGGTAATCCGAGGGGCATGCCTGTTTGAGTGTCTTGAAGCTCTCAAACATTTATTTACTTAAATGTTTGGATTTGGGTGTTCTTTGCCGGTCGCAAGATCGGCTCACCCTAAACGCATTAGCTGGCTTTTGGGTCCGCGAACTCGGTGTGATAATTGTCACTCGCTGGGATTTTCGTAACCTTAAGGAAGCTGCTTCCAATCGTCTCCTCGTGAGACAATACATCTAAGTGTTTGACCTCAAATCAGGTAGGACTACCCGCTGAACTTAA	GU559102	SH213958.06FU				Fungi	Basidiomycota	Agaricomycetes	Hymenochaetales			JN032549	uncultured_fungus
GL08509	ID1YYUI01BCXC1	CTAGACCGTCATCGATGAAGAACGCTGCGAAATGCGATAAGTAATGTGAATTGCAGAATTCAGTGAATCATCGAATACTTTGAACGCACCTTGCGCTCCTTGGTATTCCGAGGAGCATGCCTGTTTGAGTGTCATGGAATCATCAACTCTTATCCTTTCTTTGTTGAGAGGATGAGGGCTTGGACTTGGAGGTTTCTGCTGGTCCGTCTTTGTAAAAGAAGATGGTCGGCTCCTCTTGAATGCATTAGCTTGAACCTCTGCTGTATCGGCTGTCCAGTGTGATAATTGTCTACGCTGTGGCTGTGAGGCGTTTTAGTGGGCTCGGCTTCTAACCGTCTTCTTACGGAGACAACAACATTCGTTACGAATGACCTCTGACCTCAAATCAGGTAGGATTAC…	AM902080	SH203223.06FU		Saprotroph		Fungi	Basidiomycota	Agaricomycetes	Polyporales	Fomitopsidaceae	Postia	JF950576	Postia_ptychogaster
GL22593	IGJRWKL02FOIRM	CTAGACTCGTCATCGATGAAGAACGCTGCGAAATGCGATAAGTAATGTGAATTGCAGAATTCAGTGAATCATCGAATCTTTGAACGCACCTTGCGCTCCTTGGTATTCCGAGGAGCATGCCTGTTTGAGTGTCATGAAATCTTCAACTTTACGAGCTTCTTGCGAGGTTTGTAGGGTTGGACTTGGAGGCTTGTCGGTCTTTAAAGGTCGGCTCCTCTTAAATGCATTAGCTTGGTTCCTTGCGGATCGGGTTGTCGGTGTGATAATGTCTACGCCGCGACCGTGAAGCGTTTGGCAAGCTTCTAACCGTCTCGGTATAGAGACAAGTTTTATGACCTCTGACCTCAAATCAGGTAGGACTACCCGCTGAACTTAA	GU731554	SH232520.06FU		Saprotroph	White rot	Fungi	Basidiomycota	Agaricomycetes	Polyporales	Ganodermataceae	Ganoderma	JN588586	Ganoderma_adspersum
GL18451	IGJRWKL02I0V8K	CTAGACTCGTCATCGATGAAGAACGCTGCGAAATGCGATAAGTAATTGTGAATTGCAGAATTCAGTGAATCATCGAATCTTTGAACGCACCTTGCGCTCCTTGGTATTCCGAGGAGCATGCCTGTTTGAGTGTCATGAAATCTTCAACCTATAAGCTTTTGTGGTTTGTAGGCTTGGACTTGGAGGCTTGTCGGCCTTGATCGGTCGGCTCCTCTTAAATGCATTAGCTTGATTCCTTGCGGATCGGCTCTCGGTGTGATAATATCTACGCCGCGACCGTGAAGTGTTTGGCGAGCTTCTAACCGTCTCACTTGAGAGACAACTTTATGACCTCTGACCTCAAATCAGGTAGGACTACCCGCTGAACTTAA	JN176900	SH203365.06FU		Saprotroph	White rot	Fungi	Basidiomycota	Agaricomycetes	Polyporales	Ganodermataceae	Ganoderma	JQ666446	uncultured_soil_fungus
GL21786	ID1YYUI01B9MUY	TCTAGACTCGTCATCGATGAAGAACGCGGCGAAATGCGATAAGTAATGTGAATTGCAGAATTCAGTGAATCATCGAATCTTTGAACGCACCTTGCGCTCCTTGGTATTCCGAGGAGCATGCCTGTTTGAGTGTCATGAAATCTTCAACTTACGAGCTTCTTGCGAGGTTTGTAGGGTTGGACTTGGAGGCTTGTCGGTCTTTAAAGGTCGGCTCCTCTTAAATGCATTAGCTTGGTTCCTTGCGGATCGGGTTGTCGGTGTGATAATGTCTACGCCGCGACCGTGAAGCGTTTGGCAAGCTTCTAACCGTCTCGGTATAGAGACAAGTTTTATGACCTCTGACCTCAAATCAGGTAGGACTACCCGCTGAACTTAA	GU731554	SH232520.06FU		Saprotroph	White rot	Fungi	Basidiomycota	Agaricomycetes	Polyporales	Ganodermataceae	Ganoderma	JN588584	Ganoderma_adspersum
GL22334	ID03IXK02GLIQI	CTAGACTCGTCATCGATGAAGAACGCAGCGAAATGCGATAAGTAATGTGAATTGCAGAATTCAGTGAATCATCGAATCTTTGAACGCACCTTGCGCTCCTTGGTATTCCGAGGAGCATGCCTGTTTGAGTGTCATGAAATCTTCAACCTACAATCTCTTTGCGGTTTTTGTAGGCTTGGACTTGGAGGCTTGTCGGTCTTTTATTGATCGGCTCCTCTCAAATGCATTAGCTTGGTTCCTTTGCGAATCGGCTTGTCGGTGTGATAATGTCTACGCCGCGACCGTGACGCGTTTGGCGAGCTTCTAACCGTCCCGTTATTGGGACAACTCTTATGACCTCTGACCTCAAATCAGGTAGGACTACCCGCTGAACTTAA	KF164430	SH203368.06FU		Saprotroph	White rot	Fungi	Basidiomycota	Agaricomycetes	Polyporales	Ganodermataceae	Ganoderma	JN400512	Ganoderma_sp_BP_4
GL24978	IGJRWKL02G9Y3F	CTAGACTCGTCACCGATGAAGAACGCTGCGAAATGCGATAAGTAATGTGAATTGCAGAATTCAGTGAATCATCGAATCTTTGAACGCACCTTGCGCTCCTTGGTATTCCGAGGAGCATGCCTGTTTGAGTGTCATGAAATCTTCAACCTACAAGCCTTTGCGGTTTGTAGGCTTGGACTTGGAGGCTTGTCGGCCCTTTGTCGGTCGGCTCCTCTTAAATGCATTAGCTTGATTCCTTGCGGATCGGCTCTCGGTGTGATAATGTCTACGCCGCGACCGTGAAGCGTTTGGCGAGCTTCTAACCGTCTTCGCTTGAAGACAGCTTTATGACCTCTGACCTCAAATCAGGTAGGACTACCCGCTGAACTTAA	JN176899	SH215538.06FU		Saprotroph	White rot	Fungi	Basidiomycota	Agaricomycetes	Polyporales	Ganodermataceae	Ganoderma	JQ781853	Ganoderma_tsugae
GL24997	ID1YYUI01DUDPR	CTAGACTCGTCATCGATGAAGAACGCAGCGAAATGCGATAAGTAATGTGAATTGCAGAATTCAGTGAATCATCGAATCTTTGAACGCACCTTGCGCTCCTTGGTATTCCGAGGAGCATGCCTGTTTGAGTGTCATGGAATTCTCAACCTTCAACACTTTTGTGAAGAAGGCTTGGACTTGGAGGCCGTGTGGGCTGGCAACAGTCGACTCCTCTGAAATGTATTAGTTGCGAACCTTACGGATCGCTTCGGTGTGATAATTGTCTACGCCGTGGTGTTGAAGTATAGCAGTGTTCGAGCTTCTAACAGTCCGCAAGGACAATTTTTTGACAATCTGACCTCAAATCAGGTAGGACTACCCGCTGAACTTAA	UDB016325	SH216653.06FU		Saprotroph	White rot	Fungi	Basidiomycota	Agaricomycetes	Polyporales	Meruliaceae	Mycoacia	JN649352	Mycoacia_fuscoatra
GL27164	ID03IXK02GZOGL	GAATAAAAAGAGGCAGCTGGGCTTGGATTTGGAGGTTTTTGCCGGTGTTCTTGAACACGGGCTCCTCTGAAATGCATTAGCTTGAATGTGACCGAGCATGGTTCAACGTGATAATTGTCTGCGTTGCTTCATCTCAGTCTTCATCTTGTTCAGGCTTCTAACCGTCCGTAAGGACAACATCATCTGAACATCTGACCTCAAATCAGGTAGGACTACCCGCTGAACTTAA	FR682444	SH234165.06FU		Saprotroph	White rot	Fungi	Basidiomycota	Agaricomycetes	Polyporales	Meruliaceae	Steccherinum	FR682444	uncultured_Basidiomycota
GL20928	ID03IXK02FMW9N	CTAGACTCGTCACCGATGAAGAACGCAGCGAAATGCGATAAGTAATGTGAATTGCAGAATTCAGTGAATCATCGAATCTTTGAACGCACCTTGCACTCCTTGGTATTCCGAGGAGTATGCCTGTTTGAGTGTCATGAAATTATCAACTTCATAGTTTTATTACTTTGAAGCTTGGATTTGGAAGCTTGCTGGCTCTCTAGTCAGCTCTTCTTAAATGTATTAGCTGCTTGTCCGTGGGTTGGCTCAGAGTGTGATAAGTATCTACACTTGGTGGCTGCTTGCTTGGATGTGGCTTCTAATTGTCTTCGGACAACTCTTTAAGATCTGACCTCAAATCAGGTAGGACTACCCGCTGAACTTAA	FJ475670	SH203418.06FU		Saprotroph	White rot	Fungi	Basidiomycota	Agaricomycetes	Polyporales	Xenasmataceae	Xenasmatella	FJ475672	uncultured_Polyporales
GL25919	IJOVCJS01A8C7E	CTAGACTCGTCACCGATGAAGAACGCAGCGAAATGCGATAAGTAATGTGAATTGCAGAATTCAGTGAATCATCGAATCTTTGAACGCACCTTGCGCCCCTTGGCATTCCGAGGGGCACGCCTGTTTGAGTGTCGTGAACTCCTCCACCCTCCACCTTTTCGAAAGGCGTTGGGCTGGGATTTGGGAGCTTGCGGGTCCCTGGCCGATCCGCTCTCCTTGAATACATTAGCGAAGCCCTTGCGGCCTTGGTGTGATAGTCATCTACGCCTCGGTTTAGCGAACATACGGGAATCGCTTCCAACCGTCTCGCAAGAGACAATCACTTCAAACTTGACCTCAAATCAGGCGGGACTACCCGCTGAACTTAA	DQ350127	SH234592.06FU		Saprotroph	White rot	Fungi	Basidiomycota	Agaricomycetes	Russulales	Peniophoraceae	Peniophora	JN545771	Peniophora_sp_SB9350a
GL25999	ID1YYUI01DMX89	CTAGACTCGTCATCGATGAAGAACGTGGCGAAATGCGATAAGTAATGTGAATTGCAGAATTCAGTGAATCATCGAATCTTTGAACGCACCTTGCGCCCCTTGGCATTCCGAGGGGCACGCCTGTTTGAGTGTCGTGAACTCCTCCACCCTCCACCTTTTTCGGAAGGCGTTGGGCTGGGATTTGGGAGCTTGCGGGTCCCTGGCTGATCCGCTCTCCTTGAATACATTAGCGAAGCCCTTGCGGCCTTGGTGTGATAGTCATCTACGCCTCGGTTTAGCGAACATACGGGAATCGCTTCCAACCGTCTCGCAAGAGACAATCACTTCAAACTTGACCTCAAATCAGGCGGGACTACCCGCTGAACTTAA	DQ350127	SH234592.06FU		Saprotroph	White rot	Fungi	Basidiomycota	Agaricomycetes	Russulales	Peniophoraceae	Peniophora	JX046435	Peniophora_lycii
GL01893	ID1YYUI01BCGYG	CTAGACTCGTCATCGATGAAGAACGCTGCGAAATGCGATACGTAATGTGAATTGCAGAATTCAGTGAATCATCGAATCTTTGAACGCACCTTGCGCCCCTTGGTATTCCGAGGGGCACACCCGTTTGAGTGTCGTGAAAATCTCAACCTTCTCGGTTTCTTCTGGACACCGAAGGAGGCTTGGACTTTGGAGGCCTTTGCTGGTGTCTCTCTCTTCTGAAACCCAGCTCCTCTTAAATGAATTAGCGGGGTCCTCTTTGCTGATCCTCGACGTGTGATAAGATGTTTCCATGTCTTGGTTTCTGGCTCTGTTGCTCCTGGGATCCGCTTCTAATCGTCTCAACCTTGCATCGAGACAACGTTTGAGCGTGTCTCCCTTCTCGGGAAACGCTCTCAACCC…	UDB000835	SH238105.06FU	russula-lactarius	EcM		Fungi	Basidiomycota	Agaricomycetes	Russulales	Russulaceae	Lactarius	UDB011531	Lactarius_scrobiculatus
GL00430	IJOVCJS01A7MSZ	CTAGACTCGTCACCGATGAAGAACGCAGCGAAATGCGATACGTAATGTGAATTGCAGAATTCAGTAAGAATCATCGAATCTTTGAACGCACCTTGCGCCCCTTGGTATTCCGAGGGGCACACCCGTTTGAGTGTCGTGAAAATCTCAACCTCCTCGGTTTCTTCTGGACGCCGAAGGAGGCTTGGACTTTGGAGGCCTTTGCTGGCGTCTCTCGCCAGCTCCTCTCAAATGAATTAGCGGGGTCCTCTTTGCCGATCCTCGACGTGTGATAAGATGTTTCCATGTCTTGGTTTCTGGCTCTGTCGCCTTTGGGACCCGCTTCTAACCGTCTCAAGTCGAGACAACGTTTGAGCGTGTCTCCCTTCTCGGGAAACACCCTCGAGCCCACGAACCCTTGAC…	UDB001606	SH238107.06FU	russula-lactarius	EcM		Fungi	Basidiomycota	Agaricomycetes	Russulales	Russulaceae	Lactarius	UDB018157	Lactarius_pilatii
GL04107	IJOVCJS01CBKP5	TTGCAGAATTCAGTGAATCATCGAATCTTTGAACGCACCTTGCGCCCCTTGGTATTCCGAGGGGCACACCCGTTTGAGTGTCGTGAAAATCTCAACCTTCTCGGTTTCTTCTGGACACCGAAGGAGGCTTGGACTTTGGAGGCCTTTGCTGGTGTCTCTCTCTTCTGAAACCCAGCTCCTCTTAAATGAATTAGCGGGGTCCTCTTTGCTGATCCTCGACGTGTGATAAGATGTTTCCATGTCTTGGTTTCTGGCTCTGTTGCTCCTGGGACCCGCTCCTAACCGTCTCAACCTTGCATCGAGACAACGTTTGAGCGTGTCTCCCTTCTCGGGAAACGCTCTCAACCCCACGAACCCTTGACCTCAAATCGGGTGAGACTACCCGCTGAACTTAA	UDB000835	SH238105.06FU	russula-lactarius	EcM		Fungi	Basidiomycota	Agaricomycetes	Russulales	Russulaceae	Lactarius	UDB016033	Lactarius_tuomikoskii
GL04366	ID1YYUI01A2HPX	CTAGACTCGTCATCGATGAAGAACGCAGCGAAATGCGATACGTAATGTGAATTGCAGAATTCAGTGAATCATCGAATCTTTGAACGCACCTTGCGCCCCTTGGTATTCCGAGGGGCACACCCGTTTGAGTGTCGTGAAAACCTCAACCTCCTTGGTTTCTTCTGGAGACCAAAGGAGGCTTGGACTTTGGAGGCCTTTGCTGGCGTCTCTCTTTTGAAGGCCAGCTCCTCTCAAACAAATTAGCGGGGTCCTCTTTGCCGATCCTCGACATGTGATAAGATGTTTCCGTGTCTTGGTTTCTGGCTCTGTTGCTTTTGGGATCCGCTTCAAACCGTCTCGAGCTTGCATCGAGACAATGTTCGAGCTTGTCTCCCTTCTCGGGAAACTCTCTCGACCCCA…	UDB001597	SH193881.06FU	russula-lactarius	EcM		Fungi	Basidiomycota	Agaricomycetes	Russulales	Russulaceae	Lactarius	UDB015739	Lactarius_helvus
GL03725	ID03IXK02F4X5V	TCTTTGAACGCACCTTGCGCCCCTTGGCATTCCGAGGGGCACACCCGTTTGAGTGTCGTGAAATCCTCAAAACCCTCTTCTTTCGGGAAAAGGTGTTTTGGACTTGGAGGTTCAATGCTCGCTTTCCTCTTTGAGAGCGAGCTCCTCTCAAATGAATCAGTGGGGTCTGCTTTGCTGGTCCTTGACGTGATAAGATGTTTCTACGTTTTGGATTTGGCATCGTCCCTTGGATGCCCCCGCTCCTAATCGTCTCATGGACAATGATGGTGCTTCCGGTCACCGCCGATCCACATCGGCGGGAGGCTGGACCCACAAAAAAAACCTTGACCTCAAATCGGGTGAGACTACCCGCTGAACTTAA	UDB002549	SH214434.06FU	russula-lactarius	EcM		Fungi	Basidiomycota	Agaricomycetes	Russulales	Russulaceae	Russula	HM164620	uncultured_fungus
GL04776	ID1YYUI01AXHVO	CTAGACTCGTCACCGATGAAGAACGCAGCGAAATGCGATACGTAATGTGAATTGCAGAATTCAGTGAATCATCGAATCTTTGAACGCACCTTGCGCCCCTTGGCATTCCGAGGGGCACACCCGTTTGAGTGTCGTGAAATCCTCAAAAACCCTTTTCTTGTCAGGAATGGGATTTTTGGACTTGGAGGTTCAATGCTCGCCTTTCACCTTTGAAAGTGAGCTCCTCTCAAATGAATTAGTGGGGTCCGCTTTGCTGATCCTTAACGTGATAAGATGCTTCTACGTTTTGGATCTAGCACTGTCCCTTGGATGCCTGCTCCTAACTGTCCCACACGGACAATGATGGTGCTCTGGTCACCGCCATTTACATTGGCGGGAGGCTGGACCCACAAAACAAAA…	UDB018813	SH207710.06FU	russula-lactarius	EcM		Fungi	Basidiomycota	Agaricomycetes	Russulales	Russulaceae	Russula	HQ022076	uncultured_Russula
GL09076	IJOVCJS01B5DYW	CTTTTGGTCGGGAAAAGGATTTTTGGACTTGGAGGTTCTATGCTCGCTTTTGAAAGCGAGCTCCTCTCAAATGAATTAGTGGGGTCTGCTTTGCTGATCCTTGACGTGATAAGATGTTTCTACGTTTTGGATTTGGCACTGTCCCTTGGACGCCTGCTCCTAACCGTCTGTTGGACGACGATGGTGCTTCGGTCACTGCCATCTACATTGGCGGGAGGCTGGACCCGCAAAAAAGACCTTGACCTCAAATCGGGTGAGACTACCCGCTGAACTTAA	AJ633114	SH208373.06FU	russula-lactarius	EcM		Fungi	Basidiomycota	Agaricomycetes	Russulales	Russulaceae	Russula	UDB011326	Russula_decolorans
GL09167	ID1YYUI01AXR30	ACCCCTTGGTATTCCGAGGGGTACGCCTGTTTGAGTGTCGTGAATTCCTCCACTCGACCGCTTTGCTGTGTGTCGGGCTGGGATGTTGGGGGTGTTTTGCAGGTCCCTTTCGAGGTCTGCTCCCCTTGAATGCATTAGTGAGGTTCGGCGCTCGGCCTCGACGTGATAAGTCTATCTACGTCGTGTCCGGTGCTTTGTTTGTCCTGGTCAGCCAGGGAAAAACGGGACTTTGCTTCCAACCGTCTTCGGACAACCGTGCGCTCGCGCACAACCTTCGAACTCGACCTCAAATCAGGTGGGACTACCCGCTGAACTTAA	DQ421987	SH203972.06FU		Saprotroph	White rot	Fungi	Basidiomycota	Agaricomycetes	Russulales			JN225959	Corticiaceae_sp_4_ICMP_18852
GL15618	IJOVCJS01CVQU0	CTAGACTCGTCATCGATGAAGAACGTAGCGAAATGCGATAAGTAATGTGAATTGCAGAATTCAGTGAATCATCGAATCTTTGAACGCACCTTGCACCCTTTGGTATTCCGAAGGGTACACCCGTTTGAGTGTCATTGTAATCTCACCTCTTCGACTCTTTATCGGGTCGACCAGTGTGGACTTGGATGTTGCCGTGTCACAAACGGCTCGTCTGAAATGCCTTAGTGTACCCTGCTTTGCGGCGTATTCGGTGTGATACATCTTCACCGGAGTCTCGACTTTTGGGTCGGCGCTTGTATGGTTTTGGCTCTATGCTTTCCAACCGTCCCTGACAAGGACAAAATACTCTGACAATTTGACCTCAAATCGGGTGGGACTACCCGCTGAACTTAA	GQ907100	SH202272.06FU		Saprotroph		Fungi	Basidiomycota	Agaricomycetes	Sebacinales			GQ907100	uncultured_Sebacina
GL15831	ID1YYUI01DJEHB	TAGTATCTAGACTCGTCAACGATGAAGAACGCAGCGAAATGTGATAAGTAATGTGAATTGCAGAATTCAGTGAATCATCGAATCTTTGAACGCACCTTGCACCCTTTGGTATTCCAAAGGGTACACCCGTTTGAGTGTCATTGTAATCTCACCTCATCAGCTTTTGTTGATGGAGGTGGACTTGGACTCTGTTGTGTCATTACAACTGGTCTGAAATGTGTGAGTGCACCCTGCTGTTGCAGCGTCCTCAGTGTGATAAGCATCTTCACTGAATCAAGTTCCTTTGGGACACGTGTGTAATGTGGGCTCTGTGCTGGCAAACTGTCTTTGGACAATCTTGACAATTTGACCTCAGATCGAGTGGGACTACCCGCTGAACTTAA	FJ475624	SH215861.06FU		Saprotroph		Fungi	Basidiomycota	Agaricomycetes	Sebacinales			JQ420980	uncultured_Sebacina
GL15991	IJOVCJS01CUNM2	CTAGACTCGTCATCGATGAAGAACGTAGCGAAATGCGATAAGTAATGTGAATTGCAGAATTCAGTGAATCATCGAATCTTTGAACGCACCTTGCACCCTTTGGTATCCCGAAGGGTACACCCGTTTGAGTGTCATTGTAATCTCACCTCTTCGACACTTTGTTGTCGACCAGTGTGGACTTGGATGGTGTCGTGTGACAAACGACTCGTCTGAAATGCCTGAGTGTACCCTGCTTTGCGGCGTATTCGGTGTGATACATCTTTCACCGGAGTCTCGACCTTTGGGTCGGCGCTCGTATGGTTTTTGGCTCTATGCTTTCGAACCGTCCCTGACAAGGACAATGACTATGACAATTTGACCTCAAATCGGGTGGGACTACCCGCTGAACTTAA	AM999695	SH202278.06FU		Saprotroph		Fungi	Basidiomycota	Agaricomycetes	Sebacinales			GQ907085	uncultured_Sebacina
GL17352	ID03IXK02HU1DI	CTAGACTCGTCATCGATGAAGAACGCAGCGAAATGCGATAAGTAATGTGAATTGCAGAATTCAGTGAATCATCGAATCTTTGAACGCACCTTGCACCCTTTGGTATGCCAAAGGGTACACCCGTTTGAGTGTCATTGTAATCTCACTACGATTGACTTTGTCGTCTTTCTGTATGTGGACTTGGATGTTGTCGTAGGATATCCACGACTCGTCTGAAATGCTTGAGTGTACCCTGCTTTGCGGCGTATTCGGTGTGATACATCTTCACCGGAGTTGATCCTTTTGGGTCGCGTCTATACAAGTGTGGCTCTATGCTTCCAACCGTCTTCCAGGAGACAATGTTTGACAATTTGACCTCAAATCGGGTGGGACTACCCGCTGAACTTAA	DQ309105	SH203712.06FU		Saprotroph		Fungi	Basidiomycota	Agaricomycetes	Sebacinales			JN032518	uncultured_fungus
GL22832	ID03IXK02GF60A	CTAGACTCGTCATCGATGAAGAACGCTGCGAAATGCGATAAGTAATGTGAATTGCAGAATTCAGTGAATCATCGAATCTTTGAACGCACCTTGCACCCTTTGGTAATCTGAAGGGTACACCCGTCTGAGTGTCATTGTAATCTCACTCCACCGACTTTTGTTGATGGATGTGGACCTGGACTCTGTTGTGTTACTACGACTGGTCTGAAATGCCTGAGTGCACCCTGCTGTTGCAGCGTTTTCAGTGTGATAAGCATCTTCACTGGATCAAGTTCCCTTGGGACACGTATGCATTGTGGGCTCTGTGCTGCAAACCGTCTTTGGACAAGCTTGACAATTTGACCTCAGATCGGGTGGGACTACCCGCTGAACTTAA	FN663640	SH214708.06FU		Saprotroph		Fungi	Basidiomycota	Agaricomycetes	Sebacinales			JQ272332	Sebacinales_sp_1_RB_2011
GL25140	ID1YYUI01BLJRA	GACTCGTCATCGACGAAGAACGCAGCGAAATGCGATAAGTAATGTGAATTGCAGAATTCAGTGAATCATCGAATCTTTGAACGCACCTTGCACCCTTTGGTATTCCGAAGGGTACGCCCGTTTGAGTGTCATTGTAATCTCACTTCGACAACTTTATTGTTGTGGAATGTGGACTTGGATGTTGCCGTGTCATTACGGCTCGTCTCAAATGCTTGAGTGTATCCTGCTTTGCAGTGTATTCGGTGTGATAACATCTTCACCGTTCAGTCGAAAGACATACTTGCTTGTGGGCTCTATGCTTCCAACCGTCTTTGGACAATCTCTGACAATTTGACCTCAAATCGGGTGGGACTACCCGCTGAACTTAA	FJ788839	SH209713.06FU		Saprotroph		Fungi	Basidiomycota	Agaricomycetes	Sebacinales			FJ788841	uncultured_Sebacinales
GL28588	ID03IXK02F6PXS	TTTTTGTGGTTGCATGTGGACTTGGATGTTGCTGTGTCGCAAACGGCTCGTCTGAAATGCCTTAGTGTACCCCTGCTTTGCGGCGTATTCGGTGTGATAAATCTTCACCGGAGTTGACCCTCAGGGTCACGTCTGCTTGACATGGCTCTATGCTTCCAACCGTCCTGACAAGACAATCTTTGACAATTTGACCTCAAATCGGGTGGGACTACCCGCTGAACTTAA	JQ711843	SH203761.06FU	serendipita2	EcM		Fungi	Basidiomycota	Agaricomycetes	Sebacinales			JQ711843	Sebacina_vermifera
GL09395	ID1YYUI01BDBFX	CTAGACTCGTCATCGATGAAGAACGTGGCGAAATGCGATAAGTAATGTGAATTGCAGAATTCAGTGAATCATCGAATCTTTGAACGCACCTTGCGCTCCTTGGTATTCCGAGGAGCATGCCTGTTTGAGTGTCATGAAATTCTCAACTGCCTTCTTAGCATTTTATGTTGAGGGGGTGAAGTTGGAGTTGGAGGATAACTGCTGGCGCAACTCAGGTTGCTTGTTGGCTCCTCTTAAATGGATGAGCTTTTCTGATGGATCATGGCTCGGTAACACTGATGTGATAATTATCTACGTTAGATGTGAACGCCGTGAGCGGAGCGACTTTTTGAAGCTCCTACGGAAAAGGACGTCTTTTGACTTGTAACAAAATCTGACCTCAAATCAGGTAGGACTACC…	EF619790	SH239483.06FU	pseudotomentella	EcM		Fungi	Basidiomycota	Agaricomycetes	Thelephorales	Thelephoraceae	Pseudotomentella	FJ196938	uncultured_Pseudotomentella|Pseudotomentella_atrofusca|
GL13367	ID03IXK02HHFOH	CTAGACTCGTCATCGATGAAGAACGCAGCGAAATGCGATAAGTAATGTGAATTGCAGAATTCAGTGAATCATCGAATCTTTGAACGCACCTTGCGCCCCTTGGCTATTCCGAGGGGCATGCCTGTTTGAGTATCATGAACACCTCAACTCTCATGGTTCGCCATGATGAGCTTGGACTCTGGGGGTTTTGCTGGCCTGTGGTCGGCTCCCCTCAAACGAACCAGCCTCCCAGTGTTTGGTGGCATCACGGGTGTGATAAATATCTACGCTCGCGGTTGTCTGCCAGGTAACCTTTGGTGACAAAGGTTCGCTGGAGCTCACAGATGTCTCTCCTCGGCGAGGACAGCTTTTTTGAACGTTCGATCTCAAATCAGGTAGGACTACCCGCTGAACTTAA	DQ233803	SH195956.06FU	tomentella-thelephora	EcM		Fungi	Basidiomycota	Agaricomycetes	Thelephorales	Thelephoraceae	Tomentella	UDB000970	Tomentella_sublilacina
GL12949	ID1YYUI02HRLSY	TCAGTGAATCATCGAATCTTTGAACGCACCTTGCGCCCTTTGGCTATTCCGAAGGGCATGCCTGTTTGAGTATCGTGAACATCTCAACTCCTTGCGGTTTTCCCGTGATGAGTTTGGACTTTGGGGGTCTTGCTGGCCTGCGGGTTGGCTCCTCTCAAATGAATCAGCTTGCCGGTGTTTGGTGGCGTCACAGGTGTGATAACTATCTACGCTTGTGGTTTTCCGCCAGGTAACCTCCAGCGATGGGGGTTCACTGGAGCTCACAAATGTCTCTCCTCGGTGAGGACAGCTCTTTGAACGTTTGATCTCAAATCAGGTAGGACTACCCGCTGAACTTAA	UDB002622	SH202568.06FU	tomentella-thelephora	EcM		Fungi	Basidiomycota	Agaricomycetes	Thelephorales	Thelephoraceae		FJ946925	uncultured_ectomycorrhizal_fungus
GL11503	ID03IXK02INZ7G	CTAGACTCGTCATCGATGAAGAACGTGGCGAAATGCGATAAGTAATGTGAATTGCAGAATTCAGTGAATCATCGAATCTTTGAACGCACCTTGCGCTCCTTGGTATTCCGAGGAGCATGCCTGTTTGAGTGTCTTGAAATCATCAACCGCCCCCGTTTGAAATGCGGGTTGGAGGTTGGAGCTGGGGGTTTGCTGCCTTTGCGGGGCGGCTCCCCTCAAATGCATCGGTTGGACCGTGGGTTGAACTCAATGTGCGTTGTAAATCCCTCGCTCTCACGAGAAGTTCCCCTTTCGGTGGTCCCTCCCCATGACCTTGCCTTTGGAGTGGCGGTCAACTTGCTCTGAAATCTGACCTCAAATCAGGTAGGACTACCCGCTGAACTTAA	JX392841	SH205729.06FU		Saprotroph	White rot	Fungi	Basidiomycota	Agaricomycetes	Trechisporales	Hydnodontaceae	Trechispora	AF347086	Trechispora_kavinioides
GL18285	ID1YYUI02IYELQ	CTAGACTCGTCATCGATGAAGAACGCTGCGAAATGCGATAAGTAATGTGAATTGCAGAATTCAGTGAATCATCGAATCTTTGAACGCACCTTGCGCTCCTTGGTATTCCGAGGAGCATGCCTGTTTGAGTGTCTTGAAGTCATCAACCCACGCCGTTTGAAACGGTATGCGTGTTGGAGCTGGGGGCCTTGCTGCCGAGAGGTGGCTCCCCTCAAATGCATCGGTTGGGCCTGTGGGTCGAACTCGATTGGGTGTTGTATTATCCTCGCTCTAACGAGATGTTCCCCTCCTTTGTGCCCCTCCACGACCTGCCTTCATGAGCGGCAGGTCAAGCAAAACTTTGAAATTCTGACCTCAAATCAGGTAGGACTACCCGCTGAACTTAA	JX392841	SH205729.06FU		Saprotroph	White rot	Fungi	Basidiomycota	Agaricomycetes	Trechisporales	Hydnodontaceae	Trechispora	GU054128	uncultured_fungus
GL18797	IJOVCJS01CG559	CTAGACTCGTCACCGATGAAGAACGCAGCGAAATGCGATAAGTAATGTGAATTGCAGAATTCAGTGAATCATCGAATCTTTGAACGCACCTTGCGCTCCTTGGTATTCCGAGGAGCATGCCTGTTTGAGTGTCTTGAAGTCATCAACCCCAAACGTTTTGTGCGTTCTGGCGGTTGGAGCTGGGGGCTGCTGCCGCAAGGCTGCTCCCCTCAAATGCATCGGTTGGACCTGTGGGTCGAACTCGACTGGGCGTTGTACCATCCTCGCTCTTACCCGAGACGTTCCCCTTTGTTGTGTCCTTCCACAGACCCCTGCCAGTTGGAGTTGGCGGTCGACACTTTGAAATTCTGACCTCAAATCAGGTAGGACTACCCGCTGAACTTAA	JX392841	SH205729.06FU		Saprotroph	White rot	Fungi	Basidiomycota	Agaricomycetes	Trechisporales	Hydnodontaceae	Trechispora	EU003034	uncultured_Basidiomycota
GL18832	IGJRWKL02F442V	CTAGACTCGTCACCGATGAAGAACGCAGCGAAATGCGATAAGTAATGTGAATTGCAGAATTCAGTGAATCATCGAATCTTTGAACGCACCTTGCGCTCCTTGGTATTCCGAGGAGCATGCCTGTTTGAGTGTCTTGAAGTCATCAACCCCTCCCGTTTTGTGCGAGAGGAAGGTTGGAGATGGGGGCCTGCGACCGTGAGGCCGCTCCCCTCAAATGCTTCGGTTGGGCCTGTGGGTCGAACTCGGTTGGGCGTTGTACCATCCTCGCTCTTTGTCCGAGAAGTTCCCCTTTGATTGAGCCCTCCCATGACTGCCTTTCCAAGAGGTGGTCAATTTAATTTGAAATCTGACCTCAAATCAGGTAGGACTACCCGCTGAACTTAA	JF300722	SH204186.06FU		Saprotroph	White rot	Fungi	Basidiomycota	Agaricomycetes	Trechisporales	Hydnodontaceae	Trechispora	JF300756	uncultured_fungus
GL19436	ID1YYUI01D7LYD	CTAGACTCGTCACCGATGAAGAACGCAGCGAAATGCGATAAGTAATGTGAATTGCAGAATTCAGTGAATCATCGAATCTTTGAACGCACCTTGCGCTCCTTGGTATTCCGAGGAGCATGCCTGTTTGAGTGTCTTGAAGTCATCAACCCAAGCCGTTTTACTGCGGCCGACGGTTGGACGTGGGGCGTGCTGCCGCGAGGCTGCTCCCCTCAAATGCGTCGGTTGGGCCTGTGGGTCGAAACTCGAAAGGGCGTTGTACCATCCTCGCTCCCTCGAGATGCCTCCCCTCCCGTGCCCCTCCACGACCTGCCTCTGAAGGGTGGCGGTCAAAACCTTTTTGAAATCTGACCTCAAATCAGGTAGGACTACCCGCTGAACTTAA	JX392841	SH205729.06FU		Saprotroph	White rot	Fungi	Basidiomycota	Agaricomycetes	Trechisporales	Hydnodontaceae	Trechispora	JF691276	uncultured_Trechisporales
GL20202	IJOVCJS01DB47N	GTCATCAACCCCTACCGTTTTGTGCGGTCTGGGTGTTGGATCTGGGGGCTTGCTGCCGAGAGGCGGCTCCCCTCAAATGCATCGGTTGGGCCTGCGGGTCGTACTCGGTTGGGCGTTGTATTATCCTCGCTTTAACGAGATGTTCCCCTCCTTGCGCCCCTCCACGACCTGCCTATTGAGTGGCGGTCAAGCAAAAACTTTGAAATTCTGACCTCAAATCAGGTAGGACTACCCGCTGAACTTAA	JX392841	SH205729.06FU		Saprotroph	White rot	Fungi	Basidiomycota	Agaricomycetes	Trechisporales	Hydnodontaceae	Trechispora	FJ820507	uncultured_fungus
GL21301	ID1YYUI01C38WF	CTAGACTCGTCATCGATGAAGAACGTGGCGAAATGCGATAAGTAATGTGAATTGCAGAATTCAGTGAATCATCGAATCTTTGAACGCACCTTGCGCTCCTTGGTATTCCGAGGAGCATGCCTGTTTGAGTGTCTTGAAGTCATCAACCCAAGCCGTTTGTCGCGGTGTACGGTTGGATGTGGGGCGTGCTGCCGCGAGGCTGCTCCCCTCAAATGTGTCGGTCGGACCTGTGGGTCGAACTCGAAAGGGCGTTGTATTATCATCGCTCTCCTGAGATGTTCCCCTTTAGGTGTCCCACCTAGACCTGCCTATGGAGTGGCGGTCAAACTAAACTTTGAAATCTGACCTCAAATCAGGTAGGACTACCCGCTGAACTTAA	JX392841	SH205729.06FU		Saprotroph	White rot	Fungi	Basidiomycota	Agaricomycetes	Trechisporales	Hydnodontaceae	Trechispora	JF691276	uncultured_Trechisporales
GL23162	IGJRWKL02HQ8WU	CGCACGTTTCTTGCGAGCGAGCGGCGGTTGGATCTGGGGGCTCTGCCGCTCTCCGAGCCGGCTCCCCTCAAATGCTTCGGTTGGGCCTGCGGGTCGAACTCGACTGGGCGTTGTACCATCCTCGCTCGAACGAGACGGACCCCTACCGTGCCGAACCTCGACCTGCCTCGCAGTGGGCGGTCAAATCAAGCCTTTGAAATCTGACCTCAAATCAGGTAGGACTACCCGCTGAACTTAA	JX392826	SH235530.06FU		Saprotroph	White rot	Fungi	Basidiomycota	Agaricomycetes	Trechisporales	Hydnodontaceae	Trechispora	GU053993	uncultured_fungus
GL24497	IGJRWKL02G9MAE	TCCCGTTTCGTGCGTGGAGAAGGTTGGAGGTGGGGGCTTGCGGTCGTGAGGCCGCTCTCCTCAAATGCTTCGGTCGGGCCTGTGGGTCGGACTCGGTTGGGCGTTGTACCATCCTCGCTCTCCTCCGAGAACTTCCCCGTCGATAGAGCCCTTCCCCGGCCTCCTATGGAGCGGTGGCCAAAATAAACACTTGAAATCTGACCTCAAATCAGGTAGGACTACCCGCTGAACTTAA	HM030587	SH204187.06FU		Saprotroph	White rot	Fungi	Basidiomycota	Agaricomycetes	Trechisporales	Hydnodontaceae	Trechispora	AF347090	Trechispora_hymenocystis
GL25384	IJOVCJS01CSP2U	CCTCCCGTTTCGTGCGGGGCGGGTTGGATGTGGGGGCTCTGCTGCCGTGAGGCGGCTCCCCTCAAATGCATCGGTTGGGCCTGTGGGTCGAACTCGACTGGGCGTTGTACCATCCTCGCTCGACAGAGATGTTCCCCTCCTGTGTCCTTCCCCGACCTGCCTATCAGAGTGGCGGTCAAGCAACAAACTTTGAAATCTGACCTCAAATCAGGTAGGACTACCCGCTGAACTTAA	EU490099	SH228892.06FU		Saprotroph	White rot	Fungi	Basidiomycota	Agaricomycetes	Trechisporales	Hydnodontaceae	Trechispora	GU328562	uncultured_Basidiomycota
GL18047	IGJRWKL02IBV5J	CTAGACTCGTCAACGATGAAGAACGCAGCGAAATGCGATAAGTAATGTGAATTGCAGAATTCAGTGAATCATCGAATCTTTGAACGCACCTTGCGCCCCTTGGTATTCCGAGGGGCATGCCTGTTTGAGTGTCTTGAAATCATCAAACCTAACCGGTCTTGTTGCCGGCGCGGTTTGGACTTGGGGGTTCTTTGCTGCCGCTCGCGGTGGCTCCCCTTAAATGTATCGGTCGGGCTTTCGTGCGGCTCTGTCCCTTGGCGTTGTATTACCCTCGTCGCTGGATGGCTCGCGATTCTGTGCCCCTCCCTGACCTGCCTCTGGAGCGGCGGTCTCTAACATTTTGTGATCTGACCTCAAATCAGGTAGGACTACCCGCTGAACTTAA	GU256966	SH216221.06FU		Saprotroph	White rot	Fungi	Basidiomycota	Agaricomycetes	Trechisporales			FM999575	uncultured_ectomycorrhizal_fungus
GL19354	IGJRWKL02HMY0W	CTAGACTCGTCACCGATGAAGAACGCAGCGAAATGCGATAAGTAATGTGAATTGCAGAATTCAGTGAATCATCGAATCTTTGAACGCACCTTGCGCCCCTTGGTATTCCGAGGGGCACGCCTGTTTGAGTGTCTTGAAACCATCAACCGAAGCGGCCTTGTGCCGTCCGAGGTTGGAACTGGAGGCTTTGCTGCTGTTGGCGGCTCCTCTCAAATGCGTCTGCCGTGCCTCCGGGGCCGTGCTCGCAATGGGCGTTGTATTTCCCTCGCTCCGAGTGCCCCTGGACATACTGTGTGTGCGGCACCGACCTGCCTCTCGAGCGGCGGTCTGTCATCAAACCGAATTCTGACCTCAAATCAGGCGGGACTACCCGCTGAACTTAA	JX392841	SH205729.06FU		Saprotroph	White rot	Fungi	Basidiomycota	Agaricomycetes	Trechisporales			FJ820613	uncultured_fungus
GL20413	ID1YYUI01BOELX	CTAGACTCGTCATCGATGAAGAACGCTGCGAAATGCGATAAGTAATGTGAATTGCAGAATTCAGTGAATCATCGAATCTTTGAACGCACCTTGCGCTCCTTGGTATTCCGAGGAGCATGCCTGTTTGAGTGTCTTGAAATCATCAAACCCCTCCGGTTTCTGCTGGAGCGGGCTTGGACTTGGGGGTTTTTGCTGCCTTCTGGCGGCTCCCCTTAAATGAATCGGTCGGGCTTTCGTGTGGCTTGTCCCTTGGCGTTGTATCAACCTCGTCGCTGGATGGCTCGCGAGCTTAGCGCCCCTCCAAGACCAGCCTCTGGAGCGGCGGTCAACTTCAATTTGTGATCTGACCTCAAATCAGGTAGGACTACCCGCTGAACTTAA	JF519133	SH216217.06FU		Saprotroph	White rot	Fungi	Basidiomycota	Agaricomycetes	Trechisporales			JF519283	uncultured_Trechisporales
GL22544	IJOVCJS01ECUPV	CTAGACTCGGTCATCGATGAAGAACGCTGCGAAATGCGATAAGTAATGTGAATTGCAGAATTCAGTGAATCATCGAATCTTTGAACGCACCTTGCGCTCCTTGGTATTCCGAGGAGCATGCCTGTTTGAGTGTCTTGAAATCATCAACCCCTTCGGTTTTGCGACTGATGCGGGTTGGACTTGGGGGTTTGCTGCTGAAAGGCGGCTCCCCTTAAATGTTTCGGTTGGGCCTGTAGGTCGACTTTGATTGGGCGTTGTATTATCCTCGCTCCTGAAAGTCTCCTCTTTTGTGCCCTTCCACGACCTGCCTATGGAGTGGCGGTCAAACTCTCCTGACATCTGACCTCAAATCAGGTAGGACTACCCGCTGAACTTAA	AY969692	SH217287.06FU		Saprotroph	White rot	Fungi	Basidiomycota	Agaricomycetes	Trechisporales			AM902006	uncultured_Basidiomycota
GL26064	ID03IXK02G3SP2	CCCCGGTTTTGCGATCGCGGGGCTTGGACTTGGGGGCTCTGCTGCCGCGAGGTGGCTCCCCTTAAATGCATCGGTCGGGCCTACTGGGGCTCCGTCACCTGGGCGTTGTATTACCCTCGCTCTGCCGACGTGCCACAGCTTTGTGTGCCCGACCCCGACCTGCCTCTGGAGCGGCGGTCAACACTCTTTGAGATCTGACCTCAAATCAGGTAGGACTACCCGCTGAACTTAA	GU256965	SH226992.06FU		Saprotroph	White rot	Fungi	Basidiomycota	Agaricomycetes	Trechisporales			GU256965	uncultured_fungus
GL01787	ID1YYUI01CCPW4	CTAGACTCGTCATCGATGAAGAACGTGGCGAAATGCGATAAGTAATGTGAATTGCAGAATTCAGTGAATCATCGAATCTTTGAACGCACCTTGCGCTCCTTGGCATTCCGAGGAGCATGCCTGTTTGAGTCTCATGAATCTCTCAAGCCAGCCGGGTCTTACCGCCTGACTGGATTGGACTTGGAGGCTGCCGGTCTGACCGGCTCCTCTTAAATGCATTAGCTGGAACCTGAACGCTATCTACGGTGTGATAATTATCTGCGCCGCATGAATGGCGCCTCGGTGTTACCCCGTTCACTCGGTCGTGTAGCCTGGGGGCATGGAACCGCTTCTAATCGTCCGCGGACGTCGCGACACCTCCACCGGGAGGCCGGCGTGGACAATTCATCTGACATCTGA…	HM030585	SH220280.06FU				Fungi	Basidiomycota	Agaricomycetes				HQ211788	uncultured_Agaricomycetes
GL03889	ID03IXK02GICNW	TTGGTATTCCGAAGGGTATGCCTGTTTGAGTGTCATTAATATTCTCAACCATTGGCTTGGGTTTTTTTCCCTTGACAATCGTGTTGGATTTGAGGGTGTTGTGTCGGTCCACTTCAATAATTTTTTGAAGACGGTCGACTCCCTTTAAAAGCATTAGTGGGTTTGACCTTTGTGGATATGCCTCGATTTGATAATTATCAAGATGTCGTCGCACTGAAACAATAAGCCTGCTGTCTAACTGTCCCTGACAAGGACTGCTCTGCTTTTGAGCAATAAGAGTCGCTGCTTTCGGGCTTGACTTGTAACAATTTATTTGACCTCAAATCAGGTAGGACTACCCGCTGAACTTAA	HQ211575	SH226930.06FU				Fungi	Basidiomycota	Agaricomycetes				GQ267496	uncultured_fungus
GL24916	ID1YYUI02HVY8J	CTAGACTCGTCATCGATGAAGAACGCTGCGAAATGCGATACGTAATGTGAATTGCAGAATTCAGTGAATCATCGAATCTTTGAACGCAACTTGCGCTCCTTGGTATTCCATGGAGCATGCCTGTTTGAGTGTCACGTAAACCCTCACCCTTGCGATGTTACAATCGTCTTGTGGTGGATTTGGATTGTGCCGTAATTGGCTCATCCTGAAATGCATTAGCTTGCGCTTTTTACAGTGCTCGGCATGGTGTGATAATTATCTGCGCCGTCGCCTTAGGCCTGTTCTATATGTGCAGCTTCTAATCGTCCCTTGTGGACAACTTTACTTAACGCTTTGGCCTCAAATCAGGTAGGACTACCCGCTGAACTTAA	DQ421268	SH223297.06FU				Fungi	Basidiomycota	Agaricomycetes				FM866360	uncultured_soil_fungus
GL28757	IJOVCJS01EOTMT	CTAGACTCGTCATCGATGAAGAACGCTGCGAAATGCGATAAGTAATGTGAATTGCAGAATTCAGTGAATCATCGAATCTTTGAACGCACCTTGCGCTCCTTGGCATTCCGAGGAGCATGCCTGTTTGAGTGTCATGTCAATACTCAAATCCATGCCTTTGTGTTATGGGTTTGGACTTGAAGGGTTTGCTGGCTTTTCGGAGCTGGCTCCTTTTAAATGCATTAGCTGGTTTTATGAGCCTGTTTTTCAGTGTTGTAATTTTTTAATACGCGCTGTGATGAACTAGTTCAACTTGCCGCTGATAGACAACATCTTTCTATGTCTCTGACCTCAAATCAGGTAGGATTACCCGCTGAACTTAA	FJ475792	SH213184.06FU				Fungi	Basidiomycota	Agaricomycetes				FJ475792	uncultured_Trechisporales
GL19347	IGJRWKL02IA9X9	CTAGACTCGTCATCGATGAAGAACGTGGCGAAATGTGATAAGTAATGTGAATTGCAGAATTCAGTGAATCATCGAATCTTTGAACGCACCTTGCGCTCTCTGGTATTCCGGAGAGCATGCCTGTTTGAGTGTCATGAACTCTTCAACCCACCGGTTCCTTGTTGAACCGAGTTGGTGTTTGGATTTTGAGCTTTGCTATTTATTTAGCTAGCTCGTAATATATTAGCATCTTTCAATTTCATAATCGGATTGACTCAGCGTAATAGACTATTCGCTGAGGACACTTTTATTAGTGGCCGGTAATGGAGATAGAGAAGCTTCCAACTCTTCTAGTCAACTTTAGATTAGACCTCAAATCAGGCAGGATTACCCGCTGAACTTAA	HQ267075	SH219414.06FU		Saprotroph		Fungi	Basidiomycota	Agaricostilbomycetes	Agaricostilbales	Agaricostilbaceae	Bensingtonia	HQ267075	uncultured_fungus
GL03882	ID03IXK02H0EZ3	CGCGATAGTTAATGTGAATTGCAGAATTCAGTGAATCATCGAGTCTTTGAACGCATCTTGCGCTCCTTGGTATTCCGAGGAGCATGCCTGTTTGAGTGTCATGAATCCCTCAGCCCCCAATGCTTTTCGTTAAGTGTTGGCTTGGGTCTGGATTTGGGCGATTGCCAGAGAGCTTTTTCAAGTTCCTGGCTCGCCTCAAAGAGATTAGCTGGACCCCATTCCGAGCTGGTTCAACTCGACGTGATAATTTCATTCGTCGAGGTATGGTTCTTCTCCCTTAAACAAGGAGTGGATCCAGCCAGGTGTAGGAATCCGGTCTGCTTCCAACTTCTGTCTGAAGTCCAATTTATTGGGCATGCAGCAGACTTTTTAATGCTCTGGCCTCAAATCAGGTAGGAT…	JF828314	SH199848.06FU		Plant pathogen		Fungi	Basidiomycota	Exobasidiomycetes	Entylomatales	Entylomataceae	Tilletiopsis	JF828314	Tilletiopsis_sp_OVB10_013
GL27679	IJOVCJS01CWWPU	CTAGACTCGTCACCGATGAAGAACGCAGCGAAATGCGATAAGTAATGTGAATTGCAGAATTCAGTGAATCATCGAATCTTTGAACGCACCTTGCGCTCCTTGGTATTCCTTGGAGCATGCCTGTTTGAGTGTCTTGAATATCTCTGCTCCTCAATTTTTTAACGAAAGTTGGTTTGGAGTCAGGTCCTTGGGCTTGCCTGCGGTTTGTTACGAACACACGCTTGCCTTAAATGCATTAGCTGGATTTCAGTAGAGTTGTTAAGTAACATTGAAAACTTTCGTAATATGAAGTCTGCTTTCTAACGGAATTTTATTCATTATATCTTTGGCCTCAAATCAGGTAGGACTACCCGCTGAACTTAA	AB180323	SH204828.06FU		Plant pathogen		Fungi	Basidiomycota	Exobasidiomycetes	Exobasidiales	Exobasidiaceae	Exobasidium	HQ211632	uncultured_Exobasidium
GL08511	ID1YYUI01B0545	CGTCATCGATGAAGAACGTAGCGAAATGCGATAAGTAATGTGAATTGCAGAATTCAGTGAATCATCGAATCTTTGAACGCACCTTGCGCCCTTGGGTATTCTCAAGGGCATGCCTGTTTGAGTGTCATAACATGTTCAGCTCTTAGCCTTTTTGAAAGAAGAAAGTTGCTTGGAGTTGGTGATGGACGTTTTTGCCAGACCTTACCGTCTTGCTCGTCTTAAATCGATCAGTGGAATCATCTTTTGAGTCCGGTCTGACTATGTGTGATAATTTGATCACATAGAATGTGGGCTTGCCCTACAACCGCATCTTGAAGGACTCTGCTTCCAACACGGAATGGTCTTCGACCATCGTTAGCCTTTTTAATGCTTGACCTCAAATCAGGTAGGACTACCCGC…	EU257576	SH192499.06FU		Plant pathogen		Fungi	Basidiomycota	Exobasidiomycetes	Tilletiales	Tilletiaceae	Tilletia	AF398461	Tilletia_bromi
GL00433	ID03IXK02ID5QD	TCTAGACTCGTCATCGATGAAGAACGTGGCGAAATGCGATAAGTAATGTGAATTGCAGAATTCAGTGAATCATCGAATCTTTGAACGCACATTGCGCTCCTCGGCATTCCGTGGAGCATGCCTGTTTGATGCGCATGAATAACATCGGCCACTTGCGTGGCTTGGTTCTGAGCTTTCTCACTCTGTGTGAGTAGTTCAAAGTCTCAAACTTTTGAGAGGTCGCGATTGCTGGCAACGGCCCTTTGGCTTAGTCCACCGGCGTCAAATGTTACACCTCCCAAGTGAACTGATAGTATAACACACCATCAGATAACTCGGGAGCATTTGATGATCAACCGAGGGACGGACATTTGGGTACGGACCTGCTCTCTGTAGATCTTTATTGTGTGGGATTTTTCC…	EU558664	SH212134.06FU				Fungi	Basidiomycota	Group21				AM999653	uncultured_fungus
GL03362	IGJRWKL02GTWGN	GAAAAAACTGACCGGCTTGTCCGGACCGTTTATGAGCTCTCTCACAATGTGAGTAGTTCAAAGTCACAGATTTCAAGAGGTCGCTGCTTTTAGAGGACGGCTCAATGACTTTGCCAGCCGGCGTCAAAAGATATACCTCCCATGTGAACTGATAGTATAGTACGCTTTTCAGATAACGTGGGAGCTTTTGACCAACCGACGGACAGAGGTGTTGAACACGAATCTGGGCTAAGCGCATCTTTATTGTGTGGATCATCCCTATGGGCGGGTTCCTCAGAAATTATGCATCAAATCAGGTAGGGTTACCCGCTGAACTTAA		no best match accno				Fungi	Basidiomycota	Group21				AM999644	uncultured_fungus
GL03481	ID03IXK02ISPVG	ACTCGTCAACGATGAAGAACGCAGCGAAATGCGATAAGTAGTGTGAATTGCAGAATTCAGTGAATCATCGAATCTTTGAACGCACATTGCGCTCCTCGGCATTCCGTGGAGCATGCCTGTTTGATGCGCATGAACAAAATCGGCCACAGGTTGGCTAGGTTATGAGCTTTCTCACTGTGTGAGTAGTTCAAAGTCACAAAACTTTGAGAGGTCGCGACTGCTGGCAACGGCCCAATGGCTTAGTCCACCGGCGTCAAATGAACCCAAGTCGACTGATAGTATATCTATTTCAGAAACCTTGGGACCAGCATTTGATGATCAACCGAGGGACGGACATCTGGGAACCGGACCTGCTCTCTGTGGATCTTTGTTGTGTGGGATCTTTCCCCTCAGAAATTC…	JN544478	SH238096.06FU				Fungi	Basidiomycota	Group21				AM999647	uncultured_fungus
GL03884	ID03IXK02G6WO2	GGCATTCCGTGGAGCATGCCTGTTTGATGCGCCCGAGAAAAATGGGCCGGGGGACTTGTTCCCCGGACCGCTTTTGAGCTTTCTCACCTTGTGAGTAGTTCAAAGTCACAGAATTTTGAGAGGTCGCTTGCGCAGTTTACGGTCCAAAGACACTGTCAGCCGACGTCGAAGGATACACTCCACATGCGAAACGATAATAATTTCTTTGTCGGATTAACATGTGGGCTTTCGGCGAACCGCAGGACGGAGTCGGCGAGCACGATTCATCGCGGGGCGCATCTTTATTGAGCGGATCACTCCCCTCAGAAATTTTGCATCAAATCAGGTAGGGTTACCCGCTGAACTTAA	JX042766	SH219325.06FU				Fungi	Basidiomycota	Group21				AY969544	uncultured_Basidiomycota
GL17277	ID1YYUI01B0KNG	CTAGACTCGTCAACGATGAAGAACGCAGCGAAATGTGATAAGTAATGTGAATTGCAGAATTCAGTGAATCATCGAATCTTTGAACGCACCTTGCGCTCCCTGGTATTCCGGGGAGCATGTCTGTTTGAGTGTCATGAACTCTTCAACCCACCAGTTTCTTGTAGACTGATTGGTGTTTGGATTTTGAGCGTTGCTGGTCTTCGGATCTAGCTCGTTCGTAATAAATTAGCATCTCTAATTCGAACTCGGATTGACTCAGTGTAATAGACTATTCGCTGAGGACACGCTCTTGTAGTGTGGCCGAATGAGATCTCAGTAGAGGCTTCCAACTACTTTAGTCAACTTTAGATTAGACCTCAGATCAGGCAGGATTACCCGCTGAACTTAA	AB038080	SH212310.06FU		Saprotroph	Yeast	Fungi	Basidiomycota	Microbotryomycetes	Leucosporidiales	Leucosporidiaceae	Mastigobasidium	JQ272411	Leucosporidium_sp_1_RB_2011
GL19322	ID1YYUI01CNE76	AGACTCGTCACCGATGAAGAACGCAGCGAAATGCGATACGTAATGTGAATTGCAGAATTCAGTGAATCATCGAATCTTTGAACGCATCTTGCACTCTCTGGTATTCCGGAGAGTATGTCTGTTGGAGTGTCATGAATTCTTCAACCCCATCGTTTCTTGTAAACGTTTGGGTGCTTGGATTCTGAGCGTTGCTGATTATTAGCTCGTTCGTAATGCATTAGCATCCCGATGACAAGTTTGGATTGACTTGGCGTAATAGACTATTCGCTGAGGAGTAAGTGGGTCTCCCACTGAGCCAACTCGTTTCAGGAAGCTTCTAATCCCCAAAGTCTACCTTTTAGATTAGATCTCCAATCAGGCAGGATTACCCGCTGAACTTAA	AB038106	SH218906.06FU		Mycoparasite	Yeast	Fungi	Basidiomycota	Microbotryomycetes	Sporidiobolales	Sporidiobolaceae	Sporidiobolus	NR077090	Sporidiobolus_johnsonii
GL05603	ID03IXK02JGB71	CTAGACTCGTCAACGATGAAGAACGCAGCGAAATGTGATAAGTAATGTGAATTGCAGAATTCAGTGAATCATCGAATCTTTGAACGCACCTTGCGCCTTCTGGCATTCCGGAAAGCATGCCTGTTTGAGTGTCATGAACTCTTCAACCCACCGGTTCCTTGTTGGATCGAGTTGGTGTTTGGATCTTGAATGTTGCTGGCTTAGAACTGTAGTATTCGTACTTCAGGAAAAGGCGAAGCTTGTTCGTAATACATTAGCATCTCAATTTCGAACTTCGGATTGACTCAGCGTGATAGACTATTCGCTGAGGATCATGTTTAGGCATGGCCGAAGATTAAGATAGCTAGAAGCTTCTAATCCCCCACTAGTCAAAACTATAAGATTAGACCTCAGATCAGG…	AB038111	SH203260.06FU		Saprotroph		Fungi	Basidiomycota	Microbotryomycetes	Sporidiobolales		Rhodotorula	NR073324	Rhodotorula_pilati
GL15845	ID03IXK02F9PMG	CTAGACTCGTCATCGATGAAGAACGCTGCGAAATGTGATAAGTAATGTGAATTGCAGAATTCAGTGAATCATCGAATCTTTGAACGCACCTTGCGCTCTCTGGTATTCCGGAGAGCATGTCTGTTTGAGTGTCATGAACTCTTCAACCTACCGATTTCTAGTAAATCGGATTAGTGTTTGGATTTTGAACGCTTGCTGGCCTTTATTGGCGAAGCTCGTTCGTAAATGATTAGCATCTCATATTCGAAAAATCGGATTGACTCAGTGTAATAGACTATTCGCTGAGGACGCTCTTTCGGGAGTGGCCGAGTTTTGTAAAGTAGAAGCTTCTAATTCTATTAGTCAACTTTAGATTAGACCTCAGATCAGGCAGGATTACCCGCTGAACTTAA	AF444537	SH223682.06FU		Saprotroph		Fungi	Basidiomycota	Microbotryomycetes	Sporidiobolales		Rhodotorula	HF558662	Rhodotorula_fujisanensis
GL18357	IJOVCJS01DJCC2	CTAGACTCGTCAACGATGAAGAACGCAGCGAAATGTGATAAGTAATGTGAATTGCAGAATTCAGTGAATCATCGAATCTTTGAACGCACCTTGCGCTCCCTGGTATTCCGGGGAGCATGTCTGTTTGAGTGTCATGAACTCTTCAACCCACCGGTTTCTTGTAGACCGACTGGTGTTTGGATTTTGAATGTTGCTGGTCGAAAGATCCGCTCATTCGTAATATATTAGCATCTCCAAATCGAAATTCGGATTGACTCAGTGTAATAGACTATTCGCTGAGGACACTCGCAAGAGTGGCCGAATCTTGACAATAGCAGAAGCTTCCAACTCTTGTAGTCAATTTTAGATTAGACCTCAGATCAGGCAGGATTACCCGCTGAACTTAA	JQ768940	SH212318.06FU		Saprotroph		Fungi	Basidiomycota	Microbotryomycetes	Sporidiobolales		Rhodotorula	JQ768940	Rhodotorula_sp_TP_Snow_Y129
GL18824	IGJRWKL02JHFCT	CTAGACTCGTCACCGATGAAGAACGCAGCGAAATGTGATAAGTAATGTGAATTGCAGAATTCAGTGAATCATCGAATCTTTGAACGCACCTTGCGCTCTCTGGTATTCCGGAGAGCATGTCTGTTTGAGTGTCATGAACTCTTCAACCCACCAGTTTCTAGTAGACTGTTTGTGGTGTTTGGATCTTGAGCGCTGCTAGTCTGACTAGCTCGTTCGTAATACATTAGCATCTCTAATTCGAATTCGGATTGACTCAGTGTAATAGACTATTCGCTGAGGACACTATTAATTTAGTGGCCGTACTAGAACCAGTAGAAGCTTCAAACTACTTTAGTCAACTTTGATTTAGACCTCAGATCAGGCAGGATTACCCGCTGAACTTAA	AM999553	SH216410.06FU		Saprotroph		Fungi	Basidiomycota	Microbotryomycetes	Sporidiobolales		Rhodotorula	EU872492	Rhodotorula_sp_CBS_10977
GL19160	ID1YYUI02GYGDK	CTAGACTCGTCAACGATGAAGAACGCAGCGAAATGCGATACGTAATGTGAATTGCAGAATTCAGTGAATCATCGAATCTTTGAACGCACCTTGCGCTCCTTGGTATTCCGAGGAGCATGCCTGTTTGAGTGTCATGAAATCTTCAACCCACCTCTTTCTTAGTGAATCTGGTGGTGCTTGGTTTCTGAGCGCTGCTCTGCTTCGGCTTAGCTCGTTCGTAATGCATTAGCATCCGCAACCGAACTTCGGATTGACTTGGCGTAATAGACTATTCGCTGAGGATTCTAGTTTACTAGAGCCGAGTTGGGTTAAAGGAAGCTCCTAATCCTAAAGTCTATTTTTTGATTAGATCTCAAATCAGGTAGGACTACCCGCTGAACTTAA	AF444539	SH228919.06FU		Saprotroph		Fungi	Basidiomycota	Microbotryomycetes	Sporidiobolales		Rhodotorula	NR073294	Rhodotorula_glutinis
GL19429	ID1YYUI01CCBX7	CTAGACTCGTCATCGATGAAGAACGCAGCGAAATGTGATAAGTAATGTGAATTGCAGAATTCAGTGAATCATCGAATCTTTGAACGCATCTTGCACTCTCTGGTATTCCGGAGAGTATGTCTGTTTGAGTGTCATGAATTCTTCAACCCTCCCTTTTCTTAGTGAATTGAGAGGAGTTTGGATTCTGAGTGTTGCTCCTAACCCGAGCTCATTCGTAATATATTAGCATCCATATTCGACTTCGGATTGACTTGGCGTAATAGACTATTCGCTGAGGAATCTAACTTCGGTTAGAGCCGTTTTTGAACTAGGAAGCTGCTAATCTAGCTTAGTCTACCTTTAGATTAGATCTCAAATCAGATAGGATTACCCGCTGAACTTAA	JN636813	SH212601.06FU		Saprotroph		Fungi	Basidiomycota	Microbotryomycetes	Sporidiobolales		Rhodotorula	JN636813	Sporidiobolales_sp_G5
GL19841	IGJRWKL02G4QU1	CTAGACTCGTCATCGATGAAGAACGCAGCGAAATGTGATAAGTAATGTGAATTGCAGAATTCAGTGAATCATCGAATCTTTGAACGCACCTTGCGCTCCCTGGTATTCCGGGGAGCATGCCTGTTTGAGTGCCATGAACTCTTCAACCCACCAGTTTCTAGTAGACTGCGTTGGTGTTTGGATTTTGAGCGTTGCTAGTCTGACTAGCTCGTTCGTAATACATTAGCATCTCTAATTCGAATTCGGATTGACTCAGTGTAATAGACTATTCGCTGAGGACACCTTTATTGGTGGCCGTACTAGAACCAGTAGAAGCTTCCAACCCGAGATAGTCACCTATTTTTTAGACCTCAGATCAGGCAGGATTACCCGCTGAACTTAA	DQ068975	SH216408.06FU		Saprotroph		Fungi	Basidiomycota	Microbotryomycetes	Sporidiobolales		Rhodotorula	FJ237179	uncultured_fungus
GL19872	IGJRWKL02H0WNH	CGCTCCCTGGTATTCCGGGGAGCATGCCTGTTTGAGTGTCATGAACTCTTCAACCCACCAGTTTCTAGTGAACTGTGTTGGTGTTTGGATCTTGAGCGTTGCTAGTCTGACTAGCTCGTTCGTAATATATTAGCATCTCTAATTCGAATTCGGATTGACTCAGTGTAATAGACTATTCGCTGAGGACACTTTTATTAGTGGCCGTACTAGAACCAGTAGAAGCTTCCAACTATTGTAGTCAACTTTTAGATTAGACCTCAGATCAGGCAGGATTACCCGCTGAACTTAA	DQ068975	SH216408.06FU		Saprotroph		Fungi	Basidiomycota	Microbotryomycetes	Sporidiobolales		Rhodotorula	GU931762	uncultured_Rhodotorula
GL10243	IGJRWKL02G4OTB	CTAGACTCGTCATCGATGAAGAACGCAGCGAAATGCGATACGTAATGTGAATTGCAGAATTCAGTGAATCATCGAATCTTTGAACGCACCTTGCGCCCTTTGGTATTCCGAAGGGCATGCCTGTTTGAGTGTCGTGAAACTCTCAACCCCCTCGTTTTGTAATGAAACGAGCGTGGGCTTGGACTGTGGTCGTTTGCCGGTCTTTGATTGATCAGCTCGACTGAAATACATGAGCGTACCTGTAATTGGTAGCAGTAGCTTATCCTGGCGTGATAGTATTATTCGTCTAGATTTTTACATGCATTACTCCAATCGCAGCGGCGCTATATAATGCCGTGCGGCTTCTATTAGCCAATCGATTTTACCTCATAGACCTCAGATCAGGCAGGGCTACCCGCT…	EU075189	SH225553.06FU				Fungi	Basidiomycota	Microbotryomycetes	Sporidiobolales			AY313068	Sporobolomyces_sp_TY_212
GL20688	IJOVCJS01C7KVS	CAGTGAATCATCGAATCTTTGAACGCACCTTGCACTCTTTGGTATTCCGAAGAGTATGTCTGTTTGAGTGTCGTGAAACTCTCAACCCCCCCTTTTTGTAACGAGATGGGCGTGGGCTTGGATTATGGCTGTCTGTCGGTTCTAATCGAATCGGCTCGGCTGAAATACATGAGCGGACCACACTGAATACAGTGACGGCTTGACTCGGCGTAATAATCTTTTCGCTGAGGACGTTCATTTTTTCAGATAGGCGCTTCTAATGCTACAAATCTTTTTAAGCTTTAGACCTCAAATCAGTCAGGACTACCCGCTGAACTTAA	EU871501	SH227538.06FU				Fungi	Basidiomycota	Microbotryomycetes	Sporidiobolales			AB476528	uncultured_fungus
GL27193	ID03IXK02I2FTQ	CTAGACTCGTCATCGATGAAGAACGCTGCGAAACGCGAAATTTATTGTGAATTGCAGAATTATGAACCATCGAATCTTTGAACGCACCTTGCGCTCTTGGGTTATTCCTGAGAGCATGCTTGTTTGAGTGTCTAGTACCCCTCTCCACCCCGTCGGTTTTCGGATCGATAGACAGGGCTGGGATCGTGATGCGTGCCTGTTGTTAGGCTGCATTGAAATCTAAGAAGCTGAATCGGCTTCACGCGGCTTGACCCGTTGTTATAAACTAAAACATCAATGGGAACGCGTGAGCGCGAACGGGCTTACCACAAATTCTAGTGCATTTTGACCTCAAATCAAGTAGGACTACCCGCTGAACTTAA	AB038060	SH224623.06FU				Fungi	Basidiomycota	Microbotryomycetes	Sporidiobolales			NR073299	Sporobolomyces_lactophilus
GL10275	ID1YYUI01BH4OB	CTAGACTCGTCATCGATGAAGAACGCTGCGAAATGTGATAAGTAATGTGAATTGCAGAATTCAGTGAATCATCGAATCTTTGAACGCACCTTGCGCTCCTTGGTATTCCGAGGAGCATGTCTGTTTGAGTGTCATGAACTCCTCAACCCTCCATTTCCTTGTTTGAAATGTTTTGAGGTGATTGGATTTTGAGTACTTGCTCTTTTATCAAAATTAGCTTACTCGTAATACATTAGCACAATTCAACTTCGAACTCGGATTGACTCGGCGTAATAGACTATTCGCTGAGGACATTGAGAATTAGTTTTCTCTAATGGCCGACTTTAGACGATTTGAATAGCTTCAAATATTATAAACCTTTTTTAAGATTAGACCTCAAATCAGGCAGGATTACCCGCT…	AB520437	SH212316.06FU				Fungi	Basidiomycota	Microbotryomycetes				HM036653	fungal_sp_KRP96
GL09647	ID1YYUI01B3112	TAGACTCGTCAACGATGAAGAACGCAGCGAAATGTGATAAGTAATGTGAATTGCAGAATTCAGTGAATCATCAAATCTTTGAACGCACCTTGCGCTCCTTGGTATTCCGAGGAGCATGTCTGTTTGAGTGTCATGAACTCTTCAACCCTCCATTTCCTTGTTTGAAATGTTTTGAGGTGATTGGATTTTGAGTACTTGCTCTTTTATCAAAATTAGCTTACTCGTAATACATTAGCACAATTCAACTTCGAACTCGGATTGACTCGGCGTAATAGACTATTCGCTGAGGACATTGAGAATTAGTTTTCTCTAATGGCCGACTTTAGACGATTTGAATAGCTTCAAATATTATAAACCTTTTTTAAGATTAGACCTCAAATCAGGCAGGATTACCCGCTG…	AB520437	SH212316.06FU				Fungi	Basidiomycota	Microbotryomycetes				HM036653	fungal_sp_KRP96
GL17319	IJOVCJS01CK9B1	CTAAAACTCGTCACCGATGAAGAACGCAGCGAAATGTGATAAGTAATGTGAATTGCAGAATTCAGTGAATCATCGAATCTTTGAACGCACCTTGCGCTCTCTGGTATTCCGGAGAGCATGCCTGTTTGAGTGTCATGAACTCTTCAACCCACCGGTTCCTTGTTGGACCGAGCTGGTGTTTGGATTCTGATCGCTGCAAGCTCTGTCTTGCTCGGTCGTAATACATTAGCCCTCTCAATTTCGAACTTCGGATTGACTCAGCGTAATAGACTATTCGCTGAGGACACCCTCGGGTGGCCGACCAGTAGATGACAGTAGAGGCTTCCAATCCATCTAGTCAAATCTTTAGATTAGACCTCAGATCAGGCAGGATTACCCGCTGAACTTAA	HQ611330	SH219415.06FU				Fungi	Basidiomycota	Microbotryomycetes				DQ914741	Microbotryomycetidae_sp_EXP0507F
GL18521	ID1YYUI01C4HPY	CTAGACTCGTCATCGATGAAGAACGCAGCGAAATGTGATAAGTAATGTGAATTGCAGAATTCAGTGAATCATCGAATCTTTGAACGCACCTTGCGCTCCCTAGTATTCTGGGGAGCATGTCTGTTTGAGTGTCATGAACTCTTCAACCCTCCAGTTTCTTGTAGACTGATTGGTGTTTGGATTTTGAATGCTGCTGGTCTTCGGACGTAGCTCATTCGTAATATATTAGCATCTCTAATTCGAATTCGGATTGACTCAGTGTAATAGACTATTCGCTGAGGACACTTTTATTAGTGGCCGAATAAGATAATTGTAGAAGCTTCGAACCTCTATAGTCAACTTTAGATTAGACCTCAGATCAGGCAGGATTACCCGCTGAACTTAA	JX981877	SH212313.06FU				Fungi	Basidiomycota	Microbotryomycetes				HQ211717	uncultured_Microbotryomycetes
GL21372	ID03IXK02IWIIY	GAAGAACGCAGCGAAATGCGATAAGTAATGTGAATTGCAGAATTCAGTGAATCATCGAATCTTTGAACGCACCTTGCGCCCTTTGGTATTCCGAAGGGCACACCTGTTTGAGTGTCATTAATTCCTCAATCCTATCGTTTTTTTAACAAAGCGGTAATGGTTGGATGTTGAGTGTTGCTGGATCCTTTGGTTCAGCTCGCTTTAAATTTATGAGCAGGCTCCTATTCTATTCGGACTGACTCAACGTGATAAGAAATTTCGTTGAGGACGCTTTACTGCGGCCGAATGTTGGGGAAATGCCGCTGCTAGTTGACACCTATATTTTAGACCTCAAATCAGGTGGGACTACCCGCTGAACTTAA	KC457179	SH237966.06FU		Plant pathogen		Fungi	Basidiomycota	Pucciniomycetes	Pucciniales		Eucronartium	JX852332	Eocronartium_sp_I12F_02262
GL08600	ID1YYUI02J10YN	GCATCTTGCGCTCTTTGGTATTCCGAAGAGCATGCCTGTTTGAGTGTCATGAAACTCTCACCTCCAATCTTTTTTAACTAGAAGGTTGGGGCGTGGACGTGAGTGCTGCTGGTGCCCTGGCTGCATCGGCTCACTTGAAATTCATTAGCTGAATCCTTTAAAGTAGGTTCTACTCGACGTGATAAGATCTCCGTCGAGGACAGTGCTTCGGCATTGGCCAACGATAAAGTTGATACGCTTCTAATTAGCGCAGACTTCGAGTGCTGGCAATTTGACAACTTGGCCTCAAATCAGGTAGGACTACCCACTGAACTTAA	DQ645522	SH212070.06FU		Saprotroph	Yeast	Fungi	Basidiomycota	Tremellomycetes	Cystofilobasidiales	Cystofilobasidiaceae	Cystofilobasidium	JF501393	Cystofilobasidium_capitatum
GL10134	ID03IXK02IN4V9	ACTCGTCATCGATGAAGAACGCAGCGAAATGCGATAAGTAATGTGAATTGCAGAATTCAGTGAATCATCGAATCTTTGAACGCACCTTGCGCTCCTTGGTATTCCGAGGAGCATGCCTGTTTGAGTGTCATGAAACTCTCAACCTCTGACTTTCTTAATCGTCGGTCAGCGGCTTGGATGTGGGCGCTGCCGGTCTCAATTGATCGGCTCGCCTGAAAAACATTAGCGAATCCCTTCTGTAATCGGTTCCACTCGACGTGATAAGTATTTCGTCGAGGACATCTTTATTGATGGCCGAGATAAAGCTGGTTTAAGATCTGCTTCTAACTCTTTCGTTGCCTTCTGGTAAAGAAAACCCCTCATGATCTGGCCTCAAATCAGGTAGGACTACCCGCTGAA…	AB072229	SH217650.06FU		Saprotroph	Yeast	Fungi	Basidiomycota	Tremellomycetes	Cystofilobasidiales	Cystofilobasidiaceae	Udeniomyces	GU054317	uncultured_fungus
GL10073	ID1YYUI01BY7QP	TAGCTCGTCACCGATGAAGAACGCAGCGAATTGCGATAAGTAATGTGAATTGCAGAATTCAGTGAATCATCGAATCTTTGAACGCATCTTGCGCCCTCTGGTATTCCGGAGGGCACGCCTGTTTGAGTGTCATGAAACTCTCACCCCTTCCCTTTCTTAATTGATTGGGGTAGACGGTGGACGTGAGTGTTGCCGGTGTTAATCATCGGCTCGCTTGAAATACATTAGCAGAATCCTTTACCTTTTGGTTCTACTCAACGTGATAAGTACTCCGTTGAGGACAGCGCGCCTTCGGGTGTGTTGGCCAATCGATTTAGTTGATACGCTTCTAATCAGTACAGACTTCGGGAGCTGACAATTATGACAATCTGGCCTCAAATCAGGTGGGACTACCCGCTG…	EF159400	SH233309.06FU		Saprotroph	Yeast	Fungi	Basidiomycota	Tremellomycetes	Cystofilobasidiales			GU328553	uncultured_Basidiomycota
GL41970	IJOVCJS01EH3JS	CTAGACTCGTCATCGATGAAGAACGCTGCGAAATGCGATAAGTAATGTGAATTGCAGAATTCAGTGAATCATCGAATCTTTGAACGCACCTTGCACCTTTTGGTATTCCGAAAGGTATGCCTGTTTGAGTGTCTTGAAACCTCACACCCTAGAGTTTTCTCTAGGGACGTGGATTTGGGTGTTGCACCTTGCTCACCTTGAATTTCTTAGTGGTTCCAACCGTAGCCTGATGTAATAAGTTTCATCTGGTCAAGGGAAGACTGCTTCTAATCGCCTCGCGGCACTATTTAAGACTAGACCTCAAATCAGGTAGGACTACCCGCTGAACTTAA	AM999645	SH198310.06FU		Saprotroph	Yeast	Fungi	Basidiomycota	Tremellomycetes	Cystofilobasidiales			JN032540	uncultured_fungus
GL11275	ID03IXK02IXHA7	GCCTGTTTGAGTGTCATGAAACTATCAACCATGACTTGGGTTTTTCCCTTGTTCTTGGCTTGGATTTGGGTGCTTGCAGCACTTTGGTGTGCTGCTCACCTTAAAAGAATTAGCTGGACATGTCGCATGACTTGGTTCTACTTGGCGTAATAAGTATTTCGCTGAGGACATCCCTTGGGGTGGCCAGGACTTGTGGTGGACGTCTGCTTTCTAACCTCATAGTCTCTCGGGACATGACTTTTATGATCTGGCCTCAAATCAGGTAGGACTACCCGCTGAACTTAA	EU218878	SH203518.06FU		Saprotroph	Yeast	Fungi	Basidiomycota	Tremellomycetes	Filobasidiales	Filobasidiaceae	Cryptococcus	GU174399	uncultured_fungus
GL42206	IJOVCJS01B8R0T	CTAGACTCGTCATCGATGAAGAACGCAGCGAAATGCGATAAGTAATGTGAATTGCAGAATTCAGTGAATCATCGAATCTTTGAACGCACCTTGCGCCCTTTGGTATTCCGAAGGGCATGCCTGTTTGAGTGTCATGAAACCTCACCCCACTTGGGTTTTTGCCCGAGCGGTGGTGGATTGGGCGTCTGCCGTTAATGGCTCGCCTGAAAAGCATAAGCAACTTTGGATGTAATACGTTTCATCCTTTCGAGTGGCTGACAACCCCACATATCTCATGATCTGGCCTCAAATCAGGTAGGGCTACCCGCTGAACTTAA	HQ875391	SH198057.06FU		Saprotroph	Yeast	Fungi	Basidiomycota	Tremellomycetes	Filobasidiales	Filobasidiaceae	Cryptococcus	NR077070	Cryptococcus_heimaeyensis
GL49633	IGJRWKL02JY1LB	CTAGACTCGTCAACGATGAAGAACGCAGCGAAATGCGATAAGTAATGTGAATTGCAGAATTCAGTGAATCATCGAATCTTTGAACGCACCTTGCGCCCTTTGGTATTCCGAAGGGCATGCCTGTTTGAGTGTCATGAAACCTCACTCCACTTGGGTTTTTGCCTGAGTGGTAGTGTATTGGGTGTTGCCTTGCCAAAGGCTCGCCTTAAAAGAATAAGCACCTTGGATGTAATACGTTTCATCCTTCTGGGTGGCTAATAACCCCACATATCTCATGATCTGGCCTCAAATCAGGTAGGGCTACCCGCTGAACTTAA	DQ000318	SH198056.06FU		Saprotroph	Yeast	Fungi	Basidiomycota	Tremellomycetes	Filobasidiales	Filobasidiaceae	Cryptococcus	JF495251	uncultured_Cryptococcus
GL17530	IJOVCJS01C6U2H	CTAGACTCGTCATCGATGAAGAACGTGGCGAAATGCGATAAGTAATGTGAATTGCAGAATTCAGTGAACCATCGAATCTTTGAACGCACCTTGCGCCCGTTGGTATTCCGACGGGCATGCCTGTTTGAGTGTCGTGAACAACCTCAACCTTGGTTGGTTTTACCATCAAGGCTTGGACTTGGGTGTTGCTGCTGCAAAGTGGCTTGCCTTAAAACTATTAGCTGGACTTGTCTATGACTTGGTTCGACTCGATGTAATAAGTATTCATCGGGGACAGGGTTAAAACCTGGCCAAGGCTTGATGCCGTCTGCTTCTAATCATGTTCTCACTATGAGACGCTACTTTACTGTGTGGCCTCAAATCAGGTAGGATTACCCGCTGAACTTAA	AY462120	SH230598.06FU		Saprotroph		Fungi	Basidiomycota	Tremellomycetes	Holtermanniales		Holtermanniella	AF287152	Microbotryum_duriaeanum|Tremellomycetes|
GL31760	IJOVCJS01BQQSW	CTTAGACTCGTCATCGATGAAGAACGCTGCGAAATGCGATAAGTAATGTGAATTGCAGAATTCAGTGAGTCATCGAATCTTTGAACGCACCTTGCGCCTTTTGGTATTCCGAAAGGCATGCCTGTTTGAGTGTCATGAAATATCAACCCCTCCTGGTTTCTGATCAGTGTTGGGCTTGGACTTGGGTGTCTGCCAGTTCGCTGGCTCGCCTTAAAAGAGTTAGTGGTAATAACATCCACGGCTAAGACGTAATAAGTTTCGTCTGGTCAAGGTGTGACGACTGCTCATAACCCGACCGCAAGGTCATTATTTTATGCTCTGACCTCAAATCAGGTAGGACTACCCGCTGAGCTTAA	HE650881	SH234350.06FU		Saprotroph		Fungi	Basidiomycota	Tremellomycetes	Tremellales		Bulleromyces	HQ267065	uncultured_fungus
GL28512	ID03IXK02JYI73	CCTGTGTGCCTTGACCCCGAGACGCCGACCACACCACTCGTCTAGACTCGTCACCGATGAAGAACGCAGCGAAATGCGATAAGTAATGTGAATTGCAGAATTCAGTGAATCATCGAATCTTTGAACGCACCTTGCGCCCTCTGGTATTCCGGAGGGCATGCCTGTTTGAGTGTCATGTAGACTCAATCCCTCGGGTTTCCGAGGAGATTGGACTTGGGTGTTGCCGCTCTGCCGGCTCGCCTTAAAAGACTTAGCGGGATAGCACCGTAGTCGGCGTAATAAGTTTCGTCGGTGAAGGTTGTGATGACTGCTTACAATCGCCCTCGGGCAATTTTTGACTCTGACCTCAAATCAGGTAGGACTACCCGCTGAACTTAA	AF444321	SH197001.06FU		Saprotroph	Yeast	Fungi	Basidiomycota	Tremellomycetes	Tremellales		Cryptococcus	NR073213	Cryptococcus_podzolicus
GL15230	IJOVCJS01B2SFA	TAGACTCGTCATCGATGAAGAACGTAGCGAAATGCGATAAGTAATGTGAATTGCAGAATTCAGTGAATCATCGAATCTTTGAACGCACCTTGCGCCCTTTGGTATTCCGAAGAGCATGCCTGTTTGAGTGTCATGAAACTATCAACCCTGACTTGGTTTACTCCTCGTCTTGGCTTGGACTTGGGTGTTTGCTGCTGCAAAGCTGCTCGCCTTAAATGGATTAGCTGGACCTGCTTTGAGACTAGGTTTGACTCGGCGTAATAAGTTATTTCGCTGAGGACATCTTCGGATGGCCTAATCGCTTTGCGAACGTCTGCTCTCTAACCCGTTCCCACTTGGGACATGACTTTTTATTTTGGCCTCAAATCAGGTAGGACTACCCGCTGAACTTAA	KC916651	SH226567.06FU		Saprotroph	Yeast	Fungi	Basidiomycota	Tremellomycetes	Tremellales		Cryptococcus	AB520592	uncultured_fungus
GL27739	IGJRWKL02GW5HD	CTAGACTCGTCACCGATGAAGAACGCAGCGAAATGCGATAAGTAATGTGAATTGCAGAATTCAGTGAATCATCGAATCTTTGAACGCACCTTGCGCCTTTTGGTATTCCGAAAGGCATGCCTGTTTCAGTGTCATGAAATCTCAATCTAATATGTTTTCTGAACATGTTAGGCTTGGACTTGGGTGTCTGCCAGCAATGGCTCACCTCAAATGACTTAGTGGAACATCCCACATCAGTGTTAGACGTAATAAGTTTCGTCTCTCCTTGTGGTGATGACTGCTCAAAACCTGCCATTGCGCACCTTTTGACTTTGACCTGAAATCAGGTAGGGCTACCCGCTGAACTTAA	AM176645	SH219359.06FU		Saprotroph	Yeast	Fungi	Basidiomycota	Tremellomycetes	Tremellales		Cryptococcus	KC294319	Cryptococcus_flavescens
GL35201	ID03IXK02GAUPZ	CTAGACTCGTCATCGATGAAGAACGCAGCGAAATGCGATAAGTAATGTGAATTGCAGAATTCAGTGAATCATCGAATCTTTGAACGCACCTTGCGCCCTCTGGTATTCCGGAGGGCATGCCTGTTTGAGTGTCATGTAGACTCAATCCCTCGGGTTTCCGAGGAGATTGGACTTGGGTGTTGCCGCTCTGCCGGCTCGCCTTAAAAGACTTAGCGGGATAGCACCGTAGTCGGCGTAATAAGTTTCGTCGGTGAAGGTTGTGATGACGACTGCTTACAATCGCCCTTGGGCAATTTTTGACTCTGACCTCAAATCAGGTAGGACTACCCGCTGAACTTAA	AF444321	SH197001.06FU		Saprotroph	Yeast	Fungi	Basidiomycota	Tremellomycetes	Tremellales		Cryptococcus	GU174409	uncultured_fungus
GL43204	IGJRWKL02IF9UT	CTAGACTCGTCAACGATGAAGAACGCAGCGAAATGCGATAAGTAATGTGAATTGCAGAATTCAGTGAATCATCGAATCTTTGAACGCATCTTGCGCCCTTTGGTATTCCGAAGGGCATGCCTGTTTGAGTGTCATGAAACCTCACCCCACTTGGGTTTTTGCCTGAGCGGTGGTGTATTGGGTGTTGCCTTGCTAAAGGCTCGCCTTAAAGACATAAGCACCTTGGATGTAATACGTTTCATCCTTCTGGGTGGCTGATAACCCCACATATTCATGATCTGGCCTCAAATCAGGTAGGGCTACCCGCTGAACTTAA	FJ573143	SH198055.06FU		Saprotroph	Yeast	Fungi	Basidiomycota	Tremellomycetes	Tremellales		Cryptococcus	NR073260	Cryptococcus_victoriae
GL50774	IJOVCJS01CPJK2	CTAGACTCGTCACCGATGAAGAACGCAGCGAAATGCGATAAGTAATGTGAATTGCAGAATTCAGTGAATCATCGAATCTTTGAACGCAGATTGCGCCCTTTGGTATTCCGAAGGGCATGCCTGTTTGAGTGTCTTATAAACCTCACCTCTATAGTTTTCTATAGTTGTGCTTTGGGTGTTGCCGTTTACTCTGGCTCGCCTTAAATGTCTAAGTGGAATGCGTAATAAGTTCTCGCAACCCTCCACTCTAACACACTTTATATTCTGACCTCAAATCAGGTAGGACTACCCGCTGAACTTAA	AY562153	SH196959.06FU		Saprotroph		Fungi	Basidiomycota	Tremellomycetes	Tremellales		Dioszegia	JQ857033	Dioszegia_sp_T29Ds
GL50831	ID1YYUI01AE401	CTAGACTCGTCAACGATGAAGAACGCAGCGAAATGCGATAAGTAATGTGAATTGCAGAATTCAGTGAATCATCGAATCTTTGAACGCACATTGCGCTCTTTGGTATTCCGAAGAGCATGCCTGTTTGAGTGTCATATAGACTCATCCTCTCGGGTTTCCGAGTTGGGTGCTTTGGACGTCTGCCATGCTTTGGCTCGTCTTAAATGTCTAAGTGGAATGCGTAATAAGTTTTCGCTCCCTCCACTCTAATACACTTTTATCTCTGACCTCAAATCAGGTAGGACTACCCGCTGAACTTAA	AF314985	SH197185.06FU		Saprotroph	Yeast	Fungi	Basidiomycota	Tremellomycetes	Tremellales		Hannaella	AF444485	Hannaella_coprosmaensis
GL31921	IGJRWKL02HSZJZ	CTAGACTCGTCAACGATGAAGAACGCAGCGAAATGCGATAAGTAATGTGAATTGCAGAATTCAGTGAATCATCGAATCTTTGAACGCACCTTGCGCCTCTTGGTATTCCGAGAGGCATGCCTGTTTGAGTGTCATGAATCATCAATCCCACGGGTTTCTCACCCGTGTGGACTTGGAACTGGGCGTCTGCCTCCCAAGGCTCGCCTCAAATGACTTAGTGGGAACTTCTCGACCTACGCCTGACGTGATAAGTTTCGTCTCGGCCGGTCCTGAGGCCCGCTCACAACCACCAATCTTTTGACATTGACCTCAAATCAGGTAGGGCTACCCGCTGAACTTAA	AB042228	SH195539.06FU		Saprotroph	Yeast	Fungi	Basidiomycota	Tremellomycetes	Tremellales		Kockovaella	AJ608657	Fellomyces_sp_CBS_8283
GL29608	ID1YYUI02FY11D	CTAGACTCGTCAACGATGAAGAACGCAGCGAAATGCGATAAGTAATGTGAATTGCAGAATTCAGTGAATCATCGAATCTTTGAACGCAACTTGCGCCCTCTGGTATTCCGGAGGGCATGCCTGTTTGAGTGTCATGAAACCTCAATCCCCCAGGGTTCTGCTCTGTTGGGTGCATTGGATTTGGGCGTTGCCGGCCTGGCCGGCTCGCCTTAAAGGCGTTAGTGGGATCAGCAGACCCGATCGGCGTAATAAGTTTCGCTGAGGAGGTTTGCGCGAGCCCGCTCACAACCCTCTCCTTTGGAGAACACTCTTTTGATCTGACCTCAAATCAGGTAGGACTACCCGCTGAACTTAA	EF619865	SH223576.06FU		Mycoparasite		Fungi	Basidiomycota	Tremellomycetes	Tremellales		Tremella	KC171330	Tremella_sp_ATCC_MYA_4668
GL25358	IGJRWKL02JME1J	CTAGACTCGTCATCGATGAAGAACGCTGCGAAATGCGATGAGTAATGTGAATTGCAGAATTCAGTGAATCATCGAATCTTTGAACGCAACTTGCGCCCTCTGGTATTCCGGAGGGCATGCCTGTTTGAGTGTCATGAAACCTCAATCCCCCAGGGTTCTGCTCTGTGGAAGATTGGACTTGGGCGTCTGCCGGCTTTGGCCGGCTCGCCTTAAATGTGTTAGTGGGATCAGCAGCCCCGATCGGCGTAATAAGTTTCGCTGAAGAGGGAGGCCCGAGCCCGCTCATAACCATCTCCTTACGGAGAACACTCTTATGATCTGACCTCAAATCAGGTAGGACTACCCGCTGAACTTAA	EF619865	SH223576.06FU		Mycoparasite		Fungi	Basidiomycota	Tremellomycetes	Tremellales		Tremella	KC171330	Tremella_sp_ATCC_MYA_4668
GL31626	ID1YYUI02G00IM	CTAGACTCGTCATCGATGAAGAACGCTGCGAAATGCGATAAGTAATGTGAATTGCAGAATTCAGTGAATCATCGAATCTTTGAACGCAACTTGCGCCCTCTGGTATTCCGGAGGGCATGCCTGTTTGAGTGTCATGAAACCTCAATCCCCCAGGGTTCTGCTCTGTTGGGTGCATTGGATTTGGGCGCTGCCGGCCTGGCCGGCTCGCCTTAAAGGCGTTAGTGGGATCAGCAGACCCGATCGGCGTAATAAGTTTCGCTGAGGAGGTTTGCGCGAGCCCGCTCACAACCCTCTCCTTTGGAGAACACTCTTTTGATCTGACCTCAAATCAGGTAGGACTACCCGCTGAACTTAA	EF619865	SH223576.06FU		Mycoparasite		Fungi	Basidiomycota	Tremellomycetes	Tremellales		Tremella	KC171330	Tremella_sp_ATCC_MYA_4668
GL49809	ID03IXK02HAGGN	CTAGACTCGTCACCGATGAAGAACGCAGCGAAATGCGATAAGTAATGTGAATTGCAGAATTCAGTGAATCATCGAATCTTTGAACGCACCTTGCGCCCTCTGGTATTCCGGAGGGCATGCCTGTTTGAGTGTCATGTAGACTCAATCCTCGGGGTTTCCTGGGATTGGACTTGGGCGTTGCCTCTGGCTCGCCTCAAATGCCTTAGCTGTGGAGTGTCAGTGGACGTAATAAGTTTCGTCCCCAAAGCACGACGTGGCTCATAACCCCATCTTTTGACTTAGACCTCAGATCAGGTAGGACTACCCGCTGAACTTAA	DQ054542	SH197004.06FU		Mycoparasite		Fungi	Basidiomycota	Tremellomycetes	Tremellales		Tremella	JN790587	Tremella_diploschistina
GL29543	IGJRWKL02HGYWO	CTAGACTCGTCAACGATGAAGAACGCAGCGAATCGCGATACGTAATGTGAATTGCAGAATTCAGTGAATCATCGAATCTTTGAACGCACCTTGCACCCTCTGGTATTCCGGAGGGTATGCCTGTCTGAGTGTCACGTCAATCATCGTCCCGACGGGTTCTGCCCGTCGGGGTCGGATCTGGGTGTTGCCCTTCACGGGGCTCGCCTCAAATGTCTCGGTGGTCTGCTTGCGGGCCGTGGTCTTGCGTGATATGTATCGCTCGACTGTGGTCCGTTCGACCTCCTCGAAACCGCCCTTGTGCAAGCTCGGGATTTACTGTGATAGACCTCAGATCAGGTAGGACTACCCGCTGAACTTAA	AF444409	SH241220.06FU				Fungi	Basidiomycota	Tremellomycetes	Tremellales			AM999593	uncultured_fungus
GL39246	ID1YYUI01DT79V	CTAGACTCGTCATCGATGAAGAACGTGGCGAAATGCGATAAGTAATGTGAATTGCAGAATTCAGTGAATCATCGAATCTTTGAACGCAACTTGCGCCCTCTGGTATTCTGGAGGGCATGCCTGTTTGAGTGTCATGTAGACTCAACCCCTCGGGTTTCCGAGTAGGTTGGATTTGGGTGTTGCCTGTGTCTGGCTCGCCTTAAAGAACTTAGTGGAGATAGCATCCTAGTCGACGTAATAAGTTTCGTCGGTGATGGTGTGAAGTCTGCTCATAACTGCCCTTGGGCACTTTTTGACTCCGACCTCAAATCAGGTAGGACTACCCGCTGAACTTAA	DQ054542	SH197004.06FU				Fungi	Basidiomycota	Tremellomycetes	Tremellales			JN032527	uncultured_fungus|Tremellales|
GL40249	IGJRWKL02FURV1	CTAGACTCGTCACCGATGAAGAACGCAGCGAAATGCGATAAGTAATGTGAATTGCAGAATTCAGTGAATCATCGAATCTTTGAACGCATCTTGCGCCCTTTGGTATTCCGAAGGGCATGCCTGTTTGAGTGTCATGAAAACATCATCCCATCGGGTTTCCGATGACGATGGATTTGGGTGTTGCCGTCTCGGCTCGCCTTAAAAGTGTTAGTGGTTCTAAGATTGAATCTGGCGTAATAAGTTTCGCTGGCCAAGATCGAAGGCTGCTCATAACCCGTCTTCTGACATCTTTTGCTCTGACCTCAAATCAGGTAGGACTACCCGCTGAACTTAA	JF449474	SH198016.06FU				Fungi	Basidiomycota	Tremellomycetes	Tremellales			FJ237146	uncultured_fungus
GL10267	ID1YYUI01DXHBI	CTAGACTCGTCATCGATGAAGAACGCTGCGAAATGCGATAAGTAATGTGAATTGCAGAATTCAGTGAATCATCGAATCTTTGAACGCACCTTGCGCTCTATGGTATTCCGTAGAGCATGCCTGTTTGAGTGTCATGAAAACAATCAACCTTGACTTTGGTTTACTCCATTGACTCGGCTTGGACTTGGGTGTTTGCCATCTTCACGGATGGCTCACCTTAAATGCATTAGCTGGACTTGTTTGTGAGGATCGGTTTGACTTGGCGTAATAAGTATTTCGCTGAGGACATCTTTCGAGATGGCCGAACTTCTCGACGTCTGTCTGCTTTCCAACCACGTTCTCCCTTGGGAGACATGACTATTTTATTATCTGGCCTCAAATCAGGTAGGACTACCCGCT…	KC457137	SH217850.06FU		Saprotroph	Yeast	Fungi	Basidiomycota	Tremellomycetes			Cryptococcus	GU328609	uncultured_Basidiomycota
GL16116	ID1YYUI01BBCU6	CTAGACTCGTCATCGATGAAGAACGCTGCGAAATGCGATAAGTAATGTGAATTGCAGAATTCAGTGAATCATCGAATCTTTGAACGCAAATTGCGCTCCTTGGTATTCCGAGGAGCATGCCTGTTTGAGTGTCATGAAATCATCCACCTCTACTTTGGGCTTTTGTCCGGGGTTCTGGCTGGGAGTTGGGTGTTTGCCTGCGAGAACTGGCTCACCTTAAATGAATTTCGGTCTGACTAGTGGCTAATGGCCGGTTTGACTTGGCGTTTTAAGTTATTTCGCTAAGGACATCCTTCGGGGTGGCCGATCATGGACTCTGGTCTCGCTTCTAACGAGGCAACATATTTTGACATCTGGCCTCAAATCAGGTAGGACTACCCGCTGAACTTAA	AM999582	SH215230.06FU		Saprotroph	Yeast	Fungi	Basidiomycota	Tremellomycetes			Cryptococcus	HM240834	uncultured_fungus
GL45621	IGJRWKL02G1T7S	CTAGACTCGTCACCGATGAAGAACGCAGCGAAATGCGATAAGTAATGTGAATTGCAGAATTCAGTGAATCATCGAATCTTTGAACGCATCTTGCGCCCTTTGGTATTCCGAAGGGCATGCCTGTTTGAGTGTCATGAAAACATCATCCCATCGGGTTTCCGATGGCATGGACTTGGGTGTTGCCGTCCGGCTCGCCTCAAAAGCCTTAGTGGTTCGATCGAATCTGGCGTAATAAGTTTCGCTGGCCTAGTGACGTCTGCTTTACCCGTCTTCTGACATTTTTGCTCTGACCTCAAATCAGGTAGGACTACCCGCTGAACTTAA	HQ211675	SH198014.06FU		Saprotroph	Yeast	Fungi	Basidiomycota	Tremellomycetes			Cryptococcus	AY188379	Tremella_sp_H_08013
GL08265	IGJRWKL02FOV27	GTATTCCGTGGAGCATGCCTGTTTGAGTGTCATGAAAACAATCAACCTTGACTTTGGTTTAACTACTATTGACTCGGCTTGGACTTGGGTGTTTGCCATCTTTACGGATGGCTCACCTTAAATTGATTAGCTGGACTTGTCTTGACGGCTGGTTTGACTCGGTGTAATAAGTATTTCACTGAGGACATCTTTCGGGATGGCCAACCGCTTGACTATGGTCTGCTTTCTAACCCTGTTCTCTTTTAGAGTACGTTTTTTATACATCTGGCCTCAAATCAGGTAGGACTACCCGCTGAACTTAA	KC457137	SH217850.06FU				Fungi	Basidiomycota	Tremellomycetes				AF479758	Chlorella_sp_TKF1|Eukaryota
GL10105	ID03IXK02GCPY6	CTAGATCGTCACCGATGAAGAACGCAGCGAAATGCGATAAGTAATGTGAATTGCAGAATTCAGTGAATCATCGAATCTTTGAACGCAAATTGCGCTCCTTGGTATTCCGAGGAGCATGCCTGTTTGAGTGTCATGAAATCATCCACCTCACCTTTGGGCTTTTGTCCGAGGGTCCGGCTGGGACTTGGGTGCTTGCGCGGAGTTGATCCCCGCTCACCTTAAATGTATTGTAGTGATCCTGCCTGCCGGCCGGTTTGACTTGGCGTTATAAATTATTTCGCTGAGGACACTCGCAAGGGTGGCCGACTGAATCGCTTGATCTCGCCTCAAAGTGCACAACACCTAGAGAGGCTACCACATTCTTGACATCTGGCCTCAAATCAGGTAGGACTACCCGCT…	JN053505	SH233473.06FU				Fungi	Basidiomycota	Tremellomycetes				AM902025	uncultured_Basidiomycota
GL10656	IGJRWKL02IHT8R	CGATGAAGAACGCAGCGAAATGCGATAAGTAATGTGAATTGCAGAATTCAGTGAATCATCGAATCTTTGAACGCACCTTGCGCTCCATGGTATTCCGTGGAGCATGCCTGTTTGAGTGTCATGAAAACAATCAACCTTGGTTTTGGGGCAACCCTCGATCTCGGCTTGGACTTGGGCGTTTGCCATCCTCACGGGTGGCTCGCCTCAAATGAATTAGCTGGACCTGTTTGTGAGGAATGGTTCTACTCGGCGTAATAAGTATTTCGCTGAGGACATGGCTTCGGCTGTGGCCTTCTTCTCGACGATCGTCTGCTTTCAAACCCCGTTCTCCTCGGAGACGCACTTTTTATGATCTGGCCTCAAATCAGGTAGGACTACCCGCTGAACTTAA	KC457137	SH217850.06FU				Fungi	Basidiomycota	Tremellomycetes				HQ212291	uncultured_Tremellomycetes
GL27674	IJOVCJS01D72MG	AAAAAACGGAAAGATCGACTCGCCTTAAATGGATTAGTGGTCTAGTCGCCTTTGCTGGTTAACTTGGTCTTGACATGATAAGAAATTGTCGTCGGGTACTAATGTTTTTGTCTTGCCTAGCAAGAGTCAGTGAATGTGCGCGATCTGCTTCTAACGCTGTGTTTGGTTAAACAAACCCAAATTTTATGATCGGGCCTCAAATCAGGTAGGACTACCCGCTGAACTTAA	DQ661028	SH228077.06FU				Fungi	Basidiomycota	Tremellomycetes				HF558647	Phaffia_sp_CBS_11768
GL32580	ID03IXK02F4SE2	CTAGACTCGTCATCGATGAAGAACGCAGCGAAATGCGATGAGTAATGTGAATTGCAGAATTCAGTGAATCATCGAGTCTTTGAACGCACCTTGCGCCCTCTGGTATTCCGGAGGGCATGCCTGTTTGAGTGTCATGAAACTCTCAACCCCTCGGGTTTTACGACCTGTCGCGGTTGGATTTGGGCGCTGCCGCTTCATTGCCGGCTCGCCTCAAAGGTCTTAGTGGGAATAGTTGGACCCATAGCTTGGCGTAATAAGTTTCGCTGGGCTCGTGGCCGACGACCGTCCGCTGACAACAACCAATACTTTTATGATCTGACCTCAAATCAGGTAGGGCTACCCGCTGAACTTAA	AF444337	SH234490.06FU				Fungi	Basidiomycota	Tremellomycetes				AM901961	uncultured_Basidiomycota
GL40336	ID1YYUI01A5MNH	CTAGACTCGTCATCGATGAAGAACGCAGCGAAATGCGATAAGTAATGTGAATTGCAGAATTCAGTGAATCATCGAATCTTTGAACGCACCTTGCGCCCTTTGGTATTCCGAAGGGCATGCCTGTTTGAGTGTCATGAAATCATCAATCTCTAAGGTTTCTTATTGATTGGACTTGGGCGTCTGCCATCTGGCTCGCCTTAAATGCAATAGCGACACGAAAGTGAAATCTAGCGTAATAAGTTTCGTTAGAGGCAGCCGACGTTCGCTCCTAATCGTCTTCGGACAATCTTTTGACTCTGACCTCAAATCAGGTAGGACTACCCGCTGAACTTAA	JX898578	SH218738.06FU				Fungi	Basidiomycota	Tremellomycetes				AM999701	uncultured_fungus
GL41054	ID03IXK02HTDOZ	CTAGACTCGTCAACGATGAAGAACGCAGCGAAATGCGATAAGTAATGTGAATTGCAGAATTCAGTGAATCATCGAATCTTTGAACGCACCTTGCGCCCTTTGGTATTCCGAAGGGCATGCCTGTTTGAGTGTCATGAAATCATCAATCTCTAAGGTTTCTTATTGATTGGACTTGGGTGTTGCCAGTGGCTCGCCTTAAAAGTGTTAGCGATACAGATGTGAATCCTGGCGTAATAAGTTTCGTCAGAGTAAGCATTATGTTTGCTTCTAATCGTCGCAAGACAATCTTTTGACTCTGACCTCAAATCAGGTAGGACTACCCGCTGAACTTAA	JX898578	SH218738.06FU				Fungi	Basidiomycota	Tremellomycetes				AM999701	uncultured_fungus
GL05352	ID1YYUI02INWMT	TCTTTTGTAAGAGTTGGCGGATCGGTATTGAGGGTTTTGCCATTCACCGTGGCTCCCTCGAAATGCATTAGCGCATCCATTTGATAGGCAAGACGGACGAAAGCTCGATTTTCGCTCTCTCTTCCCTGCCGGGTTTTGATAATATCAGGACTTCGGAGAGGTTGAGATGGGTAAGAGCTGGACGCAACGGCTTGCTGTTTGGAGTGCTTCTGAAACCCGCCCATATCGAGCTTTGCCTCGGAAGGGATTTTAATAATTCATCGGCCTCAGATTGGTAGGACTACCCGCTGAACTTAA	KF381003	SH237191.06FU		Plant pathogen		Fungi	Basidiomycota	Ustilaginomycetes	Ustilaginales	Ustilaginaceae	Ustilago	EU516997	uncultured_Ustilago
GL07640	IGJRWKL02IZCHB	CTAGACTCGTCATCGATGAAGAACGCAGCGAAATGCGATAAGTAATGTGAATTGCAGAATCCAGTGAATCATCGAATCTTTGAACGCAACTTGCGCCCTCTGGTAATTCCGGAGGGCATGCCTGTTTGAGTGTCGTGAACACCTCAACCCTCCAATGTTTTTGCATTAGAGGTGTTGGTAGTGAGCGCTGCCGGACTTTGGGTCGGCTCGCTTTAAAATCATTAGCTGGATCTATTCTGACCTGGTTCTACTCGGCGTAATAAGTTATTATCGTCGAGGACGCTTGTCTTTCTAGGCAGGCGGCCACAGTAAGGGTGTTTGAACCGCTTCCAACACGTCTTGCTCTTGTAGCAAACACTTGAACCTCTGACCTCAAATCAGGCAGGACTACCCGCTGAA…	KC818343	SH204175.06FU		Saprotroph		Fungi	Basidiomycota	Wallemiomycetes	Geminibasidiales			HM240179	uncultured_Basidiomycota
GL10776	ID03IXK02JS05R	CTAGACTCGTCACCGATGAAGAACGCAGCGAAATGCGATACGTAATGTGAATTGCAGAATTCCGTGAATCATCGAATCTTTGAACGCACATTGCACTCTGTTTCGGCAGAGTATGCCTGTTTGAGAATCTATAGTATTCATTTTCCAACTTTGGGTATTTATATCTAAGGAAGGAGAGATTTGAGGCGTCACACTAACCCTGCGTGCTTTTAAAACTATAGCTGCTGGATACTGTCAAGTAACGGAAAAGTATGTGTATGGGACTTCGGTTTCTCTAATACCCAGTACGTGTGATGGAATTTGTCTGGCACTCACCTATTAAAGTTAGCCTTCGGGTTAACTTGAACCATGGTCTCAAATCAGGCAGGAAGACCCGCTGAACTTAA	FN391363	SH218302.06FU			Flagellate	Fungi	Chytridiomycota	Chytridiomycetes	Rhizophydiales	Rhizophydiaceae	Rhizophydium	DQ485626	Rhizophydium_sp_JEL_385
GL11734	ID03IXK02HPF1J	CTAGACTCGTCAACGATGAAGAACGCAGCGAAATGCGATACGTAATGTGAATTGCAGAATTCCGTGAATCATCGAATCTTTGAACGCACATTGCACTCTGTTTCGGCAGAGTATGCCTGTTTGAGAATCTATAGTATTCATTCTCCAACTTTGGGTAGAAATACCTAGGGAAGGGGAGATTTGAGGCGTCGCACTAACACTGCGTGCTTTTAAAACTATAGCTGCTGGATACTGTCAAGTAACGGAAAAGTATGTGTATGGAACTTCGGTTTCTCTAATACTCAGTACGGGTGACGGTGCTCGTTCGGCACTCAACTATTAAAGTCAACCTCGGTTGGCTTGAACCATGGTCTCAAATCAGGCAGGAAGACCCGCTGAACTTAA	FN391363	SH218302.06FU			Flagellate	Fungi	Chytridiomycota	Chytridiomycetes	Rhizophydiales	Rhizophydiaceae	Rhizophydium	FN391362	uncultured_fungus
GL28431	ID03IXK02GHJ7C	CTAGACTCGTCATCGATGAAGAACGCTGCGAAATGCGATACGTAATGTGAATTGCAGAATTCCGTGAATCATCGAATCTTTGAACGCATATTGCACCTCTCCGGAGGTATGCCTGTTTGAGAATCTATAGTATCTTTTCCCCAGTTTTGGGGGAGATTTGGGGCGTCTCTTTTGGGTGCCCTTAAAGCTATAGCTTGACACTGGACGAGTGCGAGAGCGTATGTATTTGAAACTCTTTGAGTGCCCTATACGAAACTCTGGCGCGAGCTCGGACTGGGCCAAGTTCACCACGGAGGTTTGAAAAAGAACCCGAACCATGGTCTCAAATCAGGTAGGAGGACCCGCTGAACTTAA	AY349123	SH199222.06FU			Flagellate	Fungi	Chytridiomycota	Chytridiomycetes	Rhizophydiales	Rhizophydiaceae	Rhizophydium	DQ485684	Rhizophydium_sp_PL_153
GL08752	IGJRWKL02JBMUI	CTAGACTCGTCATCGATGAAGAACGCTGCGAAATGCGATAAGTAGTGTGAATTGCAGAATTCAGTGAATCATCGAATCTTTGAACGCACATTGCGCTTCCTGGTATTCCGGGGAGCATGCTCGTTTCAGAATCATTAAACTCTCAAAAACCATACGGTTTTCGGACCGTGTGGGGCTTGGATGTGTGCGGGAACTGCCCTCCGGGGCAGCCGCTTTAATTTGATTGTGTGTGTCACGGTAAACCATGCCGGGAACACAAGAGCAACAGATTTCTATTTCTCTTGTGACTCGGACGTGTGATATCGGATCATCCACCCCATCAATTATACAGGATGCGCCTCTACTTTGATGCGTGTTCTGATTACTTGGTCTGAAATCGAGCAAGAAAACCCGCTGAAC…	AY997075	SH190244.06FU		Plant pathogen	Flagellate	Fungi	Chytridiomycota	Chytridiomycetes	Spizellomycetales	Spizellomycetaceae	Powellomyces	JN943807	Powellomyces_sp_DAOM_226231
GL10277	ID1YYUI01BN7TX	CTAGACTCGTCACCGATGAAGAACGCAGCGAAATGCGATAAGTAGTGTGAATTGCAGAATTCAGTGAATCATCGAATCTTTGAACGCACATTGCGCTTCCTGGTATTCCGGGGAGCATGCTCGTTTCAGAATCATTAAACTCTCAAAAACCAGATGGTTCTCGGACCGTTTGGGGCTTGGATGTGGGCGGCACACTGTTCCTCTGGAACGGCCGCTTCAATATGATTGTGTGTATCTCGGTGAACCATCTCGGGAGCATAAGAGCAACAGATTTCTATTTCTCTTGTGGCCCGCGTCTGGTTTGTTTGGACTCCCACTCCATCCATCAGACAGGATGCGCATCGTTTTGATGTGTATTCTGATTACTTGGTCTGAAATCGAGCAAGAAAATCCGCTGAA…	AY997075	SH190244.06FU		Plant pathogen	Flagellate	Fungi	Chytridiomycota	Chytridiomycetes	Spizellomycetales	Spizellomycetaceae	Powellomyces	JN943807	Powellomyces_sp_DAOM_226231
GL00771	IGJRWKL02IYI3W	TAGTATCTAGACTCGTCAACGATGAAGAACGCAGCGAAATGCGATACGTAGTGTGAATTGCAGAATTCCGTGAATCATCGAATCTTTGAACGCATCTTGCACTCTGTTTCGGCAGAGTATGCCTGTTTGAGAATCTATAGACTTCTTTATCCGTAAGGGTAAGATTTGAGCTCTTCACAGTGTGAACTGCTTTAAAACTATAGCCTGGTACTGTAATGTTTATGGTAAGGTGCCAAAGTGTATGAAGGGTTCGCCCACGTCCTTTGAAGCTGATCCTAATTACGGCGCTTGGTCCACTGTGGTCCTAGTAGTAATACGAAGACCCGCTTAGCCTAGTCTCTAGGGACTAGTCTGAAACTTTGGTCTCAAATCAGGTAGGAAGACCCGCTGAACTTAA	EF585668	SH218813.06FU			Flagellate	Fungi	Chytridiomycota	Chytridiomycetes				HQ191313	uncultured_Chytridiomycota
GL03513	ID1YYUI01EJK0N	CTAGACTCGTCACCGATGAAGAACGCAGCGAAATGCGATAAGTAGTGTGAATTGCAGAATTCAGTGAATCATCGAATCTTTGAACGCACATTGCGCTCTCTGGTATTCCGGAGAGCATGCCCGTTTCAGAATCAGCAAATCATCCTCAACTCTTCCAAGCGTTCATTCGCTTTGGAACAGTTGGATTTTGGACGTGTTGTTTCCTTCCTTTTCGGCAACGTAGAAGTTGGAAACTCGTCTCAAATAGATGGGAAATGCTGGGGTCACCGTTTGAACGGACCTTGCAAAGCAGCAACAGTGATCTTCATTGATTTTGTTACTCTCTTTGTGCACGGGTCTTTAGGTACCTCGTTTTACAAGGCCTTTCCGAATCGCCCTTTTTGTACAGCCTTGCTGTCG…	AM999756	SH236556.06FU			Flagellate	Fungi	Chytridiomycota	Group1				AM999751	uncultured_fungus
GL04037	ID1YYUI01BNDS9	TCACCGATGAAGAACGCAGCGAAATGCGATAAGTAGTGTGAATTGCAGAATTCAGTGAATCATAGAATCTTTGAACGCACATTGCGCTCTCTGGTATTCCGGAGAGCATGCCCGTTTCAGAATCAGCAAATCATCCTCAATCCTCCCCAGGCGTTTGTTCGCTCGGGGACGGTTGGACTTTGGACGTGTCGTTTCTCCTTCCAGGCAACTGGGAAAGCGAAACTCGTCTCAAATTGATGGGAAATGCTGGGGTCACCGCTCAACGGACCTTGCAAAGCAGCAACAGTGATCGTCATTGATTTTGTTACTCTCTTTGCACTCGGGCCGCAGGTACCTCGTCTTACAAGGCCTTTCCGAATCGCCTTTTGGCAGCCTTGCTGCCGGGCAACAATCAAAAAC…	AM999756	SH236556.06FU			Flagellate	Fungi	Chytridiomycota	Group1				AM999751	uncultured_fungus
GL00940	ID03IXK02IP5KE	GGCCATTCCCTGAAAAATCCTTTATTGGAATGAATGGGTTGTGCTGAAATTCAGTGATCGGAGCTTGCGTGCTTAAAGGGTTTTCTCTCTAACAGTACCGTACTCTTTGATAACCGACATAGATTAATTGGGTACTTGTACCTTTTCTCAGTGTCCGGAAAATCGAGTCGCGAAAACTGAAAGAATTCATTCCAAACCTTTTCGCTATGCCTATAAGGTAACCGCGAGTATACGGCTCATACCTAAACATGCCAGGCGATCTATACACCGATTCTTTTTTGTCCCCGTACTTGCTTGCGAGTGGTTGGACAGTTACTATCGACGCAATAGGTTGTACACCTGATATTTTGGTCTCAAATCAAGCAAGACGACCCGCTGAACTTAA	JX905535	SH200054.06FU			Flagellate	Fungi	Chytridiomycota					DQ309166	uncultured_fungus
GL04960	ID1YYUI01DC22S	CTAGACTCGTCATCGATGAAGAACACAGCGAAATGCGATAAGTAGTGTGAATTGCAGAATTCAGTGAATCATCGAATCTTTGAACGCATATTGCGCTTCCTGGTATTCCGGGGAGCATGCTCGTTTCAGAATCATTAAAAAACTCACATAGCTGTTTCTTGCCTGTCAAGTGCAGCACGTGTGAATTTGAGCGCTTTGTCCAGGCCTCTTTCGAGGGCAGGACAATCGCTTTGAAATGATTGTGCGTAGGGCAGTGACTACCGTCCGCTCGACTCTCAGTGCAACAGATCATTGAAACACTTTGAGTCTTGGGACGCGAAATAGCTGCATTGCGCCTTCCAGTTTAACACGGTGCCTGCTCGTAATTTTTGCGAGTGGCTCCGACAACTTGGTCTGAAA…	AM999625	SH237611.06FU			Flagellate	Fungi	Chytridiomycota					AM999621	uncultured_fungus
GL06723	IJOVCJS01CP1RO	CTAAGACTCGTCATCGATGAAGAACGTGGCGAAATGCGATAAGTAGTGTGAATTGCAGAATTCAGTGAATCATCGGATCTTTGAACGCACATTGCGCTTCCTGGTATTCCGGGGAGCATGCTCGTTTCAGAATCATTAAAAACTCACGCTCTTTGGTTTGCTCACACACTGTGACAGGCTATTAGATGCGTGGATGTGAGCGTTTTTGGCTACAGTCAGCATCGCTTTAAAATGATTATGTACGCAACCCTTGCCTTTGGCGGGCTGCCAACAGTGCGACAATGTTTTTAACATGTTCATTTTTGGCTGCTGCGGAAGGCTGGCGCGTGTAACTCTACTCCAACACAAAACGTATGGCATACGCCTATGCTTTGAAACTTGGTCTGAAATCGAGCAAGA…	AY349100	SH206807.06FU			Flagellate	Fungi	Chytridiomycota					EU516769	uncultured_fungus
GL06757	ID03IXK02I70PB	CTAGACTCGTCAACGATGAAGAACGCAGCGAAATGCGATAAGTAGTGTGAATTGCAGAATTCAGTGAATCATCGAATCTTTGAACGCACATTGCGCTTCCTGGTATTCCGGGGAGCATGCTCGTTTCAGAATCATTTAAATCTCACAATCCGGATGTGCCCTCGGGCATATCTTGGAGAGTGGATGTGTGCGATCTTGCCTTTTTCATTTCGATGGGAAGGGCAATCGCTTCAAAATGATTGTGTGTGTACGTCGATTTACAGCAATCGGTTCAAACTCAGTGCAACAGATAATGGAACACTTTGTTTGGCTGACTGCGTATCCGGCATGCGCGCCATCTTCCTGTAACAGGGCTGAATGCAAGTCTTGCAATCAGCTTTGAAACTTGGTCTGAAATCG…	FJ827711	SH241522.06FU			Flagellate	Fungi	Chytridiomycota					EU516986	uncultured_Spizellomyces
GL09429	ID03IXK02HLDDO	CTAACTCGTCAACGATGAAGAACGCAGCGAAATGCGATAAGTAGTGTGAATTGCAGAATTCAGTGAATCATCGAATCTTTGAACGCACATTGCGCTTCCTGGTATTCCGGGGAGCATGCTCGTTTCAGAATCATTAAAAACTCATAAACTCTGCCAAACTGTGTCTGGCCGAGGGCGTGGATGTGGGCGTTTTGATCTCAATATGCTGACTTGAGAAAATCGCCTTAAAATGATTTTGTACACATCACCTTGCCCACATTGTGAGTTATCAACAGTGCGACAGTATTTTGTTCACTTCTGGTATGCTTCTTGTGTGAGTCGGGTGAACCGTACATCAAATTTACACATTGCTAGCTTTGCTAGCTTTGAAACTTGGTCTGAAATCGAGCAAGAAAACCC…	AY997075	SH190244.06FU			Flagellate	Fungi	Chytridiomycota					EU516769	uncultured_fungus
GL14892	IGJRWKL02FM3QL	TGCAGAATTCAGTGAATCATCGAATCTTTGAACGCACATTGCGCCCTCTGGTATTCCGGAGAGCATGCCCGTTTCAGAATCATTAAAAATCTCACATTGGAATGTGGATGTGGATGTTTTGTGCTTACGGACAATCATCTCAAAATGATAGTATGTGCGCCGACAAATCAAGAAGTTGATCGGTACCAAAGTGCAACAGATTTGCGTCTATTACTCTTTGGCCAATTGCTTTGCGATTGAATGGTGCATGTTCCCAACCTATTATACAATGGTCATGTTGTTTTGACATGGCTGTTGATAACTTGGTCTGAAATTTTCGGGCAAGAAAACCCGACTGAACTTAA	JN943813	SH236557.06FU			Flagellate	Fungi	Chytridiomycota					EU516769	uncultured_fungus
GL03932	ID1YYUI01A55PP	ACGTATCTAGACTCGTCATCGATGAAGAACGTAGCGAAATGCGATACGTAATGTGAATTGCAGAATTCAGTGAATCATCGAATCTTTGAACGCATATTGCGCTCTCTGGTATTCCGGAGAGCATGCTTGTTTGAGTATCAGTAAACACCCCTCAGAACTTTTTGATTTTCGAATCTTGAAGCTCTGGATTTGAGTGATCCCAACGCGTTCTTTCGCAGAACATGGCGGGCCACTTGAAATGCAGGTGCAGCTGGACTTTCTTCTGAGCTAAAAGCATATTTATTTAGTCCTGTCAACACTTGTGTTGCGGATTATTACTTCTGCTGCAGCTAACATAAAGGTTGATTGTTCAAATGCTGACTGATGCAGGATTTATCAGTAGCGCAAGCTATCTGTTAA…	GU366719	SH202060.06FU		Saprotroph		Fungi	Mortierellomycota	Mortierellomycetes	Mortierellales	Mortierellaceae	Mortierella	GU366719	uncultured_fungus
GL04232	ID1YYUI01BC29N	CTAGACTCGACATCGATGAAGAACGCAGCGAAATGCGATACGTAATGTGAATTGCAGAATTCAGTGAATCATCGAATCTTTGAACGCACATCGCGCTCTCTGGTATTCCGGAGAGCATGCTTGTTTGAGTATCAGTAAACACCCTCAGTTCCTATTCTCTTTTGAGAGTTAGGGAACTGGACTTGAGCAGTCCCAACGTCAGAAGACTTGTTCTACTGTCGGCGGGTTGCTTAAAATGCAGGTGCGGCAGGACACATCTTCTGAGCTAAAAGCATTACTTATTTAGTCCCGTCAGACGGACTATTACTATTGCTGCAGCTAAGATATTAAAGGTCGATTGTCCTTATTGCCCGACTGATGCAGGAATTGTCAGAGGACTCTTTGTCCTCTGTTCAACTC…	AF133789	SH206386.06FU		Saprotroph		Fungi	Mortierellomycota	Mortierellomycetes	Mortierellales	Mortierellaceae	Mortierella	JQ313018	uncultured_fungus
GL07810	IGJRWKL02GS02V	CTAGACTCGTCACCGATGAAGAACGCAGCGAAATGCGATACGTAATGTGAATTGCAGAATTCAGTGAATCATCGAATCTTTGAACGCACATTGCACTCTCTGGTATTCCGGAGAGTATGCTTGTTTGAGTATCTGTAAACATCTCAACCCTCAAGGCGCTTGCGTCGGGAGGATTGGACTTGAGCGATCCCGACTCTTTCGTGAGGAAGAGGAGGGTCGCTTGAAATGCAGGTGCAGCAGGACATTCTTCTGAGCTAAAAGCATATCTATTTAGTCCCGTCAAACGGATTATTACTTTTGCTTCAGCTAACATAAAGGTCGAATGCGCCACAATCGCTGATTGCAGGAAAACTCGTTCGTAAGAACTTGTGAACTCGATCTCAAATCAAGTAAGACTAC…	EU877751	SH217228.06FU		Saprotroph		Fungi	Mortierellomycota	Mortierellomycetes	Mortierellales	Mortierellaceae	Mortierella	FJ456969	uncultured_fungus|Mortierella|
GL18226	ID03IXK02HBLX2	TGGACCTGAGCAATCCCAACATTTTTTTCTTAAAGTGGCGGGTTGCTTGAAATGCAGGTGCAGCTGGACATTCTCCTGAGCTAAAAGCATATTCATTTAGTCCCGTCAAACGGATTATTACTTTTGCTGCAGCTAATATAAAGGGAGTTTGACCATTTTGGCTGACTGATGCAGGAATTTCACAGGAGTCTTCAAACCACTCTTGTTAAACTCGATCTCAAATCAAGTAAGACTACCCGCTGAACTTAA	JX898561	SH228356.06FU		Saprotroph		Fungi	Mortierellomycota	Mortierellomycetes	Mortierellales	Mortierellaceae	Mortierella	JX270424	Mortierella_sp_09CT01
GL24720	ID1YYUI01CJ0VV	CTATCCCAACAACCTTCACCGGTAGGCGGGCGGCTTGAAATGCAGGTGCAGCTGGACTTTTATCTGAGCTAAAAGACATATCTATTTAGTCCTCGTCAAACAGGATTATTACTATTGCTGCAGCTAACATAAAGGATAATTGTCCTCATTGCTGACTGATGCAGGATTTTACGTACACTTTATTGTGTTGTTCAACTACGATCTCAAATACAAGTAAAGACTACCCGCTGAACTTAAA	EF031115	SH218045.06FU		Saprotroph		Fungi	Mortierellomycota	Mortierellomycetes	Mortierellales	Mortierellaceae	Mortierella	JX316418	uncultured_fungus
GL24960	IJOVCJS01C1JA5	CAATCCCAACTCCTTCGTCAGAAAGAGGAGGGTTGCTTGAAATGCAGGTGCAGCTGGGCATTCTTCTGAGCTAAAAAGCATATTTATTTAGTCCCGTCAAACGGATTATTATTCTTGCTTCAGCTTACATAAAGGTTGAATGACTACCGAGGCTGATTGCAGGTAAAACTCGTTCCGTTAAAAAAGAACTTGTGAACTCGATCTCAAATCAAGTAAGACTACCCGCTGAACTTAA	JF300715	SH217218.06FU		Saprotroph		Fungi	Mortierellomycota	Mortierellomycetes	Mortierellales	Mortierellaceae	Mortierella	JF300716	uncultured_fungus
GL07769	IJOVCJS01DRF47	CTAGACTCGTCATCGATGAAGAACGTAGCGAAATGCGATACGTAATGTGAATTGCAGAATTCAGTGAATCATCGAATCTTTGAACGCACATTGCGCTCTCTGGTATTCCGGAGAGCATGCTTGTTTGAGTATCAGTAAAACACCCTCAGTTCTCTTTATGAGAATTGGACTTGAGTGATCCCAACGGCGGTTTCCGAACCACTGGCGGGTCACTTGAAATGCAGGTGCGGCTGGACACATCTTCTGAGCTATAAGCATTACTTATTTAGTCCCGTCAGACGGATTATTTCTACTGCTACAGCTAATATAAAGGTCGATTGTCCGTTTGCCCGACTGATGCAGAAAAAACAAAGAGAGATCTTTGTTCACTCGATCTCAAATCAAGTAAGACTACCCGCT…	AB521986	SH233133.06FU		Saprotroph		Fungi	Mortierellomycota	Mortierellomycetes	Mortierellales			AB521986	uncultured_fungus
GL08672	IGJRWKL02G3MI7	TCAACTTCCTTTTCTTTTTGAAAAGGAGTTGGACTTGAGCAATCCCAACGTCGATGTCATTCGTGACAGTGTCGGCGGGTTGCTTGAAATGCAGGCGCAGCTGGACTTTCTTCTGAGCTAAAAGCATATCTATTTAGTCCCGTCAAACGGATTATTACTTTTGCTGCAGCTAATATAAAGGTTGATTGTCCTTGTGCTGACTGATGCAGGAATTTTTCGGATTGCAAAATCTGTTAAACTCGATCTCAAATCAAGTAAGACTACCCGCTGAACTTAA	KC008912	SH214833.06FU		Saprotroph		Fungi	Mortierellomycota	Mortierellomycetes	Mortierellales			JN104514	Mortierella_sp_CZ_2011
GL09642	ID1YYUI01BGK83	TTTCTTGAGACTTGGATTTGAGTGGTCCTAATAACGAGTCCCTTTAAAAAAGGACAAGTAGGCAGGTTACTTGAAATTCAGGTGCAGCTGAACTTTTCTTCTGAGCTAAAAGCATTATTTATTTAGTCTTTATTGACTATTACTTTTTTTGCTGCAGCTAATATAAAGGAAGAGAAGCTTCATTATGGCTGACTGATGCAGGAATTTATCAGTCTGGTAAAAAGGACTGTTAGACTCGATCTCAAATCAAGTAAGACTACCCGCTGAACTTAA	JF926966	SH237423.06FU		Saprotroph		Fungi	Mortierellomycota	Mortierellomycetes	Mortierellales			GU055618	uncultured_Mortierellaceae
GL12369	ID03IXK02IPOME	TTAAAAGTTTTGGACTTGAGCAATCCCAACACCAGTCTTTTTTAGATCGGTGGCGGGTTGCTTGAAATGCAGGTGCAGCTGGACATTCTTCTGAGCTAAAAGCATATTTATTTAGTCCCGTCAAACGGATTATTACTTTTGCTGCAGCTAATATAAAGGGAGTTTGACCGTATTGGCTGACTGATGCAGGATTTCACAAGGGTCGGCAACGATTCTTGTAAAACTCGATCTCAAATCAAGTAAGACTACCCGCTGAACTTAA	JX675197	SH214836.06FU		Saprotroph		Fungi	Mortierellomycota	Mortierellomycetes	Mortierellales			EU917086	uncultured_fungus
GL49523	ID03IXK02HKAPE	CTAGACTCGTCAACGATGAAGAACGCAGCGAAATGCGATAAGTAATGTGAATTGCAGAATTCAGTGAATCATCGAATCTTTGAACGCACATTGCGCCCCTTGGTATTCCGAGGGGCATGCCTGTTCGAGCGTCATTATGACCAATCAAGCCTGGCTTGGTGTTGGGGTTCGCGGTCTCGCGGCCCTTAAAATCAGTGGCGGTGCCGCCCGGCTCTAAGCGTAGTAACTTTCTCGCTATGGTGTCCGGGTAGTTTACCTGCCAGAATCCCCCATCTCACGGTTGACCTCGGATCAGGTAGGGATACCCGCTGAACTTAA	HQ211991	sequence missing from global key		Saprotroph		Fungi	Mortierellomycota	Mortierellomycetes	Mortierellales			HQ212180	uncultured_sordariomyceta
GL06476	ID03IXK02HI4T0	AAAAGGGGAGCTGGACTTGAGTGATCCCAACGGCAGTGATTTTTTAAACCGCTGCTGGCGGGTCGCTTGAAATGCAGGTGCGGCTGGACACATCTTCTGAGCTATAAGCATTACTTATTTAGTCCCGTCAAGCGGATTATTTCTATTGCTGCAGCTAACATAAAGGTCGATTGTCCTTGTGCCCGACTGATGCAGGAAGACAAAAAGAAAGTCTGCGTCTCTGACGGAGGTCCTCTCTCTCTTTGTTCAACTCGATCTCAAATCAAGCAAGACTACCCGCTGAACTTAA	AF133789	SH206386.06FU		Saprotroph		Fungi	Mortierellomycota	Mortierellomycetes				EU917129	uncultured_fungus
GL31182	IJOVCJS01ALMZH	CTAGACTCGTCAACGATGAAGAACGCAGCAAAGTGCGATAACTAGTGTGAATTGCATATTCAGTGAATCATCGAGTCTTTGAACGCAACTTGCGCTCAATGGTATTCCATTGAGCACGCCTGTTTCAGTATCAAAAACACCCCACATTCATAATTTTATTGTGAATGGAATTGAGAATTTCGACTTGTTTGAATTCTTTAAACCTATTAGGCCTGAACTATTGTTCTTTCTGCCTGAACATTTTTTTAATATAAAGGAATGCTCTAGTATTAAGACTATCTCTGGGGCCTCCCAAATAAAACTTTCTTAAATTTGATCTGAAATCAGGCGGGATTACCCGCTGAACTTAA	HM589303	SH202366.06FU		Saprotroph		Fungi	Mucoromycota	Mucoromycetes	Mucorales	Mucoraceae	Mucor	HM439524	fungal_sp_712_YZ_2011
GL22914	ID03IXK02H1JMB	CTACTCGTCAACGATGAAGAACGCAGCGAAATGCGATACGTAATGTGAATTGCAGAATTCAGTGAATCATCGAATCTTTGAACGCACATTGCACTCCTTGGTATTCCGAGGAGTATGCCTGTTTCAGTATCATGAGCACTCTCACACCTAACCTTTGGGTTTTGTTGTGGAATTGGGATGCGCCGACTGTCACGGTTGGCCCTTCTAAAATGTAGTTCTTGGCTGTCACCTAATACAGCAGTTTGGCCTAATAGTTTTGGCATTCATTGTCAAATCTTTGGCTAACATTTGCTCCAGGAGTCAGTCTTGATAATACAGAAAACTCATTCAAATTTTGATCTGAAATCAGGTAGGGCTACCCGCTGAACTTAA	EU076939	SH219309.06FU		Saprotroph		Fungi	Mucoromycota	Mucoromycetes	Umbelopsidales	Umbelopsidaceae	Umbelopsis	KC180750	Mortierella_sp_GMU_LL_01_G3
GL23918	ID03IXK02IEAUU	CTAGACTCGTCAACGATGAAGAACGCAGCGAAATGCGATACGTAATGTGAATTGCAGAATTCAGTGAATCATCGAATCTTTGAACGCACATTGCACTCCTTGGTATTCCGAGGAGTATGCCTGTTTCAGTATCATGAGCACTCTCACACCTAACCTTTGGGTTTTGTTGTGGAATTGGGATGCGCCGATTTCAATAGTCGGCACTCCTAAAATGTAGTTCTTGGCTGTCACCTAATACAGCAGTTTGGCCTAATAGTTTTGGCATTCATTGTCAAATCTTTGGCTAACATTTGCTCCAGGAGTCAGTCTTGATAATACAGAAAACTCATTCAAATTTTGATCTGAAATCAGGTAGGGCTACCCGCTGAACTTAA	EU076939	SH219309.06FU		Saprotroph		Fungi	Mucoromycota	Mucoromycetes	Umbelopsidales	Umbelopsidaceae	Umbelopsis	KC180750	Mortierella_sp_GMU_LL_01_G3
GL32203	ID1YYUI02HFHFY	GGTTTATTGGCGTGGAATTGGAATGCGCCGACTGTCAGGGTTGGCCCTTCTAAAATGTAGTTCTTGGCTGTCACCTAATACAGCAGTTTGGCCTAATAGTTTTGGCATTCATTGTCAAATCTTTGGCTAACATTTGCTCCAGGAGTCAGTCTTGATAATACAGAAAACTCATTCAAATTTTGATCTGAAATCAGGTAGGGCTACCCGCTGAACTTAA	EU076939	SH219309.06FU		Saprotroph		Fungi	Mucoromycota	Mucoromycetes	Umbelopsidales	Umbelopsidaceae	Umbelopsis	KC180750	Mortierella_sp_GMU_LL_01_G3
GL01896	ID1YYUI01DBH3F	TGTGCCTTGAGAGACGCCGTTTTACCACACCTAGTATCGTCATCGATGAAGAACGCTGCGAAATGCGATACGTAATGTGAATTGCAGAATTCAGTGAATCATCGAATCTTTGAACGCACATTGCACTCCTTGGTATTCCGAGGAGTATGCCTGTTTCAGTATCATGAGCACTCTCACACCTAACCTTTGGGTTTATGGCGTGGAATTGGAATGCGCCGACTGTCATGGTTGGCCCTTCTAAAATGTAGTTCTTGGCTGTCACCTAATACAGCAGTTTGGCCTAATAGTTTTGGCATTCATTGTCAAATCTTTGGCTAACATTTGCTCCAGGAGTCAGTCTTGATAATACAGAAAACTCATTCAAATTTTGATCTGAAATCAGGTAGGGCTACCCGCTGA…	EU076939	SH219309.06FU		Saprotroph		Fungi	Mucoromycota	Mucoromycetes	Umbelopsidales	Umbelopsidaceae	Umbelopsis	KC180750	Mortierella_sp_GMU_LL_01_G3
GL29398	ID03IXK02JEZB1	CTTGGAATGCGCTGATGTCAATCAGCCCTTCTAAAATGGAGTTCTTGCACTGTTGATTTGTTTTAACAGCATGTTGGCCTAATAAGTTTCGGCAGTAATGTTGAAATCACTGGCTTTTCTTGCTTAGAATCTGACAGTCTTGATATACAGTAATTTTTGAGGTGACTTGTCTCCTCTTCTAAATTTTGATCTGAAATCAGGTAGGATTACCCGCTGAACTTAA	KC816003	SH205578.06FU		Saprotroph		Fungi	Mucoromycota	Mucoromycetes	Umbelopsidales	Umbelopsidaceae	Umbelopsis	JN198475	Umbelopsis_ramanniana
GL32206	ID1YYUI02IR63U	TTATGTCGTGGAATTGGGATGCGCCGATTTTTATTAGTCGGCACTCCTAAAATGTAGCTCTTGGCTGTTTCCTACTACAGCAGTTTGGCCTAATAGTTTTGACTTTTTGTCAAATCTTTGGTCTACATTTGTCTTCTGGAAATCAGTCTTGATAATACAGAAAACTACATTTCAAACTTTAGATCTGAAATCAGGTAGGGCTACCCGCTGAACTTAA	HQ608128	SH209700.06FU		Saprotroph		Fungi	Mucoromycota	Mucoromycetes	Umbelopsidales	Umbelopsidaceae	Umbelopsis	EU977237	fungal_endophyte_sp_P1406O
GL06444	ID1YYUI01C683F	GAAATGCGAAAAGTAATGCGATTTGCATGAATCTGTGAGTCATCAAGTCTTTGAACGCACTTTGCACCGTATGAGCAATCGTACGGTATACCTGTTTGAGAATCGTAAAACTCTCTCTCCACCAGTTGGTGGGGATGGATTTGTCGGTTGTGCGAGCCTTGTGCTCGTACTCTGATCAAAAGTAGTAGGTTTGGATCAGGCTAGTGGCCTGGGACATTGTGTGCTAGAGACGCTGCTTTAATTAGTTAGTCTTCTCACAATGCGTCCTGGGCCCTTTGAAAGCTAGCTCTGATTGGCGACCTCTTCAGTGAACTGGGTGCAAACCCGGGACACAACCCCCCTTTTTGATCTCAAATCAGGTAAGGCTACCCGCTGAACTTAA	HM240210	SH217991.06FU				Fungi	Rozellida					EU516826	uncultured_fungus
GL27707	IGJRWKL02FZ1QA	CTAGACTCGTCACCGATGAAGAACGCAGCAAAGTGCGAAAAGTGTTGCGATTTGCACGAATCTGTGAGTCATCTAATTTTTGAACGCGAATGGCACTGTTACGTAAGTAGCAGTATGTCTGTTTGAGAATCGCAAAACAAGATCAACTCTAGTTGAGAGTTGGGATTGACCTTATGTGCCTTTGGGTACATTTGGTTTAAATAAATCGAGTTGATGAGCTTCCCAATACGGCTCAATGTGTGCTAGCGAGACAGTCGTCCCGATCTCACATTTCGGCCGTGTTGCAGAGTTCTGACCACAATTCGCTAAACTCATAAATCAAATACGATCTCAAATCAGGCAAGATTACCCGCTGAACTTAA	JF519527	SH230153.06FU				Fungi	Rozellida					GU187883	uncultured_fungus
GL50240	ID1YYUI01D240E	TCTAGACTCGTCACCGATGAAGAACGCAGTAAAGTGCGATATGTAGTGCGATTTGCATGAATCTGTGAGTCATCTAATCTTTGAACGCAACTTGCGCCTTTTACGAGGCATGTTTGTTTGAGTGCCGCAATCCTCTGCAGCAATGCGATTTGACTCGTGTCTTTGTTGACCGAGTTTAAACAGAGCTAGAGGATGGTCAGTTTGACCTAGTCCGAGTGCTAAGCATTCTTGGGCCTAGGCTGGATTGATCATTAAATCTATCTTTATTTTTGGCCTCAAATCAAGCAAGACTACCCGCTGAACTTAA	KC966066	SH198482.06FU				Fungi	Rozellida					EF619906	uncultured_glomeromycete
GL01442	ID1YYUI01BO6LI	GAATTCAGTGAATCATCGAATCTTTGAACGCATATTGCGCTCCTCGGCATTCCGAGGAGCATGCCTGTTTGATGCACGCATGAAATCAACTTGTGTGCAAGATGTCACGTCTTGCCCGCATAGTTGCTTCTGAGCTTTTCTCACATCTGTGAGTAGTTCTAAGATCGTGTCATCACAGAATTTGAGGGGTAGCAGCGACTTTGGGAGACGGCTCCATTTACTTGGGTCAGCCGACGCCGATTGCATTTACGCCCACTCCGAAGTGATAATATTGAGTTCAATTTTTGAACACTCTTTGTTACGCGGATTGGTCGCCATCGAGCGCCGTTGGACATCAGGTTGGAACAGTCGAGCAAGTTGAACGCATCCCAGTGAAGCTAATGTATTTTAGCATCGTCA…	AF324170	SH241555.06FU				Fungi						JX915575	uncultured_fungus
GL05750	IGJRWKL02GLDYI	AGGGGTCGCTCTCTTTTGGTCTGGTTCAAACACTTTGTTTGGCTGAGTTCGAAAGTGCTATTTAAACAACTCCTAAAGTGAACATACGAATTGGGACGGAAGACCTCGGCAATGGTTGTTTCGACATCCATACGGGCGACGGCCATCTTCTTTGTCACATGTAGGAGTTGGGCATTTTCGAAATCTTGGCCCGAAGAATTGAACTTTTTCAAAAGGGTGTTTGCATCTCGATGGATCCAGTTTGGATTCTCCACAAAACGCATCAAATCAGGTAGGGTTACCCGCTGAACTTAA		no best match accno				Fungi						AY969573	uncultured_Basidiomycota
GL10270	ID1YYUI01CXCRD	TCGTGTGCCTTGGAGACGCCGACCACACCTAGTATCTAGACTCGTCATCGATGAAGAACGCAGCGAAACGCGATAGGTAATGTGAATTGCAGAATTCCGTGAATCATCGAATCTTTGAACGCACCTTGCGCTCCATGGCATTCCGTGGAGCATGCCTGTTTGAGTGCCGCGAAATCTCCCACCCCTAGCGGTTGCCGCAAGGCGCCGCCGGGCGGCGGGGTTGGTTGGGTGCCGCTGCCTGGGCTTTGGCCCAGGCTCGCCCGAAATGCATGAGCGCTTAGCACTCGCACCGTCTCGAGGGAAGGCGGCGGAGCTGGCATCTGCGCATGGCATGATACGTCATTTGCTGTGTGGCAGCCCAGCGACCCGAGAGTGTGTGTGCGCTACTACACGCCCTTT…	JX042766	SH219325.06FU				Fungi						JX317381	uncultured_soil_fungus
GL26705	ID1YYUI01AZL9W	CTAGACTCGTCACCGATGAAGAACGCAGCGAAATGCGATACGTAATGTGAATTGCAGAATTTGTGAATCATCGAATCTTTGAACGCACATTGCGCTCTCTGGTATTCCGGAGAGCATGCCTGTTTGAGCGTCATTAAAATCTCTCAATCATTTATTGAATGTTTATTCGTTTGTGAGTGGTTGGTGTTGGACAGTTTGCTGCAGACGGTCGAGAGACTTGTGTGTGCTTGTCTGAAAGATATTGCAAAGAAAACGTAATAAGAAATTTACAATCGTTTGCTCCTTTGCAGTGAAACCATGTTCCTCTTCGGAGGGACAGCTTCTAATTTTGACCTCAAATCAGGTAGGACTACGCGCTGAACTTAA	GU328604	SH190415.06FU				Fungi						EU689231	uncultured_soil_fungus
GL30055	ID1YYUI01B9SZ2	TTTTGTTTTGTTTATTCGAAACAATTGCTTTGAAAACATAGTGTGTGCCGTGACGACAGTCCGTTCAACTCTCAGTGCAACAAATTTTTGAAACACTGAAAGATTGGATCGGGAGGAAATCGCTGGTTGCCCACCCCCTTGCAACACAAAACAGGCTGTAGTTACTGCGCCTGTTTTGATAACTTGGTCTGAAATCGAGCAAGAAAACCCGCTGAACTTAA	AM999617	SH233661.06FU				Fungi						AM999740	uncultured_fungus
Panel B
OTUid	Reads, boreal culture-free NGS	Reads, boreal cultures	Reads, temperate cultures	Total reads per OTU_	Overlap details	Confidence	Kingdom	Phylum	Class	Order	Family	Genus	Species
OTU_2782	0	5	44	49	Boreal (cultures) and Temperate (cultures)	0.9	Fungi	Ascomycota	Sordariomycetes	Xylariales	Xylariaceae	Nemania	Nemania sp JDCH1
OTU_6127	0	1	7	8	Boreal (cultures) and Temperate (cultures)	1	Fungi	Ascomycota	Pezizomycetes	Pezizales	Sarcosomataceae	Galiella	Galiella sp
OTU_7059	0	2	4	6	Boreal (cultures) and Temperate (cultures)	0.97	Fungi	Ascomycota	Pezizomycetes	Pezizales
OTU_7157	0	2	1	3	Boreal (cultures) and Temperate (cultures)	0.97	Fungi	Ascomycota
OTU_9449	0	49	5	54	Boreal (cultures) and Temperate (cultures)	0.83	Fungi	Ascomycota	Sordariomycetes	Xylariales	Xylariaceae	Nemania	Nemania sp
OTU_9525	0	2	10	12	Boreal (cultures) and Temperate (cultures)	1	Fungi	Ascomycota	Pezizomycetes	Pezizales	Chorioactidaceae	Desmazierella
OTU_9557	0	6	2	8	Boreal (cultures) and Temperate (cultures)	0.91	Fungi	Ascomycota	Sordariomycetes	Xylariales	Xylariaceae	Xylaria
OTU_1091	939	28	1	968	Boreal (NGS and cultures) and Temperate (cultures)	0.87	Fungi	Ascomycota	Sordariomycetes	Diaporthales	Diaporthaceae	Diaporthe
OTU_113	15034	12	3	15049	Boreal (NGS and cultures) and Temperate (cultures)	1	Fungi	Ascomycota	Sordariomycetes	Hypocreales	Hypocreaceae
OTU_1177	1375	12	4	1391	Boreal (NGS and cultures) and Temperate (cultures)	0.98	Fungi	Ascomycota	Pezizomycetes	Pezizales
OTU_1197	10171	17	2	10190	Boreal (NGS and cultures) and Temperate (cultures)	0.99	Fungi	Ascomycota	Pezizomycetes	Pezizales	Sarcosomataceae	Pseudoplectania
OTU_1243	76	26	19	121	Boreal (NGS and cultures) and Temperate (cultures)	0.93	Fungi	Ascomycota	Eurotiomycetes	Eurotiales	Trichocomaceae	Aspergillus	Aspergillus piperis
OTU_13	91149	17	7	91173	Boreal (NGS and cultures) and Temperate (cultures)	0.85	Fungi	Ascomycota	Dothideomycetes	Pleosporales	Incertae sedis	Phoma	Phoma sp UASWS0872
OTU_135	26373	3	2	26378	Boreal (NGS and cultures) and Temperate (cultures)	0.89	Fungi	Ascomycota	Sordariomycetes	Hypocreales	Nectriaceae	Fusarium	Fusarium tricinctum
OTU_1416	3426	3	6	3435	Boreal (NGS and cultures) and Temperate (cultures)	1	Fungi	Ascomycota	Dothideomycetes	Pleosporales	Montagnulaceae
OTU_1561	722	1	16	739	Boreal (NGS and cultures) and Temperate (cultures)	1	Fungi	Ascomycota	Eurotiomycetes	Eurotiales	Trichocomaceae	Penicillium	Penicillium penicillioides
OTU_161	11151	22	26	11199	Boreal (NGS and cultures) and Temperate (cultures)	1	Fungi	Ascomycota	Leotiomycetes	Helotiales	Hemiphacidiaceae	Fabrella	Fabrella sp
OTU_1617	611	5	9	625	Boreal (NGS and cultures) and Temperate (cultures)	0.93	Fungi	Ascomycota	Sordariomycetes	Coniochaetales	Coniochaetaceae
OTU_1625	65	13	137	215	Boreal (NGS and cultures) and Temperate (cultures)	0.99	Fungi	Ascomycota	Sordariomycetes	Xylariales	Xylariaceae
OTU_1759	228	1	3	232	Boreal (NGS and cultures) and Temperate (cultures)	0.87	Fungi	Ascomycota	Pezizomycetes	Pezizales	Pyronemataceae
OTU_1806	468	1	14	483	Boreal (NGS and cultures) and Temperate (cultures)	0.81	Fungi	Ascomycota	Dothideomycetes	Pleosporales	Montagnulaceae
OTU_182	19	13	16	48	Boreal (NGS and cultures) and Temperate (cultures)	0.85	Fungi	Ascomycota	Pezizomycetes	Pezizales	Pyronemataceae	unidentified	Pyronemataceae sp
OTU_1885	302	32	2	336	Boreal (NGS and cultures) and Temperate (cultures)	0.91	Fungi	Ascomycota	Sordariomycetes	Xylariales	Xylariaceae	Xylaria
OTU_196	8972	1	9	8982	Boreal (NGS and cultures) and Temperate (cultures)	1	Fungi	Ascomycota	Eurotiomycetes	Chaetothyriales	Herpotrichiellaceae	Phaeomoniella	Phaeomoniella sp
OTU_1962	96	3	2	101	Boreal (NGS and cultures) and Temperate (cultures)	1	Fungi	Ascomycota	Sordariomycetes	Sordariales	Lasiosphaeriaceae	Podospora	Podospora glutinans
OTU_1989	32	1	238	271	Boreal (NGS and cultures) and Temperate (cultures)	0.98	Fungi	Ascomycota	Sordariomycetes	Xylariales	Xylariaceae	Xylaria
OTU_2033	52	10	2	64	Boreal (NGS and cultures) and Temperate (cultures)	0.96	Fungi	Ascomycota	Pezizomycetes	Pezizales
OTU_2041	633	160	16	809	Boreal (NGS and cultures) and Temperate (cultures)	0.85	Fungi	Ascomycota	Dothideomycetes	Pleosporales	Incertae sedis	Periconia	Periconia sp LVPEIH4157_10
OTU_2277	3076	1	110	3187	Boreal (NGS and cultures) and Temperate (cultures)	0.91	Fungi	Ascomycota	Leotiomycetes	Rhytismatales	Rhytismataceae	Lophodermium	Lophodermium conigenum
OTU_2483	142	3	32	177	Boreal (NGS and cultures) and Temperate (cultures)	0.92	Fungi	Ascomycota	Sordariomycetes	Xylariales	Xylariaceae	Nodulisporium	Nodulisporium sp
OTU_250	11872	2	2	11876	Boreal (NGS and cultures) and Temperate (cultures)	0.82	Fungi	Ascomycota	Sordariomycetes	Xylariales	Amphisphaeriaceae	Adisciso	Adisciso kaki
OTU_2757	91	19	2	112	Boreal (NGS and cultures) and Temperate (cultures)	0.99	Fungi	Ascomycota
OTU_2781	113	16	1	130	Boreal (NGS and cultures) and Temperate (cultures)	1	Fungi
OTU_2920	3	20	85	108	Boreal (NGS and cultures) and Temperate (cultures)	0.84	Fungi	Ascomycota	Sordariomycetes	Xylariales	Xylariaceae	Nemania
OTU_2980	64	32	1	97	Boreal (NGS and cultures) and Temperate (cultures)	1	Fungi	Ascomycota	Sordariomycetes	Xylariales	Xylariaceae
OTU_3161	179	6	5	190	Boreal (NGS and cultures) and Temperate (cultures)	1	Fungi	Ascomycota	Sordariomycetes	Xylariales	Xylariaceae	Daldinia
OTU_3287	6	54	14	74	Boreal (NGS and cultures) and Temperate (cultures)	0.94	Fungi	Ascomycota	Sordariomycetes	Xylariales	Xylariaceae
OTU_3375	98	2	1	101	Boreal (NGS and cultures) and Temperate (cultures)	1	Fungi	Ascomycota	Sordariomycetes	Xylariales	Xylariaceae	Hypoxylon	Hypoxylon submonticulosum
OTU_3384	23	13	1	37	Boreal (NGS and cultures) and Temperate (cultures)	1	Fungi	Ascomycota	Sordariomycetes	Xylariales	Xylariaceae	Kretzschmaria	Kretzschmaria sp
OTU_3482	100	1	5	106	Boreal (NGS and cultures) and Temperate (cultures)	0.98	Fungi	Ascomycota	Pezizomycetes	Pezizales	Pyronemataceae	Geopyxis	Geopyxis sp
OTU_3805	12	23	8	43	Boreal (NGS and cultures) and Temperate (cultures)	0.98	Fungi	Ascomycota	Pezizomycetes	Pezizales	Discinaceae	Gyromitra	Gyromitra infula
OTU_382	4924	1	1	4926	Boreal (NGS and cultures) and Temperate (cultures)	0.95	Fungi	Ascomycota	Dothideomycetes	Pleosporales
OTU_3864	139	2	1	142	Boreal (NGS and cultures) and Temperate (cultures)	0.99	Fungi	Ascomycota	Sordariomycetes	Xylariales	Xylariaceae	Hypoxylon	Hypoxylon perforatum
OTU_401	66	21	2	89	Boreal (NGS and cultures) and Temperate (cultures)	1	Fungi	Ascomycota	Dothideomycetes	Pleosporales	Sporormiaceae	Preussia
OTU_4022	34	1	2	37	Boreal (NGS and cultures) and Temperate (cultures)	0.85	Fungi	Ascomycota
OTU_4137	956	1	1	958	Boreal (NGS and cultures) and Temperate (cultures)	0.93	Fungi	Ascomycota	Dothideomycetes	Capnodiales	Mycosphaerellaceae	Ramularia	Ramularia cynarae
OTU_461	3000	1	3	3004	Boreal (NGS and cultures) and Temperate (cultures)	0.99	Fungi	Ascomycota	Sordariomycetes	Hypocreales	Nectriaceae
OTU_49	29373	4	1	29378	Boreal (NGS and cultures) and Temperate (cultures)	0.82	Fungi	Ascomycota	Dothideomycetes	Dothideales
OTU_5041	15	2	3	20	Boreal (NGS and cultures) and Temperate (cultures)	0.96	Fungi	Ascomycota	Sordariomycetes	Boliniales	Boliniaceae	unidentified	Boliniaceae sp
OTU_5233	14	3	15	32	Boreal (NGS and cultures) and Temperate (cultures)	0.87	Fungi	Ascomycota	Sordariomycetes
OTU_5234	2	1	12	15	Boreal (NGS and cultures) and Temperate (cultures)	0.98	Fungi	Ascomycota	Sordariomycetes	Xylariales	Xylariaceae
OTU_5416	26	1	7	34	Boreal (NGS and cultures) and Temperate (cultures)	0.93	Fungi	Ascomycota	Sordariomycetes	Xylariales	Diatrypaceae	Diatrype	Valsa sp GCA_2012
OTU_571	792	13	2	807	Boreal (NGS and cultures) and Temperate (cultures)	1	Fungi
OTU_5718	4	6	3	13	Boreal (NGS and cultures) and Temperate (cultures)	0.94	Fungi	Ascomycota	Sordariomycetes	Coniochaetales	Coniochaetaceae
OTU_5783	11	1	1	13	Boreal (NGS and cultures) and Temperate (cultures)	0.86	Fungi	Ascomycota	Pezizomycetes	Pezizales	Sarcoscyphaceae	Pithya	Pithya vulgaris
OTU_63	17071	29	22	17122	Boreal (NGS and cultures) and Temperate (cultures)	1	Fungi	Ascomycota
OTU_685	988	250	46	1284	Boreal (NGS and cultures) and Temperate (cultures)	0.92	Fungi	Ascomycota	Sordariomycetes	Xylariales	Xylariaceae	Xylaria
OTU_726	831	1	2	834	Boreal (NGS and cultures) and Temperate (cultures)	0.8	Fungi	Ascomycota	Dothideomycetes	Pleosporales	Sporormiaceae	unidentified	Sporormiaceae sp
OTU_7881	4	1	13	18	Boreal (NGS and cultures) and Temperate (cultures)	0.98	Fungi	Ascomycota	Sordariomycetes	Xylariales	Xylariaceae	Virgaria	Virgaria sp
OTU_79	5527	5	1	5533	Boreal (NGS and cultures) and Temperate (cultures)	0.93	Fungi	Ascomycota	Dothideomycetes	Pleosporales	Sporormiaceae
OTU_82	38386	10	1	38397	Boreal (NGS and cultures) and Temperate (cultures)	1	Fungi	Ascomycota	Dothideomycetes	Capnodiales	Mycosphaerellaceae
OTU_8530	143	1	1	145	Boreal (NGS and cultures) and Temperate (cultures)	1	Fungi	Ascomycota	Dothideomycetes	Dothideales
OTU_902	2164	6	2	2172	Boreal (NGS and cultures) and Temperate (cultures)	0.92	Fungi	Ascomycota	Sordariomycetes	Diaporthales	Gnomoniaceae
OTU_1027	1616	0	2	1618	Boreal (NGS) and Temperate (cultures)	0.94	Fungi	Ascomycota	Sordariomycetes	Xylariales	Xylariaceae
OTU_1149	1024	0	9	1033	Boreal (NGS) and Temperate (cultures)	0.99	Fungi	Ascomycota	Sordariomycetes	Hypocreales	Nectriaceae	Fusarium	Fusarium sp OTU_011
OTU_1330	732	0	7	739	Boreal (NGS) and Temperate (cultures)	0.86	Fungi	Ascomycota	Sordariomycetes	Xylariales
OTU_1418	0	0	5	5	Boreal (NGS) and Temperate (cultures)	0.97	Fungi	Ascomycota	Dothideomycetes	Pleosporales	Sporormiaceae	Preussia
OTU_142	13878	0	1	13879	Boreal (NGS) and Temperate (cultures)	0.86	Fungi	Ascomycota	Leotiomycetes	Helotiales
OTU_147	15	0	2	17	Boreal (NGS) and Temperate (cultures)	0.84	Fungi	Ascomycota	Sordariomycetes	Hypocreales	Nectriaceae	Gibberella	Gibberella intricans
OTU_1479	707	0	67	774	Boreal (NGS) and Temperate (cultures)	0.98	Fungi	Ascomycota	Dothideomycetes	Capnodiales	Mycosphaerellaceae	Ramularia	Ramularia cynarae
OTU_1506	506	0	4	510	Boreal (NGS) and Temperate (cultures)	0.99	Fungi	Ascomycota	Dothideomycetes	Capnodiales	Mycosphaerellaceae
OTU_158	20650	0	1	20651	Boreal (NGS) and Temperate (cultures)	0.84	Fungi	Ascomycota	Dothideomycetes	Myriangiales
OTU_170	1103	0	9	1112	Boreal (NGS) and Temperate (cultures)	0.84	Fungi	Ascomycota	Sordariomycetes	Xylariales	Amphisphaeriaceae	Pestalotiopsis	Pestalotiopsis rhododendri
OTU_1744	389	0	1	390	Boreal (NGS) and Temperate (cultures)	1	Fungi	Ascomycota	Dothideomycetes	Capnodiales	Mycosphaerellaceae	Phaeothecoidea	Phaeothecoidea sp
OTU_1757	691	0	4	695	Boreal (NGS) and Temperate (cultures)	1	Fungi	Ascomycota	Dothideomycetes
OTU_1782	282	0	2	284	Boreal (NGS) and Temperate (cultures)	0.8	Fungi	Ascomycota	Eurotiomycetes	Chaetothyriales	Herpotrichiellaceae	Phaeomoniella
OTU_1920	537	0	2	539	Boreal (NGS) and Temperate (cultures)	0.98	Fungi	Ascomycota	Dothideomycetes	Botryosphaeriales	Botryosphaeriaceae
OTU_1988	217	0	1	218	Boreal (NGS) and Temperate (cultures)	1	Fungi	Ascomycota	Sordariomycetes	Hypocreales	Bionectriaceae
OTU_2043	272	0	1	273	Boreal (NGS) and Temperate (cultures)	0.99	Fungi	Ascomycota	Dothideomycetes	Pleosporales
OTU_2049	1103	0	5	1108	Boreal (NGS) and Temperate (cultures)	0.89	Fungi	Ascomycota	Dothideomycetes	Pleosporales	Lophiostomataceae	Lophiostoma	Lophiostoma sp
OTU_2069	246	0	1	247	Boreal (NGS) and Temperate (cultures)	0.83	Fungi	Ascomycota	Leotiomycetes	Helotiales	Helotiaceae	Crocicreas	Crocicreas sp
OTU_224	53	0	3	56	Boreal (NGS) and Temperate (cultures)	0.88	Fungi	Ascomycota
OTU_2246	227	0	4	231	Boreal (NGS) and Temperate (cultures)	0.97	Fungi	Ascomycota	Sordariomycetes	Diaporthales	Schizoparmaceae	Pilidiella
OTU_227	2134	0	2	2136	Boreal (NGS) and Temperate (cultures)	0.92	Fungi	Ascomycota	Incertae sedis	Incertae sedis	Incertae sedis	Chalara	Chalara pseudoaffinis
OTU_2325	2	0	1	3	Boreal (NGS) and Temperate (cultures)	0.92	Fungi	Ascomycota	Sordariomycetes	Hypocreales	Nectriaceae
OTU_2467	72	0	1	73	Boreal (NGS) and Temperate (cultures)	0.87	Fungi	Ascomycota	Dothideomycetes	Pleosporales	Lophiostomataceae	Lophiostoma
OTU_247	10227	0	1	10228	Boreal (NGS) and Temperate (cultures)	0.96	Fungi	Ascomycota
OTU_2601	224	0	4	228	Boreal (NGS) and Temperate (cultures)	0.94	Fungi	Ascomycota	Eurotiomycetes	Chaetothyriales	Herpotrichiellaceae	Phaeomoniella	Phaeomoniella sp
OTU_264	8376	0	3	8379	Boreal (NGS) and Temperate (cultures)	0.92	Fungi	Ascomycota	Sordariomycetes	Hypocreales
OTU_265	135	0	1	136	Boreal (NGS) and Temperate (cultures)	1	Fungi	Ascomycota	Sordariomycetes	Hypocreales	Nectriaceae
OTU_2691	154	0	1	155	Boreal (NGS) and Temperate (cultures)	1	Fungi	Ascomycota	Sordariomycetes	Hypocreales	Ophiocordycipitaceae
OTU_2712	54	0	29	83	Boreal (NGS) and Temperate (cultures)	0.98	Fungi	Ascomycota	Dothideomycetes	Botryosphaeriales	Botryosphaeriaceae	Phyllosticta	Phyllosticta sp
OTU_2734	128	0	2	130	Boreal (NGS) and Temperate (cultures)	0.87	Fungi	Ascomycota
OTU_2758	4	0	135	139	Boreal (NGS) and Temperate (cultures)	0.82	Fungi	Ascomycota	Sordariomycetes
OTU_280	18	0	1	19	Boreal (NGS) and Temperate (cultures)	0.85	Fungi	Ascomycota	Sordariomycetes
OTU_2857	72	0	3	75	Boreal (NGS) and Temperate (cultures)	0.94	Fungi	Ascomycota	Leotiomycetes	Helotiales	Incertae sedis	Sphaerographium	Sphaerographium nyssicola
OTU_2910	202	0	3	205	Boreal (NGS) and Temperate (cultures)	1	Fungi	Ascomycota	Dothideomycetes	Dothideales	Dothioraceae	Sydowia	Sydowia sp
OTU_2986	7	0	1	8	Boreal (NGS) and Temperate (cultures)	0.96	Fungi	Ascomycota
OTU_3	0	0	3	3	Boreal (NGS) and Temperate (cultures)	0.88	Fungi	Ascomycota	Dothideomycetes	Capnodiales	Mycosphaerellaceae	Pseudocercospora
OTU_303	1	0	1	2	Boreal (NGS) and Temperate (cultures)	0.8	Fungi	Ascomycota	Dothideomycetes	Capnodiales	Teratosphaeriaceae
OTU_3098	537	0	2	539	Boreal (NGS) and Temperate (cultures)	1	Fungi	Ascomycota	Sordariomycetes	Xylariales	Xylariaceae	Hypoxylon	Hypoxylon pulicicidum
OTU_316	57	0	5	62	Boreal (NGS) and Temperate (cultures)	1	Fungi	Ascomycota	Eurotiomycetes	Chaetothyriales	Herpotrichiellaceae	Phaeomoniella	Phaeomoniella sp Z94
OTU_3293	49	0	25	74	Boreal (NGS) and Temperate (cultures)	0.82	Fungi	Ascomycota	Sordariomycetes	Xylariales
OTU_331	6256	0	8	6264	Boreal (NGS) and Temperate (cultures)	0.95	Fungi	Ascomycota	Dothideomycetes	Capnodiales
OTU_3484	18	0	47	65	Boreal (NGS) and Temperate (cultures)	0.96	Fungi	Ascomycota	Sordariomycetes	Xylariales	Xylariaceae	Muscodor	Muscodor sp
OTU_3545	47	0	1	48	Boreal (NGS) and Temperate (cultures)	0.9	Fungi	Ascomycota	Incertae sedis	Incertae sedis	Incertae sedis	Polyscytalum	Polyscytalum algarvense
OTU_3652	70	0	2	72	Boreal (NGS) and Temperate (cultures)	0.9	Fungi	Ascomycota	Sordariomycetes	Sordariales	Chaetomiaceae	Chaetomium	Chaetomium sp
OTU_3661	75	0	1	76	Boreal (NGS) and Temperate (cultures)	1	Fungi	Ascomycota	Sordariomycetes	Xylariales	Xylariaceae	Virgaria	Virgaria nigra
OTU_3695	115	0	2	117	Boreal (NGS) and Temperate (cultures)	0.96	Fungi	Ascomycota	Leotiomycetes	Helotiales
OTU_371	438	0	36	474	Boreal (NGS) and Temperate (cultures)	0.86	Fungi	Ascomycota	Sordariomycetes	Diaporthales	Gnomoniaceae
OTU_4207	2	0	5	7	Boreal (NGS) and Temperate (cultures)	1	Fungi
OTU_426	4369	0	1	4370	Boreal (NGS) and Temperate (cultures)	1	Fungi	Ascomycota	Leotiomycetes	Helotiales	Hyaloscyphaceae
OTU_439	12083	0	7	12090	Boreal (NGS) and Temperate (cultures)	0.99	Fungi	Ascomycota	Leotiomycetes	Rhytismatales	Rhytismataceae	Lophodermium	Lophodermium molitoris
OTU_4399	0	0	19	19	Boreal (NGS) and Temperate (cultures)	0.84	Fungi	Ascomycota	Sordariomycetes
OTU_4400	53	0	8	61	Boreal (NGS) and Temperate (cultures)	0.92	Fungi	Ascomycota	Sordariomycetes	Xylariales
OTU_448	3894	0	8	3902	Boreal (NGS) and Temperate (cultures)	1	Fungi	Ascomycota
OTU_4648	51	0	1	52	Boreal (NGS) and Temperate (cultures)	0.95	Fungi	Ascomycota
OTU_4794	42	0	1	43	Boreal (NGS) and Temperate (cultures)	0.96	Fungi	Ascomycota	Sordariomycetes	Chaetosphaeriales	Chaetosphaeriaceae	Chloridium	Chloridium virescens var chlamydosporum
OTU_5003	50	0	1	51	Boreal (NGS) and Temperate (cultures)	1	Fungi	Ascomycota
OTU_5044	16	0	8	24	Boreal (NGS) and Temperate (cultures)	1	Fungi	Ascomycota	Sordariomycetes	Sordariales	Chaetomiaceae	Chaetomium	Chaetomium aureum
OTU_5065	23	0	3	26	Boreal (NGS) and Temperate (cultures)	0.92	Fungi	Ascomycota	Sordariomycetes	Xylariales	Xylariaceae	Anthostomella	Anthostomella sp
OTU_5236	1	0	8	9	Boreal (NGS) and Temperate (cultures)	0.83	Fungi	Ascomycota	Dothideomycetes	Capnodiales	Mycosphaerellaceae	Zasmidium	Zasmidium nocoxi
OTU_5259	9	0	3	12	Boreal (NGS) and Temperate (cultures)	0.96	Fungi	Ascomycota
OTU_5360	763	0	1	764	Boreal (NGS) and Temperate (cultures)	0.99	Fungi	Ascomycota	Leotiomycetes	Helotiales
OTU_5442	7	0	2	9	Boreal (NGS) and Temperate (cultures)	1	Fungi	Ascomycota	Dothideomycetes	Botryosphaeriales	Botryosphaeriaceae
OTU_5477	14	0	1	15	Boreal (NGS) and Temperate (cultures)	0.99	Fungi	Ascomycota
OTU_5724	2	0	6	8	Boreal (NGS) and Temperate (cultures)	0.83	Fungi	Ascomycota	Sordariomycetes	Incertae sedis	Glomerellaceae	Colletotrichum	Colletotrichum navitas
OTU_5727	9	0	4	13	Boreal (NGS) and Temperate (cultures)	1	Fungi	Ascomycota	Dothideomycetes	Pleosporales	Lophiostomataceae	Lophiostoma	Lophiostoma sp DMW2181
OTU_577	6297	0	1	6298	Boreal (NGS) and Temperate (cultures)	0.85	Fungi	Ascomycota	Dothideomycetes	Capnodiales
OTU_5782	0	0	6	6	Boreal (NGS) and Temperate (cultures)	0.97	Fungi	Ascomycota	Sordariomycetes	Boliniales	Boliniaceae	unidentified	Boliniaceae sp
OTU_586	46	0	1	47	Boreal (NGS) and Temperate (cultures)	0.96	Fungi	Ascomycota
OTU_587	103	0	2	105	Boreal (NGS) and Temperate (cultures)	1	Fungi	Ascomycota	Sordariomycetes	Diaporthales	Togniniaceae	Phaeoacremonium
OTU_606	138	0	6	144	Boreal (NGS) and Temperate (cultures)	0.82	Fungi	Ascomycota
OTU_6068	2	0	9	11	Boreal (NGS) and Temperate (cultures)	0.98	Fungi	Ascomycota	Sordariomycetes
OTU_6128	60	0	5	65	Boreal (NGS) and Temperate (cultures)	0.82	Fungi	Ascomycota	Sordariomycetes	Xylariales	Amphisphaeriaceae	Phlogicylindrium	Phlogicylindrium sp 2 ICMP 18859
OTU_6325	11	0	1	12	Boreal (NGS) and Temperate (cultures)	0.8	Fungi	Ascomycota	Dothideomycetes	Capnodiales	Incertae sedis	Hispidoconidioma	Hispidoconidioma sp
OTU_6520	838	0	7	845	Boreal (NGS) and Temperate (cultures)	0.93	Fungi	Ascomycota	Sordariomycetes	Incertae sedis	Glomerellaceae	Colletotrichum	Colletotrichum acerbum
OTU_6747	278	0	1	279	Boreal (NGS) and Temperate (cultures)	1	Fungi	Ascomycota	Dothideomycetes	Capnodiales	Mycosphaerellaceae
OTU_7065	3	0	6	9	Boreal (NGS) and Temperate (cultures)	0.91	Fungi	Ascomycota	Sordariomycetes	Xylariales	Xylariaceae	Xylaria
OTU_7208	12	0	1	13	Boreal (NGS) and Temperate (cultures)	0.99	Fungi	Ascomycota	Dothideomycetes	Pleosporales	Pleosporaceae
OTU_7210	183	0	3	186	Boreal (NGS) and Temperate (cultures)	1	Fungi	Ascomycota
OTU_7231	2437	0	2	2439	Boreal (NGS) and Temperate (cultures)	0.83	Fungi	Ascomycota	Dothideomycetes	Pleosporales	Pleomassariaceae
OTU_7616	92	0	2	94	Boreal (NGS) and Temperate (cultures)	0.83	Fungi	Ascomycota	Eurotiomycetes	Chaetothyriales	Herpotrichiellaceae	Phaeomoniella
OTU_7882	8	0	5	13	Boreal (NGS) and Temperate (cultures)	0.95	Fungi	Ascomycota	Sordariomycetes	Xylariales	Xylariaceae	Xylaria	Xylaria sp L4
OTU_7886	6	0	2	8	Boreal (NGS) and Temperate (cultures)	1	Fungi	Ascomycota	Dothideomycetes	Pleosporales	Massarinaceae	Helminthosporium	Helminthosporium sp
OTU_7911	3	0	1	4	Boreal (NGS) and Temperate (cultures)	0.87	Fungi	Ascomycota	Sordariomycetes	Sordariales	Lasiosphaeriaceae	Zopfiella	Zopfiella marina
OTU_810	1743	0	1	1744	Boreal (NGS) and Temperate (cultures)	0.97	Fungi	Ascomycota	Sordariomycetes	Hypocreales	Nectriaceae
OTU_8158	11	0	1	12	Boreal (NGS) and Temperate (cultures)	0.96	Fungi	Ascomycota
OTU_8563	4	0	1	5	Boreal (NGS) and Temperate (cultures)	1	Fungi	Ascomycota	Sordariomycetes	Diaporthales	Gnomoniaceae	Amphiporthe	Amphiporthe sp
OTU_9086	5	0	1	6	Boreal (NGS) and Temperate (cultures)	1	Fungi
OTU_9477	3	0	1	4	Boreal (NGS) and Temperate (cultures)	0.96	Fungi	Ascomycota	Sordariomycetes	Diaporthales	Diaporthaceae
OTU_9532	3	0	1	4	Boreal (NGS) and Temperate (cultures)	0.97	Fungi	Ascomycota	Pezizomycetes	Pezizales	Sarcosomataceae	Pseudoplectania	Pseudoplectania nigrella
OTU_9537	20	0	2	22	Boreal (NGS) and Temperate (cultures)	1	Fungi	Ascomycota	Pezizomycetes	Pezizales	Sarcosomataceae	Pseudoplectania
