# Supplementary material for: Host availability drives distributions of fungal endophytes in the imperilled boreal realm
Source: Springer Nature journal article supplement (doi:10.1038/s41559-019-0975-2), 2019-09-23
Supplement: MOESM10 [file 41559_2019_975_MOESM10_ESM.xlsx]

## Sheet: Supplementary Table 8
Supplementary Table 8. Accession numbers, site, host and collection information for endophyte cultures from this study. Endophytes were archived as living cultures at the Robert L. Gilbertson Mycological Herbarium at the University of Arizona.
Culture name	ARIZ herbarium accession	Site	Continent	Host Species	Host Lineage	Latitude	Longitude
2011AK1910	ARIZ:2011AK1910	AKE	North America	Pleurozium schreberi	Bryophyta	65.4842	-145.414
2011AK1911	ARIZ:2011AK1911	AKE	North America	Pleurozium schreberi	Bryophyta	65.4842	-145.414
2011AK1912	ARIZ:2011AK1912	AKE	North America	Pleurozium schreberi	Bryophyta	65.4842	-145.414
2011AK1913	ARIZ:2011AK1913	AKE	North America	Pleurozium schreberi	Bryophyta	65.4842	-145.414
2011AK1914	ARIZ:2011AK1914	AKE	North America	Pleurozium schreberi	Bryophyta	65.4842	-145.414
2011AK1915	ARIZ:2011AK1915	AKE	North America	Pleurozium schreberi	Bryophyta	65.4842	-145.414
2011AK1916	ARIZ:2011AK1916	AKE	North America	Pleurozium schreberi	Bryophyta	65.4842	-145.414
2011AK1917	ARIZ:2011AK1917	AKE	North America	Pleurozium schreberi	Bryophyta	65.4842	-145.414
2011AK1918	ARIZ:2011AK1918	AKE	North America	Pleurozium schreberi	Bryophyta	65.4842	-145.414
2011AK1919	ARIZ:2011AK1919	AKE	North America	Pleurozium schreberi	Bryophyta	65.4842	-145.414
2011AK1920	ARIZ:2011AK1920	AKE	North America	Pleurozium schreberi	Bryophyta	65.4842	-145.414
2011AK1921	ARIZ:2011AK1921	AKE	North America	Pleurozium schreberi	Bryophyta	65.4842	-145.414
2011AK1922	ARIZ:2011AK1922	AKE	North America	Pleurozium schreberi	Bryophyta	65.4842	-145.414
2011AK1923	ARIZ:2011AK1923	AKE	North America	Pleurozium schreberi	Bryophyta	65.4842	-145.414
2011AK1924	ARIZ:2011AK1924	AKE	North America	Pleurozium schreberi	Bryophyta	65.4842	-145.414
2011AK1925	ARIZ:2011AK1925	AKE	North America	Pleurozium schreberi	Bryophyta	65.4842	-145.414
2011AK1927	ARIZ:2011AK1927	AKE	North America	Pleurozium schreberi	Bryophyta	65.4849	-145.416
2011AK1928	ARIZ:2011AK1928	AKE	North America	Pleurozium schreberi	Bryophyta	65.4849	-145.416
2011AK1929	ARIZ:2011AK1929	AKE	North America	Pleurozium schreberi	Bryophyta	65.4849	-145.416
2011AK1930	ARIZ:2011AK1930	AKE	North America	Pleurozium schreberi	Bryophyta	65.4849	-145.416
2011AK1931	ARIZ:2011AK1931	AKE	North America	Pleurozium schreberi	Bryophyta	65.4849	-145.416
2011AK1932	ARIZ:2011AK1932	AKE	North America	Pleurozium schreberi	Bryophyta	65.4849	-145.416
2011AK1933	ARIZ:2011AK1933	AKE	North America	Pleurozium schreberi	Bryophyta	65.4849	-145.416
2011AK1934	ARIZ:2011AK1934	AKE	North America	Pleurozium schreberi	Bryophyta	65.4849	-145.416
2011AK1935	ARIZ:2011AK1935	AKE	North America	Pleurozium schreberi	Bryophyta	65.4849	-145.416
2011AK1936	ARIZ:2011AK1936	AKE	North America	Pleurozium schreberi	Bryophyta	65.4849	-145.416
2011AK1937	ARIZ:2011AK1937	AKE	North America	Pleurozium schreberi	Bryophyta	65.4849	-145.416
2011AK1939	ARIZ:2011AK1939	AKE	North America	Pleurozium schreberi	Bryophyta	65.4849	-145.416
2011AK1940	ARIZ:2011AK1940	AKE	North America	Pleurozium schreberi	Bryophyta	65.4849	-145.416
2011AK1941	ARIZ:2011AK1941	AKE	North America	Pleurozium schreberi	Bryophyta	65.4849	-145.416
2011AK1942	ARIZ:2011AK1942	AKE	North America	Pleurozium schreberi	Bryophyta	65.4849	-145.416
2011AK1943	ARIZ:2011AK1943	AKE	North America	Pleurozium schreberi	Bryophyta	65.4849	-145.416
2011AK1944	ARIZ:2011AK1944	AKE	North America	Pleurozium schreberi	Bryophyta	65.4849	-145.416
2011AK1945	ARIZ:2011AK1945	AKE	North America	Pleurozium schreberi	Bryophyta	65.4849	-145.416
2011AK1946	ARIZ:2011AK1946	AKE	North America	Pleurozium schreberi	Bryophyta	65.4849	-145.416
2011AK1947	ARIZ:2011AK1947	AKE	North America	Pleurozium schreberi	Bryophyta	65.4841	-145.417
2011AK1948	ARIZ:2011AK1948	AKE	North America	Pleurozium schreberi	Bryophyta	65.4841	-145.417
2011AK1949	ARIZ:2011AK1949	AKE	North America	Pleurozium schreberi	Bryophyta	65.4841	-145.417
2011AK1950	ARIZ:2011AK1950	AKE	North America	Pleurozium schreberi	Bryophyta	65.4841	-145.417
2011AK1951	ARIZ:2011AK1951	AKE	North America	Pleurozium schreberi	Bryophyta	65.4842	-145.414
2011AK1952	ARIZ:2011AK1952	AKE	North America	Pleurozium schreberi	Bryophyta	65.4842	-145.414
2011AK1953	ARIZ:2011AK1953	AKE	North America	Pleurozium schreberi	Bryophyta	65.4842	-145.414
2011AK1954	ARIZ:2011AK1954	AKE	North America	Pleurozium schreberi	Bryophyta	65.4849	-145.416
2011AK1955	ARIZ:2011AK1955	AKE	North America	Polytrichum commune	Bryophyta	65.4841	-145.417
2011AK1956	ARIZ:2011AK1956	AKE	North America	Polytrichum commune	Bryophyta	65.4841	-145.417
2011AK1957	ARIZ:2011AK1957	AKE	North America	Polytrichum commune	Bryophyta	65.4841	-145.417
2011AK1958	ARIZ:2011AK1958	AKE	North America	Polytrichum commune	Bryophyta	65.4849	-145.416
2011AK1959	ARIZ:2011AK1959	AKE	North America	Polytrichum commune	Bryophyta	65.4849	-145.416
2011AK1960	ARIZ:2011AK1960	AKE	North America	Polytrichum commune	Bryophyta	65.4849	-145.416
2011AK1961	ARIZ:2011AK1961	AKE	North America	Polytrichum commune	Bryophyta	65.4849	-145.416
2011AK1962	ARIZ:2011AK1962	AKE	North America	Huperzia selago	Lycopodiophyta	65.4841	-145.417
2011AK1963	ARIZ:2011AK1963	AKE	North America	Huperzia selago	Lycopodiophyta	65.4841	-145.417
2011AK1964	ARIZ:2011AK1964	AKE	North America	Huperzia selago	Lycopodiophyta	65.4842	-145.414
2011AK1965	ARIZ:2011AK1965	AKE	North America	Huperzia selago	Lycopodiophyta	65.4842	-145.414
2011AK1966	ARIZ:2011AK1966	AKE	North America	Huperzia selago	Lycopodiophyta	65.4842	-145.414
2011AK1967	ARIZ:2011AK1967	AKE	North America	Huperzia selago	Lycopodiophyta	65.4842	-145.414
2011AK1968	ARIZ:2011AK1968	AKE	North America	Huperzia selago	Lycopodiophyta	65.4842	-145.414
2011AK1969	ARIZ:2011AK1969	AKE	North America	Huperzia selago	Lycopodiophyta	65.4842	-145.414
2011AK1970	ARIZ:2011AK1970	AKE	North America	Huperzia selago	Lycopodiophyta	65.4842	-145.414
2011AK1971	ARIZ:2011AK1971	AKE	North America	Huperzia selago	Lycopodiophyta	65.4842	-145.414
2011AK1972	ARIZ:2011AK1972	AKE	North America	Huperzia selago	Lycopodiophyta	65.4849	-145.416
2011AK1973	ARIZ:2011AK1973	AKE	North America	Huperzia selago	Lycopodiophyta	65.4849	-145.416
2011AK1974	ARIZ:2011AK1974	AKE	North America	Picea glauca	Pinophyta	65.4841	-145.417
2011AK1975	ARIZ:2011AK1975	AKE	North America	Picea glauca	Pinophyta	65.4841	-145.417
2011AK1976	ARIZ:2011AK1976	AKE	North America	Picea glauca	Pinophyta	65.4841	-145.417
2011AK1977	ARIZ:2011AK1977	AKE	North America	Picea glauca	Pinophyta	65.4842	-145.414
2011AK1978	ARIZ:2011AK1978	AKE	North America	Picea glauca	Pinophyta	65.4842	-145.414
2011AK1979	ARIZ:2011AK1979	AKE	North America	Picea glauca	Pinophyta	65.4842	-145.414
2011AK1980	ARIZ:2011AK1980	AKE	North America	Picea glauca	Pinophyta	65.4842	-145.414
2011AK1981	ARIZ:2011AK1981	AKE	North America	Picea glauca	Pinophyta	65.4842	-145.414
2011AK1982	ARIZ:2011AK1982	AKE	North America	Picea glauca	Pinophyta	65.4842	-145.414
2011AK1983	ARIZ:2011AK1983	AKE	North America	Rhododendron groenlandicum	Magnoliophyta	65.4841	-145.417
2011AK1984	ARIZ:2011AK1984	AKE	North America	Rhododendron groenlandicum	Magnoliophyta	65.4841	-145.417
2011AK1985	ARIZ:2011AK1985	AKE	North America	Rhododendron groenlandicum	Magnoliophyta	65.4841	-145.417
2011AK1986	ARIZ:2011AK1986	AKE	North America	Rhododendron groenlandicum	Magnoliophyta	65.4841	-145.417
2011AK1987	ARIZ:2011AK1987	AKE	North America	Rhododendron groenlandicum	Magnoliophyta	65.4841	-145.417
2011AK1988	ARIZ:2011AK1988	AKE	North America	Rhododendron groenlandicum	Magnoliophyta	65.4841	-145.417
2011AK1990	ARIZ:2011AK1990	AKE	North America	Rhododendron groenlandicum	Magnoliophyta	65.4841	-145.417
AK1991	ARIZ:AK1991	AKE	North America	Rhododendron groenlandicum	Magnoliophyta	65.4841	-145.417
AK1992	ARIZ:AK1992	AKE	North America	Rhododendron groenlandicum	Magnoliophyta	65.4842	-145.414
AK1993	ARIZ:AK1993	AKE	North America	Rhododendron groenlandicum	Magnoliophyta	65.4842	-145.414
AK1994	ARIZ:AK1994	AKE	North America	Rhododendron groenlandicum	Magnoliophyta	65.4842	-145.414
AK1995	ARIZ:AK1995	AKE	North America	Rhododendron groenlandicum	Magnoliophyta	65.4842	-145.414
AK1996	ARIZ:AK1996	AKE	North America	Rhododendron groenlandicum	Magnoliophyta	65.4842	-145.414
AK1997	ARIZ:AK1997	AKE	North America	Rhododendron groenlandicum	Magnoliophyta	65.4842	-145.414
AK1998	ARIZ:AK1998	AKE	North America	Rhododendron groenlandicum	Magnoliophyta	65.4842	-145.414
AK1999	ARIZ:AK1999	AKE	North America	Rhododendron groenlandicum	Magnoliophyta	65.4842	-145.414
AK2000	ARIZ:AK2000	AKE	North America	Rhododendron groenlandicum	Magnoliophyta	65.4842	-145.414
AK2001	ARIZ:AK2001	AKE	North America	Rhododendron groenlandicum	Magnoliophyta	65.4842	-145.414
AK2002	ARIZ:AK2002	AKE	North America	Rhododendron groenlandicum	Magnoliophyta	65.4842	-145.414
AK2003	ARIZ:AK2003	AKE	North America	Rhododendron groenlandicum	Magnoliophyta	65.4842	-145.414
AK2004	ARIZ:AK2004	AKE	North America	Rhododendron groenlandicum	Magnoliophyta	65.4842	-145.414
AK2005	ARIZ:AK2005	AKE	North America	Rhododendron groenlandicum	Magnoliophyta	65.4842	-145.414
AK2006	ARIZ:AK2006	AKE	North America	Rhododendron groenlandicum	Magnoliophyta	65.4842	-145.414
AK2007	ARIZ:AK2007	AKE	North America	Rhododendron groenlandicum	Magnoliophyta	65.4842	-145.414
AK2008	ARIZ:AK2008	AKE	North America	Rhododendron groenlandicum	Magnoliophyta	65.4842	-145.414
AK2009	ARIZ:AK2009	AKE	North America	Rhododendron groenlandicum	Magnoliophyta	65.4842	-145.414
AK2010	ARIZ:AK2010	AKE	North America	Rhododendron groenlandicum	Magnoliophyta	65.4842	-145.414
AK2011	ARIZ:AK2011	AKE	North America	Rhododendron groenlandicum	Magnoliophyta	65.4842	-145.414
AK2012	ARIZ:AK2012	AKE	North America	Rhododendron groenlandicum	Magnoliophyta	65.4849	-145.416
AK2013	ARIZ:AK2013	AKE	North America	Rhododendron groenlandicum	Magnoliophyta	65.4849	-145.416
AK2014	ARIZ:AK2014	AKE	North America	Rhododendron groenlandicum	Magnoliophyta	65.4849	-145.416
AK2015	ARIZ:AK2015	AKE	North America	Rhododendron groenlandicum	Magnoliophyta	65.4849	-145.416
AK2016	ARIZ:AK2016	AKE	North America	Rhododendron groenlandicum	Magnoliophyta	65.4849	-145.416
AK2017	ARIZ:AK2017	AKE	North America	Rhododendron groenlandicum	Magnoliophyta	65.4849	-145.416
AK2018	ARIZ:AK2018	AKE	North America	Rhododendron groenlandicum	Magnoliophyta	65.4849	-145.416
AK2019	ARIZ:AK2019	AKE	North America	Rhododendron groenlandicum	Magnoliophyta	65.4849	-145.416
AK2020	ARIZ:AK2020	AKE	North America	Rhododendron groenlandicum	Magnoliophyta	65.4849	-145.416
AK2021	ARIZ:AK2021	AKE	North America	Rhododendron groenlandicum	Magnoliophyta	65.4849	-145.416
AK2022	ARIZ:AK2022	AKE	North America	Rhododendron groenlandicum	Magnoliophyta	65.4849	-145.416
AK2023	ARIZ:AK2023	AKE	North America	Rhododendron groenlandicum	Magnoliophyta	65.4849	-145.416
AK2024	ARIZ:AK2024	AKE	North America	Rhododendron groenlandicum	Magnoliophyta	65.4849	-145.416
AK2025	ARIZ:AK2025	AKE	North America	Rhododendron groenlandicum	Magnoliophyta	65.4849	-145.416
AK2026	ARIZ:AK2026	AKE	North America	Rhododendron groenlandicum	Magnoliophyta	65.4849	-145.416
AK2027	ARIZ:AK2027	AKE	North America	Rhododendron groenlandicum	Magnoliophyta	65.4849	-145.416
AK2028	ARIZ:AK2028	AKE	North America	Rhododendron groenlandicum	Magnoliophyta	65.4849	-145.416
AK2029	ARIZ:AK2029	AKE	North America	Rhododendron groenlandicum	Magnoliophyta	65.4849	-145.416
AK2030	ARIZ:AK2030	AKE	North America	Rhododendron groenlandicum	Magnoliophyta	65.4849	-145.416
AK2031	ARIZ:AK2031	AKE	North America	Rhododendron groenlandicum	Magnoliophyta	65.4849	-145.416
AK2032	ARIZ:AK2032	AKE	North America	Rhododendron groenlandicum	Magnoliophyta	65.4849	-145.416
AK2033	ARIZ:AK2033	AKE	North America	Rhododendron groenlandicum	Magnoliophyta	65.4849	-145.416
AK2034	ARIZ:AK2034	AKE	North America	Rhododendron groenlandicum	Magnoliophyta	65.4849	-145.416
AK2035	ARIZ:AK2035	AKE	North America	Rhododendron groenlandicum	Magnoliophyta	65.4849	-145.416
AK2036	ARIZ:AK2036	AKE	North America	Rhododendron groenlandicum	Magnoliophyta	65.4849	-145.416
AK2037	ARIZ:AK2037	AKE	North America	Rhododendron groenlandicum	Magnoliophyta	65.4849	-145.416
AK2038	ARIZ:AK2038	AKE	North America	Rhododendron groenlandicum	Magnoliophyta	65.4849	-145.416
AK2039	ARIZ:AK2039	AKE	North America	Rhododendron groenlandicum	Magnoliophyta	65.4849	-145.416
AK2040A	ARIZ:AK2040A	AKE	North America	Rhododendron groenlandicum	Magnoliophyta	65.4849	-145.416
AK2040B	ARIZ:AK2040B	AKE	North America	Rhododendron groenlandicum	Magnoliophyta	65.4849	-145.416
AK2041	ARIZ:AK2041	AKE	North America	Rhododendron groenlandicum	Magnoliophyta	65.4849	-145.416
AK2042	ARIZ:AK2042	AKE	North America	Cassiope tetragona	Magnoliophyta	65.4841	-145.417
AK2043	ARIZ:AK2043	AKE	North America	Cassiope tetragona	Magnoliophyta	65.4841	-145.417
AK2044	ARIZ:AK2044	AKE	North America	Cassiope tetragona	Magnoliophyta	65.4841	-145.417
AK2045	ARIZ:AK2045	AKE	North America	Cassiope tetragona	Magnoliophyta	65.4841	-145.417
AK2046	ARIZ:AK2046	AKE	North America	Cassiope tetragona	Magnoliophyta	65.4841	-145.417
AK2047	ARIZ:AK2047	AKE	North America	Cassiope tetragona	Magnoliophyta	65.4841	-145.417
AK2048	ARIZ:AK2048	AKE	North America	Cassiope tetragona	Magnoliophyta	65.4842	-145.414
AK2049	ARIZ:AK2049	AKE	North America	Cassiope tetragona	Magnoliophyta	65.4842	-145.414
AK2050	ARIZ:AK2050	AKE	North America	Cassiope tetragona	Magnoliophyta	65.4842	-145.414
AK2051	ARIZ:AK2051	AKE	North America	Cassiope tetragona	Magnoliophyta	65.4842	-145.414
AK2052	ARIZ:AK2052	AKE	North America	Cassiope tetragona	Magnoliophyta	65.4842	-145.414
AK2053	ARIZ:AK2053	AKE	North America	Cassiope tetragona	Magnoliophyta	65.4842	-145.414
AK2054	ARIZ:AK2054	AKE	North America	Cassiope tetragona	Magnoliophyta	65.4842	-145.414
AK2055	ARIZ:AK2055	AKE	North America	Cassiope tetragona	Magnoliophyta	65.4842	-145.414
AK2056	ARIZ:AK2056	AKE	North America	Cassiope tetragona	Magnoliophyta	65.4842	-145.414
AK2058	ARIZ:AK2058	AKE	North America	Cassiope tetragona	Magnoliophyta	65.4842	-145.414
AK2060	ARIZ:AK2060	AKE	North America	Cassiope tetragona	Magnoliophyta	65.4842	-145.414
AK2061	ARIZ:AK2061	AKE	North America	Cassiope tetragona	Magnoliophyta	65.4842	-145.414
AK2062	ARIZ:AK2062	AKE	North America	Cassiope tetragona	Magnoliophyta	65.4842	-145.414
AK2063	ARIZ:AK2063	AKE	North America	Cassiope tetragona	Magnoliophyta	65.4842	-145.414
AK2064	ARIZ:AK2064	AKE	North America	Cassiope tetragona	Magnoliophyta	65.4842	-145.414
AK2065	ARIZ:AK2065	AKE	North America	Cassiope tetragona	Magnoliophyta	65.4842	-145.414
AK2066	ARIZ:AK2066	AKE	North America	Cassiope tetragona	Magnoliophyta	65.4842	-145.414
AK2067	ARIZ:AK2067	AKE	North America	Cassiope tetragona	Magnoliophyta	65.4842	-145.414
AK2068	ARIZ:AK2068	AKE	North America	Cassiope tetragona	Magnoliophyta	65.4842	-145.414
AK2069	ARIZ:AK2069	AKE	North America	Cassiope tetragona	Magnoliophyta	65.4849	-145.416
AK2070	ARIZ:AK2070	AKE	North America	Cassiope tetragona	Magnoliophyta	65.4849	-145.416
AK2072	ARIZ:AK2072	AKE	North America	Cassiope tetragona	Magnoliophyta	65.4849	-145.416
AK2073	ARIZ:AK2073	AKE	North America	Cassiope tetragona	Magnoliophyta	65.4849	-145.416
AK2074	ARIZ:AK2074	AKE	North America	Cassiope tetragona	Magnoliophyta	65.4849	-145.416
AK2075	ARIZ:AK2075	AKE	North America	Cassiope tetragona	Magnoliophyta	65.4849	-145.416
AK2076	ARIZ:AK2076	AKE	North America	Cassiope tetragona	Magnoliophyta	65.4849	-145.416
AK2077	ARIZ:AK2077	AKE	North America	Cassiope tetragona	Magnoliophyta	65.4849	-145.416
AK2078	ARIZ:AK2078	AKE	North America	Cassiope tetragona	Magnoliophyta	65.4849	-145.416
AK2079	ARIZ:AK2079	AKE	North America	Cassiope tetragona	Magnoliophyta	65.4849	-145.416
AK2080	ARIZ:AK2080	AKE	North America	Cassiope tetragona	Magnoliophyta	65.4849	-145.416
AK2081	ARIZ:AK2081	AKE	North America	Cassiope tetragona	Magnoliophyta	65.4849	-145.416
AK2082	ARIZ:AK2082	AKE	North America	Alectoria ochroleuca	Chlorolichen	65.4841	-145.417
AK2083	ARIZ:AK2083	AKE	North America	Alectoria ochroleuca	Chlorolichen	65.4841	-145.417
AK2084	ARIZ:AK2084	AKE	North America	Alectoria ochroleuca	Chlorolichen	65.4841	-145.417
AK2085	ARIZ:AK2085	AKE	North America	Alectoria ochroleuca	Chlorolichen	65.4841	-145.417
AK2086	ARIZ:AK2086	AKE	North America	Alectoria ochroleuca	Chlorolichen	65.4841	-145.417
AK2087	ARIZ:AK2087	AKE	North America	Alectoria ochroleuca	Chlorolichen	65.4842	-145.414
AK2088	ARIZ:AK2088	AKE	North America	Alectoria ochroleuca	Chlorolichen	65.4842	-145.414
AK2089	ARIZ:AK2089	AKE	North America	Alectoria ochroleuca	Chlorolichen	65.4842	-145.414
AK2090	ARIZ:AK2090	AKE	North America	Alectoria ochroleuca	Chlorolichen	65.4842	-145.414
AK2091	ARIZ:AK2091	AKE	North America	Alectoria ochroleuca	Chlorolichen	65.4849	-145.416
AK2092	ARIZ:AK2092	AKE	North America	Alectoria ochroleuca	Chlorolichen	65.4849	-145.416
AK2093	ARIZ:AK2093	AKE	North America	Alectoria ochroleuca	Chlorolichen	65.4849	-145.416
AK2094	ARIZ:AK2094	AKE	North America	Alectoria ochroleuca	Chlorolichen	65.4849	-145.416
AK2096	ARIZ:AK2096	AKE	North America	Alectoria ochroleuca	Chlorolichen	65.4849	-145.416
AK2098	ARIZ:AK2098	AKE	North America	Alectoria ochroleuca	Chlorolichen	65.4849	-145.416
AK2099	ARIZ:AK2099	AKE	North America	Alectoria ochroleuca	Chlorolichen	65.4849	-145.416
AK2100	ARIZ:AK2100	AKE	North America	Alectoria ochroleuca	Chlorolichen	65.4849	-145.416
AK2101	ARIZ:AK2101	AKE	North America	Alectoria ochroleuca	Chlorolichen	65.4849	-145.416
AK2103	ARIZ:AK2103	AKE	North America	Alectoria ochroleuca	Chlorolichen	65.4849	-145.416
AK2104	ARIZ:AK2104	AKE	North America	Flavocetraria cucullata	Chlorolichen	65.4849	-145.416
AK2105	ARIZ:AK2105	AKE	North America	Flavocetraria cucullata	Chlorolichen	65.4849	-145.416
AK2106	ARIZ:AK2106	AKE	North America	Flavocetraria cucullata	Chlorolichen	65.4849	-145.416
AK2107	ARIZ:AK2107	AKE	North America	Flavocetraria cucullata	Chlorolichen	65.4849	-145.416
AK2108	ARIZ:AK2108	AKE	North America	Flavocetraria cucullata	Chlorolichen	65.4849	-145.416
AK2109	ARIZ:AK2109	AKE	North America	Flavocetraria cucullata	Chlorolichen	65.4849	-145.416
AK2110	ARIZ:AK2110	AKE	North America	Flavocetraria cucullata	Chlorolichen	65.4849	-145.416
AK2111	ARIZ:AK2111	AKE	North America	Flavocetraria cucullata	Chlorolichen	65.4849	-145.416
AK2112	ARIZ:AK2112	AKE	North America	Flavocetraria cucullata	Chlorolichen	65.4849	-145.416
AK2113	ARIZ:AK2113	AKE	North America	Flavocetraria cucullata	Chlorolichen	65.4849	-145.416
AK2114	ARIZ:AK2114	AKE	North America	Flavocetraria cucullata	Chlorolichen	65.4849	-145.416
AK2115	ARIZ:AK2115	AKE	North America	Flavocetraria cucullata	Chlorolichen	65.4849	-145.416
AK2116	ARIZ:AK2116	AKE	North America	Flavocetraria cucullata	Chlorolichen	65.4849	-145.416
AK2117	ARIZ:AK2117	AKE	North America	Flavocetraria cucullata	Chlorolichen	65.4849	-145.416
AK2118	ARIZ:AK2118	AKE	North America	Flavocetraria cucullata	Chlorolichen	65.4849	-145.416
AK2119	ARIZ:AK2119	AKE	North America	Flavocetraria cucullata	Chlorolichen	65.4849	-145.416
AK2120	ARIZ:AK2120	AKE	North America	Flavocetraria cucullata	Chlorolichen	65.4849	-145.416
AK2121	ARIZ:AK2121	AKE	North America	Flavocetraria cucullata	Chlorolichen	65.4849	-145.416
AK2122	ARIZ:AK2122	AKE	North America	Flavocetraria cucullata	Chlorolichen	65.4849	-145.416
AK2123	ARIZ:AK2123	AKE	North America	Flavocetraria cucullata	Chlorolichen	65.4849	-145.416
AK2124	ARIZ:AK2124	AKE	North America	Flavocetraria cucullata	Chlorolichen	65.4849	-145.416
AK2125	ARIZ:AK2125	AKE	North America	Flavocetraria cucullata	Chlorolichen	65.4849	-145.416
AK2126	ARIZ:AK2126	AKE	North America	Flavocetraria cucullata	Chlorolichen	65.4849	-145.416
AK2127	ARIZ:AK2127	AKE	North America	Flavocetraria cucullata	Chlorolichen	65.4849	-145.416
AK2128	ARIZ:AK2128	AKE	North America	Flavocetraria cucullata	Chlorolichen	65.4849	-145.416
AK2129	ARIZ:AK2129	AKE	North America	Flavocetraria cucullata	Chlorolichen	65.4849	-145.416
AK2130	ARIZ:AK2130	AKE	North America	Flavocetraria cucullata	Chlorolichen	65.4849	-145.416
AK2131	ARIZ:AK2131	AKE	North America	Flavocetraria cucullata	Chlorolichen	65.4849	-145.416
AK2132	ARIZ:AK2132	AKE	North America	Flavocetraria cucullata	Chlorolichen	65.4849	-145.416
AK2133	ARIZ:AK2133	AKE	North America	Flavocetraria cucullata	Chlorolichen	65.4849	-145.416
AK2134	ARIZ:AK2134	AKE	North America	Flavocetraria cucullata	Chlorolichen	65.4849	-145.416
AK2135	ARIZ:AK2135	AKE	North America	Flavocetraria cucullata	Chlorolichen	65.4849	-145.416
AK2136	ARIZ:AK2136	AKE	North America	Flavocetraria cucullata	Chlorolichen	65.4849	-145.416
AK2137	ARIZ:AK2137	AKE	North America	Flavocetraria cucullata	Chlorolichen	65.4849	-145.416
AK2138	ARIZ:AK2138	AKE	North America	Flavocetraria cucullata	Chlorolichen	65.4849	-145.416
AK2139	ARIZ:AK2139	AKE	North America	Flavocetraria cucullata	Chlorolichen	65.4849	-145.416
AK2140	ARIZ:AK2140	AKE	North America	Flavocetraria cucullata	Chlorolichen	65.4849	-145.416
AK2141	ARIZ:AK2141	AKE	North America	Flavocetraria cucullata	Chlorolichen	65.4849	-145.416
AK2142	ARIZ:AK2142	AKE	North America	Flavocetraria cucullata	Chlorolichen	65.4849	-145.416
AK2143	ARIZ:AK2143	AKE	North America	Flavocetraria cucullata	Chlorolichen	65.4849	-145.416
AK2144	ARIZ:AK2144	AKE	North America	Flavocetraria cucullata	Chlorolichen	65.4849	-145.416
AK2145	ARIZ:AK2145	AKE	North America	Flavocetraria cucullata	Chlorolichen	65.4849	-145.416
AK2146	ARIZ:AK2146	AKE	North America	Peltigera aphthosa	Tripartite	65.4849	-145.416
AK2147	ARIZ:AK2147	AKE	North America	Peltigera aphthosa	Tripartite	65.4849	-145.416
AK2148	ARIZ:AK2148	AKE	North America	Peltigera aphthosa	Tripartite	65.4849	-145.416
AK2149	ARIZ:AK2149	AKE	North America	Peltigera aphthosa	Tripartite	65.4849	-145.416
AK2150	ARIZ:AK2150	AKE	North America	Peltigera aphthosa	Tripartite	65.4849	-145.416
AK2151	ARIZ:AK2151	AKE	North America	Peltigera aphthosa	Tripartite	65.4849	-145.416
AK2152	ARIZ:AK2152	AKE	North America	Peltigera aphthosa	Tripartite	65.4849	-145.416
AK2153	ARIZ:AK2153	AKE	North America	Peltigera aphthosa	Tripartite	65.4849	-145.416
AK2154	ARIZ:AK2154	AKE	North America	Peltigera aphthosa	Tripartite	65.4849	-145.416
AK2155	ARIZ:AK2155	AKE	North America	Peltigera aphthosa	Tripartite	65.4849	-145.416
AK2156	ARIZ:AK2156	AKE	North America	Peltigera aphthosa	Tripartite	65.4849	-145.416
AK2157	ARIZ:AK2157	AKE	North America	Peltigera aphthosa	Tripartite	65.4849	-145.416
AK2158	ARIZ:AK2158	AKE	North America	Peltigera aphthosa	Tripartite	65.4849	-145.416
AK2159	ARIZ:AK2159	AKE	North America	Peltigera aphthosa	Tripartite	65.4849	-145.416
AK2160	ARIZ:AK2160	AKE	North America	Peltigera aphthosa	Tripartite	65.4849	-145.416
AK2161	ARIZ:AK2161	AKE	North America	Peltigera aphthosa	Tripartite	65.4849	-145.416
AK2162	ARIZ:AK2162	AKE	North America	Peltigera aphthosa	Tripartite	65.4849	-145.416
AK2163	ARIZ:AK2163	AKE	North America	Peltigera aphthosa	Tripartite	65.4849	-145.416
AK2164	ARIZ:AK2164	AKE	North America	Peltigera aphthosa	Tripartite	65.4849	-145.416
AK2165	ARIZ:AK2165	AKE	North America	Peltigera aphthosa	Tripartite	65.4849	-145.416
AK2166	ARIZ:AK2166	AKE	North America	Peltigera aphthosa	Tripartite	65.4849	-145.416
AK2167	ARIZ:AK2167	AKE	North America	Peltigera aphthosa	Tripartite	65.4849	-145.416
AK2168	ARIZ:AK2168	AKE	North America	Peltigera aphthosa	Tripartite	65.4849	-145.416
AK2169	ARIZ:AK2169	AKE	North America	Peltigera aphthosa	Tripartite	65.4849	-145.416
AK2170	ARIZ:AK2170	AKE	North America	Peltigera aphthosa	Tripartite	65.4849	-145.416
AK2171	ARIZ:AK2171	AKE	North America	Peltigera aphthosa	Tripartite	65.4849	-145.416
AK2172	ARIZ:AK2172	AKE	North America	Peltigera aphthosa	Tripartite	65.4849	-145.416
AK2173	ARIZ:AK2173	AKE	North America	Peltigera aphthosa	Tripartite	65.4849	-145.416
AK2174	ARIZ:AK2174	AKE	North America	Peltigera aphthosa	Tripartite	65.4849	-145.416
AK2175	ARIZ:AK2175	AKE	North America	Peltigera aphthosa	Tripartite	65.4849	-145.416
AK2176	ARIZ:AK2176	AKE	North America	Peltigera aphthosa	Tripartite	65.4849	-145.416
AK2177	ARIZ:AK2177	AKE	North America	Peltigera aphthosa	Tripartite	65.4849	-145.416
AK2178	ARIZ:AK2178	AKE	North America	Peltigera aphthosa	Tripartite	65.4849	-145.416
AK2179	ARIZ:AK2179	AKE	North America	Peltigera aphthosa	Tripartite	65.4849	-145.416
AK2180	ARIZ:AK2180	AKE	North America	Peltigera aphthosa	Tripartite	65.4849	-145.416
AK2181	ARIZ:AK2181	AKE	North America	Peltigera aphthosa	Tripartite	65.4849	-145.416
AK2182	ARIZ:AK2182	AKE	North America	Peltigera aphthosa	Tripartite	65.4849	-145.416
AK2183	ARIZ:AK2183	AKE	North America	Peltigera aphthosa	Tripartite	65.4849	-145.416
AK2184	ARIZ:AK2184	AKE	North America	Peltigera aphthosa	Tripartite	65.4849	-145.416
AK2185	ARIZ:AK2185	AKE	North America	Peltigera aphthosa	Tripartite	65.4849	-145.416
AK2186	ARIZ:AK2186	AKE	North America	Peltigera aphthosa	Tripartite	65.4849	-145.416
AK2187	ARIZ:AK2187	AKE	North America	Peltigera aphthosa	Tripartite	65.4849	-145.416
AK2188	ARIZ:AK2188	AKE	North America	Peltigera aphthosa	Tripartite	65.4849	-145.416
AK2189	ARIZ:AK2189	AKE	North America	Peltigera aphthosa	Tripartite	65.4849	-145.416
AK2190	ARIZ:AK2190	AKE	North America	Peltigera aphthosa	Tripartite	65.4849	-145.416
AK2191	ARIZ:AK2191	AKE	North America	Peltigera aphthosa	Tripartite	65.4849	-145.416
AK2192	ARIZ:AK2192	AKE	North America	Peltigera aphthosa	Tripartite	65.4849	-145.416
AK2193	ARIZ:AK2193	AKE	North America	Peltigera aphthosa	Tripartite	65.4849	-145.416
AK2194	ARIZ:AK2194	AKE	North America	Peltigera aphthosa	Tripartite	65.4849	-145.416
AK2195	ARIZ:AK2195	AKE	North America	Peltigera aphthosa	Tripartite	65.4849	-145.416
AK2196	ARIZ:AK2196	AKE	North America	Peltigera aphthosa	Tripartite	65.4849	-145.416
AK2197	ARIZ:AK2197	AKE	North America	Peltigera aphthosa	Tripartite	65.4849	-145.416
AK2198	ARIZ:AK2198	AKE	North America	Peltigera aphthosa	Tripartite	65.4849	-145.416
AK2199	ARIZ:AK2199	AKE	North America	Peltigera aphthosa	Tripartite	65.4849	-145.416
AK2200	ARIZ:AK2200	AKE	North America	Peltigera aphthosa	Tripartite	65.4849	-145.416
AK2201	ARIZ:AK2201	AKE	North America	Peltigera aphthosa	Tripartite	65.4842	-145.414
AK2202	ARIZ:AK2202	AKE	North America	Peltigera aphthosa	Tripartite	65.4842	-145.414
AK2203	ARIZ:AK2203	AKE	North America	Peltigera aphthosa	Tripartite	65.4842	-145.414
AK2204	ARIZ:AK2204	AKE	North America	Peltigera aphthosa	Tripartite	65.4842	-145.414
AK2205	ARIZ:AK2205	AKE	North America	Peltigera aphthosa	Tripartite	65.4842	-145.414
AK2206	ARIZ:AK2206	AKE	North America	Peltigera aphthosa	Tripartite	65.4842	-145.414
AK2207	ARIZ:AK2207	AKE	North America	Peltigera aphthosa	Tripartite	65.4842	-145.414
AK2208	ARIZ:AK2208	AKE	North America	Peltigera aphthosa	Tripartite	65.4842	-145.414
AK2209	ARIZ:AK2209	AKE	North America	Peltigera aphthosa	Tripartite	65.4842	-145.414
AK2210	ARIZ:AK2210	AKE	North America	Peltigera aphthosa	Tripartite	65.4842	-145.414
AK2211	ARIZ:AK2211	AKE	North America	Peltigera aphthosa	Tripartite	65.4842	-145.414
AK2212	ARIZ:AK2212	AKE	North America	Peltigera aphthosa	Tripartite	65.4842	-145.414
AK2213	ARIZ:AK2213	AKE	North America	Peltigera aphthosa	Tripartite	65.4842	-145.414
AK2214	ARIZ:AK2214	AKE	North America	Peltigera aphthosa	Tripartite	65.4842	-145.414
AK2215	ARIZ:AK2215	AKE	North America	Peltigera aphthosa	Tripartite	65.4842	-145.414
AK2216	ARIZ:AK2216	AKE	North America	Peltigera aphthosa	Tripartite	65.4842	-145.414
AK2217	ARIZ:AK2217	AKE	North America	Peltigera aphthosa	Tripartite	65.4842	-145.414
AK2218	ARIZ:AK2218	AKE	North America	Peltigera aphthosa	Tripartite	65.4842	-145.414
AK2220	ARIZ:AK2220	AKE	North America	Peltigera aphthosa	Tripartite	65.4842	-145.414
AK2221	ARIZ:AK2221	AKE	North America	Peltigera aphthosa	Tripartite	65.4842	-145.414
AK2222	ARIZ:AK2222	AKE	North America	Peltigera aphthosa	Tripartite	65.4842	-145.414
AK2223	ARIZ:AK2223	AKE	North America	Peltigera aphthosa	Tripartite	65.4842	-145.414
AK2224	ARIZ:AK2224	AKE	North America	Peltigera aphthosa	Tripartite	65.4842	-145.414
AK2226	ARIZ:AK2226	AKE	North America	Peltigera aphthosa	Tripartite	65.4842	-145.414
AK2227	ARIZ:AK2227	AKE	North America	Peltigera aphthosa	Tripartite	65.4842	-145.414
AK2229	ARIZ:AK2229	AKE	North America	Peltigera aphthosa	Tripartite	65.4842	-145.414
AK2230	ARIZ:AK2230	AKE	North America	Peltigera aphthosa	Tripartite	65.4842	-145.414
AK2231	ARIZ:AK2231	AKE	North America	Peltigera aphthosa	Tripartite	65.4842	-145.414
AK2232	ARIZ:AK2232	AKE	North America	Peltigera aphthosa	Tripartite	65.4842	-145.414
AK2233	ARIZ:AK2233	AKE	North America	Peltigera aphthosa	Tripartite	65.4842	-145.414
AK2234	ARIZ:AK2234	AKE	North America	Peltigera aphthosa	Tripartite	65.4842	-145.414
AK2235	ARIZ:AK2235	AKE	North America	Peltigera aphthosa	Tripartite	65.4842	-145.414
AK2237	ARIZ:AK2237	AKE	North America	Peltigera aphthosa	Tripartite	65.4842	-145.414
AK2238	ARIZ:AK2238	AKE	North America	Peltigera aphthosa	Tripartite	65.4842	-145.414
AK2239	ARIZ:AK2239	AKE	North America	Peltigera aphthosa	Tripartite	65.4842	-145.414
AK2240	ARIZ:AK2240	AKE	North America	Peltigera aphthosa	Tripartite	65.4842	-145.414
AK2241	ARIZ:AK2241	AKE	North America	Peltigera aphthosa	Tripartite	65.4842	-145.414
AK2242	ARIZ:AK2242	AKE	North America	Peltigera aphthosa	Tripartite	65.4842	-145.414
AK2243	ARIZ:AK2243	AKE	North America	Peltigera aphthosa	Tripartite	65.4842	-145.414
AK2244	ARIZ:AK2244	AKE	North America	Peltigera aphthosa	Tripartite	65.4842	-145.414
AK2245	ARIZ:AK2245	AKE	North America	Peltigera aphthosa	Tripartite	65.4842	-145.414
AK2246	ARIZ:AK2246	AKE	North America	Peltigera aphthosa	Tripartite	65.4842	-145.414
AK2247	ARIZ:AK2247	AKE	North America	Peltigera aphthosa	Tripartite	65.4842	-145.414
AK2248	ARIZ:AK2248	AKE	North America	Peltigera aphthosa	Tripartite	65.4842	-145.414
AK2249	ARIZ:AK2249	AKE	North America	Peltigera aphthosa	Tripartite	65.4842	-145.414
AK2250	ARIZ:AK2250	AKE	North America	Peltigera aphthosa	Tripartite	65.4842	-145.414
AK2251	ARIZ:AK2251	AKE	North America	Peltigera aphthosa	Tripartite	65.4842	-145.414
AK2252	ARIZ:AK2252	AKE	North America	Peltigera aphthosa	Tripartite	65.4842	-145.414
AK2253	ARIZ:AK2253	AKE	North America	Peltigera aphthosa	Tripartite	65.4842	-145.414
AK2254	ARIZ:AK2254	AKE	North America	Peltigera aphthosa	Tripartite	65.4842	-145.414
AK2255	ARIZ:AK2255	AKE	North America	Peltigera aphthosa	Tripartite	65.4842	-145.414
AK2256	ARIZ:AK2256	AKE	North America	Peltigera aphthosa	Tripartite	65.4842	-145.414
AK2257	ARIZ:AK2257	AKE	North America	Peltigera aphthosa	Tripartite	65.4842	-145.414
AK2258	ARIZ:AK2258	AKE	North America	Peltigera aphthosa	Tripartite	65.4842	-145.414
AK2259	ARIZ:AK2259	AKE	North America	Peltigera aphthosa	Tripartite	65.4842	-145.414
AK2260	ARIZ:AK2260	AKE	North America	Peltigera aphthosa	Tripartite	65.4842	-145.414
AK2261	ARIZ:AK2261	AKE	North America	Peltigera aphthosa	Tripartite	65.4842	-145.414
AK2262	ARIZ:AK2262	AKE	North America	Peltigera aphthosa	Tripartite	65.4842	-145.414
AK2263	ARIZ:AK2263	AKE	North America	Peltigera aphthosa	Tripartite	65.4842	-145.414
AK2264	ARIZ:AK2264	AKE	North America	Peltigera aphthosa	Tripartite	65.4842	-145.414
AK2265	ARIZ:AK2265	AKE	North America	Peltigera aphthosa	Tripartite	65.4842	-145.414
AK2266	ARIZ:AK2266	AKE	North America	Peltigera aphthosa	Tripartite	65.4842	-145.414
AK2267	ARIZ:AK2267	AKE	North America	Peltigera aphthosa	Tripartite	65.4842	-145.414
AK2268	ARIZ:AK2268	AKE	North America	Peltigera aphthosa	Tripartite	65.4842	-145.414
AK2270	ARIZ:AK2270	AKE	North America	Peltigera aphthosa	Tripartite	65.4842	-145.414
AK2271	ARIZ:AK2271	AKE	North America	Peltigera aphthosa	Tripartite	65.4842	-145.414
AK2272	ARIZ:AK2272	AKE	North America	Peltigera aphthosa	Tripartite	65.4842	-145.414
AK2274	ARIZ:AK2274	AKE	North America	Peltigera aphthosa	Tripartite	65.4842	-145.414
AK2275	ARIZ:AK2275	AKE	North America	Peltigera aphthosa	Tripartite	65.4842	-145.414
AK2276	ARIZ:AK2276	AKE	North America	Peltigera aphthosa	Tripartite	65.4842	-145.414
AK2277	ARIZ:AK2277	AKE	North America	Peltigera aphthosa	Tripartite	65.4842	-145.414
AK2278	ARIZ:AK2278	AKE	North America	Peltigera aphthosa	Tripartite	65.4842	-145.414
AK2279	ARIZ:AK2279	AKE	North America	Peltigera aphthosa	Tripartite	65.4842	-145.414
AK2280	ARIZ:AK2280	AKE	North America	Peltigera aphthosa	Tripartite	65.4842	-145.414
AK2281	ARIZ:AK2281	AKE	North America	Peltigera aphthosa	Tripartite	65.4842	-145.414
AK2282	ARIZ:AK2282	AKE	North America	Peltigera aphthosa	Tripartite	65.4842	-145.414
AK2283	ARIZ:AK2283	AKE	North America	Peltigera aphthosa	Tripartite	65.4842	-145.414
AK2284	ARIZ:AK2284	AKE	North America	Peltigera aphthosa	Tripartite	65.4842	-145.414
AK2285	ARIZ:AK2285	AKE	North America	Peltigera aphthosa	Tripartite	65.4842	-145.414
AK2286	ARIZ:AK2286	AKE	North America	Peltigera aphthosa	Tripartite	65.4849	-145.416
AK2287	ARIZ:AK2287	AKE	North America	Peltigera aphthosa	Tripartite	65.4849	-145.416
AK2288	ARIZ:AK2288	AKE	North America	Peltigera aphthosa	Tripartite	65.4849	-145.416
AK2289	ARIZ:AK2289	AKE	North America	Peltigera aphthosa	Tripartite	65.4849	-145.416
AK2290	ARIZ:AK2290	AKE	North America	Peltigera aphthosa	Tripartite	65.4849	-145.416
AK2291	ARIZ:AK2291	AKE	North America	Peltigera aphthosa	Tripartite	65.4849	-145.416
AK2292	ARIZ:AK2292	AKE	North America	Peltigera aphthosa	Tripartite	65.4849	-145.416
AK2293	ARIZ:AK2293	AKE	North America	Peltigera aphthosa	Tripartite	65.4849	-145.416
AK2294	ARIZ:AK2294	AKE	North America	Peltigera aphthosa	Tripartite	65.4849	-145.416
AK2295	ARIZ:AK2295	AKE	North America	Peltigera aphthosa	Tripartite	65.4849	-145.416
AK2296	ARIZ:AK2296	AKE	North America	Cladonia mitis	Chlorolichen	65.4849	-145.416
AK2297	ARIZ:AK2297	AKE	North America	Cladonia mitis	Chlorolichen	65.4849	-145.416
AK2298	ARIZ:AK2298	AKE	North America	Cladonia mitis	Chlorolichen	65.4849	-145.416
AK2299	ARIZ:AK2299	AKE	North America	Cladonia mitis	Chlorolichen	65.4849	-145.416
AK2300	ARIZ:AK2300	AKE	North America	Cladonia mitis	Chlorolichen	65.4849	-145.416
AK2301	ARIZ:AK2301	AKE	North America	Cladonia mitis	Chlorolichen	65.4849	-145.416
AK2302	ARIZ:AK2302	AKE	North America	Cladonia mitis	Chlorolichen	65.4849	-145.416
AK2303	ARIZ:AK2303	AKE	North America	Cladonia mitis	Chlorolichen	65.4849	-145.416
AK2304	ARIZ:AK2304	AKE	North America	Cladonia mitis	Chlorolichen	65.4849	-145.416
AK2305	ARIZ:AK2305	AKE	North America	Cladonia mitis	Chlorolichen	65.4849	-145.416
AK2306	ARIZ:AK2306	AKE	North America	Cladonia mitis	Chlorolichen	65.4849	-145.416
AK2307	ARIZ:AK2307	AKE	North America	Cladonia mitis	Chlorolichen	65.4849	-145.416
AK2308	ARIZ:AK2308	AKE	North America	Cladonia mitis	Chlorolichen	65.4849	-145.416
AK2309	ARIZ:AK2309	AKE	North America	Cladonia mitis	Chlorolichen	65.4849	-145.416
AK2311	ARIZ:AK2311	AKE	North America	Cladonia mitis	Chlorolichen	65.4849	-145.416
AK2312	ARIZ:AK2312	AKE	North America	Cladonia mitis	Chlorolichen	65.4849	-145.416
AK2313	ARIZ:AK2313	AKE	North America	Cladonia mitis	Chlorolichen	65.4849	-145.416
AK2314	ARIZ:AK2314	AKE	North America	Cladonia mitis	Chlorolichen	65.4849	-145.416
AK2315	ARIZ:AK2315	AKE	North America	Cladonia mitis	Chlorolichen	65.4849	-145.416
AK2316	ARIZ:AK2316	AKE	North America	Cladonia mitis	Chlorolichen	65.4849	-145.416
AK2317	ARIZ:AK2317	AKE	North America	Cladonia mitis	Chlorolichen	65.4849	-145.416
AK2318	ARIZ:AK2318	AKE	North America	Cladonia mitis	Chlorolichen	65.4849	-145.416
AK2319	ARIZ:AK2319	AKE	North America	Cladonia mitis	Chlorolichen	65.4849	-145.416
AK2320	ARIZ:AK2320	AKE	North America	Cladonia mitis	Chlorolichen	65.4849	-145.416
AK2321	ARIZ:AK2321	AKE	North America	Cladonia mitis	Chlorolichen	65.4849	-145.416
AK2322	ARIZ:AK2322	AKE	North America	Cladonia mitis	Chlorolichen	65.4849	-145.416
AK2323	ARIZ:AK2323	AKE	North America	Cladonia mitis	Chlorolichen	65.4849	-145.416
AK2324	ARIZ:AK2324	AKE	North America	Cladonia mitis	Chlorolichen	65.4849	-145.416
AK2325	ARIZ:AK2325	AKE	North America	Cladonia mitis	Chlorolichen	65.4849	-145.416
AK2326	ARIZ:AK2326	AKE	North America	Cladonia mitis	Chlorolichen	65.4849	-145.416
AK2327	ARIZ:AK2327	AKE	North America	Cladonia mitis	Chlorolichen	65.4849	-145.416
AK2328	ARIZ:AK2328	AKE	North America	Cladonia mitis	Chlorolichen	65.4849	-145.416
AK2329	ARIZ:AK2329	AKE	North America	Cladonia mitis	Chlorolichen	65.4849	-145.416
AK2330	ARIZ:AK2330	AKE	North America	Cladonia mitis	Chlorolichen	65.4849	-145.416
AK2331	ARIZ:AK2331	AKE	North America	Cladonia mitis	Chlorolichen	65.4849	-145.416
AK2332	ARIZ:AK2332	AKE	North America	Cladonia mitis	Chlorolichen	65.4849	-145.416
AK2333	ARIZ:AK2333	AKE	North America	Cladonia mitis	Chlorolichen	65.4849	-145.416
AK2334	ARIZ:AK2334	AKE	North America	Cladonia mitis	Chlorolichen	65.4849	-145.416
AK2335	ARIZ:AK2335	AKE	North America	Cladonia mitis	Chlorolichen	65.4849	-145.416
AK2336	ARIZ:AK2336	AKE	North America	Cladonia mitis	Chlorolichen	65.4849	-145.416
AK2337	ARIZ:AK2337	AKE	North America	Cladonia mitis	Chlorolichen	65.4849	-145.416
AK2338	ARIZ:AK2338	AKE	North America	Cladonia mitis	Chlorolichen	65.4849	-145.416
AK2339	ARIZ:AK2339	AKE	North America	Cladonia mitis	Chlorolichen	65.4849	-145.416
AK2340	ARIZ:AK2340	AKE	North America	Cladonia mitis	Chlorolichen	65.4849	-145.416
AK2341	ARIZ:AK2341	AKE	North America	Cladonia mitis	Chlorolichen	65.4849	-145.416
AK2342	ARIZ:AK2342	AKE	North America	Cladonia mitis	Chlorolichen	65.4849	-145.416
AK2343	ARIZ:AK2343	AKE	North America	Cladonia mitis	Chlorolichen	65.4849	-145.416
AK2344	ARIZ:AK2344	AKE	North America	Cladonia mitis	Chlorolichen	65.4849	-145.416
AK2345	ARIZ:AK2345	AKE	North America	Cladonia mitis	Chlorolichen	65.4849	-145.416
AK2346	ARIZ:AK2346	AKE	North America	Cladonia mitis	Chlorolichen	65.4849	-145.416
AK2347	ARIZ:AK2347	AKE	North America	Cladonia mitis	Chlorolichen	65.4849	-145.416
AK2348	ARIZ:AK2348	AKE	North America	Cladonia mitis	Chlorolichen	65.4849	-145.416
AK2349	ARIZ:AK2349	AKE	North America	Cladonia mitis	Chlorolichen	65.4849	-145.416
AK2350	ARIZ:AK2350	AKE	North America	Cladonia mitis	Chlorolichen	65.4849	-145.416
AK2351	ARIZ:AK2351	AKE	North America	Cladonia mitis	Chlorolichen	65.4849	-145.416
AK2352	ARIZ:AK2352	AKE	North America	Cladonia mitis	Chlorolichen	65.4849	-145.416
AK2353	ARIZ:AK2353	AKE	North America	Cladonia mitis	Chlorolichen	65.4849	-145.416
AK2354	ARIZ:AK2354	AKE	North America	Cladonia mitis	Chlorolichen	65.4849	-145.416
AK2355	ARIZ:AK2355	AKE	North America	Cladonia mitis	Chlorolichen	65.4849	-145.416
AK2356	ARIZ:AK2356	AKE	North America	Cladonia mitis	Chlorolichen	65.4849	-145.416
AK2357	ARIZ:AK2357	AKE	North America	Cladonia mitis	Chlorolichen	65.4849	-145.416
AK2358	ARIZ:AK2358	AKE	North America	Cladonia mitis	Chlorolichen	65.4849	-145.416
AK2359	ARIZ:AK2359	AKE	North America	Cladonia mitis	Chlorolichen	65.4849	-145.416
AK2360	ARIZ:AK2360	AKE	North America	Cladonia mitis	Chlorolichen	65.4849	-145.416
AK2361	ARIZ:AK2361	AKE	North America	Cladonia mitis	Chlorolichen	65.4849	-145.416
AK2363	ARIZ:AK2363	AKE	North America	Cladonia mitis	Chlorolichen	65.4849	-145.416
AK2364	ARIZ:AK2364	AKE	North America	Cladonia mitis	Chlorolichen	65.4849	-145.416
AK2365	ARIZ:AK2365	AKE	North America	Cladonia mitis	Chlorolichen	65.4849	-145.416
AK2366	ARIZ:AK2366	AKE	North America	Cladonia mitis	Chlorolichen	65.4849	-145.416
AK2367	ARIZ:AK2367	AKE	North America	Cladonia mitis	Chlorolichen	65.4849	-145.416
AK2368	ARIZ:AK2368	AKE	North America	Cladonia mitis	Chlorolichen	65.4849	-145.416
AK2369	ARIZ:AK2369	AKE	North America	Cladonia mitis	Chlorolichen	65.4849	-145.416
AK2370	ARIZ:AK2370	AKE	North America	Cladonia mitis	Chlorolichen	65.4849	-145.416
AK2371	ARIZ:AK2371	AKE	North America	Cladonia mitis	Chlorolichen	65.4849	-145.416
AK2372	ARIZ:AK2372	AKE	North America	Cladonia mitis	Chlorolichen	65.4849	-145.416
AK2373	ARIZ:AK2373	AKE	North America	Cladonia mitis	Chlorolichen	65.4849	-145.416
AK2374	ARIZ:AK2374	AKE	North America	Cladonia mitis	Chlorolichen	65.4849	-145.416
AK2375	ARIZ:AK2375	AKE	North America	Cladonia mitis	Chlorolichen	65.4849	-145.416
AK2376	ARIZ:AK2376	AKE	North America	Peltigera aphthosa	Tripartite	65.4841	-145.417
AK2377	ARIZ:AK2377	AKE	North America	Peltigera aphthosa	Tripartite	65.4841	-145.417
AK2378	ARIZ:AK2378	AKE	North America	Peltigera aphthosa	Tripartite	65.4841	-145.417
AK2380	ARIZ:AK2380	AKE	North America	Peltigera aphthosa	Tripartite	65.4841	-145.417
AK2381	ARIZ:AK2381	AKE	North America	Peltigera aphthosa	Tripartite	65.4841	-145.417
AK2382	ARIZ:AK2382	AKE	North America	Peltigera aphthosa	Tripartite	65.4841	-145.417
AK2383	ARIZ:AK2383	AKE	North America	Peltigera aphthosa	Tripartite	65.4841	-145.417
AK2384	ARIZ:AK2384	AKE	North America	Peltigera aphthosa	Tripartite	65.4841	-145.417
AK2385	ARIZ:AK2385	AKE	North America	Peltigera aphthosa	Tripartite	65.4841	-145.417
AK2386	ARIZ:AK2386	AKE	North America	Peltigera aphthosa	Tripartite	65.4841	-145.417
AK2387	ARIZ:AK2387	AKE	North America	Peltigera aphthosa	Tripartite	65.4841	-145.417
AK2388	ARIZ:AK2388	AKE	North America	Peltigera aphthosa	Tripartite	65.4841	-145.417
AK2389	ARIZ:AK2389	AKE	North America	Peltigera aphthosa	Tripartite	65.4841	-145.417
AK2390	ARIZ:AK2390	AKE	North America	Peltigera aphthosa	Tripartite	65.4841	-145.417
AK2391	ARIZ:AK2391	AKE	North America	Peltigera aphthosa	Tripartite	65.4841	-145.417
AK2392	ARIZ:AK2392	AKE	North America	Peltigera aphthosa	Tripartite	65.4841	-145.417
AK2393	ARIZ:AK2393	AKE	North America	Peltigera aphthosa	Tripartite	65.4841	-145.417
AK2394	ARIZ:AK2394	AKE	North America	Peltigera aphthosa	Tripartite	65.4841	-145.417
AK2395	ARIZ:AK2395	AKE	North America	Peltigera aphthosa	Tripartite	65.4841	-145.417
AK2396	ARIZ:AK2396	AKE	North America	Peltigera aphthosa	Tripartite	65.4841	-145.417
AK2397	ARIZ:AK2397	AKE	North America	Peltigera aphthosa	Tripartite	65.4841	-145.417
AK2398	ARIZ:AK2398	AKE	North America	Peltigera aphthosa	Tripartite	65.4841	-145.417
AK2399	ARIZ:AK2399	AKE	North America	Peltigera aphthosa	Tripartite	65.4841	-145.417
AK2400	ARIZ:AK2400	AKE	North America	Peltigera aphthosa	Tripartite	65.4841	-145.417
AK2401	ARIZ:AK2401	AKE	North America	Peltigera aphthosa	Tripartite	65.4841	-145.417
AK2402	ARIZ:AK2402	AKE	North America	Peltigera aphthosa	Tripartite	65.4841	-145.417
AK2403	ARIZ:AK2403	AKE	North America	Peltigera aphthosa	Tripartite	65.4841	-145.417
AK2404	ARIZ:AK2404	AKE	North America	Peltigera aphthosa	Tripartite	65.4841	-145.417
AK2405	ARIZ:AK2405	AKE	North America	Peltigera aphthosa	Tripartite	65.4841	-145.417
AK2406	ARIZ:AK2406	AKE	North America	Peltigera aphthosa	Tripartite	65.4841	-145.417
AK2407	ARIZ:AK2407	AKE	North America	Peltigera aphthosa	Tripartite	65.4841	-145.417
AK2408	ARIZ:AK2408	AKE	North America	Peltigera aphthosa	Tripartite	65.4841	-145.417
AK2409	ARIZ:AK2409	AKE	North America	Peltigera aphthosa	Tripartite	65.4841	-145.417
AK2410	ARIZ:AK2410	AKE	North America	Peltigera aphthosa	Tripartite	65.4841	-145.417
AK2411	ARIZ:AK2411	AKE	North America	Peltigera aphthosa	Tripartite	65.4841	-145.417
AK2412	ARIZ:AK2412	AKE	North America	Peltigera aphthosa	Tripartite	65.4841	-145.417
AK2413	ARIZ:AK2413	AKE	North America	Peltigera aphthosa	Tripartite	65.4841	-145.417
AK2414	ARIZ:AK2414	AKE	North America	Peltigera aphthosa	Tripartite	65.4841	-145.417
AK2415	ARIZ:AK2415	AKE	North America	Peltigera aphthosa	Tripartite	65.4841	-145.417
AK2416	ARIZ:AK2416	AKE	North America	Peltigera aphthosa	Tripartite	65.4841	-145.417
AK2417	ARIZ:AK2417	AKE	North America	Peltigera aphthosa	Tripartite	65.4841	-145.417
AK2418	ARIZ:AK2418	AKE	North America	Peltigera aphthosa	Tripartite	65.4841	-145.417
AK2419	ARIZ:AK2419	AKE	North America	Peltigera aphthosa	Tripartite	65.4841	-145.417
AK2420	ARIZ:AK2420	AKE	North America	Peltigera aphthosa	Tripartite	65.4841	-145.417
AK2421	ARIZ:AK2421	AKE	North America	Peltigera aphthosa	Tripartite	65.4841	-145.417
AK2422	ARIZ:AK2422	AKE	North America	Peltigera aphthosa	Tripartite	65.4841	-145.417
AK2423	ARIZ:AK2423	AKE	North America	Peltigera aphthosa	Tripartite	65.4841	-145.417
AK2424	ARIZ:AK2424	AKE	North America	Peltigera aphthosa	Tripartite	65.4841	-145.417
AK2425	ARIZ:AK2425	AKE	North America	Peltigera aphthosa	Tripartite	65.4841	-145.417
AK2426	ARIZ:AK2426	AKE	North America	Peltigera aphthosa	Tripartite	65.4841	-145.417
AK2427	ARIZ:AK2427	AKE	North America	Peltigera aphthosa	Tripartite	65.4841	-145.417
AK2428	ARIZ:AK2428	AKE	North America	Peltigera aphthosa	Tripartite	65.4841	-145.417
AK2429	ARIZ:AK2429	AKE	North America	Peltigera aphthosa	Tripartite	65.4841	-145.417
AK2431	ARIZ:AK2431	AKE	North America	Peltigera aphthosa	Tripartite	65.4841	-145.417
AK2432	ARIZ:AK2432	AKE	North America	Peltigera aphthosa	Tripartite	65.4841	-145.417
AK2433	ARIZ:AK2433	AKE	North America	Peltigera aphthosa	Tripartite	65.4841	-145.417
AK2434	ARIZ:AK2434	AKE	North America	Peltigera aphthosa	Tripartite	65.4841	-145.417
AK2435	ARIZ:AK2435	AKE	North America	Peltigera aphthosa	Tripartite	65.4841	-145.417
AK2436	ARIZ:AK2436	AKE	North America	Peltigera aphthosa	Tripartite	65.4841	-145.417
AK2437	ARIZ:AK2437	AKE	North America	Peltigera aphthosa	Tripartite	65.4841	-145.417
AK2438	ARIZ:AK2438	AKE	North America	Peltigera aphthosa	Tripartite	65.4841	-145.417
AK2439	ARIZ:AK2439	AKE	North America	Peltigera aphthosa	Tripartite	65.4841	-145.417
AK2440	ARIZ:AK2440	AKE	North America	Peltigera aphthosa	Tripartite	65.4841	-145.417
AK2441	ARIZ:AK2441	AKE	North America	Peltigera aphthosa	Tripartite	65.4841	-145.417
AK2442	ARIZ:AK2442	AKE	North America	Peltigera aphthosa	Tripartite	65.4841	-145.417
AK2443	ARIZ:AK2443	AKE	North America	Peltigera aphthosa	Tripartite	65.4841	-145.417
AK2446	ARIZ:AK2446	AKE	North America	Peltigera aphthosa	Tripartite	65.4841	-145.417
AK2447	ARIZ:AK2447	AKE	North America	Peltigera aphthosa	Tripartite	65.4841	-145.417
AK2448	ARIZ:AK2448	AKE	North America	Peltigera aphthosa	Tripartite	65.4841	-145.417
AK2449	ARIZ:AK2449	AKE	North America	Peltigera aphthosa	Tripartite	65.4841	-145.417
AK2450	ARIZ:AK2450	AKE	North America	Peltigera aphthosa	Tripartite	65.4841	-145.417
AK2451	ARIZ:AK2451	AKE	North America	Peltigera aphthosa	Tripartite	65.4841	-145.417
AK2452	ARIZ:AK2452	AKE	North America	Peltigera aphthosa	Tripartite	65.4841	-145.417
AK2454	ARIZ:AK2454	AKE	North America	Peltigera aphthosa	Tripartite	65.4841	-145.417
AK2455	ARIZ:AK2455	AKE	North America	Peltigera aphthosa	Tripartite	65.4841	-145.417
AK2456	ARIZ:AK2456	AKE	North America	Peltigera aphthosa	Tripartite	65.4841	-145.417
AK2457	ARIZ:AK2457	AKE	North America	Peltigera aphthosa	Tripartite	65.4841	-145.417
AK2458	ARIZ:AK2458	AKE	North America	Peltigera aphthosa	Tripartite	65.4841	-145.417
AK2459	ARIZ:AK2459	AKE	North America	Peltigera aphthosa	Tripartite	65.4841	-145.417
AK2460	ARIZ:AK2460	AKE	North America	Peltigera aphthosa	Tripartite	65.4841	-145.417
AK2461	ARIZ:AK2461	AKE	North America	Peltigera aphthosa	Tripartite	65.4841	-145.417
AK2462	ARIZ:AK2462	AKE	North America	Peltigera aphthosa	Tripartite	65.4841	-145.417
AK2463	ARIZ:AK2463	AKE	North America	Rhizocarpon cf geographicum	Chlorolichen	65.4849	-145.416
AK2464	ARIZ:AK2464	AKE	North America	Rhizocarpon cf geographicum	Chlorolichen	65.4849	-145.416
AK2465	ARIZ:AK2465	AKE	North America	Rhizocarpon cf geographicum	Chlorolichen	65.4849	-145.416
AK2466	ARIZ:AK2466	AKE	North America	Rhizocarpon cf geographicum	Chlorolichen	65.4849	-145.416
AK2467	ARIZ:AK2467	AKE	North America	Rhizocarpon cf geographicum	Chlorolichen	65.4849	-145.416
AK2468	ARIZ:AK2468	AKE	North America	Rhizocarpon cf geographicum	Chlorolichen	65.4849	-145.416
AK2469	ARIZ:AK2469	AKE	North America	Rhizocarpon cf geographicum	Chlorolichen	65.4849	-145.416
AK2470	ARIZ:AK2470	AKE	North America	Rhizocarpon cf geographicum	Chlorolichen	65.4849	-145.416
AK2471	ARIZ:AK2471	AKE	North America	Rhizocarpon cf geographicum	Chlorolichen	65.4849	-145.416
AK2472	ARIZ:AK2472	AKE	North America	Rhizocarpon cf geographicum	Chlorolichen	65.4849	-145.416
AK2473	ARIZ:AK2473	AKE	North America	Rhizocarpon cf geographicum	Chlorolichen	65.4849	-145.416
AK2474	ARIZ:AK2474	AKE	North America	Rhizocarpon cf geographicum	Chlorolichen	65.4849	-145.416
AK2475	ARIZ:AK2475	AKE	North America	Rhizocarpon cf geographicum	Chlorolichen	65.4849	-145.416
AK2476	ARIZ:AK2476	AKE	North America	Rhizocarpon cf geographicum	Chlorolichen	65.4849	-145.416
AK2477	ARIZ:AK2477	AKE	North America	Rhizocarpon cf geographicum	Chlorolichen	65.4849	-145.416
AK2478	ARIZ:AK2478	AKE	North America	Rhizocarpon cf geographicum	Chlorolichen	65.4849	-145.416
AK2479	ARIZ:AK2479	AKE	North America	Rhizocarpon cf geographicum	Chlorolichen	65.4849	-145.416
AK2480	ARIZ:AK2480	AKE	North America	Rhizocarpon cf geographicum	Chlorolichen	65.4849	-145.416
AK2481	ARIZ:AK2481	AKE	North America	Rhizocarpon cf geographicum	Chlorolichen	65.4849	-145.416
AK2482	ARIZ:AK2482	AKE	North America	Rhizocarpon cf geographicum	Chlorolichen	65.4849	-145.416
AK2483	ARIZ:AK2483	AKE	North America	Rhizocarpon cf geographicum	Chlorolichen	65.4849	-145.416
AK2484	ARIZ:AK2484	AKE	North America	Rhizocarpon cf geographicum	Chlorolichen	65.4849	-145.416
AK2485	ARIZ:AK2485	AKE	North America	Rhizocarpon cf geographicum	Chlorolichen	65.4849	-145.416
AK2486	ARIZ:AK2486	AKE	North America	Rhizocarpon cf geographicum	Chlorolichen	65.4849	-145.416
AK2487	ARIZ:AK2487	AKE	North America	Rhizocarpon cf geographicum	Chlorolichen	65.4849	-145.416
AK2488	ARIZ:AK2488	AKE	North America	Rhizocarpon cf geographicum	Chlorolichen	65.4849	-145.416
AK2489	ARIZ:AK2489	AKE	North America	Rhizocarpon cf geographicum	Chlorolichen	65.4849	-145.416
AK2490	ARIZ:AK2490	AKE	North America	Rhizocarpon cf geographicum	Chlorolichen	65.4849	-145.416
AK2491	ARIZ:AK2491	AKE	North America	Rhizocarpon cf geographicum	Chlorolichen	65.4849	-145.416
AK2492	ARIZ:AK2492	AKE	North America	Rhizocarpon cf geographicum	Chlorolichen	65.4849	-145.416
AK2493	ARIZ:AK2493	AKE	North America	Rhizocarpon cf geographicum	Chlorolichen	65.4849	-145.416
AK2494	ARIZ:AK2494	AKE	North America	Rhizocarpon cf geographicum	Chlorolichen	65.4849	-145.416
AK2495	ARIZ:AK2495	AKE	North America	Rhizocarpon cf geographicum	Chlorolichen	65.4849	-145.416
AK2496	ARIZ:AK2496	AKE	North America	Rhizocarpon cf geographicum	Chlorolichen	65.4849	-145.416
AK2497	ARIZ:AK2497	AKE	North America	Rhizocarpon cf geographicum	Chlorolichen	65.4849	-145.416
AK2498	ARIZ:AK2498	AKE	North America	Rhizocarpon cf geographicum	Chlorolichen	65.4849	-145.416
AK2499	ARIZ:AK2499	AKE	North America	Rhizocarpon cf geographicum	Chlorolichen	65.4849	-145.416
AK2500	ARIZ:AK2500	AKE	North America	Rhizocarpon cf geographicum	Chlorolichen	65.4849	-145.416
AK2501	ARIZ:AK2501	AKE	North America	Rhizocarpon cf geographicum	Chlorolichen	65.4849	-145.416
AK2502	ARIZ:AK2502	AKE	North America	Rhizocarpon cf geographicum	Chlorolichen	65.4849	-145.416
AK2503	ARIZ:AK2503	AKE	North America	Rhizocarpon cf geographicum	Chlorolichen	65.4849	-145.416
AK2504	ARIZ:AK2504	AKE	North America	Rhizocarpon cf geographicum	Chlorolichen	65.4849	-145.416
AK2505	ARIZ:AK2505	AKE	North America	Rhizocarpon cf geographicum	Chlorolichen	65.4849	-145.416
AK2506	ARIZ:AK2506	AKE	North America	Rhizocarpon cf geographicum	Chlorolichen	65.4849	-145.416
AK2507	ARIZ:AK2507	AKE	North America	Rhizocarpon cf geographicum	Chlorolichen	65.4849	-145.416
AK2508	ARIZ:AK2508	AKE	North America	Rhizocarpon cf geographicum	Chlorolichen	65.4849	-145.416
AK2510	ARIZ:AK2510	AKE	North America	Rhizocarpon cf geographicum	Chlorolichen	65.4849	-145.416
AK2511	ARIZ:AK2511	AKE	North America	Rhizocarpon cf geographicum	Chlorolichen	65.4849	-145.416
AK2512	ARIZ:AK2512	AKE	North America	Rhizocarpon cf geographicum	Chlorolichen	65.4849	-145.416
AK2513	ARIZ:AK2513	AKE	North America	Rhizocarpon cf geographicum	Chlorolichen	65.4849	-145.416
AK2514	ARIZ:AK2514	AKE	North America	Rhizocarpon cf geographicum	Chlorolichen	65.4849	-145.416
AK2515	ARIZ:AK2515	AKE	North America	Rhizocarpon cf geographicum	Chlorolichen	65.4849	-145.416
AK2516	ARIZ:AK2516	AKE	North America	Rhizocarpon cf geographicum	Chlorolichen	65.4849	-145.416
AK2517	ARIZ:AK2517	AKE	North America	Rhizocarpon cf geographicum	Chlorolichen	65.4849	-145.416
AK2518	ARIZ:AK2518	AKE	North America	Rhizocarpon cf geographicum	Chlorolichen	65.4849	-145.416
AK2519	ARIZ:AK2519	AKE	North America	Rhizocarpon cf geographicum	Chlorolichen	65.4849	-145.416
AK2520	ARIZ:AK2520	AKE	North America	Umbilicaria hyperborea	Chlorolichen	65.4849	-145.416
AK2521	ARIZ:AK2521	AKE	North America	Umbilicaria hyperborea	Chlorolichen	65.4849	-145.416
AK2522	ARIZ:AK2522	AKE	North America	Umbilicaria hyperborea	Chlorolichen	65.4849	-145.416
AK2523	ARIZ:AK2523	AKE	North America	Umbilicaria hyperborea	Chlorolichen	65.4849	-145.416
AK2524	ARIZ:AK2524	AKE	North America	Umbilicaria hyperborea	Chlorolichen	65.4849	-145.416
AK2525	ARIZ:AK2525	AKE	North America	Umbilicaria hyperborea	Chlorolichen	65.4849	-145.416
AK2526	ARIZ:AK2526	AKE	North America	Umbilicaria hyperborea	Chlorolichen	65.4849	-145.416
AK2527	ARIZ:AK2527	AKE	North America	Umbilicaria hyperborea	Chlorolichen	65.4849	-145.416
AK2528	ARIZ:AK2528	AKE	North America	Umbilicaria hyperborea	Chlorolichen	65.4849	-145.416
AK2529	ARIZ:AK2529	AKE	North America	Umbilicaria hyperborea	Chlorolichen	65.4849	-145.416
AK2530	ARIZ:AK2530	AKE	North America	Umbilicaria hyperborea	Chlorolichen	65.4849	-145.416
AK2531	ARIZ:AK2531	AKE	North America	Umbilicaria hyperborea	Chlorolichen	65.4849	-145.416
AK2532	ARIZ:AK2532	AKE	North America	Umbilicaria hyperborea	Chlorolichen	65.4849	-145.416
AK2533	ARIZ:AK2533	AKE	North America	Umbilicaria hyperborea	Chlorolichen	65.4849	-145.416
AK2534A	ARIZ:AK2534A	AKE	North America	Umbilicaria hyperborea	Chlorolichen	65.4849	-145.416
AK2534B	ARIZ:AK2534B	AKE	North America	Umbilicaria hyperborea	Chlorolichen	65.4849	-145.416
AK2535	ARIZ:AK2535	AKE	North America	Umbilicaria hyperborea	Chlorolichen	65.4849	-145.416
AK2536	ARIZ:AK2536	AKE	North America	Umbilicaria hyperborea	Chlorolichen	65.4849	-145.416
AK2537	ARIZ:AK2537	AKE	North America	Umbilicaria hyperborea	Chlorolichen	65.4849	-145.416
AK2538	ARIZ:AK2538	AKE	North America	Umbilicaria hyperborea	Chlorolichen	65.4849	-145.416
AK2539	ARIZ:AK2539	AKE	North America	Umbilicaria hyperborea	Chlorolichen	65.4849	-145.416
AK2540	ARIZ:AK2540	AKE	North America	Umbilicaria hyperborea	Chlorolichen	65.4849	-145.416
AK2541	ARIZ:AK2541	AKE	North America	Umbilicaria hyperborea	Chlorolichen	65.4849	-145.416
AK2542	ARIZ:AK2542	AKE	North America	Umbilicaria hyperborea	Chlorolichen	65.4849	-145.416
AK2543	ARIZ:AK2543	AKE	North America	Umbilicaria hyperborea	Chlorolichen	65.4849	-145.416
AK2544	ARIZ:AK2544	AKE	North America	Umbilicaria hyperborea	Chlorolichen	65.4849	-145.416
AK2545	ARIZ:AK2545	AKE	North America	Umbilicaria hyperborea	Chlorolichen	65.4849	-145.416
AK2546	ARIZ:AK2546	AKE	North America	Umbilicaria hyperborea	Chlorolichen	65.4849	-145.416
AK2547	ARIZ:AK2547	AKE	North America	Umbilicaria hyperborea	Chlorolichen	65.4849	-145.416
AK2548	ARIZ:AK2548	AKE	North America	Umbilicaria hyperborea	Chlorolichen	65.4849	-145.416
AK2549	ARIZ:AK2549	AKE	North America	Umbilicaria hyperborea	Chlorolichen	65.4849	-145.416
AK2550	ARIZ:AK2550	AKE	North America	Umbilicaria hyperborea	Chlorolichen	65.4849	-145.416
AK2551	ARIZ:AK2551	AKE	North America	Umbilicaria hyperborea	Chlorolichen	65.4849	-145.416
AK2552	ARIZ:AK2552	AKE	North America	Umbilicaria hyperborea	Chlorolichen	65.4849	-145.416
AK2553	ARIZ:AK2553	AKE	North America	Umbilicaria hyperborea	Chlorolichen	65.4849	-145.416
AK2554	ARIZ:AK2554	AKE	North America	Umbilicaria hyperborea	Chlorolichen	65.4849	-145.416
AK2555	ARIZ:AK2555	AKE	North America	Umbilicaria hyperborea	Chlorolichen	65.4849	-145.416
AK2556	ARIZ:AK2556	AKE	North America	Umbilicaria hyperborea	Chlorolichen	65.4849	-145.416
AK2557	ARIZ:AK2557	AKE	North America	Umbilicaria hyperborea	Chlorolichen	65.4849	-145.416
AK2558	ARIZ:AK2558	AKE	North America	Umbilicaria hyperborea	Chlorolichen	65.4849	-145.416
AK2559	ARIZ:AK2559	AKE	North America	Umbilicaria hyperborea	Chlorolichen	65.4849	-145.416
AK2560	ARIZ:AK2560	AKE	North America	Umbilicaria hyperborea	Chlorolichen	65.4849	-145.416
AK2561	ARIZ:AK2561	AKE	North America	Umbilicaria hyperborea	Chlorolichen	65.4849	-145.416
AK2562	ARIZ:AK2562	AKE	North America	Umbilicaria hyperborea	Chlorolichen	65.4849	-145.416
AK2563	ARIZ:AK2563	AKE	North America	Umbilicaria hyperborea	Chlorolichen	65.4849	-145.416
AK2564	ARIZ:AK2564	AKE	North America	Umbilicaria hyperborea	Chlorolichen	65.4849	-145.416
AK2565	ARIZ:AK2565	AKE	North America	Umbilicaria hyperborea	Chlorolichen	65.4849	-145.416
AK2566	ARIZ:AK2566	AKE	North America	Umbilicaria hyperborea	Chlorolichen	65.4849	-145.416
AK2567	ARIZ:AK2567	AKE	North America	Umbilicaria hyperborea	Chlorolichen	65.4849	-145.416
AK2568	ARIZ:AK2568	AKE	North America	Umbilicaria hyperborea	Chlorolichen	65.4849	-145.416
AK2569	ARIZ:AK2569	AKE	North America	Umbilicaria hyperborea	Chlorolichen	65.4849	-145.416
AK2570	ARIZ:AK2570	AKE	North America	Umbilicaria hyperborea	Chlorolichen	65.4849	-145.416
AK2571	ARIZ:AK2571	AKE	North America	Umbilicaria hyperborea	Chlorolichen	65.4849	-145.416
AK2572	ARIZ:AK2572	AKE	North America	Umbilicaria hyperborea	Chlorolichen	65.4849	-145.416
AK2573	ARIZ:AK2573	AKE	North America	Umbilicaria hyperborea	Chlorolichen	65.4849	-145.416
AK2574	ARIZ:AK2574	AKE	North America	Umbilicaria hyperborea	Chlorolichen	65.4849	-145.416
AK2575	ARIZ:AK2575	AKE	North America	Umbilicaria hyperborea	Chlorolichen	65.4849	-145.416
AK2576	ARIZ:AK2576	AKE	North America	Umbilicaria hyperborea	Chlorolichen	65.4849	-145.416
AK2577	ARIZ:AK2577	AKE	North America	Umbilicaria hyperborea	Chlorolichen	65.4849	-145.416
AK2578	ARIZ:AK2578	AKE	North America	Umbilicaria hyperborea	Chlorolichen	65.4849	-145.416
AK2579	ARIZ:AK2579	AKE	North America	Umbilicaria hyperborea	Chlorolichen	65.4849	-145.416
AK2583	ARIZ:AK2583	AKE	North America	Umbilicaria hyperborea	Chlorolichen	65.4849	-145.416
AK2584	ARIZ:AK2584	AKE	North America	Umbilicaria hyperborea	Chlorolichen	65.4849	-145.416
AK2586	ARIZ:AK2586	AKE	North America	Umbilicaria hyperborea	Chlorolichen	65.4849	-145.416
AK2587	ARIZ:AK2587	AKE	North America	Umbilicaria hyperborea	Chlorolichen	65.4849	-145.416
AK2588	ARIZ:AK2588	AKE	North America	Umbilicaria hyperborea	Chlorolichen	65.4849	-145.416
AK2589	ARIZ:AK2589	AKE	North America	Umbilicaria hyperborea	Chlorolichen	65.4849	-145.416
AK2590	ARIZ:AK2590	AKE	North America	Umbilicaria hyperborea	Chlorolichen	65.4849	-145.416
AK2591	ARIZ:AK2591	AKE	North America	Umbilicaria hyperborea	Chlorolichen	65.4849	-145.416
AK2592	ARIZ:AK2592	AKE	North America	Umbilicaria hyperborea	Chlorolichen	65.4841	-145.417
AK2593	ARIZ:AK2593	AKE	North America	Umbilicaria hyperborea	Chlorolichen	65.4841	-145.417
AK2594	ARIZ:AK2594	AKE	North America	Umbilicaria hyperborea	Chlorolichen	65.4841	-145.417
AK2595	ARIZ:AK2595	AKE	North America	Umbilicaria hyperborea	Chlorolichen	65.4841	-145.417
AK2596	ARIZ:AK2596	AKE	North America	Umbilicaria hyperborea	Chlorolichen	65.4841	-145.417
AK2597	ARIZ:AK2597	AKE	North America	Umbilicaria hyperborea	Chlorolichen	65.4841	-145.417
AK2598	ARIZ:AK2598	AKE	North America	Umbilicaria hyperborea	Chlorolichen	65.4841	-145.417
AK2599	ARIZ:AK2599	AKE	North America	Umbilicaria hyperborea	Chlorolichen	65.4841	-145.417
AK2600	ARIZ:AK2600	AKE	North America	Umbilicaria hyperborea	Chlorolichen	65.4841	-145.417
AK2601	ARIZ:AK2601	AKE	North America	Umbilicaria hyperborea	Chlorolichen	65.4841	-145.417
AK2602	ARIZ:AK2602	AKE	North America	Umbilicaria hyperborea	Chlorolichen	65.4841	-145.417
AK2603	ARIZ:AK2603	AKE	North America	Umbilicaria hyperborea	Chlorolichen	65.4841	-145.417
AK2604	ARIZ:AK2604	AKE	North America	Umbilicaria hyperborea	Chlorolichen	65.4841	-145.417
AK2605	ARIZ:AK2605	AKE	North America	Umbilicaria hyperborea	Chlorolichen	65.4841	-145.417
AK2606	ARIZ:AK2606	AKE	North America	Umbilicaria hyperborea	Chlorolichen	65.4841	-145.417
AK2607	ARIZ:AK2607	AKE	North America	Umbilicaria hyperborea	Chlorolichen	65.4841	-145.417
AK2608	ARIZ:AK2608	AKE	North America	Umbilicaria hyperborea	Chlorolichen	65.4841	-145.417
AK2609	ARIZ:AK2609	AKE	North America	Umbilicaria hyperborea	Chlorolichen	65.4841	-145.417
AK2610	ARIZ:AK2610	AKE	North America	Umbilicaria hyperborea	Chlorolichen	65.4841	-145.417
AK2611	ARIZ:AK2611	AKE	North America	Umbilicaria hyperborea	Chlorolichen	65.4841	-145.417
AK2612	ARIZ:AK2612	AKE	North America	Umbilicaria hyperborea	Chlorolichen	65.4841	-145.417
AK2613	ARIZ:AK2613	AKE	North America	Umbilicaria hyperborea	Chlorolichen	65.4841	-145.417
AK2614	ARIZ:AK2614	AKE	North America	Umbilicaria hyperborea	Chlorolichen	65.4841	-145.417
AK2615	ARIZ:AK2615	AKE	North America	Umbilicaria hyperborea	Chlorolichen	65.4841	-145.417
AK2616	ARIZ:AK2616	AKE	North America	Umbilicaria hyperborea	Chlorolichen	65.4841	-145.417
AK2617	ARIZ:AK2617	AKE	North America	Umbilicaria hyperborea	Chlorolichen	65.4841	-145.417
AK2618	ARIZ:AK2618	AKE	North America	Umbilicaria hyperborea	Chlorolichen	65.4841	-145.417
AK2619	ARIZ:AK2619	AKE	North America	Umbilicaria hyperborea	Chlorolichen	65.4841	-145.417
AK2620	ARIZ:AK2620	AKE	North America	Umbilicaria hyperborea	Chlorolichen	65.4841	-145.417
AK2621	ARIZ:AK2621	AKE	North America	Umbilicaria hyperborea	Chlorolichen	65.4841	-145.417
AK2622	ARIZ:AK2622	AKE	North America	Umbilicaria hyperborea	Chlorolichen	65.4841	-145.417
AK2623	ARIZ:AK2623	AKE	North America	Umbilicaria hyperborea	Chlorolichen	65.4841	-145.417
AK2625	ARIZ:AK2625	AKE	North America	Umbilicaria hyperborea	Chlorolichen	65.4841	-145.417
AK2626	ARIZ:AK2626	AKE	North America	Umbilicaria hyperborea	Chlorolichen	65.4841	-145.417
AK2627	ARIZ:AK2627	AKE	North America	Umbilicaria hyperborea	Chlorolichen	65.4841	-145.417
AK2628	ARIZ:AK2628	AKE	North America	Umbilicaria hyperborea	Chlorolichen	65.4841	-145.417
AK2629	ARIZ:AK2629	AKE	North America	Umbilicaria hyperborea	Chlorolichen	65.4841	-145.417
AK2630	ARIZ:AK2630	AKE	North America	Umbilicaria hyperborea	Chlorolichen	65.4841	-145.417
AK2631	ARIZ:AK2631	AKE	North America	Umbilicaria hyperborea	Chlorolichen	65.4841	-145.417
AK2632	ARIZ:AK2632	AKE	North America	Umbilicaria hyperborea	Chlorolichen	65.4841	-145.417
AK2633	ARIZ:AK2633	AKE	North America	Umbilicaria hyperborea	Chlorolichen	65.4841	-145.417
AK2634	ARIZ:AK2634	AKE	North America	Umbilicaria hyperborea	Chlorolichen	65.4841	-145.417
AK2635	ARIZ:AK2635	AKE	North America	Umbilicaria hyperborea	Chlorolichen	65.4841	-145.417
AK2636	ARIZ:AK2636	AKE	North America	Umbilicaria hyperborea	Chlorolichen	65.4841	-145.417
AK2637	ARIZ:AK2637	AKE	North America	Umbilicaria hyperborea	Chlorolichen	65.4841	-145.417
AK2638	ARIZ:AK2638	AKE	North America	Dactylina arctica	Chlorolichen	65.4841	-145.417
AK2639	ARIZ:AK2639	AKE	North America	Dactylina arctica	Chlorolichen	65.4842	-145.414
AK2643	ARIZ:AK2643	AKE	North America	Dactylina arctica	Chlorolichen	65.4842	-145.414
AK2646	ARIZ:AK2646	AKE	North America	Dactylina arctica	Chlorolichen	65.4842	-145.414
AK2648	ARIZ:AK2648	AKE	North America	Dactylina arctica	Chlorolichen	65.4842	-145.414
AK2650	ARIZ:AK2650	AKE	North America	Dactylina arctica	Chlorolichen	65.4842	-145.414
AK2652	ARIZ:AK2652	AKE	North America	Dactylina arctica	Chlorolichen	65.4842	-145.414
AK2653	ARIZ:AK2653	AKE	North America	Dactylina arctica	Chlorolichen	65.4842	-145.414
AK2655	ARIZ:AK2655	AKE	North America	Dactylina arctica	Chlorolichen	65.4842	-145.414
AK2659	ARIZ:AK2659	AKE	North America	Dactylina arctica	Chlorolichen	65.4842	-145.414
AK2667	ARIZ:AK2667	AKE	North America	Dactylina arctica	Chlorolichen	65.4842	-145.414
AK2675	ARIZ:AK2675	AKE	North America	Dactylina arctica	Chlorolichen	65.4842	-145.414
AK2676	ARIZ:AK2676	AKE	North America	Dactylina arctica	Chlorolichen	65.4849	-145.416
AK2677	ARIZ:AK2677	AKE	North America	Dactylina arctica	Chlorolichen	65.4849	-145.416
AK2678	ARIZ:AK2678	AKE	North America	Dactylina arctica	Chlorolichen	65.4849	-145.416
AK2679	ARIZ:AK2679	AKE	North America	Dactylina arctica	Chlorolichen	65.4849	-145.416
AK2680	ARIZ:AK2680	AKE	North America	Dactylina arctica	Chlorolichen	65.4849	-145.416
AK2681	ARIZ:AK2681	AKE	North America	Dactylina arctica	Chlorolichen	65.4849	-145.416
AK2682	ARIZ:AK2682	AKE	North America	Dactylina arctica	Chlorolichen	65.4849	-145.416
AK2683	ARIZ:AK2683	AKE	North America	Dactylina arctica	Chlorolichen	65.4849	-145.416
AK2684	ARIZ:AK2684	AKE	North America	Dactylina arctica	Chlorolichen	65.4849	-145.416
AK2685	ARIZ:AK2685	AKE	North America	Dactylina arctica	Chlorolichen	65.4849	-145.416
AK2686	ARIZ:AK2686	AKE	North America	Dactylina arctica	Chlorolichen	65.4849	-145.416
AK2687	ARIZ:AK2687	AKE	North America	Dactylina arctica	Chlorolichen	65.4849	-145.416
AK2688	ARIZ:AK2688	AKE	North America	Dactylina arctica	Chlorolichen	65.4849	-145.416
AK2690	ARIZ:AK2690	AKE	North America	Cladonia rangiferina	Chlorolichen	65.4842	-145.414
AK2691	ARIZ:AK2691	AKE	North America	Cladonia rangiferina	Chlorolichen	65.4842	-145.414
AK2693	ARIZ:AK2693	AKE	North America	Cladonia rangiferina	Chlorolichen	65.4842	-145.414
AK2695	ARIZ:AK2695	AKE	North America	Cladonia rangiferina	Chlorolichen	65.4842	-145.414
AK2696	ARIZ:AK2696	AKE	North America	Cladonia rangiferina	Chlorolichen	65.4842	-145.414
AK2697	ARIZ:AK2697	AKE	North America	Cladonia rangiferina	Chlorolichen	65.4842	-145.414
AK2698	ARIZ:AK2698	AKE	North America	Cladonia rangiferina	Chlorolichen	65.4842	-145.414
AK2699	ARIZ:AK2699	AKE	North America	Cladonia rangiferina	Chlorolichen	65.4842	-145.414
AK2700	ARIZ:AK2700	AKE	North America	Cladonia rangiferina	Chlorolichen	65.4842	-145.414
AK2701	ARIZ:AK2701	AKE	North America	Cladonia rangiferina	Chlorolichen	65.4842	-145.414
AK2702	ARIZ:AK2702	AKE	North America	Cladonia rangiferina	Chlorolichen	65.4842	-145.414
AK2703	ARIZ:AK2703	AKE	North America	Cladonia rangiferina	Chlorolichen	65.4842	-145.414
AK2704	ARIZ:AK2704	AKE	North America	Cladonia rangiferina	Chlorolichen	65.4842	-145.414
AK2705	ARIZ:AK2705	AKE	North America	Cladonia rangiferina	Chlorolichen	65.4842	-145.414
AK2706	ARIZ:AK2706	AKE	North America	Cladonia rangiferina	Chlorolichen	65.4842	-145.414
AK2708	ARIZ:AK2708	AKE	North America	Cladonia rangiferina	Chlorolichen	65.4842	-145.414
AK2709	ARIZ:AK2709	AKE	North America	Cladonia rangiferina	Chlorolichen	65.4842	-145.414
AK2710	ARIZ:AK2710	AKE	North America	Cladonia rangiferina	Chlorolichen	65.4842	-145.414
AK2711	ARIZ:AK2711	AKE	North America	Cladonia rangiferina	Chlorolichen	65.4842	-145.414
AK2712	ARIZ:AK2712	AKE	North America	Cladonia rangiferina	Chlorolichen	65.4842	-145.414
AK2713	ARIZ:AK2713	AKE	North America	Cladonia rangiferina	Chlorolichen	65.4842	-145.414
AK2715	ARIZ:AK2715	AKE	North America	Cladonia rangiferina	Chlorolichen	65.4842	-145.414
AK2716	ARIZ:AK2716	AKE	North America	Cladonia rangiferina	Chlorolichen	65.4842	-145.414
AK2717	ARIZ:AK2717	AKE	North America	Cladonia rangiferina	Chlorolichen	65.4842	-145.414
AK2718	ARIZ:AK2718	AKE	North America	Cladonia rangiferina	Chlorolichen	65.4842	-145.414
AK2719	ARIZ:AK2719	AKE	North America	Cladonia rangiferina	Chlorolichen	65.4842	-145.414
AK2720	ARIZ:AK2720	AKE	North America	Cladonia rangiferina	Chlorolichen	65.4842	-145.414
AK2721	ARIZ:AK2721	AKE	North America	Cladonia rangiferina	Chlorolichen	65.4842	-145.414
AK2722	ARIZ:AK2722	AKE	North America	Cladonia rangiferina	Chlorolichen	65.4842	-145.414
AK2723	ARIZ:AK2723	AKE	North America	Cladonia rangiferina	Chlorolichen	65.4842	-145.414
AK2724	ARIZ:AK2724	AKE	North America	Cladonia rangiferina	Chlorolichen	65.4842	-145.414
AK2725	ARIZ:AK2725	AKE	North America	Cladonia rangiferina	Chlorolichen	65.4842	-145.414
AK2726	ARIZ:AK2726	AKE	North America	Cladonia rangiferina	Chlorolichen	65.4842	-145.414
AK2727	ARIZ:AK2727	AKE	North America	Cladonia rangiferina	Chlorolichen	65.4842	-145.414
AK2728	ARIZ:AK2728	AKE	North America	Cladonia rangiferina	Chlorolichen	65.4842	-145.414
AK2729	ARIZ:AK2729	AKE	North America	Cladonia rangiferina	Chlorolichen	65.4842	-145.414
AK2730	ARIZ:AK2730	AKE	North America	Cladonia rangiferina	Chlorolichen	65.4842	-145.414
AK2731	ARIZ:AK2731	AKE	North America	Cladonia rangiferina	Chlorolichen	65.4842	-145.414
AK2732	ARIZ:AK2732	AKE	North America	Cladonia rangiferina	Chlorolichen	65.4842	-145.414
AK2733	ARIZ:AK2733	AKE	North America	Cladonia rangiferina	Chlorolichen	65.4842	-145.414
AK2734	ARIZ:AK2734	AKE	North America	Cladonia rangiferina	Chlorolichen	65.4842	-145.414
AK2735	ARIZ:AK2735	AKE	North America	Cladonia rangiferina	Chlorolichen	65.4842	-145.414
AK2736	ARIZ:AK2736	AKE	North America	Cladonia rangiferina	Chlorolichen	65.4842	-145.414
AK2737	ARIZ:AK2737	AKE	North America	Cladonia rangiferina	Chlorolichen	65.4842	-145.414
AK2738	ARIZ:AK2738	AKE	North America	Cladonia rangiferina	Chlorolichen	65.4842	-145.414
AK2739	ARIZ:AK2739	AKE	North America	Cladonia rangiferina	Chlorolichen	65.4842	-145.414
AK2740	ARIZ:AK2740	AKE	North America	Cladonia rangiferina	Chlorolichen	65.4842	-145.414
AK2741	ARIZ:AK2741	AKE	North America	Cladonia rangiferina	Chlorolichen	65.4842	-145.414
AK2742	ARIZ:AK2742	AKE	North America	Cladonia rangiferina	Chlorolichen	65.4842	-145.414
AK2743	ARIZ:AK2743	AKE	North America	Cladonia rangiferina	Chlorolichen	65.4842	-145.414
AK2744	ARIZ:AK2744	AKE	North America	Cladonia rangiferina	Chlorolichen	65.4842	-145.414
AK2745	ARIZ:AK2745	AKE	North America	Cladonia rangiferina	Chlorolichen	65.4842	-145.414
AK2746	ARIZ:AK2746	AKE	North America	Cladonia rangiferina	Chlorolichen	65.4842	-145.414
AK2747	ARIZ:AK2747	AKE	North America	Cladonia rangiferina	Chlorolichen	65.4842	-145.414
AK2748	ARIZ:AK2748	AKE	North America	Cladonia rangiferina	Chlorolichen	65.4842	-145.414
AK2749	ARIZ:AK2749	AKE	North America	Cladonia rangiferina	Chlorolichen	65.4842	-145.414
AK2750	ARIZ:AK2750	AKE	North America	Cladonia rangiferina	Chlorolichen	65.4842	-145.414
AK2751	ARIZ:AK2751	AKE	North America	Cladonia rangiferina	Chlorolichen	65.4842	-145.414
AK2752	ARIZ:AK2752	AKE	North America	Cladonia rangiferina	Chlorolichen	65.4842	-145.414
AK2755	ARIZ:AK2755	AKE	North America	Cladonia rangiferina	Chlorolichen	65.4842	-145.414
AK2756	ARIZ:AK2756	AKE	North America	Cladonia rangiferina	Chlorolichen	65.4842	-145.414
AK2757	ARIZ:AK2757	AKE	North America	Cladonia rangiferina	Chlorolichen	65.4842	-145.414
AK2758	ARIZ:AK2758	AKE	North America	Cladonia rangiferina	Chlorolichen	65.4842	-145.414
AK2760	ARIZ:AK2760	AKE	North America	Cladonia rangiferina	Chlorolichen	65.4842	-145.414
AK2761	ARIZ:AK2761	AKE	North America	Cladonia rangiferina	Chlorolichen	65.4842	-145.414
AK2763	ARIZ:AK2763	AKE	North America	Cladonia rangiferina	Chlorolichen	65.4842	-145.414
AK2764	ARIZ:AK2764	AKE	North America	Cladonia rangiferina	Chlorolichen	65.4842	-145.414
AK2765	ARIZ:AK2765	AKE	North America	Cladonia rangiferina	Chlorolichen	65.4842	-145.414
AK2766	ARIZ:AK2766	AKE	North America	Cladonia rangiferina	Chlorolichen	65.4842	-145.414
AK2767	ARIZ:AK2767	AKE	North America	Cladonia rangiferina	Chlorolichen	65.4842	-145.414
AK2768	ARIZ:AK2768	AKE	North America	Cladonia rangiferina	Chlorolichen	65.4842	-145.414
AK2769	ARIZ:AK2769	AKE	North America	Cladonia rangiferina	Chlorolichen	65.4842	-145.414
AK2771	ARIZ:AK2771	AKE	North America	Cladonia rangiferina	Chlorolichen	65.4842	-145.414
AK2772	ARIZ:AK2772	AKE	North America	Cladonia rangiferina	Chlorolichen	65.4842	-145.414
AK2773	ARIZ:AK2773	AKE	North America	Cladonia rangiferina	Chlorolichen	65.4842	-145.414
AK2775	ARIZ:AK2775	AKE	North America	Cladonia rangiferina	Chlorolichen	65.4842	-145.414
AK2776	ARIZ:AK2776	AKE	North America	Cladonia rangiferina	Chlorolichen	65.4842	-145.414
AK2777	ARIZ:AK2777	AKE	North America	Cladonia rangiferina	Chlorolichen	65.4842	-145.414
AK2779	ARIZ:AK2779	AKE	North America	Cladonia rangiferina	Chlorolichen	65.4842	-145.414
AK2780	ARIZ:AK2780	AKE	North America	Cladonia rangiferina	Chlorolichen	65.4842	-145.414
AK2781	ARIZ:AK2781	AKE	North America	Cladonia rangiferina	Chlorolichen	65.4842	-145.414
AK2782	ARIZ:AK2782	AKE	North America	Cladonia rangiferina	Chlorolichen	65.4842	-145.414
AK2783	ARIZ:AK2783	AKE	North America	Ophioparma ventosa	Chlorolichen	65.4842	-145.414
AK2784	ARIZ:AK2784	AKE	North America	Ophioparma ventosa	Chlorolichen	65.4842	-145.414
AK2786	ARIZ:AK2786	AKE	North America	Ophioparma ventosa	Chlorolichen	65.4842	-145.414
AK2787	ARIZ:AK2787	AKE	North America	Ophioparma ventosa	Chlorolichen	65.4842	-145.414
AK2788	ARIZ:AK2788	AKE	North America	Ophioparma ventosa	Chlorolichen	65.4842	-145.414
AK2789	ARIZ:AK2789	AKE	North America	Ophioparma ventosa	Chlorolichen	65.4842	-145.414
AK2790	ARIZ:AK2790	AKE	North America	Ophioparma ventosa	Chlorolichen	65.4842	-145.414
AK2791	ARIZ:AK2791	AKE	North America	Ophioparma ventosa	Chlorolichen	65.4842	-145.414
AK2792	ARIZ:AK2792	AKE	North America	Ophioparma ventosa	Chlorolichen	65.4842	-145.414
AK2793	ARIZ:AK2793	AKE	North America	Ophioparma ventosa	Chlorolichen	65.4842	-145.414
AK2794	ARIZ:AK2794	AKE	North America	Ophioparma ventosa	Chlorolichen	65.4842	-145.414
AK2795	ARIZ:AK2795	AKE	North America	Ophioparma ventosa	Chlorolichen	65.4842	-145.414
AK2796	ARIZ:AK2796	AKE	North America	Ophioparma ventosa	Chlorolichen	65.4842	-145.414
AK2797	ARIZ:AK2797	AKE	North America	Ophioparma ventosa	Chlorolichen	65.4842	-145.414
AK2798	ARIZ:AK2798	AKE	North America	Ophioparma ventosa	Chlorolichen	65.4842	-145.414
AK2800	ARIZ:AK2800	AKE	North America	Ophioparma ventosa	Chlorolichen	65.4842	-145.414
AK2801	ARIZ:AK2801	AKE	North America	Ophioparma ventosa	Chlorolichen	65.4842	-145.414
AK2802	ARIZ:AK2802	AKE	North America	Ophioparma ventosa	Chlorolichen	65.4842	-145.414
AK2803	ARIZ:AK2803	AKE	North America	Ophioparma ventosa	Chlorolichen	65.4842	-145.414
AK2804	ARIZ:AK2804	AKE	North America	Ophioparma ventosa	Chlorolichen	65.4842	-145.414
AK2805	ARIZ:AK2805	AKE	North America	Ophioparma ventosa	Chlorolichen	65.4842	-145.414
AK2807	ARIZ:AK2807	AKE	North America	Ophioparma ventosa	Chlorolichen	65.4842	-145.414
AK2808	ARIZ:AK2808	AKE	North America	Ophioparma ventosa	Chlorolichen	65.4842	-145.414
AK2810	ARIZ:AK2810	AKE	North America	Ophioparma ventosa	Chlorolichen	65.4842	-145.414
AK2811	ARIZ:AK2811	AKE	North America	Ophioparma ventosa	Chlorolichen	65.4842	-145.414
AK2812	ARIZ:AK2812	AKE	North America	Ophioparma ventosa	Chlorolichen	65.4842	-145.414
AK2813	ARIZ:AK2813	AKE	North America	Ophioparma ventosa	Chlorolichen	65.4842	-145.414
AK2814	ARIZ:AK2814	AKE	North America	Ophioparma ventosa	Chlorolichen	65.4842	-145.414
AK2815	ARIZ:AK2815	AKE	North America	Ophioparma ventosa	Chlorolichen	65.4842	-145.414
AK2816	ARIZ:AK2816	AKE	North America	Ophioparma ventosa	Chlorolichen	65.4842	-145.414
AK2817	ARIZ:AK2817	AKE	North America	Ophioparma ventosa	Chlorolichen	65.4842	-145.414
AK2818	ARIZ:AK2818	AKE	North America	Ophioparma ventosa	Chlorolichen	65.4842	-145.414
AK2819	ARIZ:AK2819	AKE	North America	Ophioparma ventosa	Chlorolichen	65.4842	-145.414
AK2820	ARIZ:AK2820	AKE	North America	Ophioparma ventosa	Chlorolichen	65.4842	-145.414
AK2821	ARIZ:AK2821	AKE	North America	Ophioparma ventosa	Chlorolichen	65.4842	-145.414
AK2822	ARIZ:AK2822	AKE	North America	Ophioparma ventosa	Chlorolichen	65.4842	-145.414
AK2823	ARIZ:AK2823	AKE	North America	Ophioparma ventosa	Chlorolichen	65.4842	-145.414
AK2824	ARIZ:AK2824	AKE	North America	Ophioparma ventosa	Chlorolichen	65.4842	-145.414
AK2825	ARIZ:AK2825	AKE	North America	Ophioparma ventosa	Chlorolichen	65.4842	-145.414
AK2826	ARIZ:AK2826	AKE	North America	Ophioparma ventosa	Chlorolichen	65.4842	-145.414
AK2827	ARIZ:AK2827	AKE	North America	Ophioparma ventosa	Chlorolichen	65.4842	-145.414
AK2828	ARIZ:AK2828	AKE	North America	Ophioparma ventosa	Chlorolichen	65.4842	-145.414
AK2829	ARIZ:AK2829	AKE	North America	Ophioparma ventosa	Chlorolichen	65.4842	-145.414
AK2830	ARIZ:AK2830	AKE	North America	Ophioparma ventosa	Chlorolichen	65.4842	-145.414
AK2831	ARIZ:AK2831	AKE	North America	Ophioparma ventosa	Chlorolichen	65.4842	-145.414
AK2832	ARIZ:AK2832	AKE	North America	Ophioparma ventosa	Chlorolichen	65.4842	-145.414
AK2833	ARIZ:AK2833	AKE	North America	Ophioparma ventosa	Chlorolichen	65.4842	-145.414
AK2834	ARIZ:AK2834	AKE	North America	Ophioparma ventosa	Chlorolichen	65.4842	-145.414
AK2835	ARIZ:AK2835	AKE	North America	Ophioparma ventosa	Chlorolichen	65.4842	-145.414
AK2836	ARIZ:AK2836	AKE	North America	Ophioparma ventosa	Chlorolichen	65.4842	-145.414
AK2838	ARIZ:AK2838	AKE	North America	Ophioparma ventosa	Chlorolichen	65.4842	-145.414
AK2839	ARIZ:AK2839	AKE	North America	Ophioparma ventosa	Chlorolichen	65.4842	-145.414
AK2840	ARIZ:AK2840	AKE	North America	Ophioparma ventosa	Chlorolichen	65.4842	-145.414
AK2841	ARIZ:AK2841	AKE	North America	Ophioparma ventosa	Chlorolichen	65.4842	-145.414
AK2842	ARIZ:AK2842	AKE	North America	Ophioparma ventosa	Chlorolichen	65.4842	-145.414
AK2843	ARIZ:AK2843	AKE	North America	Ophioparma ventosa	Chlorolichen	65.4842	-145.414
AK2845	ARIZ:AK2845	AKE	North America	Ophioparma ventosa	Chlorolichen	65.4842	-145.414
AK2846	ARIZ:AK2846	AKE	North America	Ophioparma ventosa	Chlorolichen	65.4842	-145.414
AK2847	ARIZ:AK2847	AKE	North America	Ophioparma ventosa	Chlorolichen	65.4842	-145.414
AK2848	ARIZ:AK2848	AKE	North America	Ophioparma ventosa	Chlorolichen	65.4842	-145.414
AK2849	ARIZ:AK2849	AKE	North America	Ophioparma ventosa	Chlorolichen	65.4842	-145.414
AK2850	ARIZ:AK2850	AKE	North America	Ophioparma ventosa	Chlorolichen	65.4842	-145.414
AK2851	ARIZ:AK2851	AKE	North America	Ophioparma ventosa	Chlorolichen	65.4842	-145.414
AK2852	ARIZ:AK2852	AKE	North America	Ophioparma ventosa	Chlorolichen	65.4842	-145.414
AK2853	ARIZ:AK2853	AKE	North America	Ophioparma ventosa	Chlorolichen	65.4842	-145.414
AK2854	ARIZ:AK2854	AKE	North America	Ophioparma ventosa	Chlorolichen	65.4842	-145.414
AK2856	ARIZ:AK2856	AKE	North America	Ophioparma ventosa	Chlorolichen	65.4842	-145.414
AK2857	ARIZ:AK2857	AKE	North America	Ophioparma ventosa	Chlorolichen	65.4842	-145.414
AK2858	ARIZ:AK2858	AKE	North America	Ophioparma ventosa	Chlorolichen	65.4842	-145.414
AK2859	ARIZ:AK2859	AKE	North America	Ophioparma ventosa	Chlorolichen	65.4842	-145.414
AK2860	ARIZ:AK2860	AKE	North America	Ophioparma ventosa	Chlorolichen	65.4842	-145.414
AK2861	ARIZ:AK2861	AKE	North America	Ophioparma ventosa	Chlorolichen	65.4842	-145.414
AK2862	ARIZ:AK2862	AKE	North America	Ophioparma ventosa	Chlorolichen	65.4842	-145.414
AK2863	ARIZ:AK2863	AKE	North America	Ophioparma ventosa	Chlorolichen	65.4842	-145.414
AK2864	ARIZ:AK2864	AKE	North America	Ophioparma ventosa	Chlorolichen	65.4842	-145.414
AK2865	ARIZ:AK2865	AKE	North America	Ophioparma ventosa	Chlorolichen	65.4842	-145.414
AK2866	ARIZ:AK2866	AKE	North America	Ophioparma ventosa	Chlorolichen	65.4842	-145.414
AK2867	ARIZ:AK2867	AKE	North America	Ophioparma ventosa	Chlorolichen	65.4842	-145.414
AK2868	ARIZ:AK2868	AKE	North America	Ophioparma ventosa	Chlorolichen	65.4842	-145.414
AK2869	ARIZ:AK2869	AKE	North America	Ophioparma ventosa	Chlorolichen	65.4842	-145.414
AK2870	ARIZ:AK2870	AKE	North America	Ophioparma ventosa	Chlorolichen	65.4842	-145.414
AK2871	ARIZ:AK2871	AKE	North America	Ophioparma ventosa	Chlorolichen	65.4842	-145.414
AK2872	ARIZ:AK2872	AKE	North America	Ophioparma ventosa	Chlorolichen	65.4842	-145.414
AK2873	ARIZ:AK2873	AKE	North America	Ophioparma ventosa	Chlorolichen	65.4842	-145.414
AK2874	ARIZ:AK2874	AKE	North America	Ophioparma ventosa	Chlorolichen	65.4842	-145.414
AK2875	ARIZ:AK2875	AKE	North America	Ophioparma ventosa	Chlorolichen	65.4842	-145.414
AK2876	ARIZ:AK2876	AKE	North America	Ophioparma ventosa	Chlorolichen	65.4842	-145.414
AK2877	ARIZ:AK2877	AKE	North America	Ophioparma ventosa	Chlorolichen	65.4842	-145.414
AK2878	ARIZ:AK2878	AKE	North America	Ophioparma ventosa	Chlorolichen	65.4842	-145.414
AK2879	ARIZ:AK2879	AKE	North America	Ophioparma ventosa	Chlorolichen	65.4841	-145.417
AK2880	ARIZ:AK2880	AKE	North America	Ophioparma ventosa	Chlorolichen	65.4841	-145.417
AK2881	ARIZ:AK2881	AKE	North America	Ophioparma ventosa	Chlorolichen	65.4841	-145.417
AK2882	ARIZ:AK2882	AKE	North America	Ophioparma ventosa	Chlorolichen	65.4841	-145.417
AK2883	ARIZ:AK2883	AKE	North America	Ophioparma ventosa	Chlorolichen	65.4841	-145.417
AK2884	ARIZ:AK2884	AKE	North America	Ophioparma ventosa	Chlorolichen	65.4841	-145.417
AK2885	ARIZ:AK2885	AKE	North America	Ophioparma ventosa	Chlorolichen	65.4841	-145.417
AK2886	ARIZ:AK2886	AKE	North America	Ophioparma ventosa	Chlorolichen	65.4841	-145.417
AK2887	ARIZ:AK2887	AKE	North America	Ophioparma ventosa	Chlorolichen	65.4841	-145.417
AK2888	ARIZ:AK2888	AKE	North America	Ophioparma ventosa	Chlorolichen	65.4841	-145.417
AK2889	ARIZ:AK2889	AKE	North America	Ophioparma ventosa	Chlorolichen	65.4841	-145.417
AK2890	ARIZ:AK2890	AKE	North America	Ophioparma ventosa	Chlorolichen	65.4841	-145.417
AK2891	ARIZ:AK2891	AKE	North America	Ophioparma ventosa	Chlorolichen	65.4841	-145.417
AK2892	ARIZ:AK2892	AKE	North America	Ophioparma ventosa	Chlorolichen	65.4841	-145.417
AK2894	ARIZ:AK2894	AKE	North America	Ophioparma ventosa	Chlorolichen	65.4841	-145.417
AK2895	ARIZ:AK2895	AKE	North America	Ophioparma ventosa	Chlorolichen	65.4841	-145.417
AK2897	ARIZ:AK2897	AKE	North America	Ophioparma ventosa	Chlorolichen	65.4841	-145.417
AK2898	ARIZ:AK2898	AKE	North America	Ophioparma ventosa	Chlorolichen	65.4841	-145.417
AK2899	ARIZ:AK2899	AKE	North America	Ophioparma ventosa	Chlorolichen	65.4841	-145.417
AK2900	ARIZ:AK2900	AKE	North America	Ophioparma ventosa	Chlorolichen	65.4841	-145.417
AK2901	ARIZ:AK2901	AKE	North America	Ophioparma ventosa	Chlorolichen	65.4841	-145.417
AK2902	ARIZ:AK2902	AKE	North America	Ophioparma ventosa	Chlorolichen	65.4841	-145.417
AK2903	ARIZ:AK2903	AKE	North America	Ophioparma ventosa	Chlorolichen	65.4841	-145.417
AK2904	ARIZ:AK2904	AKE	North America	Ophioparma ventosa	Chlorolichen	65.4841	-145.417
AK2905	ARIZ:AK2905	AKE	North America	Ophioparma ventosa	Chlorolichen	65.4841	-145.417
AK2906	ARIZ:AK2906	AKE	North America	Ophioparma ventosa	Chlorolichen	65.4841	-145.417
AK2907	ARIZ:AK2907	AKE	North America	Ophioparma ventosa	Chlorolichen	65.4841	-145.417
AK2908	ARIZ:AK2908	AKE	North America	Ophioparma ventosa	Chlorolichen	65.4841	-145.417
AK2909	ARIZ:AK2909	AKE	North America	Ophioparma ventosa	Chlorolichen	65.4841	-145.417
AK2910	ARIZ:AK2910	AKE	North America	Ophioparma ventosa	Chlorolichen	65.4841	-145.417
AK2911	ARIZ:AK2911	AKE	North America	Ophioparma ventosa	Chlorolichen	65.4841	-145.417
AK2912	ARIZ:AK2912	AKE	North America	Ophioparma ventosa	Chlorolichen	65.4841	-145.417
AK2913	ARIZ:AK2913	AKE	North America	Ophioparma ventosa	Chlorolichen	65.4841	-145.417
AK2914	ARIZ:AK2914	AKE	North America	Ophioparma ventosa	Chlorolichen	65.4841	-145.417
AK2915	ARIZ:AK2915	AKE	North America	Ophioparma ventosa	Chlorolichen	65.4841	-145.417
AK2916	ARIZ:AK2916	AKE	North America	Ophioparma ventosa	Chlorolichen	65.4841	-145.417
AK2917	ARIZ:AK2917	AKE	North America	Ophioparma ventosa	Chlorolichen	65.4841	-145.417
AK2918	ARIZ:AK2918	AKE	North America	Ophioparma ventosa	Chlorolichen	65.4841	-145.417
AK2919	ARIZ:AK2919	AKE	North America	Ophioparma ventosa	Chlorolichen	65.4841	-145.417
AK2920	ARIZ:AK2920	AKE	North America	Ophioparma ventosa	Chlorolichen	65.4841	-145.417
AK2921	ARIZ:AK2921	AKE	North America	Ophioparma ventosa	Chlorolichen	65.4841	-145.417
AK2922	ARIZ:AK2922	AKE	North America	Ophioparma ventosa	Chlorolichen	65.4841	-145.417
AK2923	ARIZ:AK2923	AKE	North America	Ophioparma ventosa	Chlorolichen	65.4841	-145.417
AK2924	ARIZ:AK2924	AKE	North America	Ophioparma ventosa	Chlorolichen	65.4841	-145.417
AK2925	ARIZ:AK2925	AKE	North America	Ophioparma ventosa	Chlorolichen	65.4841	-145.417
AK2926	ARIZ:AK2926	AKE	North America	Ophioparma ventosa	Chlorolichen	65.4841	-145.417
AK2927	ARIZ:AK2927	AKE	North America	Ophioparma ventosa	Chlorolichen	65.4841	-145.417
AK2928	ARIZ:AK2928	AKE	North America	Ophioparma ventosa	Chlorolichen	65.4841	-145.417
AK2929	ARIZ:AK2929	AKE	North America	Ophioparma ventosa	Chlorolichen	65.4841	-145.417
AK2930	ARIZ:AK2930	AKE	North America	Ophioparma ventosa	Chlorolichen	65.4841	-145.417
AK2931	ARIZ:AK2931	AKE	North America	Ophioparma ventosa	Chlorolichen	65.4841	-145.417
AK2932	ARIZ:AK2932	AKE	North America	Ophioparma ventosa	Chlorolichen	65.4841	-145.417
AK2933	ARIZ:AK2933	AKE	North America	Ophioparma ventosa	Chlorolichen	65.4841	-145.417
AK2934	ARIZ:AK2934	AKE	North America	Ophioparma ventosa	Chlorolichen	65.4841	-145.417
AK2935	ARIZ:AK2935	AKE	North America	Ophioparma ventosa	Chlorolichen	65.4841	-145.417
AK2936	ARIZ:AK2936	AKE	North America	Ophioparma ventosa	Chlorolichen	65.4841	-145.417
AK2937	ARIZ:AK2937	AKE	North America	Ophioparma ventosa	Chlorolichen	65.4841	-145.417
AK2938	ARIZ:AK2938	AKE	North America	Ophioparma ventosa	Chlorolichen	65.4841	-145.417
AK2939	ARIZ:AK2939	AKE	North America	Ophioparma ventosa	Chlorolichen	65.4841	-145.417
AK2940	ARIZ:AK2940	AKE	North America	Ophioparma ventosa	Chlorolichen	65.4841	-145.417
AK2941	ARIZ:AK2941	AKE	North America	Ophioparma ventosa	Chlorolichen	65.4841	-145.417
AK2942	ARIZ:AK2942	AKE	North America	Ophioparma ventosa	Chlorolichen	65.4841	-145.417
AK2943	ARIZ:AK2943	AKE	North America	Ophioparma ventosa	Chlorolichen	65.4841	-145.417
AK2944	ARIZ:AK2944	AKE	North America	Ophioparma ventosa	Chlorolichen	65.4841	-145.417
AK2945	ARIZ:AK2945	AKE	North America	Ophioparma ventosa	Chlorolichen	65.4841	-145.417
AK2946	ARIZ:AK2946	AKE	North America	Ophioparma ventosa	Chlorolichen	65.4841	-145.417
AK2947	ARIZ:AK2947	AKE	North America	Ophioparma ventosa	Chlorolichen	65.4841	-145.417
AK2948	ARIZ:AK2948	AKE	North America	Ophioparma ventosa	Chlorolichen	65.4841	-145.417
AK2949	ARIZ:AK2949	AKE	North America	Ophioparma ventosa	Chlorolichen	65.4841	-145.417
AK2950	ARIZ:AK2950	AKE	North America	Ophioparma ventosa	Chlorolichen	65.4841	-145.417
AK2951	ARIZ:AK2951	AKE	North America	Ophioparma ventosa	Chlorolichen	65.4841	-145.417
AK2952	ARIZ:AK2952	AKE	North America	Ophioparma ventosa	Chlorolichen	65.4841	-145.417
AK2953	ARIZ:AK2953	AKE	North America	Ophioparma ventosa	Chlorolichen	65.4841	-145.417
AK2954	ARIZ:AK2954	AKE	North America	Ophioparma ventosa	Chlorolichen	65.4841	-145.417
AK2955	ARIZ:AK2955	AKE	North America	Ophioparma ventosa	Chlorolichen	65.4841	-145.417
AK2956	ARIZ:AK2956	AKE	North America	Ophioparma ventosa	Chlorolichen	65.4841	-145.417
AK2957	ARIZ:AK2957	AKE	North America	Ophioparma ventosa	Chlorolichen	65.4841	-145.417
AK2958	ARIZ:AK2958	AKE	North America	Ophioparma ventosa	Chlorolichen	65.4841	-145.417
AK2959	ARIZ:AK2959	AKE	North America	Ophioparma ventosa	Chlorolichen	65.4841	-145.417
AK2960	ARIZ:AK2960	AKE	North America	Ophioparma ventosa	Chlorolichen	65.4841	-145.417
AK2961	ARIZ:AK2961	AKE	North America	Ophioparma ventosa	Chlorolichen	65.4841	-145.417
AK2962	ARIZ:AK2962	AKE	North America	Ophioparma ventosa	Chlorolichen	65.4841	-145.417
AK2963	ARIZ:AK2963	AKE	North America	Ophioparma ventosa	Chlorolichen	65.4841	-145.417
AK2964	ARIZ:AK2964	AKE	North America	Ophioparma ventosa	Chlorolichen	65.4841	-145.417
AK2965	ARIZ:AK2965	AKE	North America	Ophioparma ventosa	Chlorolichen	65.4841	-145.417
AK2966	ARIZ:AK2966	AKE	North America	Ophioparma ventosa	Chlorolichen	65.4841	-145.417
AK2967	ARIZ:AK2967	AKE	North America	Ophioparma ventosa	Chlorolichen	65.4841	-145.417
AK2968	ARIZ:AK2968	AKE	North America	Ophioparma ventosa	Chlorolichen	65.4841	-145.417
AK2969	ARIZ:AK2969	AKE	North America	Ophioparma ventosa	Chlorolichen	65.4841	-145.417
AK2970	ARIZ:AK2970	AKE	North America	Ophioparma ventosa	Chlorolichen	65.4841	-145.417
AK2971	ARIZ:AK2971	AKE	North America	Arctoparmelia spp	Chlorolichen	65.4849	-145.416
AK2972	ARIZ:AK2972	AKE	North America	Arctoparmelia spp	Chlorolichen	65.4849	-145.416
AK2973	ARIZ:AK2973	AKE	North America	Arctoparmelia spp	Chlorolichen	65.4849	-145.416
AK2974	ARIZ:AK2974	AKE	North America	Arctoparmelia spp	Chlorolichen	65.4849	-145.416
AK2976	ARIZ:AK2976	AKE	North America	Arctoparmelia spp	Chlorolichen	65.4849	-145.416
AK2977	ARIZ:AK2977	AKE	North America	Arctoparmelia spp	Chlorolichen	65.4849	-145.416
AK2978	ARIZ:AK2978	AKE	North America	Arctoparmelia spp	Chlorolichen	65.4849	-145.416
AK2979	ARIZ:AK2979	AKE	North America	Arctoparmelia spp	Chlorolichen	65.4849	-145.416
AK2980	ARIZ:AK2980	AKE	North America	Arctoparmelia spp	Chlorolichen	65.4849	-145.416
AK2981	ARIZ:AK2981	AKE	North America	Arctoparmelia spp	Chlorolichen	65.4849	-145.416
AK2982	ARIZ:AK2982	AKE	North America	Arctoparmelia spp	Chlorolichen	65.4849	-145.416
AK2983	ARIZ:AK2983	AKE	North America	Arctoparmelia spp	Chlorolichen	65.4849	-145.416
AK2984	ARIZ:AK2984	AKE	North America	Arctoparmelia spp	Chlorolichen	65.4849	-145.416
AK2985	ARIZ:AK2985	AKE	North America	Arctoparmelia spp	Chlorolichen	65.4849	-145.416
AK2986	ARIZ:AK2986	AKE	North America	Arctoparmelia spp	Chlorolichen	65.4849	-145.416
AK2987	ARIZ:AK2987	AKE	North America	Arctoparmelia spp	Chlorolichen	65.4849	-145.416
AK2988	ARIZ:AK2988	AKE	North America	Arctoparmelia spp	Chlorolichen	65.4849	-145.416
AK2989	ARIZ:AK2989	AKE	North America	Arctoparmelia spp	Chlorolichen	65.4849	-145.416
AK2990	ARIZ:AK2990	AKE	North America	Arctoparmelia spp	Chlorolichen	65.4849	-145.416
AK2991	ARIZ:AK2991	AKE	North America	Arctoparmelia spp	Chlorolichen	65.4849	-145.416
AK2993	ARIZ:AK2993	AKE	North America	Arctoparmelia spp	Chlorolichen	65.4849	-145.416
AK2996	ARIZ:AK2996	AKE	North America	Arctoparmelia spp	Chlorolichen	65.4849	-145.416
AK2997	ARIZ:AK2997	AKE	North America	Arctoparmelia spp	Chlorolichen	65.4849	-145.416
AK2998	ARIZ:AK2998	AKE	North America	Arctoparmelia spp	Chlorolichen	65.4849	-145.416
AK2999	ARIZ:AK2999	AKE	North America	Arctoparmelia spp	Chlorolichen	65.4849	-145.416
AK3001	ARIZ:AK3001	AKE	North America	Arctoparmelia spp	Chlorolichen	65.4849	-145.416
AK3002	ARIZ:AK3002	AKE	North America	Arctoparmelia spp	Chlorolichen	65.4849	-145.416
AK3003	ARIZ:AK3003	AKE	North America	Arctoparmelia spp	Chlorolichen	65.4849	-145.416
AK3004	ARIZ:AK3004	AKE	North America	Arctoparmelia spp	Chlorolichen	65.4849	-145.416
AK3005	ARIZ:AK3005	AKE	North America	Arctoparmelia spp	Chlorolichen	65.4849	-145.416
AK3006	ARIZ:AK3006	AKE	North America	Arctoparmelia spp	Chlorolichen	65.4849	-145.416
AK3007	ARIZ:AK3007	AKE	North America	Arctoparmelia spp	Chlorolichen	65.4849	-145.416
AK3008	ARIZ:AK3008	AKE	North America	Arctoparmelia spp	Chlorolichen	65.4849	-145.416
AK3009	ARIZ:AK3009	AKE	North America	Arctoparmelia spp	Chlorolichen	65.4849	-145.416
AK3010	ARIZ:AK3010	AKE	North America	Arctoparmelia spp	Chlorolichen	65.4849	-145.416
AK3011	ARIZ:AK3011	AKE	North America	Arctoparmelia spp	Chlorolichen	65.4849	-145.416
AK3012	ARIZ:AK3012	AKE	North America	Arctoparmelia spp	Chlorolichen	65.4849	-145.416
AK3013	ARIZ:AK3013	AKE	North America	Arctoparmelia spp	Chlorolichen	65.4849	-145.416
AK3014	ARIZ:AK3014	AKE	North America	Arctoparmelia spp	Chlorolichen	65.4849	-145.416
AK3015	ARIZ:AK3015	AKE	North America	Arctoparmelia spp	Chlorolichen	65.4849	-145.416
AK3016	ARIZ:AK3016	AKE	North America	Arctoparmelia spp	Chlorolichen	65.4849	-145.416
AK3017	ARIZ:AK3017	AKE	North America	Arctoparmelia spp	Chlorolichen	65.4849	-145.416
AK3018	ARIZ:AK3018	AKE	North America	Arctoparmelia spp	Chlorolichen	65.4849	-145.416
AK3019	ARIZ:AK3019	AKE	North America	Arctoparmelia spp	Chlorolichen	65.4849	-145.416
AK3020	ARIZ:AK3020	AKE	North America	Arctoparmelia spp	Chlorolichen	65.4849	-145.416
AK3021	ARIZ:AK3021	AKE	North America	Arctoparmelia spp	Chlorolichen	65.4849	-145.416
AK3022	ARIZ:AK3022	AKE	North America	Arctoparmelia spp	Chlorolichen	65.4849	-145.416
AK3023	ARIZ:AK3023	AKE	North America	Arctoparmelia spp	Chlorolichen	65.4849	-145.416
AK3024	ARIZ:AK3024	AKE	North America	Arctoparmelia spp	Chlorolichen	65.4849	-145.416
AK3025	ARIZ:AK3025	AKE	North America	Arctoparmelia spp	Chlorolichen	65.4849	-145.416
AK3026	ARIZ:AK3026	AKE	North America	Arctoparmelia spp	Chlorolichen	65.4849	-145.416
AK3028	ARIZ:AK3028	AKE	North America	Arctoparmelia spp	Chlorolichen	65.4849	-145.416
AK3030	ARIZ:AK3030	AKE	North America	Arctoparmelia spp	Chlorolichen	65.4849	-145.416
AK3031	ARIZ:AK3031	AKE	North America	Arctoparmelia spp	Chlorolichen	65.4849	-145.416
AK3032	ARIZ:AK3032	AKE	North America	Arctoparmelia spp	Chlorolichen	65.4849	-145.416
AK3033	ARIZ:AK3033	AKE	North America	Arctoparmelia spp	Chlorolichen	65.4849	-145.416
AK3034	ARIZ:AK3034	AKE	North America	Arctoparmelia spp	Chlorolichen	65.4849	-145.416
AK3035	ARIZ:AK3035	AKE	North America	Arctoparmelia spp	Chlorolichen	65.4849	-145.416
AK3036	ARIZ:AK3036	AKE	North America	Arctoparmelia spp	Chlorolichen	65.4849	-145.416
AK3037	ARIZ:AK3037	AKE	North America	Arctoparmelia spp	Chlorolichen	65.4849	-145.416
AK3038	ARIZ:AK3038	AKE	North America	Arctoparmelia spp	Chlorolichen	65.4849	-145.416
AK3039	ARIZ:AK3039	AKE	North America	Arctoparmelia spp	Chlorolichen	65.4849	-145.416
AK3040	ARIZ:AK3040	AKE	North America	Arctoparmelia spp	Chlorolichen	65.4849	-145.416
AK3041	ARIZ:AK3041	AKE	North America	Arctoparmelia spp	Chlorolichen	65.4849	-145.416
AK3042	ARIZ:AK3042	AKE	North America	Arctoparmelia spp	Chlorolichen	65.4849	-145.416
AK3043	ARIZ:AK3043	AKE	North America	Arctoparmelia spp	Chlorolichen	65.4849	-145.416
AK3044	ARIZ:AK3044	AKE	North America	Arctoparmelia spp	Chlorolichen	65.4849	-145.416
AK3045	ARIZ:AK3045	AKE	North America	Arctoparmelia spp	Chlorolichen	65.4849	-145.416
AK3046	ARIZ:AK3046	AKE	North America	Arctoparmelia spp	Chlorolichen	65.4849	-145.416
AK3047	ARIZ:AK3047	AKE	North America	Arctoparmelia spp	Chlorolichen	65.4849	-145.416
AK3048	ARIZ:AK3048	AKE	North America	Arctoparmelia spp	Chlorolichen	65.4849	-145.416
AK3049	ARIZ:AK3049	AKE	North America	Arctoparmelia spp	Chlorolichen	65.4849	-145.416
AK3051	ARIZ:AK3051	AKE	North America	Arctoparmelia spp	Chlorolichen	65.4849	-145.416
AK3052	ARIZ:AK3052	AKE	North America	Arctoparmelia spp	Chlorolichen	65.4849	-145.416
AK3054	ARIZ:AK3054	AKE	North America	Arctoparmelia spp	Chlorolichen	65.4849	-145.416
AK3055	ARIZ:AK3055	AKE	North America	Arctoparmelia spp	Chlorolichen	65.4849	-145.416
AK3056	ARIZ:AK3056	AKE	North America	Arctoparmelia spp	Chlorolichen	65.4849	-145.416
AK3057	ARIZ:AK3057	AKE	North America	Arctoparmelia spp	Chlorolichen	65.4849	-145.416
AK3058	ARIZ:AK3058	AKE	North America	Arctoparmelia spp	Chlorolichen	65.4849	-145.416
AK3059	ARIZ:AK3059	AKE	North America	Cladonia mitis	Chlorolichen	65.4842	-145.414
AK3060	ARIZ:AK3060	AKE	North America	Cladonia mitis	Chlorolichen	65.4842	-145.414
AK3061	ARIZ:AK3061	AKE	North America	Cladonia mitis	Chlorolichen	65.4842	-145.414
AK3062	ARIZ:AK3062	AKE	North America	Cladonia mitis	Chlorolichen	65.4842	-145.414
AK3063	ARIZ:AK3063	AKE	North America	Cladonia mitis	Chlorolichen	65.4842	-145.414
AK3064	ARIZ:AK3064	AKE	North America	Cladonia mitis	Chlorolichen	65.4842	-145.414
AK3065	ARIZ:AK3065	AKE	North America	Cladonia mitis	Chlorolichen	65.4842	-145.414
AK3066	ARIZ:AK3066	AKE	North America	Cladonia mitis	Chlorolichen	65.4842	-145.414
AK3067	ARIZ:AK3067	AKE	North America	Cladonia mitis	Chlorolichen	65.4842	-145.414
AK3069	ARIZ:AK3069	AKE	North America	Cladonia mitis	Chlorolichen	65.4842	-145.414
AK3070	ARIZ:AK3070	AKE	North America	Cladonia mitis	Chlorolichen	65.4842	-145.414
AK3071	ARIZ:AK3071	AKE	North America	Cladonia mitis	Chlorolichen	65.4842	-145.414
AK3072	ARIZ:AK3072	AKE	North America	Cladonia mitis	Chlorolichen	65.4842	-145.414
AK3073	ARIZ:AK3073	AKE	North America	Cladonia mitis	Chlorolichen	65.4842	-145.414
AK3074	ARIZ:AK3074	AKE	North America	Cladonia mitis	Chlorolichen	65.4842	-145.414
AK3075	ARIZ:AK3075	AKE	North America	Cladonia mitis	Chlorolichen	65.4842	-145.414
AK3076	ARIZ:AK3076	AKE	North America	Cladonia mitis	Chlorolichen	65.4842	-145.414
AK3077	ARIZ:AK3077	AKE	North America	Cladonia mitis	Chlorolichen	65.4842	-145.414
AK3078	ARIZ:AK3078	AKE	North America	Cladonia mitis	Chlorolichen	65.4842	-145.414
AK3079	ARIZ:AK3079	AKE	North America	Cladonia mitis	Chlorolichen	65.4842	-145.414
AK3080	ARIZ:AK3080	AKE	North America	Cladonia mitis	Chlorolichen	65.4842	-145.414
AK3081	ARIZ:AK3081	AKE	North America	Cladonia mitis	Chlorolichen	65.4842	-145.414
AK3083	ARIZ:AK3083	AKE	North America	Cladonia mitis	Chlorolichen	65.4842	-145.414
AK3085	ARIZ:AK3085	AKE	North America	Cladonia mitis	Chlorolichen	65.4842	-145.414
AK3086	ARIZ:AK3086	AKE	North America	Cladonia mitis	Chlorolichen	65.4842	-145.414
AK3087	ARIZ:AK3087	AKE	North America	Cladonia mitis	Chlorolichen	65.4842	-145.414
AK3088	ARIZ:AK3088	AKE	North America	Cladonia mitis	Chlorolichen	65.4842	-145.414
AK3089	ARIZ:AK3089	AKE	North America	Cladonia mitis	Chlorolichen	65.4842	-145.414
AK3090	ARIZ:AK3090	AKE	North America	Cladonia mitis	Chlorolichen	65.4842	-145.414
AK3091	ARIZ:AK3091	AKE	North America	Cladonia mitis	Chlorolichen	65.4842	-145.414
AK3092	ARIZ:AK3092	AKE	North America	Cladonia mitis	Chlorolichen	65.4842	-145.414
AK3093	ARIZ:AK3093	AKE	North America	Cladonia mitis	Chlorolichen	65.4842	-145.414
AK3094	ARIZ:AK3094	AKE	North America	Cladonia mitis	Chlorolichen	65.4842	-145.414
AK3095	ARIZ:AK3095	AKE	North America	Cladonia mitis	Chlorolichen	65.4842	-145.414
AK3096	ARIZ:AK3096	AKE	North America	Cladonia mitis	Chlorolichen	65.4842	-145.414
AK3097	ARIZ:AK3097	AKE	North America	Cladonia mitis	Chlorolichen	65.4842	-145.414
AK3098	ARIZ:AK3098	AKE	North America	Cladonia mitis	Chlorolichen	65.4842	-145.414
AK3099	ARIZ:AK3099	AKE	North America	Cladonia mitis	Chlorolichen	65.4842	-145.414
AK3100	ARIZ:AK3100	AKE	North America	Cladonia mitis	Chlorolichen	65.4842	-145.414
AK3101	ARIZ:AK3101	AKE	North America	Cladonia mitis	Chlorolichen	65.4842	-145.414
AK3102	ARIZ:AK3102	AKE	North America	Cladonia mitis	Chlorolichen	65.4842	-145.414
AK3103	ARIZ:AK3103	AKE	North America	Cladonia mitis	Chlorolichen	65.4842	-145.414
AK3105	ARIZ:AK3105	AKE	North America	Cladonia mitis	Chlorolichen	65.4842	-145.414
AK3106	ARIZ:AK3106	AKE	North America	Cladonia mitis	Chlorolichen	65.4842	-145.414
AK3107	ARIZ:AK3107	AKE	North America	Cladonia mitis	Chlorolichen	65.4842	-145.414
AK3108	ARIZ:AK3108	AKE	North America	Cladonia mitis	Chlorolichen	65.4842	-145.414
AK3109	ARIZ:AK3109	AKE	North America	Cladonia mitis	Chlorolichen	65.4842	-145.414
AK3110	ARIZ:AK3110	AKE	North America	Cladonia mitis	Chlorolichen	65.4842	-145.414
AK3111	ARIZ:AK3111	AKE	North America	Cladonia mitis	Chlorolichen	65.4842	-145.414
AK3112	ARIZ:AK3112	AKE	North America	Cladonia mitis	Chlorolichen	65.4842	-145.414
AK3113	ARIZ:AK3113	AKE	North America	Cladonia mitis	Chlorolichen	65.4842	-145.414
AK3114	ARIZ:AK3114	AKE	North America	Cladonia mitis	Chlorolichen	65.4842	-145.414
AK3115	ARIZ:AK3115	AKE	North America	Cladonia mitis	Chlorolichen	65.4842	-145.414
AK3116	ARIZ:AK3116	AKE	North America	Cladonia mitis	Chlorolichen	65.4842	-145.414
AK3117	ARIZ:AK3117	AKE	North America	Cladonia mitis	Chlorolichen	65.4842	-145.414
AK3118	ARIZ:AK3118	AKE	North America	Cladonia mitis	Chlorolichen	65.4842	-145.414
AK3119	ARIZ:AK3119	AKE	North America	Cladonia mitis	Chlorolichen	65.4842	-145.414
AK3120	ARIZ:AK3120	AKE	North America	Cladonia mitis	Chlorolichen	65.4842	-145.414
AK3121	ARIZ:AK3121	AKE	North America	Cladonia mitis	Chlorolichen	65.4842	-145.414
AK3122	ARIZ:AK3122	AKE	North America	Cladonia mitis	Chlorolichen	65.4842	-145.414
AK3123	ARIZ:AK3123	AKE	North America	Cladonia mitis	Chlorolichen	65.4842	-145.414
AK3124	ARIZ:AK3124	AKE	North America	Cladonia mitis	Chlorolichen	65.4842	-145.414
AK3125	ARIZ:AK3125	AKE	North America	Cladonia mitis	Chlorolichen	65.4842	-145.414
AK3126A	ARIZ:AK3126A	AKE	North America	Cladonia mitis	Chlorolichen	65.4842	-145.414
AK3126B	ARIZ:AK3126B	AKE	North America	Cladonia mitis	Chlorolichen	65.4842	-145.414
AK3127	ARIZ:AK3127	AKE	North America	Cladonia mitis	Chlorolichen	65.4842	-145.414
AK3128	ARIZ:AK3128	AKE	North America	Cladonia mitis	Chlorolichen	65.4842	-145.414
AK3129	ARIZ:AK3129	AKE	North America	Cladonia mitis	Chlorolichen	65.4842	-145.414
AK3131	ARIZ:AK3131	AKE	North America	Cladonia mitis	Chlorolichen	65.4842	-145.414
AK3132	ARIZ:AK3132	AKE	North America	Cladonia mitis	Chlorolichen	65.4842	-145.414
AK3133	ARIZ:AK3133	AKE	North America	Cladonia mitis	Chlorolichen	65.4842	-145.414
AK3134	ARIZ:AK3134	AKE	North America	Cladonia mitis	Chlorolichen	65.4842	-145.414
AK3136	ARIZ:AK3136	AKE	North America	Cladonia mitis	Chlorolichen	65.4842	-145.414
AK3137	ARIZ:AK3137	AKE	North America	Cladonia mitis	Chlorolichen	65.4842	-145.414
AK3138	ARIZ:AK3138	AKE	North America	Cladonia mitis	Chlorolichen	65.4842	-145.414
AK3139	ARIZ:AK3139	AKE	North America	Cladonia mitis	Chlorolichen	65.4842	-145.414
AK3140	ARIZ:AK3140	AKE	North America	Cladonia mitis	Chlorolichen	65.4842	-145.414
AK3141	ARIZ:AK3141	AKE	North America	Cladonia mitis	Chlorolichen	65.4841	-145.417
AK3142	ARIZ:AK3142	AKE	North America	Cladonia mitis	Chlorolichen	65.4841	-145.417
AK3143	ARIZ:AK3143	AKE	North America	Cladonia mitis	Chlorolichen	65.4841	-145.417
AK3144	ARIZ:AK3144	AKE	North America	Cladonia mitis	Chlorolichen	65.4841	-145.417
AK3145	ARIZ:AK3145	AKE	North America	Cladonia mitis	Chlorolichen	65.4841	-145.417
AK3146	ARIZ:AK3146	AKE	North America	Cladonia mitis	Chlorolichen	65.4841	-145.417
AK3147	ARIZ:AK3147	AKE	North America	Cladonia mitis	Chlorolichen	65.4841	-145.417
AK3148	ARIZ:AK3148	AKE	North America	Cladonia mitis	Chlorolichen	65.4841	-145.417
AK3149	ARIZ:AK3149	AKE	North America	Cladonia mitis	Chlorolichen	65.4841	-145.417
AK3150	ARIZ:AK3150	AKE	North America	Cladonia mitis	Chlorolichen	65.4841	-145.417
AK3151	ARIZ:AK3151	AKE	North America	Cladonia mitis	Chlorolichen	65.4841	-145.417
AK3152	ARIZ:AK3152	AKE	North America	Cladonia mitis	Chlorolichen	65.4841	-145.417
AK3153	ARIZ:AK3153	AKE	North America	Cladonia mitis	Chlorolichen	65.4841	-145.417
AK3154	ARIZ:AK3154	AKE	North America	Cladonia mitis	Chlorolichen	65.4841	-145.417
AK3155	ARIZ:AK3155	AKE	North America	Cladonia mitis	Chlorolichen	65.4841	-145.417
AK3156	ARIZ:AK3156	AKE	North America	Cladonia mitis	Chlorolichen	65.4841	-145.417
AK3157	ARIZ:AK3157	AKE	North America	Cladonia mitis	Chlorolichen	65.4841	-145.417
AK3158	ARIZ:AK3158	AKE	North America	Cladonia mitis	Chlorolichen	65.4841	-145.417
AK3159	ARIZ:AK3159	AKE	North America	Cladonia mitis	Chlorolichen	65.4841	-145.417
AK3160	ARIZ:AK3160	AKE	North America	Cladonia mitis	Chlorolichen	65.4841	-145.417
AK3162	ARIZ:AK3162	AKE	North America	Cladonia mitis	Chlorolichen	65.4841	-145.417
AK3163	ARIZ:AK3163	AKE	North America	Cladonia mitis	Chlorolichen	65.4841	-145.417
AK3164	ARIZ:AK3164	AKE	North America	Cladonia mitis	Chlorolichen	65.4841	-145.417
AK3165	ARIZ:AK3165	AKE	North America	Cladonia mitis	Chlorolichen	65.4841	-145.417
AK3166	ARIZ:AK3166	AKE	North America	Cladonia mitis	Chlorolichen	65.4841	-145.417
AK3167	ARIZ:AK3167	AKE	North America	Cladonia mitis	Chlorolichen	65.4841	-145.417
AK3168	ARIZ:AK3168	AKE	North America	Cladonia mitis	Chlorolichen	65.4841	-145.417
AK3169	ARIZ:AK3169	AKE	North America	Cladonia mitis	Chlorolichen	65.4841	-145.417
AK3170	ARIZ:AK3170	AKE	North America	Cladonia mitis	Chlorolichen	65.4841	-145.417
AK3171	ARIZ:AK3171	AKE	North America	Cladonia mitis	Chlorolichen	65.4841	-145.417
AK3172	ARIZ:AK3172	AKE	North America	Cladonia mitis	Chlorolichen	65.4841	-145.417
AK3173	ARIZ:AK3173	AKE	North America	Cladonia mitis	Chlorolichen	65.4841	-145.417
AK3174	ARIZ:AK3174	AKE	North America	Cladonia mitis	Chlorolichen	65.4841	-145.417
AK3176	ARIZ:AK3176	AKE	North America	Cladonia mitis	Chlorolichen	65.4841	-145.417
AK3177	ARIZ:AK3177	AKE	North America	Cladonia mitis	Chlorolichen	65.4841	-145.417
AK3178	ARIZ:AK3178	AKE	North America	Cladonia mitis	Chlorolichen	65.4841	-145.417
AK3179	ARIZ:AK3179	AKE	North America	Cladonia mitis	Chlorolichen	65.4841	-145.417
AK3180	ARIZ:AK3180	AKE	North America	Cladonia mitis	Chlorolichen	65.4841	-145.417
AK3181	ARIZ:AK3181	AKE	North America	Cladonia mitis	Chlorolichen	65.4841	-145.417
AK3182	ARIZ:AK3182	AKE	North America	Cladonia mitis	Chlorolichen	65.4841	-145.417
AK3183	ARIZ:AK3183	AKE	North America	Cladonia mitis	Chlorolichen	65.4841	-145.417
AK3184	ARIZ:AK3184	AKE	North America	Cladonia mitis	Chlorolichen	65.4841	-145.417
AK3185	ARIZ:AK3185	AKE	North America	Cladonia mitis	Chlorolichen	65.4841	-145.417
AK3187	ARIZ:AK3187	AKE	North America	Cladonia mitis	Chlorolichen	65.4841	-145.417
AK3188	ARIZ:AK3188	AKE	North America	Cladonia mitis	Chlorolichen	65.4841	-145.417
AK3189	ARIZ:AK3189	AKE	North America	Cladonia mitis	Chlorolichen	65.4841	-145.417
AK3190	ARIZ:AK3190	AKE	North America	Cladonia mitis	Chlorolichen	65.4841	-145.417
AK3191	ARIZ:AK3191	AKE	North America	Cladonia mitis	Chlorolichen	65.4841	-145.417
AK3192	ARIZ:AK3192	AKE	North America	Cladonia mitis	Chlorolichen	65.4841	-145.417
AK3194	ARIZ:AK3194	AKE	North America	Cladonia mitis	Chlorolichen	65.4841	-145.417
AK3195	ARIZ:AK3195	AKE	North America	Cladonia mitis	Chlorolichen	65.4841	-145.417
AK3196	ARIZ:AK3196	AKE	North America	Cladonia mitis	Chlorolichen	65.4841	-145.417
AK3197	ARIZ:AK3197	AKE	North America	Cladonia mitis	Chlorolichen	65.4841	-145.417
AK3198	ARIZ:AK3198	AKE	North America	Cladonia mitis	Chlorolichen	65.4841	-145.417
AK3199	ARIZ:AK3199	AKE	North America	Cladonia mitis	Chlorolichen	65.4841	-145.417
AK3200	ARIZ:AK3200	AKE	North America	Cladonia mitis	Chlorolichen	65.4841	-145.417
AK3201	ARIZ:AK3201	AKE	North America	Cladonia mitis	Chlorolichen	65.4841	-145.417
AK3202	ARIZ:AK3202	AKE	North America	Cladonia mitis	Chlorolichen	65.4841	-145.417
AK3203	ARIZ:AK3203	AKE	North America	Cladonia mitis	Chlorolichen	65.4841	-145.417
AK3204	ARIZ:AK3204	AKE	North America	Cladonia mitis	Chlorolichen	65.4841	-145.417
AK3205	ARIZ:AK3205	AKE	North America	Cladonia mitis	Chlorolichen	65.4841	-145.417
AK3206	ARIZ:AK3206	AKE	North America	Cladonia mitis	Chlorolichen	65.4841	-145.417
AK3207	ARIZ:AK3207	AKE	North America	Cladonia mitis	Chlorolichen	65.4841	-145.417
AK3208	ARIZ:AK3208	AKE	North America	Cladonia mitis	Chlorolichen	65.4841	-145.417
AK3209	ARIZ:AK3209	AKE	North America	Cladonia mitis	Chlorolichen	65.4841	-145.417
AK3210	ARIZ:AK3210	AKE	North America	Cladonia mitis	Chlorolichen	65.4841	-145.417
AK3211	ARIZ:AK3211	AKE	North America	Cladonia mitis	Chlorolichen	65.4841	-145.417
AK3212	ARIZ:AK3212	AKE	North America	Cladonia mitis	Chlorolichen	65.4841	-145.417
AK3213	ARIZ:AK3213	AKE	North America	Cladonia mitis	Chlorolichen	65.4841	-145.417
AK3214	ARIZ:AK3214	AKE	North America	Cladonia mitis	Chlorolichen	65.4841	-145.417
AK3215	ARIZ:AK3215	AKE	North America	Cladonia mitis	Chlorolichen	65.4841	-145.417
AK3217	ARIZ:AK3217	AKE	North America	Cladonia mitis	Chlorolichen	65.4841	-145.417
AK3218	ARIZ:AK3218	AKE	North America	Cladonia mitis	Chlorolichen	65.4841	-145.417
AK3219	ARIZ:AK3219	AKE	North America	Cladonia mitis	Chlorolichen	65.4841	-145.417
AK3220	ARIZ:AK3220	AKE	North America	Cladonia mitis	Chlorolichen	65.4841	-145.417
AK3221	ARIZ:AK3221	AKE	North America	Cladonia mitis	Chlorolichen	65.4841	-145.417
AK3223	ARIZ:AK3223	AKE	North America	Cladonia mitis	Chlorolichen	65.4841	-145.417
AK3224	ARIZ:AK3224	AKE	North America	Cladonia mitis	Chlorolichen	65.4841	-145.417
AK3225	ARIZ:AK3225	AKE	North America	Cladonia mitis	Chlorolichen	65.4841	-145.417
AK3226	ARIZ:AK3226	AKE	North America	Cladonia mitis	Chlorolichen	65.4841	-145.417
AK3227	ARIZ:AK3227	AKE	North America	Cladonia mitis	Chlorolichen	65.4841	-145.417
AK3228	ARIZ:AK3228	AKE	North America	Cladonia mitis	Chlorolichen	65.4841	-145.417
AK3229	ARIZ:AK3229	AKE	North America	Cladonia mitis	Chlorolichen	65.4841	-145.417
AK3230	ARIZ:AK3230	AKE	North America	Cladonia mitis	Chlorolichen	65.4841	-145.417
AK3231	ARIZ:AK3231	AKE	North America	Cladonia mitis	Chlorolichen	65.4841	-145.417
AK3232	ARIZ:AK3232	AKE	North America	Cladonia mitis	Chlorolichen	65.4841	-145.417
AK3233	ARIZ:AK3233	AKE	North America	Cladonia mitis	Chlorolichen	65.4841	-145.417
AK3234	ARIZ:AK3234	AKE	North America	Cladonia mitis	Chlorolichen	65.4841	-145.417
AK3235	ARIZ:AK3235	AKE	North America	Rhizocarpon cf geographicum	Chlorolichen	65.4842	-145.414
AK3236	ARIZ:AK3236	AKE	North America	Rhizocarpon cf geographicum	Chlorolichen	65.4842	-145.414
AK3237	ARIZ:AK3237	AKE	North America	Rhizocarpon cf geographicum	Chlorolichen	65.4842	-145.414
AK3238	ARIZ:AK3238	AKE	North America	Rhizocarpon cf geographicum	Chlorolichen	65.4842	-145.414
AK3239	ARIZ:AK3239	AKE	North America	Rhizocarpon cf geographicum	Chlorolichen	65.4842	-145.414
AK3240	ARIZ:AK3240	AKE	North America	Rhizocarpon cf geographicum	Chlorolichen	65.4842	-145.414
AK3241	ARIZ:AK3241	AKE	North America	Rhizocarpon cf geographicum	Chlorolichen	65.4842	-145.414
AK3242	ARIZ:AK3242	AKE	North America	Rhizocarpon cf geographicum	Chlorolichen	65.4842	-145.414
AK3243	ARIZ:AK3243	AKE	North America	Rhizocarpon cf geographicum	Chlorolichen	65.4842	-145.414
AK3244	ARIZ:AK3244	AKE	North America	Rhizocarpon cf geographicum	Chlorolichen	65.4842	-145.414
AK3245	ARIZ:AK3245	AKE	North America	Rhizocarpon cf geographicum	Chlorolichen	65.4842	-145.414
AK3246	ARIZ:AK3246	AKE	North America	Rhizocarpon cf geographicum	Chlorolichen	65.4842	-145.414
AK3247	ARIZ:AK3247	AKE	North America	Rhizocarpon cf geographicum	Chlorolichen	65.4842	-145.414
AK3248	ARIZ:AK3248	AKE	North America	Rhizocarpon cf geographicum	Chlorolichen	65.4842	-145.414
AK3249	ARIZ:AK3249	AKE	North America	Rhizocarpon cf geographicum	Chlorolichen	65.4842	-145.414
AK3250	ARIZ:AK3250	AKE	North America	Rhizocarpon cf geographicum	Chlorolichen	65.4842	-145.414
AK3251	ARIZ:AK3251	AKE	North America	Rhizocarpon cf geographicum	Chlorolichen	65.4842	-145.414
AK3252	ARIZ:AK3252	AKE	North America	Rhizocarpon cf geographicum	Chlorolichen	65.4842	-145.414
AK3253	ARIZ:AK3253	AKE	North America	Rhizocarpon cf geographicum	Chlorolichen	65.4842	-145.414
AK3254	ARIZ:AK3254	AKE	North America	Rhizocarpon cf geographicum	Chlorolichen	65.4842	-145.414
AK3255	ARIZ:AK3255	AKE	North America	Rhizocarpon cf geographicum	Chlorolichen	65.4842	-145.414
AK3256	ARIZ:AK3256	AKE	North America	Rhizocarpon cf geographicum	Chlorolichen	65.4842	-145.414
AK3257	ARIZ:AK3257	AKE	North America	Rhizocarpon cf geographicum	Chlorolichen	65.4842	-145.414
AK3259	ARIZ:AK3259	AKE	North America	Rhizocarpon cf geographicum	Chlorolichen	65.4842	-145.414
AK3260	ARIZ:AK3260	AKE	North America	Rhizocarpon cf geographicum	Chlorolichen	65.4842	-145.414
AK3261	ARIZ:AK3261	AKE	North America	Rhizocarpon cf geographicum	Chlorolichen	65.4842	-145.414
AK3262	ARIZ:AK3262	AKE	North America	Rhizocarpon cf geographicum	Chlorolichen	65.4842	-145.414
AK3263	ARIZ:AK3263	AKE	North America	Rhizocarpon cf geographicum	Chlorolichen	65.4842	-145.414
AK3264	ARIZ:AK3264	AKE	North America	Rhizocarpon cf geographicum	Chlorolichen	65.4842	-145.414
AK3265	ARIZ:AK3265	AKE	North America	Rhizocarpon cf geographicum	Chlorolichen	65.4842	-145.414
AK3266	ARIZ:AK3266	AKE	North America	Rhizocarpon cf geographicum	Chlorolichen	65.4842	-145.414
AK3267	ARIZ:AK3267	AKE	North America	Rhizocarpon cf geographicum	Chlorolichen	65.4842	-145.414
AK3268	ARIZ:AK3268	AKE	North America	Rhizocarpon cf geographicum	Chlorolichen	65.4842	-145.414
AK3269	ARIZ:AK3269	AKE	North America	Rhizocarpon cf geographicum	Chlorolichen	65.4842	-145.414
AK3270	ARIZ:AK3270	AKE	North America	Rhizocarpon cf geographicum	Chlorolichen	65.4842	-145.414
AK3271	ARIZ:AK3271	AKE	North America	Rhizocarpon cf geographicum	Chlorolichen	65.4842	-145.414
AK3272	ARIZ:AK3272	AKE	North America	Rhizocarpon cf geographicum	Chlorolichen	65.4842	-145.414
AK3273	ARIZ:AK3273	AKE	North America	Rhizocarpon cf geographicum	Chlorolichen	65.4842	-145.414
AK3274	ARIZ:AK3274	AKE	North America	Rhizocarpon cf geographicum	Chlorolichen	65.4842	-145.414
AK3276	ARIZ:AK3276	AKE	North America	Rhizocarpon cf geographicum	Chlorolichen	65.4842	-145.414
AK3277	ARIZ:AK3277	AKE	North America	Rhizocarpon cf geographicum	Chlorolichen	65.4842	-145.414
AK3278	ARIZ:AK3278	AKE	North America	Rhizocarpon cf geographicum	Chlorolichen	65.4842	-145.414
AK3279	ARIZ:AK3279	AKE	North America	Rhizocarpon cf geographicum	Chlorolichen	65.4842	-145.414
AK3280	ARIZ:AK3280	AKE	North America	Rhizocarpon cf geographicum	Chlorolichen	65.4842	-145.414
AK3281	ARIZ:AK3281	AKE	North America	Rhizocarpon cf geographicum	Chlorolichen	65.4842	-145.414
AK3282	ARIZ:AK3282	AKE	North America	Rhizocarpon cf geographicum	Chlorolichen	65.4842	-145.414
AK3283	ARIZ:AK3283	AKE	North America	Rhizocarpon cf geographicum	Chlorolichen	65.4842	-145.414
AK3284	ARIZ:AK3284	AKE	North America	Rhizocarpon cf geographicum	Chlorolichen	65.4842	-145.414
AK3285	ARIZ:AK3285	AKE	North America	Rhizocarpon cf geographicum	Chlorolichen	65.4842	-145.414
AK3286	ARIZ:AK3286	AKE	North America	Rhizocarpon cf geographicum	Chlorolichen	65.4842	-145.414
AK3287	ARIZ:AK3287	AKE	North America	Rhizocarpon cf geographicum	Chlorolichen	65.4842	-145.414
AK3288	ARIZ:AK3288	AKE	North America	Rhizocarpon cf geographicum	Chlorolichen	65.4842	-145.414
AK3289	ARIZ:AK3289	AKE	North America	Rhizocarpon cf geographicum	Chlorolichen	65.4842	-145.414
AK3290	ARIZ:AK3290	AKE	North America	Rhizocarpon cf geographicum	Chlorolichen	65.4842	-145.414
AK3291	ARIZ:AK3291	AKE	North America	Rhizocarpon cf geographicum	Chlorolichen	65.4842	-145.414
AK3292	ARIZ:AK3292	AKE	North America	Rhizocarpon cf geographicum	Chlorolichen	65.4842	-145.414
AK3293	ARIZ:AK3293	AKE	North America	Rhizocarpon cf geographicum	Chlorolichen	65.4842	-145.414
AK3294	ARIZ:AK3294	AKE	North America	Rhizocarpon cf geographicum	Chlorolichen	65.4842	-145.414
AK3295	ARIZ:AK3295	AKE	North America	Rhizocarpon cf geographicum	Chlorolichen	65.4842	-145.414
AK3296	ARIZ:AK3296	AKE	North America	Rhizocarpon cf geographicum	Chlorolichen	65.4842	-145.414
AK3297	ARIZ:AK3297	AKE	North America	Rhizocarpon cf geographicum	Chlorolichen	65.4842	-145.414
AK3298	ARIZ:AK3298	AKE	North America	Rhizocarpon cf geographicum	Chlorolichen	65.4842	-145.414
AK3299	ARIZ:AK3299	AKE	North America	Rhizocarpon cf geographicum	Chlorolichen	65.4842	-145.414
AK3300	ARIZ:AK3300	AKE	North America	Rhizocarpon cf geographicum	Chlorolichen	65.4842	-145.414
AK3301	ARIZ:AK3301	AKE	North America	Rhizocarpon cf geographicum	Chlorolichen	65.4842	-145.414
AK3302	ARIZ:AK3302	AKE	North America	Rhizocarpon cf geographicum	Chlorolichen	65.4842	-145.414
AK3303	ARIZ:AK3303	AKE	North America	Rhizocarpon cf geographicum	Chlorolichen	65.4842	-145.414
AK3304	ARIZ:AK3304	AKE	North America	Rhizocarpon cf geographicum	Chlorolichen	65.4842	-145.414
AK3305	ARIZ:AK3305	AKE	North America	Rhizocarpon cf geographicum	Chlorolichen	65.4842	-145.414
AK3306	ARIZ:AK3306	AKE	North America	Rhizocarpon cf geographicum	Chlorolichen	65.4842	-145.414
AK3307	ARIZ:AK3307	AKE	North America	Rhizocarpon cf geographicum	Chlorolichen	65.4842	-145.414
AK3308	ARIZ:AK3308	AKE	North America	Rhizocarpon cf geographicum	Chlorolichen	65.4842	-145.414
AK3309	ARIZ:AK3309	AKE	North America	Rhizocarpon cf geographicum	Chlorolichen	65.4842	-145.414
AK3310	ARIZ:AK3310	AKE	North America	Rhizocarpon cf geographicum	Chlorolichen	65.4842	-145.414
AK3311	ARIZ:AK3311	AKE	North America	Masonhalea richardsonii	Chlorolichen	65.4841	-145.417
AK3312	ARIZ:AK3312	AKE	North America	Masonhalea richardsonii	Chlorolichen	65.4841	-145.417
AK3313	ARIZ:AK3313	AKE	North America	Masonhalea richardsonii	Chlorolichen	65.4841	-145.417
AK3314	ARIZ:AK3314	AKE	North America	Masonhalea richardsonii	Chlorolichen	65.4841	-145.417
AK3315A	ARIZ:AK3315A	AKE	North America	Masonhalea richardsonii	Chlorolichen	65.4841	-145.417
AK3315B	ARIZ:AK3315B	AKE	North America	Masonhalea richardsonii	Chlorolichen	65.4841	-145.417
AK3316	ARIZ:AK3316	AKE	North America	Masonhalea richardsonii	Chlorolichen	65.4841	-145.417
AK3317	ARIZ:AK3317	AKE	North America	Masonhalea richardsonii	Chlorolichen	65.4841	-145.417
AK3318	ARIZ:AK3318	AKE	North America	Masonhalea richardsonii	Chlorolichen	65.4841	-145.417
AK3320	ARIZ:AK3320	AKE	North America	Masonhalea richardsonii	Chlorolichen	65.4841	-145.417
AK3321	ARIZ:AK3321	AKE	North America	Masonhalea richardsonii	Chlorolichen	65.4841	-145.417
AK3322	ARIZ:AK3322	AKE	North America	Masonhalea richardsonii	Chlorolichen	65.4841	-145.417
AK3323	ARIZ:AK3323	AKE	North America	Masonhalea richardsonii	Chlorolichen	65.4842	-145.414
AK3324	ARIZ:AK3324	AKE	North America	Masonhalea richardsonii	Chlorolichen	65.4842	-145.414
AK3325	ARIZ:AK3325	AKE	North America	Masonhalea richardsonii	Chlorolichen	65.4842	-145.414
AK3326	ARIZ:AK3326	AKE	North America	Masonhalea richardsonii	Chlorolichen	65.4842	-145.414
AK3327	ARIZ:AK3327	AKE	North America	Masonhalea richardsonii	Chlorolichen	65.4842	-145.414
AK3328	ARIZ:AK3328	AKE	North America	Masonhalea richardsonii	Chlorolichen	65.4842	-145.414
AK3329	ARIZ:AK3329	AKE	North America	Masonhalea richardsonii	Chlorolichen	65.4842	-145.414
AK3330	ARIZ:AK3330	AKE	North America	Masonhalea richardsonii	Chlorolichen	65.4842	-145.414
AK3331	ARIZ:AK3331	AKE	North America	Masonhalea richardsonii	Chlorolichen	65.4842	-145.414
AK3332	ARIZ:AK3332	AKE	North America	Masonhalea richardsonii	Chlorolichen	65.4842	-145.414
AK3333	ARIZ:AK3333	AKE	North America	Masonhalea richardsonii	Chlorolichen	65.4842	-145.414
AK3334	ARIZ:AK3334	AKE	North America	Masonhalea richardsonii	Chlorolichen	65.4842	-145.414
AK3335	ARIZ:AK3335	AKE	North America	Masonhalea richardsonii	Chlorolichen	65.4842	-145.414
AK3336	ARIZ:AK3336	AKE	North America	Masonhalea richardsonii	Chlorolichen	65.4842	-145.414
AK3337	ARIZ:AK3337	AKE	North America	Masonhalea richardsonii	Chlorolichen	65.4842	-145.414
AK3338	ARIZ:AK3338	AKE	North America	Masonhalea richardsonii	Chlorolichen	65.4842	-145.414
AK3339	ARIZ:AK3339	AKE	North America	Masonhalea richardsonii	Chlorolichen	65.4849	-145.416
AK3340	ARIZ:AK3340	AKE	North America	Masonhalea richardsonii	Chlorolichen	65.4849	-145.416
AK3341	ARIZ:AK3341	AKE	North America	Masonhalea richardsonii	Chlorolichen	65.4849	-145.416
AK3342	ARIZ:AK3342	AKE	North America	Masonhalea richardsonii	Chlorolichen	65.4849	-145.416
AK3343	ARIZ:AK3343	AKE	North America	Masonhalea richardsonii	Chlorolichen	65.4849	-145.416
AK3344	ARIZ:AK3344	AKE	North America	Masonhalea richardsonii	Chlorolichen	65.4849	-145.416
AK3345	ARIZ:AK3345	AKE	North America	Masonhalea richardsonii	Chlorolichen	65.4849	-145.416
AK3346	ARIZ:AK3346	AKE	North America	Masonhalea richardsonii	Chlorolichen	65.4849	-145.416
AK3347	ARIZ:AK3347	AKE	North America	Masonhalea richardsonii	Chlorolichen	65.4849	-145.416
AK3349	ARIZ:AK3349	AKE	North America	Masonhalea richardsonii	Chlorolichen	65.4849	-145.416
AK3351	ARIZ:AK3351	AKE	North America	Masonhalea richardsonii	Chlorolichen	65.4849	-145.416
AK3352	ARIZ:AK3352	AKE	North America	Masonhalea richardsonii	Chlorolichen	65.4849	-145.416
AK3353	ARIZ:AK3353	AKE	North America	Masonhalea richardsonii	Chlorolichen	65.4849	-145.416
AK3354	ARIZ:AK3354	AKE	North America	Masonhalea richardsonii	Chlorolichen	65.4849	-145.416
AK3355	ARIZ:AK3355	AKE	North America	Masonhalea richardsonii	Chlorolichen	65.4849	-145.416
AK3356	ARIZ:AK3356	AKE	North America	Masonhalea richardsonii	Chlorolichen	65.4849	-145.416
AK3357	ARIZ:AK3357	AKE	North America	Masonhalea richardsonii	Chlorolichen	65.4849	-145.416
AK3359	ARIZ:AK3359	AKE	North America	Masonhalea richardsonii	Chlorolichen	65.4849	-145.416
AK3360	ARIZ:AK3360	AKE	North America	Masonhalea richardsonii	Chlorolichen	65.4849	-145.416
AK3361	ARIZ:AK3361	AKE	North America	Masonhalea richardsonii	Chlorolichen	65.4849	-145.416
AK3362	ARIZ:AK3362	AKE	North America	Masonhalea richardsonii	Chlorolichen	65.4849	-145.416
AK3363	ARIZ:AK3363	AKE	North America	Masonhalea richardsonii	Chlorolichen	65.4849	-145.416
AK3364	ARIZ:AK3364	AKE	North America	Masonhalea richardsonii	Chlorolichen	65.4849	-145.416
AK3365	ARIZ:AK3365	AKE	North America	Flavocetraria cucullata	Chlorolichen	65.4842	-145.414
AK3366	ARIZ:AK3366	AKE	North America	Flavocetraria cucullata	Chlorolichen	65.4842	-145.414
AK3367	ARIZ:AK3367	AKE	North America	Flavocetraria cucullata	Chlorolichen	65.4842	-145.414
AK3368	ARIZ:AK3368	AKE	North America	Flavocetraria cucullata	Chlorolichen	65.4842	-145.414
AK3369	ARIZ:AK3369	AKE	North America	Flavocetraria cucullata	Chlorolichen	65.4842	-145.414
AK3370	ARIZ:AK3370	AKE	North America	Flavocetraria cucullata	Chlorolichen	65.4842	-145.414
AK3371	ARIZ:AK3371	AKE	North America	Flavocetraria cucullata	Chlorolichen	65.4842	-145.414
AK3372	ARIZ:AK3372	AKE	North America	Flavocetraria cucullata	Chlorolichen	65.4842	-145.414
AK3373	ARIZ:AK3373	AKE	North America	Flavocetraria cucullata	Chlorolichen	65.4842	-145.414
AK3374	ARIZ:AK3374	AKE	North America	Flavocetraria cucullata	Chlorolichen	65.4842	-145.414
AK3375	ARIZ:AK3375	AKE	North America	Flavocetraria cucullata	Chlorolichen	65.4842	-145.414
AK3376	ARIZ:AK3376	AKE	North America	Flavocetraria cucullata	Chlorolichen	65.4842	-145.414
AK3377	ARIZ:AK3377	AKE	North America	Flavocetraria cucullata	Chlorolichen	65.4842	-145.414
AK3378	ARIZ:AK3378	AKE	North America	Flavocetraria cucullata	Chlorolichen	65.4842	-145.414
AK3379	ARIZ:AK3379	AKE	North America	Flavocetraria cucullata	Chlorolichen	65.4842	-145.414
AK3380	ARIZ:AK3380	AKE	North America	Flavocetraria cucullata	Chlorolichen	65.4842	-145.414
AK3381	ARIZ:AK3381	AKE	North America	Flavocetraria cucullata	Chlorolichen	65.4842	-145.414
AK3383	ARIZ:AK3383	AKE	North America	Flavocetraria cucullata	Chlorolichen	65.4842	-145.414
AK3384	ARIZ:AK3384	AKE	North America	Flavocetraria cucullata	Chlorolichen	65.4842	-145.414
AK3385	ARIZ:AK3385	AKE	North America	Flavocetraria cucullata	Chlorolichen	65.4842	-145.414
AK3388	ARIZ:AK3388	AKE	North America	Flavocetraria cucullata	Chlorolichen	65.4842	-145.414
AK3389	ARIZ:AK3389	AKE	North America	Flavocetraria cucullata	Chlorolichen	65.4842	-145.414
AK3390	ARIZ:AK3390	AKE	North America	Arctoparmelia spp	Chlorolichen	65.4842	-145.414
AK3391	ARIZ:AK3391	AKE	North America	Arctoparmelia spp	Chlorolichen	65.4842	-145.414
AK3392	ARIZ:AK3392	AKE	North America	Arctoparmelia spp	Chlorolichen	65.4842	-145.414
AK3393	ARIZ:AK3393	AKE	North America	Arctoparmelia spp	Chlorolichen	65.4842	-145.414
AK3394	ARIZ:AK3394	AKE	North America	Arctoparmelia spp	Chlorolichen	65.4842	-145.414
AK3395	ARIZ:AK3395	AKE	North America	Arctoparmelia spp	Chlorolichen	65.4842	-145.414
AK3396	ARIZ:AK3396	AKE	North America	Arctoparmelia spp	Chlorolichen	65.4842	-145.414
AK3397	ARIZ:AK3397	AKE	North America	Arctoparmelia spp	Chlorolichen	65.4842	-145.414
AK3398	ARIZ:AK3398	AKE	North America	Arctoparmelia spp	Chlorolichen	65.4842	-145.414
AK3399	ARIZ:AK3399	AKE	North America	Arctoparmelia spp	Chlorolichen	65.4842	-145.414
AK3400	ARIZ:AK3400	AKE	North America	Arctoparmelia spp	Chlorolichen	65.4842	-145.414
AK3401	ARIZ:AK3401	AKE	North America	Arctoparmelia spp	Chlorolichen	65.4842	-145.414
AK3402	ARIZ:AK3402	AKE	North America	Arctoparmelia spp	Chlorolichen	65.4842	-145.414
AK3403	ARIZ:AK3403	AKE	North America	Arctoparmelia spp	Chlorolichen	65.4842	-145.414
AK3404	ARIZ:AK3404	AKE	North America	Arctoparmelia spp	Chlorolichen	65.4842	-145.414
AK3405	ARIZ:AK3405	AKE	North America	Arctoparmelia spp	Chlorolichen	65.4842	-145.414
AK3407	ARIZ:AK3407	AKE	North America	Arctoparmelia spp	Chlorolichen	65.4842	-145.414
AK3408	ARIZ:AK3408	AKE	North America	Arctoparmelia spp	Chlorolichen	65.4842	-145.414
AK3409	ARIZ:AK3409	AKE	North America	Arctoparmelia spp	Chlorolichen	65.4842	-145.414
AK3410	ARIZ:AK3410	AKE	North America	Arctoparmelia spp	Chlorolichen	65.4842	-145.414
AK3411	ARIZ:AK3411	AKE	North America	Arctoparmelia spp	Chlorolichen	65.4842	-145.414
AK3412	ARIZ:AK3412	AKE	North America	Arctoparmelia spp	Chlorolichen	65.4842	-145.414
AK3413	ARIZ:AK3413	AKE	North America	Arctoparmelia spp	Chlorolichen	65.4842	-145.414
AK3414	ARIZ:AK3414	AKE	North America	Arctoparmelia spp	Chlorolichen	65.4842	-145.414
AK3415	ARIZ:AK3415	AKE	North America	Arctoparmelia spp	Chlorolichen	65.4842	-145.414
AK3416	ARIZ:AK3416	AKE	North America	Arctoparmelia spp	Chlorolichen	65.4842	-145.414
AK3417	ARIZ:AK3417	AKE	North America	Arctoparmelia spp	Chlorolichen	65.4842	-145.414
AK3418	ARIZ:AK3418	AKE	North America	Arctoparmelia spp	Chlorolichen	65.4842	-145.414
AK3419	ARIZ:AK3419	AKE	North America	Arctoparmelia spp	Chlorolichen	65.4842	-145.414
AK3420	ARIZ:AK3420	AKE	North America	Arctoparmelia spp	Chlorolichen	65.4842	-145.414
AK3421	ARIZ:AK3421	AKE	North America	Arctoparmelia spp	Chlorolichen	65.4842	-145.414
AK3422	ARIZ:AK3422	AKE	North America	Arctoparmelia spp	Chlorolichen	65.4842	-145.414
AK3423	ARIZ:AK3423	AKE	North America	Arctoparmelia spp	Chlorolichen	65.4842	-145.414
AK3424	ARIZ:AK3424	AKE	North America	Arctoparmelia spp	Chlorolichen	65.4842	-145.414
AK3425	ARIZ:AK3425	AKE	North America	Arctoparmelia spp	Chlorolichen	65.4842	-145.414
AK3426	ARIZ:AK3426	AKE	North America	Arctoparmelia spp	Chlorolichen	65.4842	-145.414
AK3427	ARIZ:AK3427	AKE	North America	Arctoparmelia spp	Chlorolichen	65.4842	-145.414
AK3428	ARIZ:AK3428	AKE	North America	Arctoparmelia spp	Chlorolichen	65.4842	-145.414
AK3429	ARIZ:AK3429	AKE	North America	Arctoparmelia spp	Chlorolichen	65.4842	-145.414
AK3430	ARIZ:AK3430	AKE	North America	Arctoparmelia spp	Chlorolichen	65.4842	-145.414
AK3431	ARIZ:AK3431	AKE	North America	Arctoparmelia spp	Chlorolichen	65.4842	-145.414
AK3432	ARIZ:AK3432	AKE	North America	Arctoparmelia spp	Chlorolichen	65.4842	-145.414
AK3433	ARIZ:AK3433	AKE	North America	Arctoparmelia spp	Chlorolichen	65.4842	-145.414
AK3434	ARIZ:AK3434	AKE	North America	Arctoparmelia spp	Chlorolichen	65.4842	-145.414
AK3435	ARIZ:AK3435	AKE	North America	Arctoparmelia spp	Chlorolichen	65.4842	-145.414
AK3436	ARIZ:AK3436	AKE	North America	Arctoparmelia spp	Chlorolichen	65.4842	-145.414
AK3437	ARIZ:AK3437	AKE	North America	Arctoparmelia spp	Chlorolichen	65.4842	-145.414
AK3438	ARIZ:AK3438	AKE	North America	Arctoparmelia spp	Chlorolichen	65.4842	-145.414
AK3439	ARIZ:AK3439	AKE	North America	Arctoparmelia spp	Chlorolichen	65.4842	-145.414
AK3440	ARIZ:AK3440	AKE	North America	Arctoparmelia spp	Chlorolichen	65.4842	-145.414
AK3442	ARIZ:AK3442	AKE	North America	Arctoparmelia spp	Chlorolichen	65.4842	-145.414
AK3443	ARIZ:AK3443	AKE	North America	Arctoparmelia spp	Chlorolichen	65.4842	-145.414
AK3444	ARIZ:AK3444	AKE	North America	Arctoparmelia spp	Chlorolichen	65.4842	-145.414
AK3445	ARIZ:AK3445	AKE	North America	Arctoparmelia spp	Chlorolichen	65.4842	-145.414
AK3446	ARIZ:AK3446	AKE	North America	Arctoparmelia spp	Chlorolichen	65.4842	-145.414
AK3447	ARIZ:AK3447	AKE	North America	Arctoparmelia spp	Chlorolichen	65.4842	-145.414
AK3448	ARIZ:AK3448	AKE	North America	Arctoparmelia spp	Chlorolichen	65.4842	-145.414
AK3449	ARIZ:AK3449	AKE	North America	Arctoparmelia spp	Chlorolichen	65.4842	-145.414
AK3450	ARIZ:AK3450	AKE	North America	Arctoparmelia spp	Chlorolichen	65.4842	-145.414
AK3451	ARIZ:AK3451	AKE	North America	Arctoparmelia spp	Chlorolichen	65.4842	-145.414
AK3452	ARIZ:AK3452	AKE	North America	Arctoparmelia spp	Chlorolichen	65.4842	-145.414
AK3453	ARIZ:AK3453	AKE	North America	Arctoparmelia spp	Chlorolichen	65.4842	-145.414
AK3454	ARIZ:AK3454	AKE	North America	Arctoparmelia spp	Chlorolichen	65.4842	-145.414
AK3455	ARIZ:AK3455	AKE	North America	Arctoparmelia spp	Chlorolichen	65.4842	-145.414
AK3457	ARIZ:AK3457	AKE	North America	Arctoparmelia spp	Chlorolichen	65.4842	-145.414
AK3458	ARIZ:AK3458	AKE	North America	Arctoparmelia spp	Chlorolichen	65.4842	-145.414
AK3459	ARIZ:AK3459	AKE	North America	Arctoparmelia spp	Chlorolichen	65.4842	-145.414
AK3460	ARIZ:AK3460	AKE	North America	Arctoparmelia spp	Chlorolichen	65.4842	-145.414
AK3461	ARIZ:AK3461	AKE	North America	Arctoparmelia spp	Chlorolichen	65.4842	-145.414
AK3462	ARIZ:AK3462	AKE	North America	Arctoparmelia spp	Chlorolichen	65.4842	-145.414
AK3463	ARIZ:AK3463	AKE	North America	Arctoparmelia spp	Chlorolichen	65.4842	-145.414
AK3464	ARIZ:AK3464	AKE	North America	Arctoparmelia spp	Chlorolichen	65.4842	-145.414
AK3465	ARIZ:AK3465	AKE	North America	Arctoparmelia spp	Chlorolichen	65.4842	-145.414
AK3466	ARIZ:AK3466	AKE	North America	Arctoparmelia spp	Chlorolichen	65.4842	-145.414
AK3467	ARIZ:AK3467	AKE	North America	Arctoparmelia spp	Chlorolichen	65.4842	-145.414
AK3468	ARIZ:AK3468	AKE	North America	Arctoparmelia spp	Chlorolichen	65.4842	-145.414
AK3469	ARIZ:AK3469	AKE	North America	Arctoparmelia spp	Chlorolichen	65.4842	-145.414
AK3470	ARIZ:AK3470	AKE	North America	Arctoparmelia spp	Chlorolichen	65.4842	-145.414
AK3471	ARIZ:AK3471	AKE	North America	Arctoparmelia spp	Chlorolichen	65.4842	-145.414
AK3472	ARIZ:AK3472	AKE	North America	Arctoparmelia spp	Chlorolichen	65.4842	-145.414
AK3473	ARIZ:AK3473	AKE	North America	Arctoparmelia spp	Chlorolichen	65.4842	-145.414
AK3474	ARIZ:AK3474	AKE	North America	Arctoparmelia spp	Chlorolichen	65.4842	-145.414
AK3475	ARIZ:AK3475	AKE	North America	Arctoparmelia spp	Chlorolichen	65.4842	-145.414
AK3476	ARIZ:AK3476	AKE	North America	Arctoparmelia spp	Chlorolichen	65.4842	-145.414
AK3477	ARIZ:AK3477	AKE	North America	Arctoparmelia spp	Chlorolichen	65.4842	-145.414
AK3478	ARIZ:AK3478	AKE	North America	Arctoparmelia spp	Chlorolichen	65.4842	-145.414
AK3479	ARIZ:AK3479	AKE	North America	Arctoparmelia spp	Chlorolichen	65.4842	-145.414
AK3480	ARIZ:AK3480	AKE	North America	Arctoparmelia spp	Chlorolichen	65.4842	-145.414
AK3481	ARIZ:AK3481	AKE	North America	Arctoparmelia spp	Chlorolichen	65.4842	-145.414
AK3482	ARIZ:AK3482	AKE	North America	Arctoparmelia spp	Chlorolichen	65.4842	-145.414
AK3483	ARIZ:AK3483	AKE	North America	Arctoparmelia spp	Chlorolichen	65.4842	-145.414
AK3484	ARIZ:AK3484	AKE	North America	Arctoparmelia spp	Chlorolichen	65.4842	-145.414
AK3485	ARIZ:AK3485	AKE	North America	Arctoparmelia spp	Chlorolichen	65.4842	-145.414
AK3486	ARIZ:AK3486	AKE	North America	Pleurozium schreberi	Bryophyta	65.4841	-145.417
AK3487	ARIZ:AK3487	AKE	North America	Pleurozium schreberi	Bryophyta	65.4841	-145.417
AK3489	ARIZ:AK3489	AKE	North America	Pleurozium schreberi	Bryophyta	65.4841	-145.417
AK3490	ARIZ:AK3490	AKE	North America	Pleurozium schreberi	Bryophyta	65.4841	-145.417
AK3491	ARIZ:AK3491	AKE	North America	Pleurozium schreberi	Bryophyta	65.4841	-145.417
AK3492	ARIZ:AK3492	AKE	North America	Pleurozium schreberi	Bryophyta	65.4841	-145.417
AK3493	ARIZ:AK3493	AKE	North America	Pleurozium schreberi	Bryophyta	65.4841	-145.417
AK3494	ARIZ:AK3494	AKE	North America	Pleurozium schreberi	Bryophyta	65.4841	-145.417
AK3495	ARIZ:AK3495	AKE	North America	Pleurozium schreberi	Bryophyta	65.4841	-145.417
AK3496	ARIZ:AK3496	AKE	North America	Pleurozium schreberi	Bryophyta	65.4841	-145.417
AK3497	ARIZ:AK3497	AKE	North America	Pleurozium schreberi	Bryophyta	65.4841	-145.417
AK3498	ARIZ:AK3498	AKE	North America	Pleurozium schreberi	Bryophyta	65.4841	-145.417
AK3499	ARIZ:AK3499	AKE	North America	Pleurozium schreberi	Bryophyta	65.4841	-145.417
AK3500	ARIZ:AK3500	AKE	North America	Pleurozium schreberi	Bryophyta	65.4841	-145.417
AK3501	ARIZ:AK3501	AKE	North America	Pleurozium schreberi	Bryophyta	65.4841	-145.417
AK3502	ARIZ:AK3502	AKE	North America	Pleurozium schreberi	Bryophyta	65.4841	-145.417
AK3503	ARIZ:AK3503	AKE	North America	Pleurozium schreberi	Bryophyta	65.4841	-145.417
AK3504	ARIZ:AK3504	AKE	North America	Pleurozium schreberi	Bryophyta	65.4841	-145.417
AK3505	ARIZ:AK3505	AKE	North America	Pleurozium schreberi	Bryophyta	65.4841	-145.417
AK3506	ARIZ:AK3506	AKE	North America	Pleurozium schreberi	Bryophyta	65.4841	-145.417
AK3507	ARIZ:AK3507	AKE	North America	Pleurozium schreberi	Bryophyta	65.4841	-145.417
AK3508	ARIZ:AK3508	AKE	North America	Pleurozium schreberi	Bryophyta	65.4841	-145.417
AK3509	ARIZ:AK3509	AKE	North America	Pleurozium schreberi	Bryophyta	65.4841	-145.417
AK3511	ARIZ:AK3511	AKE	North America	Pleurozium schreberi	Bryophyta	65.4841	-145.417
AK3512	ARIZ:AK3512	AKE	North America	Pleurozium schreberi	Bryophyta	65.4841	-145.417
AK3513	ARIZ:AK3513	AKE	North America	Pleurozium schreberi	Bryophyta	65.4841	-145.417
AK3514	ARIZ:AK3514	AKE	North America	Pleurozium schreberi	Bryophyta	65.4841	-145.417
AK3515	ARIZ:AK3515	AKE	North America	Pleurozium schreberi	Bryophyta	65.4841	-145.417
AK3516	ARIZ:AK3516	AKE	North America	Pleurozium schreberi	Bryophyta	65.4841	-145.417
AK3517	ARIZ:AK3517	AKE	North America	Pleurozium schreberi	Bryophyta	65.4841	-145.417
AK3518	ARIZ:AK3518	AKE	North America	Pleurozium schreberi	Bryophyta	65.4841	-145.417
AK3519	ARIZ:AK3519	AKE	North America	Pleurozium schreberi	Bryophyta	65.4841	-145.417
AK3520	ARIZ:AK3520	AKE	North America	Pleurozium schreberi	Bryophyta	65.4841	-145.417
AK3521	ARIZ:AK3521	AKE	North America	Pleurozium schreberi	Bryophyta	65.4841	-145.417
AK3522	ARIZ:AK3522	AKE	North America	Pleurozium schreberi	Bryophyta	65.4841	-145.417
AK3524	ARIZ:AK3524	AKE	North America	Pleurozium schreberi	Bryophyta	65.4841	-145.417
AK3525	ARIZ:AK3525	AKE	North America	Pleurozium schreberi	Bryophyta	65.4841	-145.417
AK3526	ARIZ:AK3526	AKE	North America	Pleurozium schreberi	Bryophyta	65.4841	-145.417
AK3527	ARIZ:AK3527	AKE	North America	Pleurozium schreberi	Bryophyta	65.4841	-145.417
AK3529	ARIZ:AK3529	AKE	North America	Pleurozium schreberi	Bryophyta	65.4841	-145.417
AK3530	ARIZ:AK3530	AKE	North America	Pleurozium schreberi	Bryophyta	65.4841	-145.417
AK3531	ARIZ:AK3531	AKE	North America	Pleurozium schreberi	Bryophyta	65.4841	-145.417
AK3532	ARIZ:AK3532	AKE	North America	Pleurozium schreberi	Bryophyta	65.4841	-145.417
AK3533	ARIZ:AK3533	AKE	North America	Pleurozium schreberi	Bryophyta	65.4841	-145.417
AK3535	ARIZ:AK3535	AKE	North America	Pleurozium schreberi	Bryophyta	65.4841	-145.417
AK3536	ARIZ:AK3536	AKE	North America	Pleurozium schreberi	Bryophyta	65.4841	-145.417
AK3537	ARIZ:AK3537	AKE	North America	Pleurozium schreberi	Bryophyta	65.4841	-145.417
AK3538	ARIZ:AK3538	AKE	North America	Pleurozium schreberi	Bryophyta	65.4841	-145.417
AK3539	ARIZ:AK3539	AKE	North America	Pleurozium schreberi	Bryophyta	65.4841	-145.417
AK3540	ARIZ:AK3540	AKE	North America	Pleurozium schreberi	Bryophyta	65.4841	-145.417
AK3541	ARIZ:AK3541	AKE	North America	Pleurozium schreberi	Bryophyta	65.4841	-145.417
AK3542	ARIZ:AK3542	AKE	North America	Pleurozium schreberi	Bryophyta	65.4841	-145.417
AK3543	ARIZ:AK3543	AKE	North America	Pleurozium schreberi	Bryophyta	65.4841	-145.417
AK3544	ARIZ:AK3544	AKE	North America	Pleurozium schreberi	Bryophyta	65.4841	-145.417
AK3545	ARIZ:AK3545	AKE	North America	Pleurozium schreberi	Bryophyta	65.4841	-145.417
AK3546	ARIZ:AK3546	AKE	North America	Pleurozium schreberi	Bryophyta	65.4841	-145.417
AK3547	ARIZ:AK3547	AKE	North America	Pleurozium schreberi	Bryophyta	65.4841	-145.417
AK3548	ARIZ:AK3548	AKE	North America	Pleurozium schreberi	Bryophyta	65.4841	-145.417
AK3549	ARIZ:AK3549	AKE	North America	Pleurozium schreberi	Bryophyta	65.4841	-145.417
AK3551	ARIZ:AK3551	AKE	North America	Pleurozium schreberi	Bryophyta	65.4841	-145.417
AK3552	ARIZ:AK3552	AKE	North America	Pleurozium schreberi	Bryophyta	65.4841	-145.417
AK3553	ARIZ:AK3553	AKE	North America	Pleurozium schreberi	Bryophyta	65.4841	-145.417
AK3554	ARIZ:AK3554	AKE	North America	Pleurozium schreberi	Bryophyta	65.4841	-145.417
AK3555	ARIZ:AK3555	AKE	North America	Pleurozium schreberi	Bryophyta	65.4841	-145.417
AK3556	ARIZ:AK3556	AKE	North America	Pleurozium schreberi	Bryophyta	65.4841	-145.417
AK3557	ARIZ:AK3557	AKE	North America	Pleurozium schreberi	Bryophyta	65.4841	-145.417
AK3558	ARIZ:AK3558	AKE	North America	Pleurozium schreberi	Bryophyta	65.4841	-145.417
AK3559	ARIZ:AK3559	AKE	North America	Pleurozium schreberi	Bryophyta	65.4841	-145.417
AK3560	ARIZ:AK3560	AKE	North America	Carex sp	Magnoliophyta	65.4849	-145.416
AK3561	ARIZ:AK3561	AKE	North America	Carex sp	Magnoliophyta	65.4842	-145.414
AK3562	ARIZ:AK3562	AKE	North America	Carex sp	Magnoliophyta	65.4842	-145.414
AK3563	ARIZ:AK3563	AKE	North America	Salix pulchra	Magnoliophyta	65.4842	-145.414
AK3565	ARIZ:AK3565	AKE	North America	Salix pulchra	Magnoliophyta	65.4842	-145.414
AK3566	ARIZ:AK3566	AKE	North America	Salix pulchra	Magnoliophyta	65.4842	-145.414
AK3567	ARIZ:AK3567	AKE	North America	Salix pulchra	Magnoliophyta	65.4842	-145.414
AK3569	ARIZ:AK3569	AKE	North America	Salix pulchra	Magnoliophyta	65.4842	-145.414
AK3570	ARIZ:AK3570	AKE	North America	Salix pulchra	Magnoliophyta	65.4842	-145.414
AK3573	ARIZ:AK3573	AKE	North America	Picea glauca	Pinophyta	65.4842	-145.414
AK3574	ARIZ:AK3574	AKE	North America	Picea glauca	Pinophyta	65.4842	-145.414
AK3575	ARIZ:AK3575	AKE	North America	Picea glauca	Pinophyta	65.4842	-145.414
AK3576	ARIZ:AK3576	AKE	North America	Picea glauca	Pinophyta	65.4842	-145.414
AK3580	ARIZ:AK3580	AKE	North America	Picea glauca	Pinophyta	65.4842	-145.414
AK3582	ARIZ:AK3582	AKE	North America	Picea glauca	Pinophyta	65.4842	-145.414
AK3583	ARIZ:AK3583	AKE	North America	Picea glauca	Pinophyta	65.4842	-145.414
AK3584	ARIZ:AK3584	AKE	North America	Picea glauca	Pinophyta	65.4842	-145.414
AK3586	ARIZ:AK3586	AKE	North America	Picea glauca	Pinophyta	65.4842	-145.414
AK3594	ARIZ:AK3594	AKE	North America	Picea glauca	Pinophyta	65.4842	-145.414
AK3596	ARIZ:AK3596	AKE	North America	Picea glauca	Pinophyta	65.4842	-145.414
AK3599	ARIZ:AK3599	AKE	North America	Picea glauca	Pinophyta	65.4842	-145.414
AK3600	ARIZ:AK3600	AKE	North America	Picea glauca	Pinophyta	65.4842	-145.414
AK3602	ARIZ:AK3602	AKE	North America	Picea glauca	Pinophyta	65.4849	-145.416
AK3604	ARIZ:AK3604	AKE	North America	Picea glauca	Pinophyta	65.4849	-145.416
AK3605	ARIZ:AK3605	AKE	North America	Picea glauca	Pinophyta	65.4849	-145.416
AK3606	ARIZ:AK3606	AKE	North America	Picea glauca	Pinophyta	65.4849	-145.416
AK3607	ARIZ:AK3607	AKE	North America	Picea glauca	Pinophyta	65.4849	-145.416
AK3608	ARIZ:AK3608	AKE	North America	Picea glauca	Pinophyta	65.4849	-145.416
AK3609	ARIZ:AK3609	AKE	North America	Betula nana	Magnoliophyta	65.4841	-145.417
AK3610	ARIZ:AK3610	AKE	North America	Betula nana	Magnoliophyta	65.4841	-145.417
AK3611	ARIZ:AK3611	AKE	North America	Betula nana	Magnoliophyta	65.4841	-145.417
AK3612	ARIZ:AK3612	AKE	North America	Betula nana	Magnoliophyta	65.4842	-145.414
AK3613	ARIZ:AK3613	AKE	North America	Betula nana	Magnoliophyta	65.4842	-145.414
AK3614	ARIZ:AK3614	AKE	North America	Betula nana	Magnoliophyta	65.4842	-145.414
AK3615	ARIZ:AK3615	AKE	North America	Betula nana	Magnoliophyta	65.4842	-145.414
AK3616	ARIZ:AK3616	AKE	North America	Empetrum nigrum	Magnoliophyta	65.4841	-145.417
AK3617	ARIZ:AK3617	AKE	North America	Empetrum nigrum	Magnoliophyta	65.4841	-145.417
AK3618	ARIZ:AK3618	AKE	North America	Empetrum nigrum	Magnoliophyta	65.4842	-145.414
AK3621	ARIZ:AK3621	AKE	North America	Rhizocarpon cf geographicum	Chlorolichen	65.4841	-145.417
AK3622	ARIZ:AK3622	AKE	North America	Rhizocarpon cf geographicum	Chlorolichen	65.4841	-145.417
AK3623	ARIZ:AK3623	AKE	North America	Rhizocarpon cf geographicum	Chlorolichen	65.4841	-145.417
AK3624	ARIZ:AK3624	AKE	North America	Rhizocarpon cf geographicum	Chlorolichen	65.4841	-145.417
AK3625	ARIZ:AK3625	AKE	North America	Rhizocarpon cf geographicum	Chlorolichen	65.4841	-145.417
AK3626	ARIZ:AK3626	AKE	North America	Rhizocarpon cf geographicum	Chlorolichen	65.4841	-145.417
AK3627	ARIZ:AK3627	AKE	North America	Rhizocarpon cf geographicum	Chlorolichen	65.4841	-145.417
AK3628	ARIZ:AK3628	AKE	North America	Rhizocarpon cf geographicum	Chlorolichen	65.4841	-145.417
AK3629	ARIZ:AK3629	AKE	North America	Rhizocarpon cf geographicum	Chlorolichen	65.4841	-145.417
AK3630	ARIZ:AK3630	AKE	North America	Rhizocarpon cf geographicum	Chlorolichen	65.4841	-145.417
AK3631	ARIZ:AK3631	AKE	North America	Rhizocarpon cf geographicum	Chlorolichen	65.4841	-145.417
AK3632	ARIZ:AK3632	AKE	North America	Rhizocarpon cf geographicum	Chlorolichen	65.4841	-145.417
AK3633	ARIZ:AK3633	AKE	North America	Rhizocarpon cf geographicum	Chlorolichen	65.4841	-145.417
AK3634	ARIZ:AK3634	AKE	North America	Rhizocarpon cf geographicum	Chlorolichen	65.4841	-145.417
AK3635	ARIZ:AK3635	AKE	North America	Rhizocarpon cf geographicum	Chlorolichen	65.4841	-145.417
AK3636	ARIZ:AK3636	AKE	North America	Rhizocarpon cf geographicum	Chlorolichen	65.4841	-145.417
AK3637	ARIZ:AK3637	AKE	North America	Rhizocarpon cf geographicum	Chlorolichen	65.4841	-145.417
AK3638	ARIZ:AK3638	AKE	North America	Rhizocarpon cf geographicum	Chlorolichen	65.4841	-145.417
AK3639	ARIZ:AK3639	AKE	North America	Rhizocarpon cf geographicum	Chlorolichen	65.4841	-145.417
AK3640	ARIZ:AK3640	AKE	North America	Rhizocarpon cf geographicum	Chlorolichen	65.4841	-145.417
AK3641	ARIZ:AK3641	AKE	North America	Rhizocarpon cf geographicum	Chlorolichen	65.4841	-145.417
AK3642	ARIZ:AK3642	AKE	North America	Rhizocarpon cf geographicum	Chlorolichen	65.4841	-145.417
AK3643	ARIZ:AK3643	AKE	North America	Rhizocarpon cf geographicum	Chlorolichen	65.4841	-145.417
AK3644	ARIZ:AK3644	AKE	North America	Rhizocarpon cf geographicum	Chlorolichen	65.4841	-145.417
AK3645	ARIZ:AK3645	AKE	North America	Rhizocarpon cf geographicum	Chlorolichen	65.4841	-145.417
AK3649	ARIZ:AK3649	AKE	North America	Rhizocarpon cf geographicum	Chlorolichen	65.4841	-145.417
AK3650	ARIZ:AK3650	AKE	North America	Rhizocarpon cf geographicum	Chlorolichen	65.4841	-145.417
AK3651	ARIZ:AK3651	AKE	North America	Rhizocarpon cf geographicum	Chlorolichen	65.4841	-145.417
AK3652	ARIZ:AK3652	AKE	North America	Rhizocarpon cf geographicum	Chlorolichen	65.4841	-145.417
AK3653	ARIZ:AK3653	AKE	North America	Rhizocarpon cf geographicum	Chlorolichen	65.4841	-145.417
AK3654	ARIZ:AK3654	AKE	North America	Rhizocarpon cf geographicum	Chlorolichen	65.4841	-145.417
AK3655	ARIZ:AK3655	AKE	North America	Rhizocarpon cf geographicum	Chlorolichen	65.4841	-145.417
AK3656	ARIZ:AK3656	AKE	North America	Rhizocarpon cf geographicum	Chlorolichen	65.4841	-145.417
AK3657	ARIZ:AK3657	AKE	North America	Rhizocarpon cf geographicum	Chlorolichen	65.4841	-145.417
AK3658	ARIZ:AK3658	AKE	North America	Rhizocarpon cf geographicum	Chlorolichen	65.4841	-145.417
AK3659	ARIZ:AK3659	AKE	North America	Rhizocarpon cf geographicum	Chlorolichen	65.4841	-145.417
AK3660	ARIZ:AK3660	AKE	North America	Rhizocarpon cf geographicum	Chlorolichen	65.4841	-145.417
AK3661	ARIZ:AK3661	AKE	North America	Rhizocarpon cf geographicum	Chlorolichen	65.4841	-145.417
AK3662	ARIZ:AK3662	AKE	North America	Rhizocarpon cf geographicum	Chlorolichen	65.4841	-145.417
AK3663	ARIZ:AK3663	AKE	North America	Rhizocarpon cf geographicum	Chlorolichen	65.4841	-145.417
AK3664	ARIZ:AK3664	AKE	North America	Rhizocarpon cf geographicum	Chlorolichen	65.4841	-145.417
AK3665	ARIZ:AK3665	AKE	North America	Rhizocarpon cf geographicum	Chlorolichen	65.4841	-145.417
AK3666	ARIZ:AK3666	AKE	North America	Rhizocarpon cf geographicum	Chlorolichen	65.4841	-145.417
AK3667	ARIZ:AK3667	AKE	North America	Rhizocarpon cf geographicum	Chlorolichen	65.4841	-145.417
AK3668	ARIZ:AK3668	AKE	North America	Rhizocarpon cf geographicum	Chlorolichen	65.4841	-145.417
AK3669	ARIZ:AK3669	AKE	North America	Rhizocarpon cf geographicum	Chlorolichen	65.4841	-145.417
AK3670	ARIZ:AK3670	AKE	North America	Rhizocarpon cf geographicum	Chlorolichen	65.4841	-145.417
AK3671	ARIZ:AK3671	AKE	North America	Rhizocarpon cf geographicum	Chlorolichen	65.4841	-145.417
AK3672	ARIZ:AK3672	AKE	North America	Rhizocarpon cf geographicum	Chlorolichen	65.4841	-145.417
AK3673	ARIZ:AK3673	AKE	North America	Rhizocarpon cf geographicum	Chlorolichen	65.4841	-145.417
AK3674	ARIZ:AK3674	AKE	North America	Rhizocarpon cf geographicum	Chlorolichen	65.4841	-145.417
AK3675	ARIZ:AK3675	AKE	North America	Rhizocarpon cf geographicum	Chlorolichen	65.4841	-145.417
AK3676	ARIZ:AK3676	AKE	North America	Rhizocarpon cf geographicum	Chlorolichen	65.4841	-145.417
AK3677	ARIZ:AK3677	AKE	North America	Rhizocarpon cf geographicum	Chlorolichen	65.4841	-145.417
AK3678	ARIZ:AK3678	AKE	North America	Rhizocarpon cf geographicum	Chlorolichen	65.4841	-145.417
AK3679	ARIZ:AK3679	AKE	North America	Rhizocarpon cf geographicum	Chlorolichen	65.4841	-145.417
AK3680	ARIZ:AK3680	AKE	North America	Rhizocarpon cf geographicum	Chlorolichen	65.4841	-145.417
AK3681	ARIZ:AK3681	AKE	North America	Rhizocarpon cf geographicum	Chlorolichen	65.4841	-145.417
AK3682	ARIZ:AK3682	AKE	North America	Rhizocarpon cf geographicum	Chlorolichen	65.4841	-145.417
AK3683	ARIZ:AK3683	AKE	North America	Rhizocarpon cf geographicum	Chlorolichen	65.4841	-145.417
AK3684	ARIZ:AK3684	AKE	North America	Rhizocarpon cf geographicum	Chlorolichen	65.4841	-145.417
AK3685	ARIZ:AK3685	AKE	North America	Rhizocarpon cf geographicum	Chlorolichen	65.4841	-145.417
AK3686	ARIZ:AK3686	AKE	North America	Rhizocarpon cf geographicum	Chlorolichen	65.4841	-145.417
AK3687	ARIZ:AK3687	AKE	North America	Rhizocarpon cf geographicum	Chlorolichen	65.4841	-145.417
AK3688	ARIZ:AK3688	AKE	North America	Rhizocarpon cf geographicum	Chlorolichen	65.4841	-145.417
AK3689	ARIZ:AK3689	AKE	North America	Rhizocarpon cf geographicum	Chlorolichen	65.4841	-145.417
AK3690	ARIZ:AK3690	AKE	North America	Rhizocarpon cf geographicum	Chlorolichen	65.4841	-145.417
AK3691	ARIZ:AK3691	AKE	North America	Rhizocarpon cf geographicum	Chlorolichen	65.4841	-145.417
AK3692	ARIZ:AK3692	AKE	North America	Rhizocarpon cf geographicum	Chlorolichen	65.4841	-145.417
AK3693	ARIZ:AK3693	AKE	North America	Rhizocarpon cf geographicum	Chlorolichen	65.4841	-145.417
AK3694	ARIZ:AK3694	AKE	North America	Rhizocarpon cf geographicum	Chlorolichen	65.4841	-145.417
AK3695	ARIZ:AK3695	AKE	North America	Rhizocarpon cf geographicum	Chlorolichen	65.4841	-145.417
AK3696	ARIZ:AK3696	AKE	North America	Rhizocarpon cf geographicum	Chlorolichen	65.4841	-145.417
AK3697A	ARIZ:AK3697A	AKE	North America	Rhizocarpon cf geographicum	Chlorolichen	65.4841	-145.417
AK3697B	ARIZ:AK3697B	AKE	North America	Rhizocarpon cf geographicum	Chlorolichen	65.4841	-145.417
AK3698	ARIZ:AK3698	AKE	North America	Rhizocarpon cf geographicum	Chlorolichen	65.4841	-145.417
AK3700	ARIZ:AK3700	AKE	North America	Rhizocarpon cf geographicum	Chlorolichen	65.4841	-145.417
AK3701	ARIZ:AK3701	AKE	North America	Rhizocarpon cf geographicum	Chlorolichen	65.4841	-145.417
AK3702	ARIZ:AK3702	AKE	North America	Rhizocarpon cf geographicum	Chlorolichen	65.4841	-145.417
AK3704	ARIZ:AK3704	AKE	North America	Rhizocarpon cf geographicum	Chlorolichen	65.4841	-145.417
AK3705	ARIZ:AK3705	AKE	North America	Rhizocarpon cf geographicum	Chlorolichen	65.4841	-145.417
AK3706	ARIZ:AK3706	AKE	North America	Umbilicaria hyperborea	Chlorolichen	65.4842	-145.414
AK3707	ARIZ:AK3707	AKE	North America	Umbilicaria hyperborea	Chlorolichen	65.4842	-145.414
AK3708	ARIZ:AK3708	AKE	North America	Umbilicaria hyperborea	Chlorolichen	65.4842	-145.414
AK3709	ARIZ:AK3709	AKE	North America	Umbilicaria hyperborea	Chlorolichen	65.4842	-145.414
AK3710	ARIZ:AK3710	AKE	North America	Umbilicaria hyperborea	Chlorolichen	65.4842	-145.414
AK3711	ARIZ:AK3711	AKE	North America	Umbilicaria hyperborea	Chlorolichen	65.4842	-145.414
AK3712	ARIZ:AK3712	AKE	North America	Umbilicaria hyperborea	Chlorolichen	65.4842	-145.414
AK3713	ARIZ:AK3713	AKE	North America	Umbilicaria hyperborea	Chlorolichen	65.4842	-145.414
AK3714	ARIZ:AK3714	AKE	North America	Umbilicaria hyperborea	Chlorolichen	65.4842	-145.414
AK3715	ARIZ:AK3715	AKE	North America	Umbilicaria hyperborea	Chlorolichen	65.4842	-145.414
AK3716	ARIZ:AK3716	AKE	North America	Umbilicaria hyperborea	Chlorolichen	65.4842	-145.414
AK3717	ARIZ:AK3717	AKE	North America	Umbilicaria hyperborea	Chlorolichen	65.4842	-145.414
AK3718	ARIZ:AK3718	AKE	North America	Umbilicaria hyperborea	Chlorolichen	65.4842	-145.414
AK3719	ARIZ:AK3719	AKE	North America	Umbilicaria hyperborea	Chlorolichen	65.4842	-145.414
AK3720	ARIZ:AK3720	AKE	North America	Umbilicaria hyperborea	Chlorolichen	65.4842	-145.414
AK3721	ARIZ:AK3721	AKE	North America	Umbilicaria hyperborea	Chlorolichen	65.4842	-145.414
AK3722	ARIZ:AK3722	AKE	North America	Umbilicaria hyperborea	Chlorolichen	65.4842	-145.414
AK3723	ARIZ:AK3723	AKE	North America	Umbilicaria hyperborea	Chlorolichen	65.4842	-145.414
AK3724	ARIZ:AK3724	AKE	North America	Umbilicaria hyperborea	Chlorolichen	65.4842	-145.414
AK3725	ARIZ:AK3725	AKE	North America	Umbilicaria hyperborea	Chlorolichen	65.4842	-145.414
AK3726	ARIZ:AK3726	AKE	North America	Umbilicaria hyperborea	Chlorolichen	65.4842	-145.414
AK3727	ARIZ:AK3727	AKE	North America	Umbilicaria hyperborea	Chlorolichen	65.4842	-145.414
AK3728	ARIZ:AK3728	AKE	North America	Umbilicaria hyperborea	Chlorolichen	65.4842	-145.414
AK3729	ARIZ:AK3729	AKE	North America	Umbilicaria hyperborea	Chlorolichen	65.4842	-145.414
AK3730	ARIZ:AK3730	AKE	North America	Umbilicaria hyperborea	Chlorolichen	65.4842	-145.414
AK3731	ARIZ:AK3731	AKE	North America	Umbilicaria hyperborea	Chlorolichen	65.4842	-145.414
AK3732	ARIZ:AK3732	AKE	North America	Umbilicaria hyperborea	Chlorolichen	65.4842	-145.414
AK3734	ARIZ:AK3734	AKE	North America	Umbilicaria hyperborea	Chlorolichen	65.4842	-145.414
AK3736	ARIZ:AK3736	AKE	North America	Umbilicaria hyperborea	Chlorolichen	65.4842	-145.414
AK3737	ARIZ:AK3737	AKE	North America	Umbilicaria hyperborea	Chlorolichen	65.4842	-145.414
AK3738	ARIZ:AK3738	AKE	North America	Umbilicaria hyperborea	Chlorolichen	65.4842	-145.414
AK3739	ARIZ:AK3739	AKE	North America	Umbilicaria hyperborea	Chlorolichen	65.4842	-145.414
AK3740	ARIZ:AK3740	AKE	North America	Umbilicaria hyperborea	Chlorolichen	65.4842	-145.414
AK3741	ARIZ:AK3741	AKE	North America	Umbilicaria hyperborea	Chlorolichen	65.4842	-145.414
AK3742	ARIZ:AK3742	AKE	North America	Umbilicaria hyperborea	Chlorolichen	65.4842	-145.414
AK3743	ARIZ:AK3743	AKE	North America	Umbilicaria hyperborea	Chlorolichen	65.4842	-145.414
AK3744	ARIZ:AK3744	AKE	North America	Umbilicaria hyperborea	Chlorolichen	65.4842	-145.414
AK3745	ARIZ:AK3745	AKE	North America	Umbilicaria hyperborea	Chlorolichen	65.4842	-145.414
AK3746	ARIZ:AK3746	AKE	North America	Umbilicaria hyperborea	Chlorolichen	65.4842	-145.414
AK3747	ARIZ:AK3747	AKE	North America	Umbilicaria hyperborea	Chlorolichen	65.4842	-145.414
AK3748	ARIZ:AK3748	AKE	North America	Umbilicaria hyperborea	Chlorolichen	65.4842	-145.414
AK3749	ARIZ:AK3749	AKE	North America	Umbilicaria hyperborea	Chlorolichen	65.4842	-145.414
AK3750	ARIZ:AK3750	AKE	North America	Umbilicaria hyperborea	Chlorolichen	65.4842	-145.414
AK3751	ARIZ:AK3751	AKE	North America	Umbilicaria hyperborea	Chlorolichen	65.4842	-145.414
AK3752	ARIZ:AK3752	AKE	North America	Umbilicaria hyperborea	Chlorolichen	65.4842	-145.414
AK3753	ARIZ:AK3753	AKE	North America	Umbilicaria hyperborea	Chlorolichen	65.4842	-145.414
AK3754	ARIZ:AK3754	AKE	North America	Umbilicaria hyperborea	Chlorolichen	65.4842	-145.414
AK3755	ARIZ:AK3755	AKE	North America	Umbilicaria hyperborea	Chlorolichen	65.4842	-145.414
AK3756	ARIZ:AK3756	AKE	North America	Umbilicaria hyperborea	Chlorolichen	65.4842	-145.414
AK3757	ARIZ:AK3757	AKE	North America	Umbilicaria hyperborea	Chlorolichen	65.4842	-145.414
AK3758	ARIZ:AK3758	AKE	North America	Umbilicaria hyperborea	Chlorolichen	65.4842	-145.414
AK3759	ARIZ:AK3759	AKE	North America	Umbilicaria hyperborea	Chlorolichen	65.4842	-145.414
AK3760	ARIZ:AK3760	AKE	North America	Umbilicaria hyperborea	Chlorolichen	65.4842	-145.414
AK3762	ARIZ:AK3762	AKE	North America	Umbilicaria hyperborea	Chlorolichen	65.4842	-145.414
AK3764	ARIZ:AK3764	AKE	North America	Umbilicaria hyperborea	Chlorolichen	65.4842	-145.414
AK3765	ARIZ:AK3765	AKE	North America	Umbilicaria hyperborea	Chlorolichen	65.4842	-145.414
AK3766	ARIZ:AK3766	AKE	North America	Umbilicaria hyperborea	Chlorolichen	65.4842	-145.414
AK3767	ARIZ:AK3767	AKE	North America	Umbilicaria hyperborea	Chlorolichen	65.4842	-145.414
AK3768	ARIZ:AK3768	AKE	North America	Umbilicaria hyperborea	Chlorolichen	65.4842	-145.414
AK3769	ARIZ:AK3769	AKE	North America	Umbilicaria hyperborea	Chlorolichen	65.4842	-145.414
AK3770	ARIZ:AK3770	AKE	North America	Umbilicaria hyperborea	Chlorolichen	65.4842	-145.414
AK3771	ARIZ:AK3771	AKE	North America	Umbilicaria hyperborea	Chlorolichen	65.4842	-145.414
AK3772	ARIZ:AK3772	AKE	North America	Umbilicaria hyperborea	Chlorolichen	65.4842	-145.414
AK3774	ARIZ:AK3774	AKE	North America	Umbilicaria hyperborea	Chlorolichen	65.4842	-145.414
AK3775	ARIZ:AK3775	AKE	North America	Umbilicaria hyperborea	Chlorolichen	65.4842	-145.414
AK3776	ARIZ:AK3776	AKE	North America	Umbilicaria hyperborea	Chlorolichen	65.4842	-145.414
AK3777	ARIZ:AK3777	AKE	North America	Umbilicaria hyperborea	Chlorolichen	65.4842	-145.414
AK3778	ARIZ:AK3778	AKE	North America	Umbilicaria hyperborea	Chlorolichen	65.4842	-145.414
AK3779	ARIZ:AK3779	AKE	North America	Cladonia rangiferina	Chlorolichen	65.4849	-145.416
AK3781	ARIZ:AK3781	AKE	North America	Cladonia rangiferina	Chlorolichen	65.4849	-145.416
AK3782	ARIZ:AK3782	AKE	North America	Cladonia rangiferina	Chlorolichen	65.4849	-145.416
AK3783	ARIZ:AK3783	AKE	North America	Cladonia rangiferina	Chlorolichen	65.4849	-145.416
AK3784	ARIZ:AK3784	AKE	North America	Cladonia rangiferina	Chlorolichen	65.4849	-145.416
AK3785	ARIZ:AK3785	AKE	North America	Cladonia rangiferina	Chlorolichen	65.4849	-145.416
AK3786	ARIZ:AK3786	AKE	North America	Cladonia rangiferina	Chlorolichen	65.4849	-145.416
AK3787	ARIZ:AK3787	AKE	North America	Cladonia rangiferina	Chlorolichen	65.4849	-145.416
AK3788	ARIZ:AK3788	AKE	North America	Cladonia rangiferina	Chlorolichen	65.4849	-145.416
AK3789	ARIZ:AK3789	AKE	North America	Cladonia rangiferina	Chlorolichen	65.4849	-145.416
AK3790	ARIZ:AK3790	AKE	North America	Cladonia rangiferina	Chlorolichen	65.4849	-145.416
AK3791	ARIZ:AK3791	AKE	North America	Cladonia rangiferina	Chlorolichen	65.4849	-145.416
AK3792	ARIZ:AK3792	AKE	North America	Cladonia rangiferina	Chlorolichen	65.4849	-145.416
AK3793	ARIZ:AK3793	AKE	North America	Cladonia rangiferina	Chlorolichen	65.4849	-145.416
AK3794	ARIZ:AK3794	AKE	North America	Cladonia rangiferina	Chlorolichen	65.4849	-145.416
AK3795	ARIZ:AK3795	AKE	North America	Cladonia rangiferina	Chlorolichen	65.4849	-145.416
AK3796	ARIZ:AK3796	AKE	North America	Cladonia rangiferina	Chlorolichen	65.4849	-145.416
AK3797	ARIZ:AK3797	AKE	North America	Cladonia rangiferina	Chlorolichen	65.4849	-145.416
AK3799	ARIZ:AK3799	AKE	North America	Cladonia rangiferina	Chlorolichen	65.4849	-145.416
AK3800	ARIZ:AK3800	AKE	North America	Cladonia rangiferina	Chlorolichen	65.4849	-145.416
AK3801	ARIZ:AK3801	AKE	North America	Cladonia rangiferina	Chlorolichen	65.4849	-145.416
AK3802	ARIZ:AK3802	AKE	North America	Cladonia rangiferina	Chlorolichen	65.4849	-145.416
AK3803	ARIZ:AK3803	AKE	North America	Cladonia rangiferina	Chlorolichen	65.4849	-145.416
AK3804	ARIZ:AK3804	AKE	North America	Cladonia rangiferina	Chlorolichen	65.4849	-145.416
AK3805	ARIZ:AK3805	AKE	North America	Cladonia rangiferina	Chlorolichen	65.4849	-145.416
AK3806	ARIZ:AK3806	AKE	North America	Cladonia rangiferina	Chlorolichen	65.4849	-145.416
AK3807	ARIZ:AK3807	AKE	North America	Cladonia rangiferina	Chlorolichen	65.4849	-145.416
AK3808	ARIZ:AK3808	AKE	North America	Cladonia rangiferina	Chlorolichen	65.4849	-145.416
AK3809	ARIZ:AK3809	AKE	North America	Cladonia rangiferina	Chlorolichen	65.4849	-145.416
AK3810	ARIZ:AK3810	AKE	North America	Cladonia rangiferina	Chlorolichen	65.4849	-145.416
AK3811	ARIZ:AK3811	AKE	North America	Cladonia rangiferina	Chlorolichen	65.4849	-145.416
AK3812	ARIZ:AK3812	AKE	North America	Cladonia rangiferina	Chlorolichen	65.4849	-145.416
AK3813	ARIZ:AK3813	AKE	North America	Cladonia rangiferina	Chlorolichen	65.4849	-145.416
AK3814	ARIZ:AK3814	AKE	North America	Cladonia rangiferina	Chlorolichen	65.4849	-145.416
AK3815	ARIZ:AK3815	AKE	North America	Cladonia rangiferina	Chlorolichen	65.4849	-145.416
AK3816	ARIZ:AK3816	AKE	North America	Cladonia rangiferina	Chlorolichen	65.4849	-145.416
AK3817	ARIZ:AK3817	AKE	North America	Cladonia rangiferina	Chlorolichen	65.4849	-145.416
AK3818	ARIZ:AK3818	AKE	North America	Cladonia rangiferina	Chlorolichen	65.4849	-145.416
AK3819	ARIZ:AK3819	AKE	North America	Cladonia rangiferina	Chlorolichen	65.4849	-145.416
AK3820	ARIZ:AK3820	AKE	North America	Cladonia rangiferina	Chlorolichen	65.4849	-145.416
AK3821	ARIZ:AK3821	AKE	North America	Cladonia rangiferina	Chlorolichen	65.4849	-145.416
AK3822	ARIZ:AK3822	AKE	North America	Cladonia rangiferina	Chlorolichen	65.4849	-145.416
AK3823	ARIZ:AK3823	AKE	North America	Cladonia rangiferina	Chlorolichen	65.4849	-145.416
AK3826	ARIZ:AK3826	AKE	North America	Cladonia rangiferina	Chlorolichen	65.4849	-145.416
AK3827	ARIZ:AK3827	AKE	North America	Cladonia rangiferina	Chlorolichen	65.4849	-145.416
AK3828	ARIZ:AK3828	AKE	North America	Cladonia rangiferina	Chlorolichen	65.4849	-145.416
AK3829	ARIZ:AK3829	AKE	North America	Cladonia rangiferina	Chlorolichen	65.4849	-145.416
AK3830	ARIZ:AK3830	AKE	North America	Cladonia rangiferina	Chlorolichen	65.4849	-145.416
AK3831	ARIZ:AK3831	AKE	North America	Cladonia rangiferina	Chlorolichen	65.4849	-145.416
AK3833	ARIZ:AK3833	AKE	North America	Cladonia rangiferina	Chlorolichen	65.4849	-145.416
AK3834	ARIZ:AK3834	AKE	North America	Cladonia rangiferina	Chlorolichen	65.4849	-145.416
AK3835	ARIZ:AK3835	AKE	North America	Cladonia rangiferina	Chlorolichen	65.4849	-145.416
AK3836	ARIZ:AK3836	AKE	North America	Cladonia rangiferina	Chlorolichen	65.4849	-145.416
AK3838	ARIZ:AK3838	AKE	North America	Cladonia rangiferina	Chlorolichen	65.4849	-145.416
AK3839	ARIZ:AK3839	AKE	North America	Cladonia rangiferina	Chlorolichen	65.4849	-145.416
AK3840	ARIZ:AK3840	AKE	North America	Cladonia rangiferina	Chlorolichen	65.4849	-145.416
AK3841	ARIZ:AK3841	AKE	North America	Cladonia rangiferina	Chlorolichen	65.4849	-145.416
AK3843	ARIZ:AK3843	AKE	North America	Cladonia rangiferina	Chlorolichen	65.4849	-145.416
AK3844	ARIZ:AK3844	AKE	North America	Cladonia rangiferina	Chlorolichen	65.4849	-145.416
AK3845	ARIZ:AK3845	AKE	North America	Cladonia rangiferina	Chlorolichen	65.4849	-145.416
AK3847	ARIZ:AK3847	AKE	North America	Cladonia rangiferina	Chlorolichen	65.4849	-145.416
AK3849	ARIZ:AK3849	AKE	North America	Cladonia rangiferina	Chlorolichen	65.4849	-145.416
AK3850	ARIZ:AK3850	AKE	North America	Cladonia rangiferina	Chlorolichen	65.4849	-145.416
AK3851	ARIZ:AK3851	AKE	North America	Cladonia rangiferina	Chlorolichen	65.4849	-145.416
AK3852	ARIZ:AK3852	AKE	North America	Cladonia rangiferina	Chlorolichen	65.4849	-145.416
AK3853	ARIZ:AK3853	AKE	North America	Cladonia rangiferina	Chlorolichen	65.4849	-145.416
AK3854	ARIZ:AK3854	AKE	North America	Cladonia rangiferina	Chlorolichen	65.4849	-145.416
AK3855	ARIZ:AK3855	AKE	North America	Cladonia rangiferina	Chlorolichen	65.4849	-145.416
AK3856	ARIZ:AK3856	AKE	North America	Cladonia rangiferina	Chlorolichen	65.4849	-145.416
AK3857	ARIZ:AK3857	AKE	North America	Cladonia rangiferina	Chlorolichen	65.4849	-145.416
AK3858	ARIZ:AK3858	AKE	North America	Cladonia rangiferina	Chlorolichen	65.4849	-145.416
AK3859	ARIZ:AK3859	AKE	North America	Cladonia rangiferina	Chlorolichen	65.4849	-145.416
AK3860	ARIZ:AK3860	AKE	North America	Cladonia rangiferina	Chlorolichen	65.4849	-145.416
AK3861	ARIZ:AK3861	AKE	North America	Cladonia rangiferina	Chlorolichen	65.4849	-145.416
AK3862	ARIZ:AK3862	AKE	North America	Cladonia rangiferina	Chlorolichen	65.4849	-145.416
AK3863	ARIZ:AK3863	AKE	North America	Cladonia rangiferina	Chlorolichen	65.4849	-145.416
AK3865	ARIZ:AK3865	AKE	North America	Cladonia rangiferina	Chlorolichen	65.4849	-145.416
AK3866	ARIZ:AK3866	AKE	North America	Cladonia rangiferina	Chlorolichen	65.4849	-145.416
AK3867	ARIZ:AK3867	AKE	North America	Cladonia rangiferina	Chlorolichen	65.4849	-145.416
AK3868	ARIZ:AK3868	AKE	North America	Cladonia rangiferina	Chlorolichen	65.4849	-145.416
AK3869	ARIZ:AK3869	AKE	North America	Cladonia rangiferina	Chlorolichen	65.4849	-145.416
AK3870	ARIZ:AK3870	AKE	North America	Cladonia rangiferina	Chlorolichen	65.4849	-145.416
AK3871	ARIZ:AK3871	AKE	North America	Cladonia rangiferina	Chlorolichen	65.4849	-145.416
AK3872	ARIZ:AK3872	AKE	North America	Cladonia rangiferina	Chlorolichen	65.4849	-145.416
AK3873	ARIZ:AK3873	AKE	North America	Cladonia rangiferina	Chlorolichen	65.4849	-145.416
AK3874	ARIZ:AK3874	AKE	North America	Arctoparmelia spp	Chlorolichen	65.4841	-145.417
AK3875	ARIZ:AK3875	AKE	North America	Arctoparmelia spp	Chlorolichen	65.4841	-145.417
AK3876	ARIZ:AK3876	AKE	North America	Arctoparmelia spp	Chlorolichen	65.4841	-145.417
AK3877	ARIZ:AK3877	AKE	North America	Arctoparmelia spp	Chlorolichen	65.4841	-145.417
AK3878	ARIZ:AK3878	AKE	North America	Arctoparmelia spp	Chlorolichen	65.4841	-145.417
AK3879	ARIZ:AK3879	AKE	North America	Arctoparmelia spp	Chlorolichen	65.4841	-145.417
AK3880	ARIZ:AK3880	AKE	North America	Arctoparmelia spp	Chlorolichen	65.4841	-145.417
AK3882	ARIZ:AK3882	AKE	North America	Arctoparmelia spp	Chlorolichen	65.4841	-145.417
AK3883	ARIZ:AK3883	AKE	North America	Arctoparmelia spp	Chlorolichen	65.4841	-145.417
AK3884	ARIZ:AK3884	AKE	North America	Arctoparmelia spp	Chlorolichen	65.4841	-145.417
AK3885	ARIZ:AK3885	AKE	North America	Arctoparmelia spp	Chlorolichen	65.4841	-145.417
AK3886	ARIZ:AK3886	AKE	North America	Arctoparmelia spp	Chlorolichen	65.4841	-145.417
AK3887	ARIZ:AK3887	AKE	North America	Arctoparmelia spp	Chlorolichen	65.4841	-145.417
AK3889	ARIZ:AK3889	AKE	North America	Arctoparmelia spp	Chlorolichen	65.4841	-145.417
AK3890	ARIZ:AK3890	AKE	North America	Arctoparmelia spp	Chlorolichen	65.4841	-145.417
AK3891	ARIZ:AK3891	AKE	North America	Arctoparmelia spp	Chlorolichen	65.4841	-145.417
AK3892	ARIZ:AK3892	AKE	North America	Arctoparmelia spp	Chlorolichen	65.4841	-145.417
AK3893	ARIZ:AK3893	AKE	North America	Arctoparmelia spp	Chlorolichen	65.4841	-145.417
AK3894	ARIZ:AK3894	AKE	North America	Arctoparmelia spp	Chlorolichen	65.4841	-145.417
AK3895	ARIZ:AK3895	AKE	North America	Arctoparmelia spp	Chlorolichen	65.4841	-145.417
AK3896	ARIZ:AK3896	AKE	North America	Arctoparmelia spp	Chlorolichen	65.4841	-145.417
AK3897	ARIZ:AK3897	AKE	North America	Arctoparmelia spp	Chlorolichen	65.4841	-145.417
AK3898	ARIZ:AK3898	AKE	North America	Arctoparmelia spp	Chlorolichen	65.4841	-145.417
AK3899	ARIZ:AK3899	AKE	North America	Arctoparmelia spp	Chlorolichen	65.4841	-145.417
AK3900	ARIZ:AK3900	AKE	North America	Arctoparmelia spp	Chlorolichen	65.4841	-145.417
AK3901	ARIZ:AK3901	AKE	North America	Arctoparmelia spp	Chlorolichen	65.4841	-145.417
AK3902	ARIZ:AK3902	AKE	North America	Arctoparmelia spp	Chlorolichen	65.4841	-145.417
AK3904	ARIZ:AK3904	AKE	North America	Arctoparmelia spp	Chlorolichen	65.4841	-145.417
AK3905	ARIZ:AK3905	AKE	North America	Arctoparmelia spp	Chlorolichen	65.4841	-145.417
AK3906	ARIZ:AK3906	AKE	North America	Arctoparmelia spp	Chlorolichen	65.4841	-145.417
AK3907	ARIZ:AK3907	AKE	North America	Arctoparmelia spp	Chlorolichen	65.4841	-145.417
AK3908	ARIZ:AK3908	AKE	North America	Arctoparmelia spp	Chlorolichen	65.4841	-145.417
AK3909	ARIZ:AK3909	AKE	North America	Arctoparmelia spp	Chlorolichen	65.4841	-145.417
AK3910	ARIZ:AK3910	AKE	North America	Arctoparmelia spp	Chlorolichen	65.4841	-145.417
AK3911	ARIZ:AK3911	AKE	North America	Arctoparmelia spp	Chlorolichen	65.4841	-145.417
AK3912	ARIZ:AK3912	AKE	North America	Arctoparmelia spp	Chlorolichen	65.4841	-145.417
AK3913	ARIZ:AK3913	AKE	North America	Arctoparmelia spp	Chlorolichen	65.4841	-145.417
AK3914	ARIZ:AK3914	AKE	North America	Arctoparmelia spp	Chlorolichen	65.4841	-145.417
AK3915	ARIZ:AK3915	AKE	North America	Arctoparmelia spp	Chlorolichen	65.4841	-145.417
AK3916	ARIZ:AK3916	AKE	North America	Arctoparmelia spp	Chlorolichen	65.4841	-145.417
AK3917	ARIZ:AK3917	AKE	North America	Arctoparmelia spp	Chlorolichen	65.4841	-145.417
AK3918	ARIZ:AK3918	AKE	North America	Arctoparmelia spp	Chlorolichen	65.4841	-145.417
AK3919	ARIZ:AK3919	AKE	North America	Arctoparmelia spp	Chlorolichen	65.4841	-145.417
AK3920	ARIZ:AK3920	AKE	North America	Arctoparmelia spp	Chlorolichen	65.4841	-145.417
AK3923	ARIZ:AK3923	AKE	North America	Arctoparmelia spp	Chlorolichen	65.4841	-145.417
AK3924	ARIZ:AK3924	AKE	North America	Arctoparmelia spp	Chlorolichen	65.4841	-145.417
AK3925	ARIZ:AK3925	AKE	North America	Arctoparmelia spp	Chlorolichen	65.4841	-145.417
AK3926	ARIZ:AK3926	AKE	North America	Arctoparmelia spp	Chlorolichen	65.4841	-145.417
AK3927	ARIZ:AK3927	AKE	North America	Arctoparmelia spp	Chlorolichen	65.4841	-145.417
AK3928	ARIZ:AK3928	AKE	North America	Arctoparmelia spp	Chlorolichen	65.4841	-145.417
AK3929	ARIZ:AK3929	AKE	North America	Arctoparmelia spp	Chlorolichen	65.4841	-145.417
AK3930	ARIZ:AK3930	AKE	North America	Arctoparmelia spp	Chlorolichen	65.4841	-145.417
AK3932	ARIZ:AK3932	AKE	North America	Arctoparmelia spp	Chlorolichen	65.4841	-145.417
AK3933	ARIZ:AK3933	AKE	North America	Arctoparmelia spp	Chlorolichen	65.4841	-145.417
AK3934	ARIZ:AK3934	AKE	North America	Arctoparmelia spp	Chlorolichen	65.4841	-145.417
AK3935	ARIZ:AK3935	AKE	North America	Arctoparmelia spp	Chlorolichen	65.4841	-145.417
AK3937	ARIZ:AK3937	AKE	North America	Flavocetraria cucullata	Chlorolichen	65.4841	-145.417
AK3938	ARIZ:AK3938	AKE	North America	Flavocetraria cucullata	Chlorolichen	65.4841	-145.417
AK3939	ARIZ:AK3939	AKE	North America	Flavocetraria cucullata	Chlorolichen	65.4841	-145.417
AK3940	ARIZ:AK3940	AKE	North America	Flavocetraria cucullata	Chlorolichen	65.4841	-145.417
AK3941	ARIZ:AK3941	AKE	North America	Flavocetraria cucullata	Chlorolichen	65.4841	-145.417
AK3942	ARIZ:AK3942	AKE	North America	Flavocetraria cucullata	Chlorolichen	65.4841	-145.417
AK3943	ARIZ:AK3943	AKE	North America	Flavocetraria cucullata	Chlorolichen	65.4841	-145.417
AK3944	ARIZ:AK3944	AKE	North America	Flavocetraria cucullata	Chlorolichen	65.4841	-145.417
AK3945	ARIZ:AK3945	AKE	North America	Flavocetraria cucullata	Chlorolichen	65.4841	-145.417
AK3946	ARIZ:AK3946	AKE	North America	Flavocetraria cucullata	Chlorolichen	65.4841	-145.417
AK3947	ARIZ:AK3947	AKE	North America	Flavocetraria cucullata	Chlorolichen	65.4841	-145.417
AK3948	ARIZ:AK3948	AKE	North America	Flavocetraria cucullata	Chlorolichen	65.4841	-145.417
AK3949	ARIZ:AK3949	AKE	North America	Flavocetraria cucullata	Chlorolichen	65.4841	-145.417
AK3950	ARIZ:AK3950	AKE	North America	Flavocetraria cucullata	Chlorolichen	65.4841	-145.417
AK3951	ARIZ:AK3951	AKE	North America	Flavocetraria cucullata	Chlorolichen	65.4841	-145.417
AK3953	ARIZ:AK3953	AKE	North America	Flavocetraria cucullata	Chlorolichen	65.4841	-145.417
AK3954	ARIZ:AK3954	AKE	North America	Flavocetraria cucullata	Chlorolichen	65.4841	-145.417
AK3955	ARIZ:AK3955	AKE	North America	Flavocetraria cucullata	Chlorolichen	65.4841	-145.417
AK3956	ARIZ:AK3956	AKE	North America	Flavocetraria cucullata	Chlorolichen	65.4841	-145.417
AK3957	ARIZ:AK3957	AKE	North America	Flavocetraria cucullata	Chlorolichen	65.4841	-145.417
AK3958	ARIZ:AK3958	AKE	North America	Flavocetraria cucullata	Chlorolichen	65.4841	-145.417
AK3959	ARIZ:AK3959	AKE	North America	Flavocetraria cucullata	Chlorolichen	65.4841	-145.417
AK3960	ARIZ:AK3960	AKE	North America	Flavocetraria cucullata	Chlorolichen	65.4841	-145.417
AK3961	ARIZ:AK3961	AKE	North America	Flavocetraria cucullata	Chlorolichen	65.4841	-145.417
AK3962	ARIZ:AK3962	AKE	North America	Flavocetraria cucullata	Chlorolichen	65.4841	-145.417
AK3963	ARIZ:AK3963	AKE	North America	Flavocetraria cucullata	Chlorolichen	65.4841	-145.417
AK3964	ARIZ:AK3964	AKE	North America	Flavocetraria cucullata	Chlorolichen	65.4841	-145.417
AK3965	ARIZ:AK3965	AKE	North America	Flavocetraria cucullata	Chlorolichen	65.4841	-145.417
AK3966	ARIZ:AK3966	AKE	North America	Flavocetraria cucullata	Chlorolichen	65.4841	-145.417
AK3967	ARIZ:AK3967	AKE	North America	Cladonia rangiferina	Chlorolichen	65.4841	-145.417
AK3968	ARIZ:AK3968	AKE	North America	Cladonia rangiferina	Chlorolichen	65.4841	-145.417
AK3969	ARIZ:AK3969	AKE	North America	Cladonia rangiferina	Chlorolichen	65.4841	-145.417
AK3970	ARIZ:AK3970	AKE	North America	Cladonia rangiferina	Chlorolichen	65.4841	-145.417
AK3971	ARIZ:AK3971	AKE	North America	Cladonia rangiferina	Chlorolichen	65.4841	-145.417
AK3973	ARIZ:AK3973	AKE	North America	Cladonia rangiferina	Chlorolichen	65.4841	-145.417
AK3974	ARIZ:AK3974	AKE	North America	Cladonia rangiferina	Chlorolichen	65.4841	-145.417
AK3975	ARIZ:AK3975	AKE	North America	Cladonia rangiferina	Chlorolichen	65.4841	-145.417
AK3977	ARIZ:AK3977	AKE	North America	Cladonia rangiferina	Chlorolichen	65.4841	-145.417
AK3978	ARIZ:AK3978	AKE	North America	Cladonia rangiferina	Chlorolichen	65.4841	-145.417
AK3979	ARIZ:AK3979	AKE	North America	Cladonia rangiferina	Chlorolichen	65.4841	-145.417
AK3980	ARIZ:AK3980	AKE	North America	Cladonia rangiferina	Chlorolichen	65.4841	-145.417
AK3981	ARIZ:AK3981	AKE	North America	Cladonia rangiferina	Chlorolichen	65.4841	-145.417
AK3982	ARIZ:AK3982	AKE	North America	Cladonia rangiferina	Chlorolichen	65.4841	-145.417
AK3983	ARIZ:AK3983	AKE	North America	Cladonia rangiferina	Chlorolichen	65.4841	-145.417
AK3984	ARIZ:AK3984	AKE	North America	Cladonia rangiferina	Chlorolichen	65.4841	-145.417
AK3985	ARIZ:AK3985	AKE	North America	Cladonia rangiferina	Chlorolichen	65.4841	-145.417
AK3986	ARIZ:AK3986	AKE	North America	Cladonia rangiferina	Chlorolichen	65.4841	-145.417
AK3987	ARIZ:AK3987	AKE	North America	Cladonia rangiferina	Chlorolichen	65.4841	-145.417
AK3988	ARIZ:AK3988	AKE	North America	Cladonia rangiferina	Chlorolichen	65.4841	-145.417
AK3989	ARIZ:AK3989	AKE	North America	Cladonia rangiferina	Chlorolichen	65.4841	-145.417
AK3990	ARIZ:AK3990	AKE	North America	Cladonia rangiferina	Chlorolichen	65.4841	-145.417
AK3991	ARIZ:AK3991	AKE	North America	Cladonia rangiferina	Chlorolichen	65.4841	-145.417
AK3992	ARIZ:AK3992	AKE	North America	Cladonia rangiferina	Chlorolichen	65.4841	-145.417
AK3994	ARIZ:AK3994	AKE	North America	Cladonia rangiferina	Chlorolichen	65.4841	-145.417
AK3995	ARIZ:AK3995	AKE	North America	Cladonia rangiferina	Chlorolichen	65.4841	-145.417
AK3996	ARIZ:AK3996	AKE	North America	Cladonia rangiferina	Chlorolichen	65.4841	-145.417
AK3997	ARIZ:AK3997	AKE	North America	Cladonia rangiferina	Chlorolichen	65.4841	-145.417
AK3998	ARIZ:AK3998	AKE	North America	Cladonia rangiferina	Chlorolichen	65.4841	-145.417
AK3999	ARIZ:AK3999	AKE	North America	Cladonia rangiferina	Chlorolichen	65.4841	-145.417
AK4000	ARIZ:AK4000	AKE	North America	Cladonia rangiferina	Chlorolichen	65.4841	-145.417
AK4001	ARIZ:AK4001	AKE	North America	Cladonia rangiferina	Chlorolichen	65.4841	-145.417
AK4002	ARIZ:AK4002	AKE	North America	Cladonia rangiferina	Chlorolichen	65.4841	-145.417
AK4003	ARIZ:AK4003	AKE	North America	Cladonia rangiferina	Chlorolichen	65.4841	-145.417
AK4004	ARIZ:AK4004	AKE	North America	Cladonia rangiferina	Chlorolichen	65.4841	-145.417
AK4005	ARIZ:AK4005	AKE	North America	Cladonia rangiferina	Chlorolichen	65.4841	-145.417
AK4006	ARIZ:AK4006	AKE	North America	Cladonia rangiferina	Chlorolichen	65.4841	-145.417
AK4007	ARIZ:AK4007	AKE	North America	Cladonia rangiferina	Chlorolichen	65.4841	-145.417
AK4008	ARIZ:AK4008	AKE	North America	Cladonia rangiferina	Chlorolichen	65.4841	-145.417
AK4009	ARIZ:AK4009	AKE	North America	Cladonia rangiferina	Chlorolichen	65.4841	-145.417
AK4010	ARIZ:AK4010	AKE	North America	Cladonia rangiferina	Chlorolichen	65.4841	-145.417
AK4011	ARIZ:AK4011	AKE	North America	Cladonia rangiferina	Chlorolichen	65.4841	-145.417
AK4012	ARIZ:AK4012	AKE	North America	Cladonia rangiferina	Chlorolichen	65.4841	-145.417
AK4013	ARIZ:AK4013	AKE	North America	Cladonia rangiferina	Chlorolichen	65.4841	-145.417
AK4014	ARIZ:AK4014	AKE	North America	Cladonia rangiferina	Chlorolichen	65.4841	-145.417
AK4015	ARIZ:AK4015	AKE	North America	Cladonia rangiferina	Chlorolichen	65.4841	-145.417
AK4016	ARIZ:AK4016	AKE	North America	Cladonia rangiferina	Chlorolichen	65.4841	-145.417
AK4017	ARIZ:AK4017	AKE	North America	Cladonia rangiferina	Chlorolichen	65.4841	-145.417
AK4018	ARIZ:AK4018	AKE	North America	Cladonia rangiferina	Chlorolichen	65.4841	-145.417
AK4020	ARIZ:AK4020	AKE	North America	Cladonia rangiferina	Chlorolichen	65.4841	-145.417
AK4021	ARIZ:AK4021	AKE	North America	Cladonia rangiferina	Chlorolichen	65.4841	-145.417
AK4023	ARIZ:AK4023	AKE	North America	Cladonia rangiferina	Chlorolichen	65.4841	-145.417
AK4024	ARIZ:AK4024	AKE	North America	Cladonia rangiferina	Chlorolichen	65.4841	-145.417
AK4025	ARIZ:AK4025	AKE	North America	Cladonia rangiferina	Chlorolichen	65.4841	-145.417
AK4026	ARIZ:AK4026	AKE	North America	Cladonia rangiferina	Chlorolichen	65.4841	-145.417
AK4027	ARIZ:AK4027	AKE	North America	Cladonia rangiferina	Chlorolichen	65.4841	-145.417
AK4028	ARIZ:AK4028	AKE	North America	Cladonia rangiferina	Chlorolichen	65.4841	-145.417
AK4029	ARIZ:AK4029	AKE	North America	Cladonia rangiferina	Chlorolichen	65.4841	-145.417
AK4030	ARIZ:AK4030	AKE	North America	Cladonia rangiferina	Chlorolichen	65.4841	-145.417
AK4031	ARIZ:AK4031	AKE	North America	Cladonia rangiferina	Chlorolichen	65.4841	-145.417
AK4032	ARIZ:AK4032	AKE	North America	Cladonia rangiferina	Chlorolichen	65.4841	-145.417
AK4033	ARIZ:AK4033	AKE	North America	Cladonia rangiferina	Chlorolichen	65.4841	-145.417
AK4034	ARIZ:AK4034	AKE	North America	Cladonia rangiferina	Chlorolichen	65.4841	-145.417
AK4035	ARIZ:AK4035	AKE	North America	Cladonia rangiferina	Chlorolichen	65.4841	-145.417
AK4036	ARIZ:AK4036	AKE	North America	Cladonia rangiferina	Chlorolichen	65.4841	-145.417
AK4037	ARIZ:AK4037	AKE	North America	Cladonia rangiferina	Chlorolichen	65.4841	-145.417
AK4038	ARIZ:AK4038	AKE	North America	Cladonia rangiferina	Chlorolichen	65.4841	-145.417
AK4039	ARIZ:AK4039	AKE	North America	Cladonia rangiferina	Chlorolichen	65.4841	-145.417
AK4041	ARIZ:AK4041	AKE	North America	Cladonia rangiferina	Chlorolichen	65.4841	-145.417
AK4042	ARIZ:AK4042	AKE	North America	Cladonia rangiferina	Chlorolichen	65.4841	-145.417
AK4043	ARIZ:AK4043	AKE	North America	Cladonia rangiferina	Chlorolichen	65.4841	-145.417
AK4044	ARIZ:AK4044	AKE	North America	Cladonia rangiferina	Chlorolichen	65.4841	-145.417
AK4046	ARIZ:AK4046	AKE	North America	Cladonia rangiferina	Chlorolichen	65.4841	-145.417
AK4048	ARIZ:AK4048	AKE	North America	Cladonia rangiferina	Chlorolichen	65.4841	-145.417
AK4049	ARIZ:AK4049	AKE	North America	Cladonia rangiferina	Chlorolichen	65.4841	-145.417
AK4050	ARIZ:AK4050	AKE	North America	Cladonia rangiferina	Chlorolichen	65.4841	-145.417
AK4051	ARIZ:AK4051	AKE	North America	Cladonia rangiferina	Chlorolichen	65.4841	-145.417
AK4052	ARIZ:AK4052	AKE	North America	Cladonia rangiferina	Chlorolichen	65.4841	-145.417
AK4053	ARIZ:AK4053	AKE	North America	Cladonia rangiferina	Chlorolichen	65.4841	-145.417
AK4054	ARIZ:AK4054	AKE	North America	Cladonia rangiferina	Chlorolichen	65.4841	-145.417
AK4055	ARIZ:AK4055	AKE	North America	Cladonia rangiferina	Chlorolichen	65.4841	-145.417
AK4056	ARIZ:AK4056	AKE	North America	Ophioparma ventosa	Chlorolichen	65.4849	-145.416
AK4057	ARIZ:AK4057	AKE	North America	Ophioparma ventosa	Chlorolichen	65.4849	-145.416
AK4058	ARIZ:AK4058	AKE	North America	Ophioparma ventosa	Chlorolichen	65.4849	-145.416
AK4059	ARIZ:AK4059	AKE	North America	Ophioparma ventosa	Chlorolichen	65.4849	-145.416
AK4060	ARIZ:AK4060	AKE	North America	Ophioparma ventosa	Chlorolichen	65.4849	-145.416
AK4061	ARIZ:AK4061	AKE	North America	Ophioparma ventosa	Chlorolichen	65.4849	-145.416
AK4062	ARIZ:AK4062	AKE	North America	Ophioparma ventosa	Chlorolichen	65.4849	-145.416
AK4063	ARIZ:AK4063	AKE	North America	Ophioparma ventosa	Chlorolichen	65.4849	-145.416
AK4064	ARIZ:AK4064	AKE	North America	Ophioparma ventosa	Chlorolichen	65.4849	-145.416
AK4065	ARIZ:AK4065	AKE	North America	Ophioparma ventosa	Chlorolichen	65.4849	-145.416
AK4066	ARIZ:AK4066	AKE	North America	Ophioparma ventosa	Chlorolichen	65.4849	-145.416
AK4067	ARIZ:AK4067	AKE	North America	Ophioparma ventosa	Chlorolichen	65.4849	-145.416
AK4068	ARIZ:AK4068	AKE	North America	Ophioparma ventosa	Chlorolichen	65.4849	-145.416
AK4069	ARIZ:AK4069	AKE	North America	Ophioparma ventosa	Chlorolichen	65.4849	-145.416
AK4070	ARIZ:AK4070	AKE	North America	Ophioparma ventosa	Chlorolichen	65.4849	-145.416
AK4071	ARIZ:AK4071	AKE	North America	Ophioparma ventosa	Chlorolichen	65.4849	-145.416
AK4072	ARIZ:AK4072	AKE	North America	Ophioparma ventosa	Chlorolichen	65.4849	-145.416
AK4073	ARIZ:AK4073	AKE	North America	Ophioparma ventosa	Chlorolichen	65.4849	-145.416
AK4074	ARIZ:AK4074	AKE	North America	Ophioparma ventosa	Chlorolichen	65.4849	-145.416
AK4075	ARIZ:AK4075	AKE	North America	Ophioparma ventosa	Chlorolichen	65.4849	-145.416
[truncated: 8,807 more rows]
